# Supplementary material for: The dynamic interplay of host and viral enzymes in type III CRISPR-mediated cyclic nucleotide signalling
Source: eLife. 2020 Apr 27;9:e55852. doi: 10.7554/eLife.55852 (PMC7213978; doi:10.7554/eLife.55852)
Supplement: Figure 2—figure supplement 2—source data 1. [file elife-55852-fig2-figsupp2-data1.xlsx]

## Sheet: Sheet1
Data from Rouillon et al., 2018. Elife https://doi.org/10.7554/eLife.36734.017
time	raw counts			normalised counts
	unmod1	unmod2	unmod3	unmod1	unmod2	unmod3	mean	SD	count adjusted for cA4 made (µM) with 25 nM target RNA	SD adjusted cA4 made (µM)
0	0	6	7	0	0.00365408	0.00411281	0.00258896	0.00225381	0.0756417	0.0658495
5	59	211	225	0.110694	0.128502	0.132197	0.123798	0.0114975	3.617	0.335923
10	175	584	635	0.32833	0.355664	0.37309	0.352362	0.0225621	10.2949	0.659198
20	317	979	1092	0.594747	0.596224	0.641598	0.610856	0.0266334	17.8474	0.778149
40	425	1208	1362	0.797373	0.735688	0.800235	0.777766	0.0364681	22.724	1.06549
60	483	1360	1546	0.906191	0.828258	0.908343	0.880931	0.0456286	25.7382	1.33313
80	512	1438	1683	0.9606	0.875761	0.988837	0.941733	0.0588515	27.5146	1.71946
100	533	1642	1702	1	1	1	1	0	29.217	0
