# Supplementary material for: The dynamic interplay of host and viral enzymes in type III CRISPR-mediated cyclic nucleotide signalling
Source: eLife. 2020 Apr 27;9:e55852. doi: 10.7554/eLife.55852 (PMC7213978; doi:10.7554/eLife.55852)
Supplement: Figure 2—source data 1. [file elife-55852-fig2-data1.xlsx]

## Sheet: Cleavable RNA target R1
Overnight exposure - replicate 1 unmodified RNA
St curve 1.1 1 ul spot for P/C reactions									ATP conc (nM)	Mean backgorund corrected
Background	1	1.312e-05	138.287	2.328e-05	3400	0.002	3.34544e+06
488.286453 nM	2	1.312e-05	202.094	2.328e-05	7792.46	0.003	4.88906e+06		488.286	63.807
976.572906 nM	3	1.312e-05	221.775	2.328e-05	4063.76	0.003	5.36518e+06		976.573	83.488
1953.14581 nM	4	1.312e-05	326.924	2.328e-05	6757.6	0.004	7.90894e+06		1953.15	188.637
3906.29163 nM	5	1.312e-05	453.244	2.328e-05	6861.92	0.006	1.09649e+07		3906.29	314.957
7812.58325 nM	6	1.312e-05	857.483	2.328e-05	10231.1	0.011	2.07442e+07		7812.58	719.196
15625.1665 nM	7	1.312e-05	1676.22	2.328e-05	17646.9	0.022	4.05512e+07		15625.2	1537.93
31250.333 nM	8	1.312e-05	3346.01	2.328e-05	24972	0.044	8.09466e+07		31250.3	3207.72		ATP conc (nM)	Average of two standard curves
62500.666 nM	9	1.312e-05	5075.59	2.328e-05	24994.9	0.067	1.22789e+08		62500.7	4937.3		488.286	51.3475
												976.573	74.436
St curve 1.2 1 ul spot for P/C reactions												1953.15	166.577
Background	1	1.312e-05	138.287	2.328e-05	3400	0.002	3.34544e+06					3906.29	308.988
488.286453 nM	10	1.312e-05	177.175	2.328e-05	13707.1	0.002	4.28623e+06		488.286	38.888		7812.58	679.717
976.572906 nM	11	1.312e-05	203.671	2.328e-05	9749.8	0.003	4.9272e+06		976.573	65.384		15625.2	1446.97
1953.14581 nM	12	1.312e-05	282.804	2.328e-05	6129.52	0.004	6.84161e+06		1953.15	144.517		31250.3	2995.33
3906.29163 nM	13	1.312e-05	441.307	2.328e-05	6538.85	0.006	1.06761e+07		3906.29	303.02		62500.7	4992.65
7812.58325 nM	14	1.312e-05	778.526	2.328e-05	10237	0.01	1.88341e+07		7812.58	640.239
15625.1665 nM	15	1.312e-05	1494.3	2.328e-05	14599.1	0.02	3.615e+07		15625.2	1356.01
31250.333 nM	16	1.312e-05	2921.22	2.328e-05	23562	0.038	7.06701e+07		31250.3	2782.93
62500.666 nM	17	1.312e-05	5186.29	2.328e-05	24997.9	0.068	1.25467e+08		62500.7	5048
Molecules of cA4 generated per molecule of RNA									Mean backgorund corrected			cA4 concentration (nM)	cA4 molecules produced per molecule of RNA
Background	1	1.503e-05	457.347	2.328e-05	13860.1	0.007	1.26777e+07
100 nM			Saturated
50 nM			Saturated
25 nM			Saturated
10 nM	2	1.503e-05	3668.2	2.328e-05	24999.4	0.055	1.01682e+08		3210.85			8426.75	842.675
1 nM	3	1.503e-05	589.438	2.328e-05	6012.22	0.009	1.63392e+07		132.091			434.123	434.123														A26 unmodified RNA concentration (nM)	cA4 molecules produced per molecule of RNA
0.1 nM	4	1.503e-05	384.612	2.328e-05	6116.68	0.006	1.06614e+07		-72.735	Below detection		-450.07	-4500.7														100	704.886
0.01 nM	5	1.503e-05	383.049	2.328e-05	5726.11	0.006	1.06181e+07		-74.298	Below detection		-454.847	-45484.7														50	896.947
																											25	1202.39
																											10	842.674
																											1	434.125
2 h exposure - replicate 1 unmodified RNA
St curve 1.1 1 ul spot for P/C reactions									ATP conc (nM)	Mean backgorund corrected		ATP conc (nM)	Average of two standard curves
Background	1	1.698e-05	6.91	2.328e-05	4278.78	0.0001173	216427					1953.15	8.4765
488.286453 nM									488.286			3906.29	19.2245
976.572906 nM									976.573			7812.58	58.848
1953.14581 nM	2	1.698e-05	14.964	2.328e-05	3880.09	0.0002541	468663		1953.15	8.054		15625.2	146.98
3906.29163 nM	3	1.698e-05	26.889	2.328e-05	3319.45	0.0004566	842151		3906.29	19.979		31250.3	339.647
7812.58325 nM	4	1.698e-05	73.941	2.328e-05	4268.06	0.001	2.31584e+06		7812.58	67.031		62500.7	809.196
15625.1665 nM	5	1.698e-05	165.215	2.328e-05	6144.64	0.003	5.17453e+06		15625.2	158.305		125001	1604.77
31250.333 nM	6	1.698e-05	365.562	2.328e-05	8490.67	0.006	1.14494e+07		31250.3	358.652		250003	3359.32
62500.666 nM	7	1.698e-05	903.382	2.328e-05	13048.6	0.015	2.82939e+07		62500.7	896.472		500005	3757.53
125001.33 nM	8	1.698e-05	1683.79	2.328e-05	19713	0.029	5.27363e+07		125001	1676.88
250002.66 nM	9	1.698e-05	3499.31	2.328e-05	24997.9	0.059	1.09599e+08		250003	3492.4
500005.33 nM	10	1.698e-05	3659.36	2.328e-05	24996.4	0.062	1.14611e+08		500005	3652.45																	A26 unmodified RNA concentration (nM)	cA4 concentration (nM)
																											100	70488.6
St curve 1.2 1 ul spot for P/C reactions									ATP conc (nM)	Mean backgorund corrected																	50	44847.4
Background	1	1.698e-05	6.91	2.328e-05	4278.78	0.0001173	216427																				25	30059.7
488.286453 nM									488.286																		10	8426.75
976.572906 nM									976.573																		1	434.123
1953.14581 nM	11	1.698e-05	15.809	2.328e-05	3080.91	0.0002684	495133		1953.15	8.899
3906.29163 nM	12	1.698e-05	25.38	2.328e-05	3589.39	0.000431	794914		3906.29	18.47
7812.58325 nM	13	1.698e-05	57.575	2.328e-05	3737.16	0.0009776	1.80326e+06		7812.58	50.665
15625.1665 nM	14	1.698e-05	142.565	2.328e-05	5153.33	0.002	4.46514e+06		15625.2	135.655
31250.333 nM	15	1.698e-05	327.553	2.328e-05	10980.4	0.006	1.02589e+07		31250.3	320.643
62500.666 nM	16	1.698e-05	728.829	2.328e-05	11872.5	0.012	2.28269e+07		62500.7	721.919
125001.33 nM	17	1.698e-05	1539.56	2.328e-05	20105.2	0.026	4.82191e+07		125001	1532.65
250002.66 nM	18	1.698e-05	3233.15	2.328e-05	24999.4	0.055	1.01262e+08		250003	3226.24
500005.33 nM	19	1.698e-05	3869.53	2.328e-05	24999.4	0.066	1.21194e+08		500005	3862.62
Molecules of cA4 generated per molecule of RNA									Mean backgorund corrected			cA4 concentration (nM)	cA4 molecules produced per molecule of RNA
Background	1	1.546e-05	11.054	2.328e-05	2930.66	0.0001709	315162
100 nM	2	1.546e-05	3787.07	2.328e-05	24994.9	0.059	1.07977e+08		3776.02			70488.6	704.886
50 nM	3	1.546e-05	2392.19	2.328e-05	24994.9	0.037	6.82061e+07		2381.14			44847.4	896.947
25 nM	4	1.546e-05	1587.74	2.328e-05	21705.4	0.025	4.52697e+07		1576.69			30059.7	1202.39
10 nM	5	1.546e-05	334.323	2.328e-05	7460.42	0.005	9.5322e+06		323.269			7018.92	701.892
1 nM	Below detection
0.1 nM
0.01 nM

## Sheet: Cleavable RNA target R2
Overnight exposure - replicate 2 unmodified RNA
St curve 1.1 1 ul spot for P/C reactions									ATP conc (nM)	Mean backgorund corrected
Background	1	9.017e-06	156.215	2.328e-05	3774.42	0.001	2.59817e+06
488.286453 nM	2	9.017e-06	285.834	2.328e-05	5539.97	0.003	4.75399e+06		488.286	129.619
976.572906 nM	3	9.017e-06	379.216	2.328e-05	4794.03	0.003	6.30712e+06		976.573	223.001
1953.14581 nM	4	9.017e-06	509.357	2.328e-05	12599.4	0.005	8.47163e+06		1953.15	353.142
3906.29163 nM	5	9.017e-06	787.813	2.328e-05	7287.22	0.007	1.31029e+07		3906.29	631.598
7812.58325 nM	6	9.017e-06	1271.99	2.328e-05	12915.5	0.011	2.11558e+07		7812.58	1115.78
15625.1665 nM	7	9.017e-06	2167.04	0.007	15936.7	0.02	3.60422e+07		15625.2	2010.82
31250.333 nM	8	9.017e-06	4869.78	0.117	24985.7	0.044	8.09941e+07		31250.3	4713.56		ATP conc (nM)	Average of two standard curves
62500.666 nM	9	9.017e-06	6898.44	0.381	24999.4	0.062	1.14735e+08		62500.7	6742.22		488.286	117.307
												976.573	187.375
St curve 1.2 1 ul spot for P/C reactions												1953.15	303.084
Background	1	9.017e-06	156.215	2.328e-05	3774.42	0.001	2.59817e+06					3906.29	550.661
488.286453 nM	10	9.017e-06	261.21	2.328e-05	4326.26	0.002	4.34444e+06		488.286	104.995		7812.58	1003.78
976.572906 nM	11	9.017e-06	307.965	2.328e-05	5964.42	0.003	5.12207e+06		976.573	151.75		15625.2	1915.07
1953.14581 nM	12	9.017e-06	409.24	2.328e-05	5380.24	0.004	6.80649e+06		1953.15	253.025		31250.3	4094.49
3906.29163 nM	13	9.017e-06	625.939	2.328e-05	5576.66	0.006	1.04106e+07		3906.29	469.724		62500.7	6823.52
7812.58325 nM	14	9.017e-06	1047.99	2.328e-05	9913.43	0.009	1.74302e+07		7812.58	891.777
15625.1665 nM	15	9.017e-06	1975.53	2.328e-05	17144.2	0.018	3.2857e+07		15625.2	1819.32
31250.333 nM	16	9.017e-06	3631.63	2.328e-05	22572.7	0.033	6.04012e+07		31250.3	3475.41
62500.666 nM	17	9.017e-06	7061.02	0.604	24999.4	0.064	1.17439e+08		62500.7	6904.81
Molecules of cA4 generated per molecule of RNA									Mean backgorund corrected			cA4 concentration (nM)	cA4 molecules produced per molecule of RNA
Background	1	1.15e-05	633.4	0.056	5817.03	0.007	1.34306e+07
100 nM			Saturated
50 nM			Saturated
25 nM			Saturated
10 nM	2	1.15e-05	4848.9	0.849	24999.4	0.056	1.02816e+08		4215.5			8167.33	816.733
1 nM	3	1.15e-05	708.2	2.328e-05	7009.81	0.008	1.50167e+07		74.8	Below detection		80.0215	80.0215
0.1 nM	4	1.15e-05	547.761	2.328e-05	6027.19	0.006	1.16147e+07		-85.639	Below detection		-233.336	-2333.36
0.01 nM	5	1.15e-05	617.503	2.328e-05	6885.13	0.007	1.30935e+07		-15.897	Below detection		-97.1211	-9712.11
2 h exposure - replicate 2 unmodified RNA																													A26 unmodified RNA concentration (nM)	cA4 molecules produced per molecule of RNA
St curve 1.1 1 ul spot for P/C reactions									ATP conc (nM)	Mean backgorund corrected		ATP conc (nM)	Average of two standard curves																100	711.704
Background	1	1.37e-05	12.008	2.328e-05	1587.07	0.0001645	303473					3906.29	22.7225																50	930.935
488.286453 nM									488.286			7812.58	58.9655																25	1213.07
976.572906 nM									976.573			15625.2	140.693																10	816.733
1953.14581 nM									1953.15			31250.3	348.185
3906.29163 nM	2	1.37e-05	38.274	2.328e-05	4155.32	0.0005244	967260		3906.29	26.266		62500.7	811.847
7812.58325 nM	3	1.37e-05	84.332	2.328e-05	4406.61	0.001	2.13125e+06		7812.58	72.324		125001	1696.85
15625.1665 nM	4	1.37e-05	158.416	2.328e-05	4623.84	0.002	4.00349e+06		15625.2	146.408		250003	3505.94
31250.333 nM	5	1.37e-05	417.068	2.328e-05	8206.74	0.006	1.05401e+07		31250.3	405.06		500005	4712.91
62500.666 nM	6	1.37e-05	835.952	2.328e-05	11125.5	0.011	2.11262e+07		62500.7	823.944
125001.33 nM	7	1.37e-05	1765.42	2.328e-05	17001.7	0.024	4.46158e+07		125001	1753.42
250002.66 nM	8	1.37e-05	3549.47	2.328e-05	24999.4	0.049	8.97023e+07		250003	3537.47
500005.33 nM	9	1.37e-05	4720.42	2.328e-05	24997.9	0.065	1.19294e+08		500005	4708.41
St curve 1.2 1 ul spot for P/C reactions									ATP conc (nM)	Mean backgorund corrected
Background	1	1.37e-05	12.008	2.328e-05	1587.07	0.0001645	303473
488.286453 nM									488.286
976.572906 nM									976.573
1953.14581 nM									1953.15																				A26 unmodified RNA concentration (nM)	cA4 concentration (nM)
3906.29163 nM	10	1.37e-05	31.187	2.328e-05	2867.78	0.0004273	788167		3906.29	19.179																			100	71170.4
7812.58325 nM	11	1.37e-05	57.615	2.328e-05	8861	0.0007894	1.45605e+06		7812.58	45.607																			50	46547.6
15625.1665 nM	12	1.37e-05	146.987	2.328e-05	4365.7	0.002	3.71466e+06		15625.2	134.979																			25	30326.8
31250.333 nM	13	1.37e-05	303.318	2.328e-05	6042.19	0.004	7.66544e+06		31250.3	291.31																			10	8167.33
62500.666 nM	14	1.37e-05	811.759	2.328e-05	10819.2	0.011	2.05148e+07		62500.7	799.751
125001.33 nM	15	1.37e-05	1652.29	2.328e-05	18830.2	0.023	4.17567e+07		125001	1640.28
250002.66 nM	16	1.37e-05	3486.43	2.328e-05	24985.7	0.048	8.8109e+07		250003	3474.42
500005.33 nM	17	1.37e-05	4729.42	2.328e-05	24997.9	0.065	1.19522e+08		500005	4717.41
Molecules of cA4 generated per molecule of RNA									Mean backgorund corrected			cA4 concentration (nM)	cA4 molecules produced per molecule of RNA
Background	1	1.805e-05	30.981	2.328e-05	3735.39	0.0005593	1.03168e+06
100 nM	2	1.805e-05	4004.53	2.328e-05	24999.4	0.072	1.33351e+08		3973.54			71170.4	711.704
50 nM	3	1.805e-05	2605.95	2.328e-05	24994.9	0.047	8.67783e+07		2574.97			46547.6	930.953
25 nM	4	1.805e-05	1684.61	2.328e-05	23160.8	0.03	5.60976e+07		1653.63			30326.8	1213.07
10 nM	5	1.805e-05	456.966	2.328e-05	11886.2	0.008	1.5217e+07		425.985			8713.33	871.333
1 nM	below detection
0.1 nM
0.01 nM

## Sheet: Cleavable RNA target R3
Overnight exposure - replicate 3 unmodified RNA
St curve 1.1 1 ul spot for P/C reactions									ATP conc (nM)	Mean backgorund corrected
Background	1	1.122e-05	189.425	2.328e-05	4943.51	0.002	3.92111e+06
488.286453 nM									488.286
976.572906 nM									976.573
1953.14581 nM	2	1.122e-05	485.825	2.328e-05	6130.28	0.005	1.00566e+07		1953.15	296.4
3906.29163 nM	3	1.122e-05	721.785	2.328e-05	7334.25	0.008	1.49409e+07		3906.29	532.36
7812.58325 nM	4	1.122e-05	1130.34	2.328e-05	12199.7	0.013	2.33979e+07		7812.58	940.91
15625.1665 nM	5	1.122e-05	2056.74	2.328e-05	19418.8	0.023	4.25745e+07		15625.2	1867.31
31250.333 nM	6	1.122e-05	3881.61	2.328e-05	24503	0.044	8.03492e+07		31250.3	3692.18		ATP conc (nM)	Average of two standard curves
62500.666 nM	7	1.122e-05	6190.54	0.352	24999.4	0.069	1.28144e+08		62500.7	6001.12		488.286
												976.573
St curve 1.2 1 ul spot for P/C reactions												1953.15	282.044
Background	1	1.122e-05	189.425	2.328e-05	4943.51	0.002	3.92111e+06					3906.29	494.093
488.286453 nM									488.286			7812.58	877.865
976.572906 nM									976.573			15625.2	1813.4
1953.14581 nM	8	1.122e-05	457.114	2.328e-05	6025.7	0.005	9.46226e+06		1953.15	267.689		31250.3	3601.85
3906.29163 nM	9	1.122e-05	645.251	2.328e-05	8223.36	0.007	1.33567e+07		3906.29	455.826		62500.7	5949.48
7812.58325 nM	10	1.122e-05	1004.25	2.328e-05	11697.6	0.011	2.07879e+07		7812.58	814.82
15625.1665 nM	11	1.122e-05	1948.92	0.013	15828.5	0.022	4.03427e+07		15625.2	1759.5
31250.333 nM	12	1.122e-05	3700.94	2.328e-05	24988.8	0.042	7.66096e+07		31250.3	3511.52
62500.666 nM	13	1.122e-05	6087.27	0.673	24997.9	0.068	1.26007e+08		62500.7	5897.85
Molecules of cA4 generated per molecule of RNA									Mean backgorund corrected			cA4 concentration (nM)	cA4 molecules produced per molecule of RNA
Background	1	1.019e-05	361.281	2.328e-05	6178.73	0.004	6.78919e+06
100 nM			Saturated
50 nM			Saturated
25 nM			Saturated
10 nM	2	1.019e-05	4992.5	2.328e-05	24979.6	0.051	9.3819e+07		4631.22			10088	1008.8
1 nM	3	1.019e-05	677.089	2.328e-05	6060.21	0.007	1.27239e+07		315.808	Below detection		616.045	616.045
0.1 nM	4	1.019e-05	463.574	2.328e-05	4655.39	0.005	8.71148e+06		102.293	Below detection		147.399	1473.99
0.01 nM	5	1.019e-05	485.075	2.328e-05	4691.01	0.005	9.11553e+06		123.794	Below detection		194.592	19459.2
2 h exposure - replicate 3 unmodified RNA																													A26 unmodified RNA concentration (nM)	cA4 molecules produced per molecule of RNA
St curve 1.1 1 ul spot for P/C reactions									ATP conc (nM)	Mean backgorund corrected		ATP conc (nM)	Average of two standard curves																100	600.254
Background	1	1.317e-05	10.68	2.328e-05	2201.64	0.0001407	259514					3906.29	30.5025																50	816.206
488.286453 nM									488.286			7812.58	68.688																25	1090.56
976.572906 nM									976.573			15625.2	182.581																10	1008.8
1953.14581 nM									1953.15			31250.3	435.024
3906.29163 nM	2	1.317e-05	46.185	2.328e-05	2983.14	0.0006084	1.1223e+06		3906.29	35.505		62500.7	888.11
7812.58325 nM	3	1.317e-05	89.308	2.328e-05	3562.26	0.001	2.17019e+06		7812.58	78.628		125001	1848.92
15625.1665 nM	4	1.317e-05	186.912	2.328e-05	5257.77	0.002	4.54195e+06		15625.2	176.232		250003	4053.5
31250.333 nM	5	1.317e-05	460.722	2.328e-05	7185.42	0.006	1.11956e+07		31250.3	450.042		500005	4647.35
62500.666 nM	6	1.317e-05	894.121	2.328e-05	14065.3	0.012	2.17271e+07		62500.7	883.441
125001.33 nM	7	1.317e-05	1759.87	2.328e-05	19265.7	0.023	4.27649e+07		125001	1749.19
250002.66 nM	8	1.317e-05	3903.93	2.328e-05	24994.9	0.051	9.48656e+07		250003	3893.25
500005.33 nM	9	1.317e-05	4661.39	2.328e-05	24985.7	0.061	1.13272e+08		500005	4650.71
St curve 1.2 1 ul spot for P/C reactions									ATP conc (nM)	Mean backgorund corrected
Background	1	1.317e-05	10.68	2.328e-05	2201.64	0.0001407	259514
488.286453 nM									488.286
976.572906 nM									976.573
1953.14581 nM									1953.15																				A26 unmodified RNA concentration (nM)	cA4 concentration (nM)
3906.29163 nM	10	1.317e-05	36.18	2.328e-05	2911.88	0.0004766	879172		3906.29	25.5																			100	60025.4
7812.58325 nM	11	1.317e-05	69.428	2.328e-05	3394.93	0.0009146	1.6871e+06		7812.58	58.748																			50	40810.3
15625.1665 nM	12	1.317e-05	199.61	2.328e-05	5497.67	0.003	4.85053e+06		15625.2	188.93																			25	27264
31250.333 nM	13	1.317e-05	430.686	2.328e-05	7493.8	0.006	1.04657e+07		31250.3	420.006																			10	10088
62500.666 nM	14	1.317e-05	903.459	2.328e-05	12708	0.012	2.19541e+07		62500.7	892.779
125001.33 nM	15	1.317e-05	1959.32	2.328e-05	20019.1	0.026	4.76114e+07		125001	1948.64
250002.66 nM	16	1.317e-05	4224.43	2.328e-05	24997.9	0.056	1.02654e+08		250003	4213.75
500005.33 nM	17	1.317e-05	4654.67	2.328e-05	24999.4	0.061	1.13109e+08		500005	4643.99
Molecules of cA4 generated per molecule of RNA									Mean backgorund corrected			cA4 concentration (nM)	cA4 molecules produced per molecule of RNA
Background	1	1.913e-05	22.989	2.328e-05	2972.08	0.0004397	811048
100 nM	2	1.913e-05	3854.1	2.328e-05	24997.9	0.074	1.35973e+08		3831.11			60025.4	600.254
50 nM	3	1.913e-05	2601.28	2.328e-05	24958.3	0.05	9.1773e+07		2578.29			40810.3	816.206
25 nM	4	1.913e-05	1718.06	2.328e-05	23995	0.033	6.06131e+07		1695.07			27264	1090.56
10 nM	5	1.913e-05	489.362	2.328e-05	9462.26	0.009	1.72647e+07		466.373			8418.97	841.897
1 nM	Below detection																								2
0.1 nM
0.01 nM

## Sheet: Phosphorothioate RNA target R1
Overnight exposure - modified RNA - replicate 1
St curve 1.1 1 ul spot for P/C reactions									ATP conc (nM)	Mean backgorund corrected
Background	1	1.528e-05	136.861	2.328e-05	3483.22	0.002	3.85784e+06
488.286453 nM
976.572906 nM	2	1.528e-05	219.547	2.328e-05	4687.05	0.003	6.18859e+06		976.573	82.686
1953.14581 nM	3	1.528e-05	308.138	2.328e-05	6939.69	0.005	8.6858e+06		1953.15	171.277
3906.29163 nM	4	1.528e-05	521.317	2.328e-05	13846.4	0.008	1.46949e+07		3906.29	384.456
7812.58325 nM	5	1.528e-05	916.447	2.328e-05	12735.2	0.014	2.58328e+07		7812.58	779.586
15625.1665 nM	6	1.528e-05	1768.26	2.328e-05	21974.9	0.027	4.98436e+07		15625.2	1631.39
31250.333 nM	7	1.528e-05	3807.55	2.328e-05	24999.4	0.058	1.07327e+08		31250.3	3670.69		ATP conc (nM)	Average of two standard curves
62500.666 nM	8	1.528e-05	4268.69	2.328e-05	24999.4	0.065	1.20326e+08		62500.7	4131.83
												976.573	89.8355
St curve 1.2 1 ul spot for P/C reactions												1953.15	183.867
Background	1	1.528e-05	136.861	2.328e-05	3483.22	0.002	3.85784e+06					3906.29	393.605
488.286453 nM												7812.58	790.924
976.572906 nM	1	1.528e-05	233.846	2.328e-05	4667.91	0.004	6.59164e+06		976.573	96.985		15625.2	1523.3
1953.14581 nM	2	1.528e-05	333.318	2.328e-05	9211.42	0.005	9.39557e+06		1953.15	196.457		31250.3	3415.22
3906.29163 nM	3	1.528e-05	539.614	2.328e-05	11605.9	0.008	1.52106e+07		3906.29	402.753		62500.7	4247.63
7812.58325 nM	4	1.528e-05	939.123	2.328e-05	12694.9	0.014	2.6472e+07		7812.58	802.262
15625.1665 nM	5	1.528e-05	1552.06	2.328e-05	16566.6	0.024	4.37494e+07		15625.2	1415.2
31250.333 nM	6	1.528e-05	3296.6	2.328e-05	24914.1	0.05	9.29246e+07		31250.3	3159.74
62500.666 nM	7	1.528e-05	4500.29	2.328e-05	24999.4	0.069	1.26854e+08		62500.7	4363.43
Molecules of cA4 generated per molecule of RNA									Mean backgorund corrected			cA4 concentration (nM)	cA4 molecules produced per molecule of RNA
Background	1	1.394e-05	374.668	2.328e-05	7711.74	0.005	9.63047e+06
100 nM			Saturated
50 nM			Saturated
25 nM			Saturated
10 nM			Saturated
1 nM	2	1.394e-05	1792.64	2.328e-05	13922.6	0.025	4.60781e+07		1417.97			3385.42	3385.42
0.1 nM	3	1.394e-05	447.354	2.328e-05	9747.89	0.006	1.14988e+07		72.686	Below detection		316.784	3167.84
0.01 nM	4	1.394e-05	406.361	2.328e-05	7706.65	0.006	1.04451e+07		31.693	Below detection		223.278	22327.8
2 h exposure - modified RNA - replicate 2																													A26 unmodified RNA concentration (nM)	cA4 molecules produced per molecule of RNA
St curve 1.1 1 ul spot for P/C reactions									ATP conc (nM)	Mean backgorund corrected		ATP conc (nM)	Average of two standard curves																100	739.093
Background	1	1.835e-05	3.307	2.328e-05	2981.03	6.067e-05	111906					3906.29	6.2355																50	1627.24
488.286453 nM									488.286			7812.58	16.24																25	2662.84
976.572906 nM									976.573			15625.2	44.6385																10	2243.76
1953.14581 nM									1953.15			31250.3	136.472																1	3385.42
3906.29163 nM	2	1.835e-05	9.103	2.328e-05	2121.78	0.000167	308054		3906.29	5.796		62500.7	285.075
7812.58325 nM	3	1.835e-05	19.601	2.328e-05	2746.61	0.0003596	663290		7812.58	16.294		125001	640.581
15625.1665 nM	4	1.835e-05	52.579	2.328e-05	3285.62	0.0009646	1.77928e+06		15625.2	49.272		250003	1352.62
31250.333 nM	5	1.835e-05	148.37	2.328e-05	5827.34	0.003	5.02083e+06		31250.3	145.063		500005	3080.35
62500.666 nM	6	1.835e-05	305.586	2.328e-05	9930.73	0.006	1.0341e+07		62500.7	302.279
125001.33 nM	7	1.835e-05	693.335	2.328e-05	12971.5	0.013	2.34625e+07		125001	690.028
250002.66 nM	8	1.835e-05	1466.47	2.328e-05	17872	0.027	4.96254e+07		250003	1463.16
500005.33 nM	9	1.835e-05	3163.37	2.328e-05	24999.4	0.058	1.07048e+08		500005	3160.06
St curve 1.2 1 ul spot for P/C reactions									ATP conc (nM)	Mean backgorund corrected
Background	1	1.835e-05	3.307	2.328e-05	2981.03	6.067e-05	111906
488.286453 nM									488.286
976.572906 nM									976.573
1953.14581 nM									1953.15																				A26 unmodified RNA concentration (nM)	cA4 concentration (nM)
3906.29163 nM	2	1.835e-05	9.982	2.328e-05	2991.05	0.0001831	337798		3906.29	6.675																			100	73909.3
7812.58325 nM	3	1.835e-05	19.493	2.328e-05	2725.41	0.0003576	659651		7812.58	16.186																			50	81361.8
15625.1665 nM	4	1.835e-05	43.312	2.328e-05	3552.48	0.0007946	1.46566e+06		15625.2	40.005																			25	66571
31250.333 nM	5	1.835e-05	131.189	2.328e-05	4960.49	0.002	4.43942e+06		31250.3	127.882																			10	22437.6
62500.666 nM	6	1.835e-05	271.177	2.328e-05	6639.91	0.005	9.17662e+06		62500.7	267.87																			1	3385.42
125001.33 nM	7	1.835e-05	594.441	2.328e-05	11289.9	0.011	2.01159e+07		125001	591.134
250002.66 nM	8	1.835e-05	1245.39	2.328e-05	17272	0.023	4.21439e+07		250003	1242.08
500005.33 nM	9	1.835e-05	3003.95	2.328e-05	24999.4	0.055	1.01654e+08		500005	3000.64
Molecules of cA4 generated per molecule of RNA									Mean backgorund corrected			cA4 concentration (nM)	cA4 molecules produced per molecule of RNA
Background	1	2.672e-05	4.182	2.328e-05	2831.21	0.0001117	206073
100 nM	2	2.672e-05	1744.64	2.328e-05	24991.8	0.047	8.59756e+07		1740.45			73909.3	739.093
50 nM	3	2.672e-05	1932.44	2.328e-05	24991.8	0.052	9.52307e+07		1928.26			81361.8	1627.24
25 nM	4	2.672e-05	1559.71	2.328e-05	23196	0.042	7.68626e+07		1555.53			66571	2662.84
10 nM	5	2.672e-05	447.549	2.328e-05	9191.98	0.012	2.20552e+07		443.367			22437.6	2243.76
1 nM	6	2.672e-05	27.893	2.328e-05	2852.82	0.0007452	1.37457e+06
0.1 nM	Below detection
0.01 nM

## Sheet: Phosphorothioate RNA target R2
Overnight exposure - modified RNA replicate 2
St curve 1.1 1 ul spot for P/C reactions									ATP conc (nM)	Mean backgorund corrected
Background	1	1.218e-05	272.438	2.328e-05	4009.81	0.003	6.12006e+06
488.286453 nM
976.572906 nM
1953.14581 nM	2	1.218e-05	545.026	2.328e-05	7392.22	0.007	1.22435e+07		1953.15	272.588
3906.29163 nM	3	1.218e-05	760.107	2.328e-05	10628.3	0.009	1.7075e+07		3906.29	487.669
7812.58325 nM	4	1.218e-05	1405.19	2.328e-05	12924.3	0.017	3.15662e+07		7812.58	1132.75
15625.1665 nM	5	1.218e-05	2581.53	2.328e-05	20544.1	0.031	5.79915e+07		15625.2	2309.09
31250.333 nM	6	1.218e-05	4628.59	2.328e-05	24997.9	0.056	1.03977e+08		31250.3	4356.15		ATP conc (nM)	Average of two standard curves
62500.666 nM	7	1.218e-05	4876.44	0.358	24991.8	0.059	1.09544e+08		62500.7	4604.01
St curve 1.2 1 ul spot for P/C reactions												1953.15	260.549
Background	1	1.218e-05	272.438	2.328e-05	4009.81	0.003	6.12006e+06					3906.29	504.15
488.286453 nM												7812.58	1072.22
976.572906 nM												15625.2	2165.78
1953.14581 nM	1	1.218e-05	520.949	2.328e-05	5532.07	0.006	1.17026e+07		1953.15	248.511		31250.3	4091.42
3906.29163 nM	2	1.218e-05	793.069	2.328e-05	10105.6	0.01	1.78155e+07		3906.29	520.631		62500.7	4673.47
7812.58325 nM	3	1.218e-05	1284.12	2.328e-05	12083.8	0.016	2.88465e+07		7812.58	1011.69
15625.1665 nM	4	1.218e-05	2294.89	2.328e-05	20593.9	0.028	5.15525e+07		15625.2	2022.46
31250.333 nM	5	1.218e-05	4099.12	0.003	24985.7	0.05	9.20827e+07		31250.3	3826.68
62500.666 nM	6	1.218e-05	5015.36	0.061	24961.3	0.061	1.12665e+08		62500.7	4742.93
Molecules of cA4 generated per molecule of RNA									Mean backgorund corrected			cA4 concentration (nM)	cA4 molecules produced per molecule of RNA
Background	1	1.001e-05	576.872	2.328e-05	6464.15	0.006	1.06537e+07
100 nM			Saturated
50 nM			Saturated
25 nM			Saturated
10 nM			Saturated
1 nM	1	1.001e-05	2390.51	0.524	14335.6	0.024	4.4148e+07		1813.64			3398.61	3398.61
0.1 nM	2	1.001e-05	708.914	0.0002096	5569.46	0.007	1.30922e+07		132.042	Below detection		196.782	1967.82
0.01 nM	3	1.001e-05	589.218	0.047	8233.86	0.006	1.08817e+07		12.346	Below detection		-31.1234	-3112.34
2 h exposure - modified RNA replicate 2																													A26 unmodified RNA concentration (nM)	cA4 molecules produced per molecule of RNA
St curve 1.1 1 ul spot for P/C reactions									ATP conc (nM)	Mean backgorund corrected		ATP conc (nM)	Average of two standard curves																100	972.153
Background	1	1.423e-05	3.98	2.328e-05	1937.48	5.663e-05	104455																						50	1787.16
488.286453 nM												7812.58	30.3025																25	3168.51
976.572906 nM												15625.2	82.107																10	4044.88
1953.14581 nM												31250.3	189.969																1	3398.61
3906.29163 nM												62500.7	422.593
7812.58325 nM	2	1.423e-05	37.369	2.328e-05	2693.26	0.0005317	980711		7812.58	33.389		125001	971.768
15625.1665 nM	3	1.423e-05	92.746	2.328e-05	3781.54	0.001	2.43402e+06		15625.2	88.766		250003	1948.68
31250.333 nM	4	1.423e-05	207.168	2.328e-05	5923.5	0.003	5.43692e+06		31250.3	203.188		500005	3949.16
62500.666 nM	5	1.423e-05	459.755	2.328e-05	8512.02	0.007	1.20658e+07		62500.7	455.775
125001.33 nM	6	1.423e-05	1002.6	2.328e-05	14607.3	0.014	2.63122e+07		125001	998.617
250002.66 nM	7	1.423e-05	1990.23	2.328e-05	22203	0.028	5.22317e+07		250003	1986.25
500005.33 nM	8	1.423e-05	4011.4	2.328e-05	24999.4	0.057	1.05275e+08		500005	4007.42
St curve 1.2 1 ul spot for P/C reactions									ATP conc (nM)	Mean backgorund corrected
Background	1	1.423e-05	3.98	2.328e-05	1937.48	5.663e-05	104455
488.286453 nM									488.286
976.572906 nM									976.573
1953.14581 nM																													A26 unmodified RNA concentration (nM)	cA4 concentration (nM)
3906.29163 nM																													100	97215.3
7812.58325 nM	1	1.423e-05	31.196	2.328e-05	2512.1	0.0004439	818712		7812.58	27.216																			50	89358.1
15625.1665 nM	2	1.423e-05	79.428	2.328e-05	4720.81	0.001	2.08451e+06		15625.2	75.448																			25	79212.7
31250.333 nM	3	1.423e-05	180.729	2.328e-05	5897.53	0.003	4.74305e+06		31250.3	176.749																			10	40448.8
62500.666 nM	4	1.423e-05	393.391	2.328e-05	7438.76	0.006	1.03241e+07		62500.7	389.411																			1	3398.61
125001.33 nM	5	1.423e-05	948.9	2.328e-05	11731	0.014	2.49029e+07		125001	944.92
250002.66 nM	6	1.423e-05	1915.09	2.328e-05	21102.5	0.027	5.02596e+07		250003	1911.11
500005.33 nM	7	1.423e-05	3894.89	2.328e-05	24997.9	0.055	1.02217e+08		500005	3890.91
Molecules of cA4 generated per molecule of RNA									Mean backgorund corrected			cA4 concentration (nM)	cA4 molecules produced per molecule of RNA
Background	1	2.125e-05	9.617	2.328e-05	2817.36	0.0002044	377018
100 nM	2	2.125e-05	3066.99	2.328e-05	24999.4	0.065	1.20238e+08		3057.37			97215.3	972.153
50 nM	3	2.125e-05	2815.55	2.328e-05	24993.3	0.06	1.10381e+08		2805.94			89358.1	1787.16
25 nM	4	2.125e-05	2490.9	2.328e-05	24964.4	0.053	9.76533e+07		2481.28			79212.7	3168.51
10 nM	5	2.125e-05	1250.46	2.328e-05	16767.2	0.027	4.90229e+07		1240.84			40448.7	4044.87
1 nM	6	2.125e-05	49.354	2.328e-05	3625.91	0.001	1.93486e+06
0.1 nM	Below detection
0.01 nM

## Sheet: Phosphorothioate RNA target R3
Overnight exposure - modified RNA replicate 3
St curve 1.1 1 ul spot for P/C reactions									ATP conc (nM)	Mean backgorund corrected
Background	1	9.16e-06	275.742	2.328e-05	3971.4	0.003	4.65894e+06
488.286453 nM
976.572906 nM	2	9.16e-06	492.022	2.328e-05	5723.92	0.005	8.3132e+06		976.573	216.28
1953.14581 nM	3	9.16e-06	728.887	2.328e-05	8815.63	0.007	1.23153e+07		1953.15	453.145
3906.29163 nM	4	9.16e-06	1263.4	2.328e-05	12491.3	0.012	2.13464e+07		3906.29	987.655
7812.58325 nM	5	9.16e-06	2173.96	2.328e-05	17738.1	0.02	3.67313e+07		7812.58	1898.22
15625.1665 nM	6	9.16e-06	4541.57	0.713	24991.8	0.042	7.67344e+07		15625.2	4265.83
31250.333 nM	7	9.16e-06	6485.33	2.328e-05	24997.9	0.059	1.09576e+08		31250.3	6209.59		ATP conc (nM)	Average of two standard curves
62500.666 nM
												976.573	211.48
St curve 1.2 1 ul spot for P/C reactions												1953.15	426.581
Background	1	9.16e-06	275.742	2.328e-05	3971.4	0.003	4.65894e+06					3906.29	967.317
488.286453 nM												7812.58	1887.41
976.572906 nM	1	9.16e-06	482.422	2.328e-05	6826.79	0.004	8.151e+06		976.573	206.68		15625.2	4031
1953.14581 nM	2	9.16e-06	675.759	2.328e-05	6650.14	0.006	1.14176e+07		1953.15	400.017		31250.3	6128.67
3906.29163 nM	3	9.16e-06	1222.72	2.328e-05	13625.9	0.011	2.06591e+07		3906.29	946.979
7812.58325 nM	4	9.16e-06	2152.35	2.328e-05	14463	0.02	3.6366e+07		7812.58	1876.61
15625.1665 nM	5	9.16e-06	4071.92	0.149	24952.2	0.037	6.87992e+07		15625.2	3796.18
31250.333 nM	6	9.16e-06	6323.5	0.531	24991.8	0.058	1.06842e+08		31250.3	6047.76
62500.666 nM
Molecules of cA4 generated per molecule of RNA									Mean backgorund corrected			cA4 concentration (nM)	cA4 molecules produced per molecule of RNA
Background	1	1.182e-05	434.439	2.328e-05	5692.57	0.005	9.47424e+06
100 nM			Saturated
50 nM			Saturated
25 nM			Saturated
10 nM			Saturated
1 nM	2	1.182e-05	2447.89	2.328e-05	16455	0.029	5.33837e+07		2013.45			2001.44	2001.44
0.1 nM	3	1.182e-05	592.474	2.328e-05	4810.74	0.007	1.29207e+07		158.035	Below detection		222.173	2221.73
0.01 nM	4	1.182e-05	600.16	2.328e-05	6958.19	0.007	1.30883e+07		165.721	Below detection		229.544	22954.4
2 h exposure - modified RNA replicate 3																													A26 unmodified RNA concentration (nM)	cA4 molecules produced per molecule of RNA
St curve 1.1 1 ul spot for P/C reactions									ATP conc (nM)	Mean backgorund corrected		ATP conc (nM)	Average of two standard curves																100	683.793
Background	1	1.585e-05	5.628	2.328e-05	1578.24	8.919e-05	164522					3906.29	13.169																50	1946.87
488.286453 nM									488.286			7812.58	39.5675																25	3672.95
976.572906 nM									976.573			15625.2	112.485																10	3564.32
1953.14581 nM									1953.15			31250.3	250.966																1	2001.44
3906.29163 nM	2	1.585e-05	17.937	2.328e-05	2523.24	0.0002843	524349		3906.29	12.309		62500.7	550.428
7812.58325 nM	3	1.585e-05	48.724	2.328e-05	3588.81	0.0007722	1.42429e+06		7812.58	43.096		125001	1173.49
15625.1665 nM	4	1.585e-05	125.9	2.328e-05	4913.03	0.002	3.6803e+06		15625.2	120.272		250003	2509.14
31250.333 nM	5	1.585e-05	258.601	2.328e-05	8138.69	0.004	7.55944e+06		31250.3	252.973		500005	4007.28
62500.666 nM	6	1.585e-05	566.785	2.328e-05	11350.5	0.009	1.65683e+07		62500.7	561.157
125001.33 nM	7	1.585e-05	1213.55	2.328e-05	17695.7	0.019	3.54745e+07		125001	1207.92
250002.66 nM	8	1.585e-05	2509.09	2.328e-05	24976.6	0.04	7.33457e+07		250003	2503.46
500005.33 nM	9	1.585e-05	4082.36	2.328e-05	24999.4	0.065	1.19336e+08		500005	4076.73
St curve 1.2 1 ul spot for P/C reactions									ATP conc (nM)	Mean backgorund corrected
Background	1	1.585e-05	5.628	2.328e-05	1578.24	8.919e-05	164522
488.286453 nM									488.286
976.572906 nM									976.573
1953.14581 nM									1953.15																				A26 unmodified RNA concentration (nM)	cA4 concentration (nM)
3906.29163 nM	10	1.585e-05	19.657	2.328e-05	6352.13	0.0003115	574611		3906.29	14.029																			100	68379.3
7812.58325 nM	11	1.585e-05	41.667	2.328e-05	4476.07	0.0006603	1.218e+06		7812.58	36.039																			50	97343.6
15625.1665 nM	12	1.585e-05	110.326	2.328e-05	6528.71	0.002	3.22505e+06		15625.2	104.698																			25	91823.8
31250.333 nM	13	1.585e-05	254.586	2.328e-05	8446.26	0.004	7.44207e+06		31250.3	248.958																			10	35643.1
62500.666 nM	14	1.585e-05	545.326	2.328e-05	11383.4	0.009	1.5941e+07		62500.7	539.698																			1	2001.44
125001.33 nM	15	1.585e-05	1144.68	2.328e-05	15191.5	0.018	3.34612e+07		125001	1139.05
250002.66 nM	16	1.585e-05	2520.45	2.328e-05	24429	0.04	7.36777e+07		250003	2514.82
500005.33 nM	17	1.585e-05	3943.46	2.328e-05	24999.4	0.062	1.15275e+08		500005	3937.84
Molecules of cA4 generated per molecule of RNA									Mean backgorund corrected			cA4 concentration (nM)	cA4 molecules produced per molecule of RNA
Background	1	1.967e-05	7.765	2.328e-05	3398.87	0.0001528	281786
100 nM	2	1.967e-05	2355.29	2.328e-05	24987.2	0.046	8.54689e+07		2347.53			68379.3	683.793
50 nM	3	1.967e-05	3293.74	2.328e-05	24997.9	0.065	1.19523e+08		3285.97			97343.6	1946.87
25 nM	4	1.967e-05	3114.9	2.328e-05	24984.2	0.061	1.13033e+08		3107.13			91823.8	3672.95
10 nM	5	1.967e-05	1294.64	2.328e-05	18558.4	0.025	4.698e+07		1286.88			35643.1	3564.31
1 nM	6	1.967e-05	71.318	2.328e-05	4500.64	0.001	2.588e+06
0.1 nM	Below detection
0.01 nM

## Sheet: Summary all
	cA4 concentration (nM)
A26 unmodified RNA concentration (nM)	R1	R2	R3	Mean	StDev	Mean/1000	StDev/1000
100	70488.6	71170.4	60025.4	67228.1	6247.04	67.2281	6.24704
50	44847.4	46547.6	40810.3	44068.4	2946.92	44.0684	2.94692
25	30059.7	30326.8	27264	29216.9	1696.48	29.2169	1.69648
10	8426.75	8167.33	10088	8894.02	1042.1	8.89402	1.0421
	cA4 molecules produced per molecule of RNA
A26 unmodified RNA concentration (nM)	R1	R2	R3	Mean	StDev
100	704.886	711.704	600.254	672.281	62.4706
50	896.947	930.935	816.206	881.363	58.9308
25	1202.39	1213.07	1090.56	1168.67	67.8588
10	842.674	816.733	1008.8	889.401	104.21
Total of 50 to 10 nM				979.813	23.9838
	cA4 concentration (nM)
A26 Phosphorothioate RNA concentration (nM)	R1	R2	R3	Mean	StDev	Mean/1000	StDev/1000
100	73909.3	97215.3	68379.3	79834.6	15304	79.8346	15.304
50	81361.8	89358.1	97343.6	89354.5	7990.91	89.3545	7.99091
25	66571	79212.7	91823.8	79202.5	12626.4	79.2025	12.6264
10	22437.6	40448.8	35643.1	32843.2	9326.33	32.8432	9.32633
1	3385.42	3398.61	2001.44	2928.49	802.876	2.92849	0.802876
	cA4 molecules produced per molecule of RNA
A26 Phosphorothioate RNA concentration (nM)	R1	R2	R3	Mean	StDev
100	739.093	972.153	683.793	798.346	153.04
50	1627.24	1787.16	1946.87	1787.09	159.818
25	2662.84	3168.51	3672.95	3168.1	505.056
10	2243.76	4044.88	3564.32	3284.32	932.633
1	3385.42	3398.61	2001.44	2928.49	802.876
Total of 25 to 1 nM				3126.97	746.855
