# Supplementary material for: The dynamic interplay of host and viral enzymes in type III CRISPR-mediated cyclic nucleotide signalling
Source: eLife. 2020 Apr 27;9:e55852. doi: 10.7554/eLife.55852 (PMC7213978; doi:10.7554/eLife.55852)
Supplement: Figure 3—source data 1. [file elife-55852-fig3-data1.xlsx]

## Sheet: Sheet1
Replicate 1
[SsoCsx1 dimer]	Area	Mean	Min	Max		[SsoCsx1]	background adjusted count	Percentage bound compared to 20 uM Csx1 dimer	Fraction bound												[SsoCsx1]	Mean percentage bound (R1-4)	Percentage bound SD	Mean fraction of cA4 bound	Fraction bound SD
Background	1.835e-05	5.989	2.328e-05	238.726		0	0.215	0.0570207	0.000570207												0.01	0.266007	0.308075	0.00266007	0.00308075
control	1.835e-05	6.204	2.328e-05	484.158		0.01	2.472	0.655606	0.00655606												0.05	10.6236	3.26722	0.106236	0.0326722
0.01	1.835e-05	8.461	2.328e-05	985.565		0.05	56.359	14.9471	0.149471												0.1	25.1235	4.86322	0.251235	0.0486322
0.05	1.835e-05	62.348	2.328e-05	962.075		0.1	114.246	30.2995	0.302995												0.2	42.9883	5.93396	0.429883	0.0593396
0.1	1.835e-05	120.235	2.328e-05	1825.31		0.2	191.747	50.8537	0.508537												0.4	56.621	4.48136	0.56621	0.0448136
0.2	1.835e-05	197.736	2.328e-05	1918.83		0.4	235.288	62.4013	0.624013												0.6	60.4018	4.5406	0.604018	0.045406
0.4	1.835e-05	241.277	2.328e-05	2750.15		0.6	245.989	65.2394	0.652394												0.8	63.0925	3.63339	0.630925	0.0363339
0.6	1.835e-05	251.978	2.328e-05	2332.12		0.8	250.468	66.4273	0.664273												1	65.5475	2.92848	0.655475	0.0292848
0.8	1.835e-05	256.457	2.328e-05	2404.92		1	259.548	68.8354	0.688354												2	69.2517	4.22167	0.692517	0.0422167
1	1.835e-05	265.537	2.328e-05	2715.84		2	271.307	71.954	0.71954												4	75.4061	6.0296	0.754061	0.060296
2	1.835e-05	277.296	2.328e-05	2881.76		4	296.965	78.7589	0.787589												8	82.8163	3.72344	0.828163	0.0372344
4	1.835e-05	302.954	2.328e-05	3335.03		8	310.948	82.4673	0.824673												10	91.7475	7.02774	0.917475	0.0702774
8	1.835e-05	316.937	2.328e-05	3841.12		10	316.231	83.8684	0.838684												20	100	10.9901	1	0.109901
10	1.835e-05	322.22	2.328e-05	3148.78		20	377.056	100	1
20	1.835e-05	383.045	2.328e-05	4867.81																	Area ajusted count
																					R1	2.08744e+07
																					R4	9.31125e+06
																					R5	9.87414e+06
Replicate 2																							% error
[SsoCsx1 dimer]	Area	Mean	Min	Max		[SsoCsx1]	background adjusted count	Percentage bound compared to 20 uM Csx1 dimer	Fraction bound												20 uM area adjusted mean	5.93221e+07
Background	1.552e-05	6.543	2.328e-05	371.799		0	-0.929	-0.228063	-0.00228063												SD of area adjusted mean for 20 uM	6.51957e+06	10.9901
control	1.552e-05	5.614	2.328e-05	364.761		0.01	-0.136	-0.0333871	-0.000333871
0.01	1.552e-05	6.407	2.328e-05	362.185		0.05	43.012	10.5592	0.105592
0.05	1.552e-05	49.555	2.328e-05	751.726		0.1	107.611	26.4178	0.264178
0.1	1.552e-05	114.154	2.328e-05	1484.96		0.2	160.615	39.4299	0.394299
0.2	1.552e-05	167.158	2.328e-05	1818.31		0.4	228.352	56.0589	0.560589
0.4	1.552e-05	234.895	2.328e-05	1725.29		0.6	244.361	59.989	0.59989
0.6	1.552e-05	250.904	2.328e-05	2013.4		0.8	264.813	65.0098	0.650098
0.8	1.552e-05	271.356	2.328e-05	1961.34		1	268.728	65.9709	0.659709
1	1.552e-05	275.271	2.328e-05	2164.67		2	295.887	72.6383	0.726383
2	1.552e-05	302.43	2.328e-05	2302.86		4	327.936	80.5061	0.805061
4	1.552e-05	334.479	2.328e-05	2238.02		8	354.009	86.9069	0.869069
8	1.552e-05	360.552	2.328e-05	2523.72		10	404.69	99.3487	0.993487
10	1.552e-05	411.233	2.328e-05	2673.26		20	407.343	100	1
20	1.552e-05	413.886	2.328e-05	2776.02
Replicate 3
[SsoCsx1 dimer]	Area	Mean	Min	Max		[SsoCsx1]	background adjusted count	Percentage bound compared to 20 uM Csx1 dimer	Fraction bound
Background	1.529e-05	1.346	2.328e-05	144.363		0	0.198	0.140403	0.00140403
control	1.529e-05	1.544	2.328e-05	134.339		0.01	0.114	0.0808379	0.000808379
0.01	1.529e-05	1.46	2.328e-05	182.807		0.05	9.921	7.03502	0.0703502
0.05	1.529e-05	11.267	2.328e-05	475.07		0.1	26.238	18.6055	0.186055
0.1	1.529e-05	27.584	2.328e-05	611.568		0.2	52.927	37.5308	0.375308
0.2	1.529e-05	54.273	2.328e-05	811.065		0.4	72.587	51.4717	0.514717
0.4	1.529e-05	73.933	2.328e-05	1125		0.6	76.738	54.4152	0.544152
0.6	1.529e-05	78.084	2.328e-05	1256.83		0.8	81.962	58.1196	0.581196
0.8	1.529e-05	83.308	2.328e-05	1002.91		1	87.026	61.7105	0.617105
1	1.529e-05	88.372	2.328e-05	1263.34		2	89.359	63.3648	0.633648
2	1.529e-05	90.705	2.328e-05	1338.17		4	94.389	66.9316	0.669316
4	1.529e-05	95.735	2.328e-05	1379.79		8	109.952	77.9674	0.779674
8	1.529e-05	111.298	2.328e-05	1339.58		10	124.279	88.1268	0.881268
10	1.529e-05	125.625	2.328e-05	1597.47		20	141.023	100	1
20	1.529e-05	142.369	2.328e-05	1855.12
Replicate 4
[SsoCsx1 dimer]	Area	Mean	Min	Max		[SsoCsx1]	background adjusted count	Percentage bound compared to 20 uM Csx1 dimer	Fraction bound
Background	1.775e-05	3.785	2.328e-05	419.38		0	0.315	0.183694	0.00183694
control	1.775e-05	4.1	2.328e-05	376.653		0.01	0.619	0.360973	0.00360973
0.01	1.775e-05	4.404	2.328e-05	1298.22		0.05	17.068	9.95329	0.0995329
0.05	1.775e-05	20.853	2.328e-05	1142.22		0.1	43.164	25.1713	0.251713
0.1	1.775e-05	46.949	2.328e-05	819.055		0.2	75.69	44.139	0.44139
0.2	1.775e-05	79.475	2.328e-05	1397.05		0.4	96.976	56.552	0.56552
0.4	1.775e-05	100.761	2.328e-05	1211.74		0.6	106.256	61.9637	0.619637
0.6	1.775e-05	110.041	2.328e-05	1489.43		0.8	107.713	62.8134	0.628134
0.8	1.775e-05	111.498	2.328e-05	1337.46		1	112.617	65.6732	0.656732
1	1.775e-05	116.402	2.328e-05	1748.21		2	118.407	69.0496	0.690496
2	1.775e-05	122.192	2.328e-05	1500.25		4	129.344	75.4276	0.754276
4	1.775e-05	133.129	2.328e-05	1858.44		8	143.913	83.9236	0.839236
8	1.775e-05	147.698	2.328e-05	1746.19		10	164.015	95.6462	0.956462
10	1.775e-05	167.8	2.328e-05	1963.91		20	171.481	100	1
20	1.775e-05	175.266	2.328e-05	2203
