# Supplementary material for: The dynamic interplay of host and viral enzymes in type III CRISPR-mediated cyclic nucleotide signalling
Source: eLife. 2020 Apr 27;9:e55852. doi: 10.7554/eLife.55852 (PMC7213978; doi:10.7554/eLife.55852)
Supplement: Figure 4—source data 1. [file elife-55852-fig4-data1.xlsx]

## Sheet: Multiple turnover 1.25 uM RNA 
1.25 uM A1 RNA replicate 1	Lane	Area	Mean	Min	Max		Time (min)	Uncut adjusted	Cut compared to adjusted RNA and Csx1 control											Replicate 1	Rate from linear region
Background	1	1.429e-05	73.094	2.328e-05	1574.41		5	314.742	0.172396											1	0.0276
RNA	2	1.429e-05	376.826	2.328e-05	3343.96		10	265.372	0.302213											2	0.0205
RNA+Csx1	3	1.429e-05	453.399	0.0008382	3928.34		15	215.123	0.434341											3	0.0235
5	4	1.429e-05	387.836	2.328e-05	3640.45		20	184.504	0.514853
10	5	1.429e-05	338.466	2.328e-05	3020.68		30	130.597	0.656599
15	6	1.429e-05	288.217	2.328e-05	2693.76		40	99.907	0.737298
20	7	1.429e-05	257.598	2.328e-05	2651.35		60	56.63	0.851093
30	8	1.429e-05	203.691	2.328e-05	2358.76
40	9	1.429e-05	173.001	2.328e-05	1766.82
60	10	1.429e-05	129.724	2.328e-05	3013.79
1.25 uM A1 RNA replicate 2	Lane	Area	Mean	Min	Max		Time (min)	Uncut adjusted	Cut compared to adjusted RNA and Csx1 control
Background	1	1.302e-05	3.579	2.328e-05	374.782		5	104.334	0.0369762
RNA	2	1.302e-05	106.753	2.328e-05	2544.61		10	91.165	0.158529
RNA+Csx1	3	1.302e-05	111.919	2.328e-05	1853.45		15	76.869	0.290484
5	4	1.302e-05	107.913	2.328e-05	2120.89		20	58.088	0.463836
10	5	1.302e-05	94.744	2.328e-05	1845.57		30	41.994	0.612387
15	6	1.302e-05	80.448	2.328e-05	1739.75		40	29.502	0.727691
20	7	1.302e-05	61.667	2.328e-05	1205.03		60	13.886	0.871829
30	8	1.302e-05	45.573	2.328e-05	1070.33
40	9	1.302e-05	33.081	2.328e-05	1008.73
60	10	1.302e-05	17.465	2.328e-05	744.862
1.25 uM A1 RNA replicate 3	Lane	Area	Mean	Min	Max
Background	1	1.415e-05	3.449	2.328e-05	374.782		Time (min)	Uncut adjusted	Cut compared to adjusted RNA and Csx1 control
RNA	2	1.415e-05	120.109	2.328e-05	1980.19		5	130.869	0.0535462
RNA+Csx1	3	1.415e-05	141.722	2.328e-05	2299.61		10	104.437	0.244704
5	4	1.415e-05	134.318	2.328e-05	2157.49		15	91.248	0.340088
10	5	1.415e-05	107.886	2.328e-05	2497.13		20	70.396	0.490891
15	6	1.415e-05	94.697	2.328e-05	1832.74		30	49.947	0.63878
20	7	1.415e-05	73.845	2.328e-05	1563.32		40	32.257	0.766715
30	8	1.415e-05	53.396	2.328e-05	1144.18		60	17.168	0.87584
40	9	1.415e-05	35.706	2.328e-05	1528.42
60	10	1.415e-05	20.617	2.328e-05	929.135

## Sheet: Multiple turnover 1.5 uM RNA 
1.5 uM A1 RNA replicate 1	Lane	Area	Mean	Min	Max		Time (min)	Uncut adjusted	Cut compared to adjusted RNA and Csx1 control											Replicate 1	Rate from linear region
Background	1	1.3e-05	9.433	2.33e-05	578.844		5	190.698	0.0881191											1	0.0211
RNA	2	1.3e-05	203.365	2.33e-05	2705.79		10	166.502	0.20382											2	0.0193
RNA+Csx1	3	1.3e-05	218.559	2.33e-05	2471.64		15	139.759	0.3317											3	0.0316
5	4	1.3e-05	200.131	2.33e-05	2583.71		20	121.88	0.417193
10	5	1.3e-05	175.935	2.33e-05	2115.56		25.5	105.944	0.493396
15	6	1.3e-05	149.192	2.33e-05	2098.73		30	87.675	0.580755
20	7	1.3e-05	131.313	2.33e-05	1879.3		40	68.014	0.67477
25.5	8	1.3e-05	115.377	2.33e-05	1564.85
30	9	1.3e-05	97.108	2.33e-05	1588.99
40	10	1.3e-05	77.447	2.33e-05	1407.53
1.5 uM A1 RNA replicate 2	Lane	Area	Mean	Min	Max		Time (min)	Uncut adjusted	Cut compared to adjusted RNA and Csx1 control
Background	1	1.427e-05	11.008	2.328e-05	396.576		5	120.408	0.0441306
RNA	2	1.427e-05	119.637	2.328e-05	2106.69		10	94.52	0.249645
RNA+Csx1	3	1.427e-05	136.975	2.328e-05	2456.78		15	92.418	0.266332
5	4	1.427e-05	131.416	2.328e-05	2276.07		20	76.919	0.389372
10	5	1.427e-05	105.528	2.328e-05	1850.96		25.5	67.805	0.461724
15	6	1.427e-05	103.426	2.328e-05	1663.71		30	62.094	0.507061
20	7	1.427e-05	87.927	2.328e-05	1622.25		40	43.332	0.656005
25.5	8	1.427e-05	78.813	2.328e-05	1302.05
30	9	1.427e-05	73.102	2.328e-05	1170.44
40	10	1.427e-05	54.34	2.328e-05	1028.75
1.5 uM A1 RNA replicate 3	Lane	Area	Mean	Min	Max
Background	1	1.174e-05	7.058	2.328e-05	754.639		Time (min)	Uncut adjusted	Cut compared to adjusted RNA and Csx1 control
RNA	2	1.174e-05	168.537	2.328e-05	2398.3		5	146.536	0.187694
RNA+Csx1	3	1.174e-05	187.453	2.328e-05	2198.02		10	116.942	0.351745
5	4	1.174e-05	153.594	2.328e-05	2149.43		15	93.754	0.480285
10	5	1.174e-05	124	2.328e-05	1556.84		20	71.679	0.602655
15	6	1.174e-05	100.812	2.328e-05	1909.97		25.5	56.586	0.686322
20	7	1.174e-05	78.737	2.328e-05	1669.62		30	36.452	0.797932
25.5	8	1.174e-05	63.644	2.328e-05	1277.79		40	24.009	0.866909
30	9	1.174e-05	43.51	2.328e-05	2854.88
40	10	1.174e-05	31.067	2.328e-05	868.386

## Sheet: Multiple turnover 2 uM RNA 
2 uM A1 RNA replicate 1	Lane	Area	Mean	Min	Max		Time (min)	Uncut adjusted	Cut compared to adjusted RNA and Csx1 control											Replicate 1	Rate from linear region
Background	1	1.197e-05	10.178	2.328e-05	505.191		5	193.625	0.055824											1	0.0158
RNA	2	1.197e-05	188.196	2.328e-05	3504.33		10	172.412	0.159265											2	0.0198
RNA+Csx1	3	1.197e-05	215.251	2.328e-05	2530.03		15	158.917	0.225071											3	0.0208
5	4	1.197e-05	203.803	2.328e-05	3145.53		20	137.172	0.331106
10	5	1.197e-05	182.59	2.328e-05	2340.52		25	116.06	0.434055
15	6	1.197e-05	169.095	2.328e-05	2333.52		30	107.693	0.474855
20	7	1.197e-05	147.35	2.328e-05	2469.24		40	87.295	0.574322
25	8	1.197e-05	126.238	2.328e-05	1855.12
30	9	1.197e-05	117.871	2.328e-05	2003.02
40	10	1.197e-05	97.473	2.328e-05	1563.32
2 uM A1 RNA replicate 2	Lane	Area	Mean	Min	Max		Time (min)	Uncut adjusted	Cut compared to adjusted RNA and Csx1 control
Background	1	1.335e-05	13.305	2.328e-05	670.438		5	307.679	0.0094554
RNA	2	1.335e-05	254.484	2.328e-05	2519.85		10	253.774	0.182998
RNA+Csx1	3	1.335e-05	323.921	2.328e-05	2901.99		15	220.395	0.290458
5	4	1.335e-05	320.984	2.328e-05	3317.78		20	176.741	0.430998
10	5	1.335e-05	267.079	2.328e-05	2644.4		25	156.936	0.494759
15	6	1.335e-05	233.7	2.328e-05	2731.46		30	115.48	0.628223
20	7	1.335e-05	190.046	2.328e-05	2263.2		40	75.424	0.757179
25	8	1.335e-05	170.241	2.328e-05	2444.36
30	9	1.335e-05	128.785	2.328e-05	1951.52
40	10	1.335e-05	88.729	2.328e-05	1797.79
2 uM A1 RNA replicate 3	Lane	Area	Mean	Min	Max
Background	1	1.339e-05	4.966	2.328e-05	343.157		Time (min)	Uncut adjusted	Cut compared to adjusted RNA and Csx1 control
RNA	2	1.339e-05	118.493	2.328e-05	1831.09		5	105.877	0.14384
RNA+Csx1	3	1.339e-05	128.631	2.328e-05	2016.86		10	94.501	0.235831
5	4	1.339e-05	110.843	2.328e-05	2000		15	88.037	0.288101
10	5	1.339e-05	99.467	2.328e-05	1890.19		20	72.996	0.409728
15	6	1.339e-05	93.003	2.328e-05	1878.05		25	52.705	0.573808
20	7	1.339e-05	77.962	2.328e-05	1546.2		30	27.172	0.780277
25	8	1.339e-05	57.671	2.328e-05	1128.24		40	9.594	0.922419
30	9	1.339e-05	32.138	2.328e-05	1196.34
40	10	1.339e-05	14.56	2.328e-05	4274.36

## Sheet: Multiple turnover 5 uM RNA 
5 uM A1 RNA replicate 1	Lane	Area	Mean	Min	Max		Time (min)	Uncut adjusted	Cut compared to adjusted RNA and Csx1 control											Replicate 1	Rate from linear region
Background	1	1.561e-05	7.863	2.328e-05	934.733		30	169.14	0.274911											1	0.0085
RNA	2	1.561e-05	205.568	2.328e-05	2884.86		40	156.462	0.329261											2	0.0089
RNA+Csx1	3	1.561e-05	241.131	2.328e-05	3174.82		60	106.64	0.542843											3	0.0091
30	4	1.561e-05	177.003	2.328e-05	2917.61		70	99.912	0.571686
40	5	1.561e-05	164.325	2.328e-05	2549		80	88.599	0.620184
60	6	1.561e-05	114.503	2.328e-05	3685.42		100	63.686	0.726984
70	7	1.561e-05	107.775	2.328e-05	2268.71		120	51.908	0.777475
80	8	1.561e-05	96.462	2.328e-05	1471.23
100	9	1.561e-05	71.549	2.328e-05	3817.23
120	10	1.561e-05	59.771	2.328e-05	3524.92
5 uM A1 RNA replicate 2	Lane	Area	Mean	Min	Max		Time (min)	Uncut adjusted	Cut compared to adjusted RNA and Csx1 control
Background	1	1.298e-05	5.224	2.328e-05	530.667		30	146.077	0.331327
RNA	2	1.298e-05	163.524	2.328e-05	2517.91		40	143.021	0.345316
RNA+Csx1	3	1.298e-05	223.682	2.328e-05	2533.43		60	103.188	0.527653
30	4	1.298e-05	151.301	2.328e-05	1888.1		70	85.056	0.610653
40	5	1.298e-05	148.245	2.328e-05	1775.76		80	78.359	0.641309
60	6	1.298e-05	108.412	2.328e-05	1608.29		100	56.971	0.739213
70	7	1.298e-05	90.28	2.328e-05	1442.87		120	48.421	0.778351
80	8	1.298e-05	83.583	2.328e-05	1771.69
100	9	1.298e-05	62.195	2.328e-05	1375.49
120	10	1.298e-05	53.645	2.328e-05	1281.59
5 uM A1 RNA replicate 3	Lane	Area	Mean	Min	Max
Background	1	1.298e-05	5.327	2.328e-05	530.667		Time (min)	Uncut adjusted	Cut compared to adjusted RNA and Csx1 control
RNA	2	1.298e-05	240.945	2.328e-05	2449.61		30	186.049	0.304086
RNA+Csx1	3	1.298e-05	272.672	2.328e-05	2752.17		40	167.88	0.372047
30	4	1.298e-05	191.376	2.328e-05	2207.53		60	128.364	0.519856
40	5	1.298e-05	173.207	2.328e-05	2081.52		70	97.674	0.634652
60	6	1.298e-05	133.691	2.328e-05	1863.85		80	90.604	0.661097
70	7	1.298e-05	103.001	2.328e-05	1515.24		100	67.395	0.74791
80	8	1.298e-05	95.931	2.328e-05	1802.29		120	39.745	0.851334
100	9	1.298e-05	72.722	2.328e-05	1465.32
120	10	1.298e-05	45.072	2.328e-05	1276.41

## Sheet: Multiple turnover 10 uM RNA 
10 uM A1 RNA replicate 1	Lane	Area	Mean	Min	Max		Time (min)	Uncut adjusted	Cut compared to adjusted RNA and Csx1 control											Replicate 1	Rate from linear region
Background	1	1.388e-05	3.197	2.328e-05	779.227		40	73.06	0.254984											1	0.0045
RNA	2	1.388e-05	81.42	2.328e-05	2337.72		60	67.619	0.310468											2	0.0061
RNA+Csx1	3	1.388e-05	101.262	2.328e-05	1581.31		80	59.216	0.396156											3	0.0048
40	4	1.388e-05	76.257	2.328e-05	1984.49		100	51.549	0.474338
60	5	1.388e-05	70.816	2.328e-05	1552.66		120	47.063	0.520084
80	6	1.388e-05	62.413	2.328e-05	1233		140	39.666	0.595513
100	7	1.388e-05	54.746	2.328e-05	1578.62		160	29.215	0.702085
120	8	1.388e-05	50.26	2.328e-05	1082.99
140	9	1.388e-05	42.863	2.328e-05	1011.18
160	10	1.388e-05	32.412	2.328e-05	987.08
10 uM A1 RNA replicate 2	Lane	Area	Mean	Min	Max		Time (min)	Uncut adjusted	Cut compared to adjusted RNA and Csx1 control
Background	1	1.038e-05	6.11	2.328e-05	281.33		40	101.382	0.353312
RNA	2	1.038e-05	128.234	2.328e-05	1529.55		60	81.601	0.479489
RNA+Csx1	3	1.038e-05	162.881	2.328e-05	1905.75		80	66.091	0.578423
40	4	1.038e-05	107.492	2.328e-05	1463.47		100	52.858	0.662833
60	5	1.038e-05	87.711	2.328e-05	1483.1		120	41.851	0.733044
80	6	1.038e-05	72.201	2.328e-05	1244.55		140	26.852	0.828718
100	7	1.038e-05	58.968	2.328e-05	1162.53		160	24.992	0.840583
120	8	1.038e-05	47.961	2.328e-05	1361.92
140	9	1.038e-05	32.962	2.328e-05	1212.41
160	10	1.038e-05	31.102	2.328e-05	866.965
10 uM A1 RNA replicate 3	Lane	Area	Mean	Min	Max
Background	1	1.312e-05	2.074	2.328e-05	201.668		Time (min)	Uncut adjusted	Cut compared to adjusted RNA and Csx1 control
RNA	2	1.312e-05	156.854	2.328e-05	2233		40	131.864	0.223022
RNA+Csx1	3	1.312e-05	171.788	2.328e-05	2120.89		60	110.321	0.349959
40	4	1.312e-05	133.938	2.328e-05	2012.1		80	87.368	0.485205
60	5	1.312e-05	112.395	2.328e-05	1716.88		100	81.799	0.518019
80	6	1.312e-05	89.442	2.328e-05	1718.08		120	77.167	0.545312
100	7	1.312e-05	83.873	2.328e-05	1736.53		140	60.567	0.643123
120	8	1.312e-05	79.241	2.328e-05	1541.27		160	45.072	0.734424
140	9	1.312e-05	62.641	2.328e-05	1567.52
160	10	1.312e-05	47.146	2.328e-05	1125.64

## Sheet: Multiple turnover 20 uM RNA 
20 uM A1 RNA replicate 1	Lane	Area	Mean	Min	Max		Time (min)	Uncut adjusted	Cut compared to adjusted RNA and Csx1 control											Replicate 1	Rate from linear region
Background	1	1.546e-05	15.837	2.328e-05	2806.61		40	142.736	0.143432											1	0.0024
RNA	2	1.546e-05	145.877	2.328e-05	2637.46		60	141	0.153849											2	0.0022
RNA+Csx1	3	1.546e-05	182.474	2.328e-05	2517.91		80	130.447	0.217179											3	0.0033
40	4	1.546e-05	158.573	2.328e-05	2226.16		100	123.594	0.258304
60	5	1.546e-05	156.837	2.328e-05	2162.87		120	121.754	0.269346
80	6	1.546e-05	146.284	2.328e-05	1981.48		140	115.103	0.309259
100	7	1.546e-05	139.431	2.328e-05	1772.91		160	104.587	0.372366
120	8	1.546e-05	137.591	2.328e-05	1959.63
140	9	1.546e-05	130.94	2.328e-05	3516.33
160	10	1.546e-05	120.424	2.328e-05	1705.7
20 uM A1 RNA replicate 2	Lane	Area	Mean	Min	Max		Time (min)	Uncut adjusted	Cut compared to adjusted RNA and Csx1 control
Background	1	1.28e-05	79.603	2.328e-05	889.271		40	488.418	0.0793338
RNA	2	1.28e-05	519.674	2.328e-05	4271.84		60	462.729	0.127758
RNA+Csx1	3	1.28e-05	610.108	2.328e-05	5069.15		80	451.555	0.14882
40	4	1.28e-05	568.021	0.047	4781.34		100	418.543	0.211048
60	5	1.28e-05	542.332	0.024	4477.36		120	408.146	0.230646
80	6	1.28e-05	531.158	0.012	4696.96		140	360.789	0.319914
100	7	1.28e-05	498.146	2.328e-05	4301.54		160	333.893	0.370613
120	8	1.28e-05	487.749	2.328e-05	3841.72
140	9	1.28e-05	440.392	0.021	3382.01
160	10	1.28e-05	413.496	0.032	3181.9
20 uM A1 RNA replicate 3	Lane	Area	Mean	Min	Max
Background	1	8.627e-06	38.758	2.328e-05	798.744		Time (min)	Uncut adjusted	Cut compared to adjusted RNA and Csx1 control
RNA	2	8.627e-06	611.698	0.022	3743.06		40	549.265	0.174411
RNA+Csx1	3	8.627e-06	704.059	0.012	4198.36		60	521.586	0.216015
40	4	8.627e-06	588.023	0.114	4426.49		80	474.125	0.287353
60	5	8.627e-06	560.344	0.121	3388.75		100	442.728	0.334545
80	6	8.627e-06	512.883	2.328e-05	3931.97		120	396.883	0.403453
100	7	8.627e-06	481.486	0.039	4249.79		140	354.88	0.466587
120	8	8.627e-06	435.641	2.328e-05	3173.19		160	328.86	0.505697
140	9	8.627e-06	393.638	2.328e-05	3829.76
160	10	8.627e-06	367.618	2.328e-05	2717.85

## Sheet: Single turnover kinetics
SsoCsx1 ST replicate 1
Uncut RNA	Area	Mean	Min	Max			Time (min)	Uncut (background and area adjusted)	Fraction cut compared to RNA only control										Time (min)	R1	R2	R3	Average	SD
Background	1.82e-05	4.09	2.33e-05	252.181			RNA only cntrl (8)	560.722											0	0	0	0	0	0
RNA only cntrl	1.82e-05	564.812	2.33e-05	3950.75			RNA + protein no cA4 cntrl (8)	528.06											0.25	0.730565	0.880644	0.727519	0.779576	0.0875408
RNA + protein no cA4 cntrl	1.82e-05	532.15	0.022	3214.1			0.25	151.078	0.730565										0.5	0.81443	0.933345	0.823265	0.857013	0.0662525
0.25	1.82e-05	155.168	0.004	1023.18			0.5	104.053	0.81443										0.75	0.871664	0.95825	0.875501	0.901805	0.0489204
0.5	1.82e-05	108.143	2.33e-05	854.789			0.75	71.961	0.871664										1	0.9125	0.968387	0.91669	0.932526	0.0311274
0.75	1.82e-05	76.051	2.33e-05	612.762			1	49.063	0.9125										1.25	0.944147	0.975619	0.938314	0.952693	0.0200672
1	1.82e-05	53.153	2.33e-05	547.697			1.25	31.318	0.944147										1.5	0.950393	0.982649	0.950527	0.96119	0.0185846
1.25	1.82e-05	35.408	2.33e-05	395.615			1.5	27.816	0.950393										1.75	0.967635	0.987905	0.968629	0.974723	0.0114267
1.5	1.82e-05	31.906	2.33e-05	370.126			1.75	18.148	0.967635										2	0.976559	0.989715	0.970756	0.97901	0.00971407
1.75	1.82e-05	22.238	2.33e-05	293.271			2	13.144	0.976559										3	0.981991	0.991733	0.986903	0.986876	0.00487114
2	1.82e-05	17.234	2.33e-05	258.97			3	10.098	0.981991										4	0.994075	0.991973	0.990739	0.992263	0.00168682
3	1.82e-05	14.188	2.33e-05	271.861			4	3.322	0.994075										5	0.99402	0.999239	0.988748	0.994002	0.00524551
4	1.82e-05	7.412	2.33e-05	273.136			5	3.353	0.99402										6	0.994759	0.999276	0.995432	0.996489	0.00243695
5	1.82e-05	7.443	2.33e-05	241.268			6	2.939	0.994759										8	0.997742	0.999451	0.996708	0.997967	0.00138529
6	1.82e-05	7.029	2.33e-05	616.59			8	1.266	0.997742
8	1.82e-05	5.356	2.33e-05	322.213
SsoCsx1 ST replicate 2
Uncut RNA	Area	Mean	Min	Max			Time (min)	Uncut (background and area adjusted)	Fraction cut compared to RNA only control
Background	1.358e-05	5.345	2.328e-05	210.535			RNA only cntrl (8)	708.379
RNA only cntrl	1.358e-05	713.724	0.21	3330.02			RNA + protein no cA4 cntrl (8)	720.791
RNA + protein no cA4 cntrl	1.358e-05	726.136	0.252	3466.72			0.25	84.549	0.880644
0.25	1.358e-05	89.894	2.328e-05	925.021			0.5	47.217	0.933345
0.5	1.358e-05	52.562	2.328e-05	501.727			0.75	29.575	0.95825
0.75	1.358e-05	34.92	2.328e-05	354.876			1	22.394	0.968387
1	1.358e-05	27.739	2.328e-05	336.398			1.25	17.271	0.975619
1.25	1.358e-05	22.616	2.328e-05	1038.99			1.5	12.291	0.982649
1.5	1.358e-05	17.636	2.328e-05	282.302			1.75	8.568	0.987905
1.75	1.358e-05	13.913	2.328e-05	332.867			2	7.286	0.989715
2	1.358e-05	12.631	2.328e-05	883.524			3	5.856	0.991733
3	1.358e-05	11.201	2.328e-05	351.43			4	5.686	0.991973
4	1.358e-05	11.031	2.328e-05	782.463			5	0.539	0.999239
5	1.358e-05	5.884	2.328e-05	163.512			6	0.513	0.999276
6	1.358e-05	5.858	2.328e-05	244.879			8	0.389	0.999451
8	1.358e-05	5.734	2.328e-05	192.858
SsoCsx1 ST replicate 2
Uncut RNA	Area	Mean	Min	Max			Time (min)	Uncut (background and area adjusted)	Fraction cut compared to protein only control
Background	1.997e-05	2.15	2.328e-05	130.343			RNA only cntrl (8)	391.224
RNA only cntrl	1.997e-05	396.569	0.005	2671.76			RNA + protein no cA4 cntrl (8)	433.605
RNA + protein no cA4 cntrl	1.997e-05	435.755	0.009	2755.72			0.25	106.601	0.727519
0.25	1.997e-05	108.751	2.328e-05	907.494			0.5	69.143	0.823265
0.5	1.997e-05	71.293	2.328e-05	786.788			0.75	48.707	0.875501
0.75	1.997e-05	50.857	2.328e-05	602.296			1	32.593	0.91669
1	1.997e-05	34.743	2.328e-05	426.525			1.25	24.133	0.938314
1.25	1.997e-05	26.283	2.328e-05	362.737			1.5	19.355	0.950527
1.5	1.997e-05	21.505	2.328e-05	369.198			1.75	12.273	0.968629
1.75	1.997e-05	14.423	2.328e-05	282.302			2	11.441	0.970756
2	1.997e-05	13.591	2.328e-05	317.553			3	5.124	0.986903
3	1.997e-05	7.274	2.328e-05	452.008			4	3.623	0.990739
4	1.997e-05	5.773	2.328e-05	169.238			5	4.402	0.988748
5	1.997e-05	6.552	2.328e-05	193.798			6	1.787	0.995432
6	1.997e-05	3.937	2.328e-05	260.058			8	1.288	0.996708
8	1.997e-05	3.438	2.328e-05	218.735
