# Supplementary material for: The dynamic interplay of host and viral enzymes in type III CRISPR-mediated cyclic nucleotide signalling
Source: eLife. 2020 Apr 27;9:e55852. doi: 10.7554/eLife.55852 (PMC7213978; doi:10.7554/eLife.55852)
Supplement: Figure 6—source data 1. [file elife-55852-fig6-data1.xlsx]

## Sheet: varycA4_6-1Csx1-0Crn1-0Acr
Time	cA4	cleavedRNA	A2>P	cA4_Csx1 + cA4_Csx1_RNA
0	6	0	0	0
20	5.00013	8.35678	0	0.999868
40	5.00013	16.7133	0	0.999867
60	5.00013	25.0694	0	0.999866
80	5.00014	33.4252	0	0.999865
100	5.00014	41.7805	0	0.999864
120	5.00014	50.1355	0	0.999863
140	5.00014	58.4901	0	0.999861
160	5.00014	66.8443	0	0.99986
180	5.00014	75.198	0	0.999859
200	5.00014	83.5514	0	0.999858
220	5.00014	91.9043	0	0.999856
240	5.00015	100.257	0	0.999855
260	5.00015	108.609	0	0.999854
280	5.00015	116.96	0	0.999852
300	5.00015	125.312	0	0.999851
320	5.00015	133.662	0	0.999849
340	5.00015	142.013	0	0.999848
360	5.00015	150.362	0	0.999846
380	5.00016	158.711	0	0.999845
400	5.00016	167.06	0	0.999843
420	5.00016	175.408	0	0.999842
440	5.00016	183.756	0	0.99984
460	5.00016	192.103	0	0.999839
480	5.00016	200.45	0	0.999837
500	5.00016	208.796	0	0.999835
520	5.00017	217.141	0	0.999833
540	5.00017	225.486	0	0.999832
560	5.00017	233.831	0	0.99983
580	5.00017	242.174	0	0.999828
600	5.00017	250.517	0	0.999826
620	5.00018	258.86	0	0.999824
640	5.00018	267.202	0	0.999822
660	5.00018	275.543	0	0.99982
680	5.00018	283.883	0	0.999818
700	5.00018	292.223	0	0.999816
720	5.00019	300.562	0	0.999814
740	5.00019	308.9	0	0.999811
760	5.00019	317.238	0	0.999809
780	5.00019	325.575	0	0.999807
800	5.0002	333.911	0	0.999804
820	5.0002	342.246	0	0.999802
840	5.0002	350.58	0	0.999799
860	5.0002	358.914	0	0.999797
880	5.00021	367.247	0	0.999794
900	5.00021	375.578	0	0.999791
920	5.00021	383.909	0	0.999789
940	5.00021	392.239	0	0.999786
960	5.00022	400.568	0	0.999783
980	5.00022	408.896	0	0.99978
1000	5.00022	417.223	0	0.999777
1020	5.00023	425.549	0	0.999773
1040	5.00023	433.874	0	0.99977
1060	5.00023	442.198	0	0.999767
1080	5.00024	450.521	0	0.999763
1100	5.00024	458.842	0	0.99976
1120	5.00024	467.163	0	0.999756
1140	5.00025	475.482	0	0.999752
1160	5.00025	483.799	0	0.999748
1180	5.00026	492.116	0	0.999744
1200	5.00026	500.431	0	0.99974
1220	5.00026	508.744	0	0.999735
1240	5.00027	517.057	0	0.999731
1260	5.00027	525.367	0	0.999726
1280	5.00028	533.676	0	0.999721
1300	5.00028	541.984	0	0.999716
1320	5.00029	550.29	0	0.999711
1340	5.00029	558.594	0	0.999706
1360	5.0003	566.896	0	0.9997
1380	5.00031	575.197	0	0.999694
1400	5.00031	583.495	0	0.999688
1420	5.00032	591.791	0	0.999682
1440	5.00032	600.086	0	0.999676
1460	5.00033	608.378	0	0.999669
1480	5.00034	616.668	0	0.999662
1500	5.00035	624.955	0	0.999654
1520	5.00035	633.24	0	0.999647
1540	5.00036	641.523	0	0.999638
1560	5.00037	649.802	0	0.99963
1580	5.00038	658.079	0	0.999621
1600	5.00039	666.353	0	0.999612
1620	5.0004	674.624	0	0.999602
1640	5.00041	682.891	0	0.999592
1660	5.00042	691.155	0	0.999581
1680	5.00043	699.415	0	0.99957
1700	5.00044	707.672	0	0.999558
1720	5.00045	715.924	0	0.999545
1740	5.00047	724.172	0	0.999532
1760	5.00048	732.416	0	0.999518
1780	5.0005	740.655	0	0.999502
1800	5.00051	748.888	0	0.999486
1820	5.00053	757.117	0	0.999469
1840	5.00055	765.339	0	0.999451
1860	5.00057	773.555	0	0.999431
1880	5.00059	781.765	0	0.999411
1900	5.00061	789.967	0	0.999388
1920	5.00064	798.162	0	0.999364
1940	5.00066	806.348	0	0.999337
1960	5.00069	814.525	0	0.999309
1980	5.00072	822.693	0	0.999278
2000	5.00076	830.85	0	0.999244
2020	5.00079	838.995	0	0.999206
2040	5.00083	847.127	0	0.999165
2060	5.00088	855.245	0	0.99912
2080	5.00093	863.347	0	0.999069
2100	5.00099	871.432	0	0.999012
2120	5.00105	879.496	0	0.998949
2140	5.00112	887.539	0	0.998876
2160	5.00121	895.556	0	0.998793
2180	5.0013	903.543	0	0.998698
2200	5.00141	911.497	0	0.998586
2220	5.00155	919.41	0	0.998454
2240	5.0017	927.276	0	0.998296
2260	5.0019	935.085	0	0.998104
2280	5.00213	942.823	0	0.997865
2300	5.00244	950.473	0	0.997562
2320	5.00283	958.008	0	0.997166
2340	5.00337	965.392	0	0.99663
2360	5.00413	972.565	0	0.995872
2380	5.00526	979.433	0	0.994742
2400	5.00705	985.83	0	0.992954
2420	5.01001	991.461	0	0.989986
2440	5.01472	995.831	0	0.985282
2460	5.02017	998.453	0	0.979831
2480	5.02363	999.542	0	0.97637
2500	5.02491	999.878	0	0.975089
2520	5.02528	999.969	0	0.974724
2540	5.02537	999.992	0	0.974628
2560	5.0254	999.998	0	0.974603
2580	5.0254	999.999	0	0.974597
2600	5.0254	1000	0	0.974595
2620	5.02541	1000	0	0.974595
2640	5.02541	1000	0	0.974595
2660	5.02541	1000	0	0.974595
2680	5.02541	1000	0	0.974595
2700	5.02541	1000	0	0.974595
2720	5.02541	1000	0	0.974595
2740	5.02541	1000	0	0.974595
2760	5.02541	1000	0	0.974595
2780	5.02541	1000	0	0.974595
2800	5.02541	1000	0	0.974595
2820	5.02541	1000	0	0.974595
2840	5.02541	1000	0	0.974595
2860	5.02541	1000	0	0.974595
2880	5.02541	1000	0	0.974595
2900	5.02541	1000	0	0.974595
2920	5.02541	1000	0	0.974595
2940	5.02541	1000	0	0.974595
2960	5.02541	1000	0	0.974595
2980	5.02541	1000	0	0.974595
3000	5.02541	1000	0	0.974595
3020	5.02541	1000	0	0.974595
3040	5.02541	1000	0	0.974595
3060	5.02541	1000	0	0.974595
3080	5.02541	1000	0	0.974595
3100	5.02541	1000	0	0.974595
3120	5.02541	1000	0	0.974595
3140	5.02541	1000	0	0.974595
3160	5.02541	1000	0	0.974595
3180	5.02541	1000	0	0.974595
3200	5.02541	1000	0	0.974595
3220	5.02541	1000	0	0.974595
3240	5.02541	1000	0	0.974595
3260	5.02541	1000	0	0.974595
3280	5.02541	1000	0	0.974595
3300	5.02541	1000	0	0.974595
3320	5.02541	1000	0	0.974595
3340	5.02541	1000	0	0.974595
3360	5.02541	1000	0	0.974595
3380	5.02541	1000	0	0.974595
3400	5.02541	1000	0	0.974595
3420	5.02541	1000	0	0.974595
3440	5.02541	1000	0	0.974595
3460	5.02541	1000	0	0.974595
3480	5.02541	1000	0	0.974595
3500	5.02541	1000	0	0.974595
3520	5.02541	1000	0	0.974595
3540	5.02541	1000	0	0.974595
3560	5.02541	1000	0	0.974595
3580	5.02541	1000	0	0.974595
3600	5.02541	1000	0	0.974595
3620	5.02541	1000	0	0.974595
3640	5.02541	1000	0	0.974595
3660	5.02541	1000	0	0.974595
3680	5.02541	1000	0	0.974595
3700	5.02541	1000	0	0.974595
3720	5.02541	1000	0	0.974595
3740	5.02541	1000	0	0.974595
3760	5.02541	1000	0	0.974595
3780	5.02541	1000	0	0.974595
3800	5.02541	1000	0	0.974595
3820	5.02541	1000	0	0.974595
3840	5.02541	1000	0	0.974595
3860	5.02541	1000	0	0.974595
3880	5.02541	1000	0	0.974595
3900	5.02541	1000	0	0.974595
3920	5.02541	1000	0	0.974595
3940	5.02541	1000	0	0.974595
3960	5.02541	1000	0	0.974595
3980	5.02541	1000	0	0.974595
4000	5.02541	1000	0	0.974595

## Sheet: varycA4_60-1Csx1-0Crn1-0Acr
Time	cA4	cleavedRNA	A2>P	cA4_Csx1 + cA4_Csx1_RNA
0	60	0	0	0
20	59	8.35785	0	0.999989
40	59	16.7154	0	0.999989
60	59	25.0725	0	0.999989
80	59	33.4293	0	0.999989
100	59	41.7857	0	0.999988
120	59	50.1417	0	0.999988
140	59	58.4974	0	0.999988
160	59	66.8526	0	0.999988
180	59	75.2075	0	0.999988
200	59	83.5619	0	0.999988
220	59	91.9159	0	0.999988
240	59	100.27	0	0.999988
260	59	108.623	0	0.999988
280	59	116.975	0	0.999987
300	59	125.328	0	0.999987
320	59	133.68	0	0.999987
340	59	142.031	0	0.999987
360	59	150.382	0	0.999987
380	59	158.732	0	0.999987
400	59	167.082	0	0.999987
420	59	175.431	0	0.999987
440	59	183.78	0	0.999986
460	59	192.129	0	0.999986
480	59	200.477	0	0.999986
500	59	208.824	0	0.999986
520	59	217.171	0	0.999986
540	59	225.517	0	0.999986
560	59	233.862	0	0.999986
580	59	242.207	0	0.999985
600	59	250.552	0	0.999985
620	59	258.896	0	0.999985
640	59	267.239	0	0.999985
660	59	275.581	0	0.999985
680	59	283.923	0	0.999985
700	59	292.264	0	0.999984
720	59	300.605	0	0.999984
740	59	308.944	0	0.999984
760	59	317.283	0	0.999984
780	59	325.622	0	0.999984
800	59	333.959	0	0.999983
820	59	342.296	0	0.999983
840	59	350.632	0	0.999983
860	59	358.967	0	0.999983
880	59	367.301	0	0.999983
900	59	375.635	0	0.999982
920	59	383.967	0	0.999982
940	59	392.299	0	0.999982
960	59	400.629	0	0.999982
980	59	408.959	0	0.999981
1000	59	417.288	0	0.999981
1020	59	425.616	0	0.999981
1040	59	433.942	0	0.999981
1060	59	442.268	0	0.99998
1080	59	450.592	0	0.99998
1100	59	458.915	0	0.99998
1120	59	467.238	0	0.999979
1140	59	475.558	0	0.999979
1160	59	483.878	0	0.999979
1180	59	492.196	0	0.999978
1200	59	500.513	0	0.999978
1220	59	508.829	0	0.999978
1240	59	517.143	0	0.999977
1260	59	525.456	0	0.999977
1280	59	533.767	0	0.999976
1300	59	542.077	0	0.999976
1320	59	550.385	0	0.999976
1340	59	558.691	0	0.999975
1360	59	566.996	0	0.999975
1380	59	575.298	0	0.999974
1400	59	583.599	0	0.999974
1420	59	591.898	0	0.999973
1440	59	600.195	0	0.999972
1460	59	608.489	0	0.999972
1480	59	616.782	0	0.999971
1500	59	625.072	0	0.999971
1520	59	633.359	0	0.99997
1540	59	641.644	0	0.999969
1560	59	649.927	0	0.999969
1580	59	658.206	0	0.999968
1600	59	666.483	0	0.999967
1620	59	674.757	0	0.999966
1640	59	683.027	0	0.999965
1660	59	691.294	0	0.999964
1680	59	699.557	0	0.999964
1700	59	707.817	0	0.999962
1720	59	716.073	0	0.999961
1740	59	724.325	0	0.99996
1760	59	732.572	0	0.999959
1780	59	740.814	0	0.999958
1800	59	749.051	0	0.999956
1820	59	757.284	0	0.999955
1840	59	765.51	0	0.999953
1860	59	773.73	0	0.999952
1880	59.0001	781.944	0	0.99995
1900	59.0001	790.151	0	0.999948
1920	59.0001	798.35	0	0.999946
1940	59.0001	806.541	0	0.999944
1960	59.0001	814.723	0	0.999941
1980	59.0001	822.895	0	0.999939
2000	59.0001	831.057	0	0.999936
2020	59.0001	839.208	0	0.999933
2040	59.0001	847.346	0	0.999929
2060	59.0001	855.47	0	0.999925
2080	59.0001	863.578	0	0.999921
2100	59.0001	871.669	0	0.999916
2120	59.0001	879.741	0	0.999911
2140	59.0001	887.791	0	0.999904
2160	59.0001	895.815	0	0.999897
2180	59.0001	903.811	0	0.999889
2200	59.0001	911.773	0	0.99988
2220	59.0001	919.696	0	0.999868
2240	59.0001	927.572	0	0.999855
2260	59.0002	935.391	0	0.999838
2280	59.0002	943.14	0	0.999818
2300	59.0002	950.801	0	0.999792
2320	59.0002	958.349	0	0.999757
2340	59.0003	965.745	0	0.999711
2360	59.0004	972.931	0	0.999644
2380	59.0005	979.807	0	0.999545
2400	59.0006	986.205	0	0.999386
2420	59.0009	991.813	0	0.999118
2440	59.0013	996.111	0	0.998692
2460	59.0018	998.613	0	0.998211
2480	59.0021	999.605	0	0.997923
2500	59.0022	999.898	0	0.997822
2520	59.0022	999.975	0	0.997794
2540	59.0022	999.994	0	0.997787
2560	59.0022	999.998	0	0.997785
2580	59.0022	1000	0	0.997785
2600	59.0022	1000	0	0.997785
2620	59.0022	1000	0	0.997785
2640	59.0022	1000	0	0.997785
2660	59.0022	1000	0	0.997785
2680	59.0022	1000	0	0.997785
2700	59.0022	1000	0	0.997785
2720	59.0022	1000	0	0.997785
2740	59.0022	1000	0	0.997785
2760	59.0022	1000	0	0.997785
2780	59.0022	1000	0	0.997785
2800	59.0022	1000	0	0.997785
2820	59.0022	1000	0	0.997785
2840	59.0022	1000	0	0.997785
2860	59.0022	1000	0	0.997785
2880	59.0022	1000	0	0.997785
2900	59.0022	1000	0	0.997785
2920	59.0022	1000	0	0.997785
2940	59.0022	1000	0	0.997785
2960	59.0022	1000	0	0.997785
2980	59.0022	1000	0	0.997785
3000	59.0022	1000	0	0.997785
3020	59.0022	1000	0	0.997785
3040	59.0022	1000	0	0.997785
3060	59.0022	1000	0	0.997785
3080	59.0022	1000	0	0.997785
3100	59.0022	1000	0	0.997785
3120	59.0022	1000	0	0.997785
3140	59.0022	1000	0	0.997785
3160	59.0022	1000	0	0.997785
3180	59.0022	1000	0	0.997785
3200	59.0022	1000	0	0.997785
3220	59.0022	1000	0	0.997785
3240	59.0022	1000	0	0.997785
3260	59.0022	1000	0	0.997785
3280	59.0022	1000	0	0.997785
3300	59.0022	1000	0	0.997785
3320	59.0022	1000	0	0.997785
3340	59.0022	1000	0	0.997785
3360	59.0022	1000	0	0.997785
3380	59.0022	1000	0	0.997785
3400	59.0022	1000	0	0.997785
3420	59.0022	1000	0	0.997785
3440	59.0022	1000	0	0.997785
3460	59.0022	1000	0	0.997785
3480	59.0022	1000	0	0.997785
3500	59.0022	1000	0	0.997785
3520	59.0022	1000	0	0.997785
3540	59.0022	1000	0	0.997785
3560	59.0022	1000	0	0.997785
3580	59.0022	1000	0	0.997785
3600	59.0022	1000	0	0.997785
3620	59.0022	1000	0	0.997785
3640	59.0022	1000	0	0.997785
3660	59.0022	1000	0	0.997785
3680	59.0022	1000	0	0.997785
3700	59.0022	1000	0	0.997785
3720	59.0022	1000	0	0.997785
3740	59.0022	1000	0	0.997785
3760	59.0022	1000	0	0.997785
3780	59.0022	1000	0	0.997785
3800	59.0022	1000	0	0.997785
3820	59.0022	1000	0	0.997785
3840	59.0022	1000	0	0.997785
3860	59.0022	1000	0	0.997785
3880	59.0022	1000	0	0.997785
3900	59.0022	1000	0	0.997785
3920	59.0022	1000	0	0.997785
3940	59.0022	1000	0	0.997785
3960	59.0022	1000	0	0.997785
3980	59.0022	1000	0	0.997785
4000	59.0022	1000	0	0.997785

## Sheet: varycA4_600-1Csx1-0Crn1-0Acr
Time	cA4	cleavedRNA	A2>P	cA4_Csx1 + cA4_Csx1_RNA
0	600	0	0	0
20	599	8.35794	0	0.999999
40	599	16.7155	0	0.999999
60	599	25.0728	0	0.999999
80	599	33.4296	0	0.999999
100	599	41.7861	0	0.999999
120	599	50.1422	0	0.999999
140	599	58.498	0	0.999999
160	599	66.8533	0	0.999999
180	599	75.2082	0	0.999999
200	599	83.5628	0	0.999999
220	599	91.9169	0	0.999999
240	599	100.271	0	0.999999
260	599	108.624	0	0.999999
280	599	116.977	0	0.999999
300	599	125.329	0	0.999999
320	599	133.681	0	0.999999
340	599	142.032	0	0.999999
360	599	150.383	0	0.999999
380	599	158.734	0	0.999999
400	599	167.084	0	0.999999
420	599	175.433	0	0.999999
440	599	183.782	0	0.999999
460	599	192.131	0	0.999999
480	599	200.479	0	0.999999
500	599	208.826	0	0.999999
520	599	217.173	0	0.999999
540	599	225.519	0	0.999999
560	599	233.865	0	0.999999
580	599	242.21	0	0.999999
600	599	250.555	0	0.999999
620	599	258.899	0	0.999999
640	599	267.242	0	0.999999
660	599	275.584	0	0.999998
680	599	283.926	0	0.999998
700	599	292.268	0	0.999998
720	599	300.608	0	0.999998
740	599	308.948	0	0.999998
760	599	317.287	0	0.999998
780	599	325.626	0	0.999998
800	599	333.963	0	0.999998
820	599	342.3	0	0.999998
840	599	350.636	0	0.999998
860	599	358.971	0	0.999998
880	599	367.306	0	0.999998
900	599	375.639	0	0.999998
920	599	383.972	0	0.999998
940	599	392.304	0	0.999998
960	599	400.635	0	0.999998
980	599	408.964	0	0.999998
1000	599	417.293	0	0.999998
1020	599	425.621	0	0.999998
1040	599	433.948	0	0.999998
1060	599	442.274	0	0.999998
1080	599	450.598	0	0.999998
1100	599	458.922	0	0.999998
1120	599	467.244	0	0.999998
1140	599	475.565	0	0.999998
1160	599	483.885	0	0.999998
1180	599	492.203	0	0.999998
1200	599	500.52	0	0.999998
1220	599	508.836	0	0.999998
1240	599	517.151	0	0.999998
1260	599	525.463	0	0.999998
1280	599	533.775	0	0.999998
1300	599	542.085	0	0.999998
1320	599	550.393	0	0.999998
1340	599	558.699	0	0.999998
1360	599	567.004	0	0.999997
1380	599	575.307	0	0.999997
1400	599	583.608	0	0.999997
1420	599	591.907	0	0.999997
1440	599	600.204	0	0.999997
1460	599	608.498	0	0.999997
1480	599	616.791	0	0.999997
1500	599	625.081	0	0.999997
1520	599	633.369	0	0.999997
1540	599	641.654	0	0.999997
1560	599	649.937	0	0.999997
1580	599	658.217	0	0.999997
1600	599	666.494	0	0.999997
1620	599	674.768	0	0.999997
1640	599	683.038	0	0.999997
1660	599	691.306	0	0.999997
1680	599	699.569	0	0.999996
1700	599	707.829	0	0.999996
1720	599	716.085	0	0.999996
1740	599	724.337	0	0.999996
1760	599	732.585	0	0.999996
1780	599	740.827	0	0.999996
1800	599	749.065	0	0.999996
1820	599	757.297	0	0.999996
1840	599	765.524	0	0.999995
1860	599	773.745	0	0.999995
1880	599	781.959	0	0.999995
1900	599	790.166	0	0.999995
1920	599	798.365	0	0.999995
1940	599	806.557	0	0.999994
1960	599	814.739	0	0.999994
1980	599	822.912	0	0.999994
2000	599	831.075	0	0.999994
2020	599	839.226	0	0.999993
2040	599	847.364	0	0.999993
2060	599	855.489	0	0.999993
2080	599	863.598	0	0.999992
2100	599	871.689	0	0.999992
2120	599	879.761	0	0.999991
2140	599	887.812	0	0.999991
2160	599	895.837	0	0.99999
2180	599	903.833	0	0.999989
2200	599	911.796	0	0.999988
2220	599	919.72	0	0.999987
2240	599	927.596	0	0.999986
2260	599	935.416	0	0.999984
2280	599	943.167	0	0.999982
2300	599	950.829	0	0.999979
2320	599	958.378	0	0.999976
2340	599	965.775	0	0.999971
2360	599	972.961	0	0.999965
2380	599	979.839	0	0.999955
2400	599	986.236	0	0.999939
2420	599	991.842	0	0.999913
2440	599	996.135	0	0.999871
2460	599	998.626	0	0.999823
2480	599	999.61	0	0.999795
2500	599	999.9	0	0.999785
2520	599	999.975	0	0.999782
2540	599	999.994	0	0.999782
2560	599	999.998	0	0.999781
2580	599	1000	0	0.999781
2600	599	1000	0	0.999781
2620	599	1000	0	0.999781
2640	599	1000	0	0.999781
2660	599	1000	0	0.999781
2680	599	1000	0	0.999781
2700	599	1000	0	0.999781
2720	599	1000	0	0.999781
2740	599	1000	0	0.999781
2760	599	1000	0	0.999781
2780	599	1000	0	0.999781
2800	599	1000	0	0.999781
2820	599	1000	0	0.999781
2840	599	1000	0	0.999781
2860	599	1000	0	0.999781
2880	599	1000	0	0.999781
2900	599	1000	0	0.999781
2920	599	1000	0	0.999781
2940	599	1000	0	0.999781
2960	599	1000	0	0.999781
2980	599	1000	0	0.999781
3000	599	1000	0	0.999781
3020	599	1000	0	0.999781
3040	599	1000	0	0.999781
3060	599	1000	0	0.999781
3080	599	1000	0	0.999781
3100	599	1000	0	0.999781
3120	599	1000	0	0.999781
3140	599	1000	0	0.999781
3160	599	1000	0	0.999781
3180	599	1000	0	0.999781
3200	599	1000	0	0.999781
3220	599	1000	0	0.999781
3240	599	1000	0	0.999781
3260	599	1000	0	0.999781
3280	599	1000	0	0.999781
3300	599	1000	0	0.999781
3320	599	1000	0	0.999781
3340	599	1000	0	0.999781
3360	599	1000	0	0.999781
3380	599	1000	0	0.999781
3400	599	1000	0	0.999781
3420	599	1000	0	0.999781
3440	599	1000	0	0.999781
3460	599	1000	0	0.999781
3480	599	1000	0	0.999781
3500	599	1000	0	0.999781
3520	599	1000	0	0.999781
3540	599	1000	0	0.999781
3560	599	1000	0	0.999781
3580	599	1000	0	0.999781
3600	599	1000	0	0.999781
3620	599	1000	0	0.999781
3640	599	1000	0	0.999781
3660	599	1000	0	0.999781
3680	599	1000	0	0.999781
3700	599	1000	0	0.999781
3720	599	1000	0	0.999781
3740	599	1000	0	0.999781
3760	599	1000	0	0.999781
3780	599	1000	0	0.999781
3800	599	1000	0	0.999781
3820	599	1000	0	0.999781
3840	599	1000	0	0.999781
3860	599	1000	0	0.999781
3880	599	1000	0	0.999781
3900	599	1000	0	0.999781
3920	599	1000	0	0.999781
3940	599	1000	0	0.999781
3960	599	1000	0	0.999781
3980	599	1000	0	0.999781
4000	599	1000	0	0.999781

## Sheet: varycA4_6-1Csx1-1Crn1-0Acr
Time	cA4	cleavedRNA	A2>P	cA4_Csx1 + cA4_Csx1_RNA
0	6	0	0	0
20	0.00279818	7.9824	5.13293	0.814576
40	0.00095851	13.7514	5.38559	0.59611
60	0.000598651	18.2025	5.51082	0.477695
80	0.000431641	21.8356	5.59568	0.396024
100	0.000332183	24.8772	5.65912	0.334487
120	0.000265526	27.4621	5.70897	0.285911
140	0.000217458	29.6812	5.74936	0.246446
160	0.000181225	31.6	5.78275	0.21375
180	0.000152902	33.2682	5.81077	0.186279
200	0.000130233	34.7248	5.83453	0.162953
220	0.000111774	36.001	5.85486	0.142982
240	9.65136e-05	37.1222	5.87236	0.125773
260	8.37477e-05	38.1095	5.88752	0.110865
280	7.29672e-05	38.9805	5.9007	0.0978948
300	6.37909e-05	39.7502	5.9122	0.08657
320	5.59232e-05	40.4312	5.92227	0.0766519
340	4.91367e-05	41.0346	5.93111	0.0679437
360	4.32678e-05	41.5697	5.93888	0.0602811
380	3.81688e-05	42.0446	5.94574	0.053526
400	3.37169e-05	42.4665	5.95179	0.0475615
420	2.98309e-05	42.8414	5.95714	0.0422875
440	2.64177e-05	43.1749	5.96187	0.0376186
460	2.34185e-05	43.4716	5.96607	0.0334811
480	2.07843e-05	43.7357	5.96979	0.0298109
500	1.84479e-05	43.9709	5.97309	0.0265528
520	1.64019e-05	44.1805	5.97602	0.0236584
540	1.45741e-05	44.3672	5.97863	0.0210855
560	1.29741e-05	44.5337	5.98095	0.0187972
580	1.15378e-05	44.6821	5.98302	0.0167609
600	1.02821e-05	44.8144	5.98485	0.0149482
620	9.14882e-06	44.9325	5.98649	0.0133339
640	8.15986e-06	45.0378	5.98795	0.0118958
660	7.26671e-06	45.1317	5.98925	0.0106142
680	6.4808e-06	45.2155	5.9904	0.00947188
700	5.78039e-06	45.2903	5.99143	0.00845342
720	5.14952e-06	45.3571	5.99236	0.00754522
740	4.59999e-06	45.4167	5.99318	0.00673516
760	4.09942e-06	45.4699	5.99391	0.00601254
780	3.65806e-06	45.5174	5.99456	0.00536782
800	3.26832e-06	45.5598	5.99514	0.00479252
820	2.91164e-06	45.5977	5.99566	0.00427912
840	2.60073e-06	45.6315	5.99613	0.0038209
860	2.3245e-06	45.6617	5.99654	0.0034119
880	2.07125e-06	45.6886	5.99691	0.0030468
900	1.84942e-06	45.7127	5.99724	0.00272086
920	1.65434e-06	45.7342	5.99754	0.00242986
940	1.47576e-06	45.7534	5.9978	0.00217005
960	1.31524e-06	45.7705	5.99804	0.00193807
980	1.17693e-06	45.7859	5.99825	0.00173092
1000	1.05219e-06	45.7995	5.99843	0.00154594
1020	9.37599e-07	45.8117	5.9986	0.00138076
1040	8.36426e-07	45.8227	5.99875	0.00123325
1060	7.48828e-07	45.8324	5.99888	0.00110151
1080	6.69615e-07	45.8411	5.999	0.000983856
1100	5.96836e-07	45.8489	5.99911	0.00087878
1120	5.31839e-07	45.8558	5.9992	0.000784932
1140	4.76022e-07	45.862	5.99929	0.000701115
1160	4.26197e-07	45.8676	5.99937	0.000626255
1180	3.80627e-07	45.8725	5.99943	0.000559392
1200	3.38806e-07	45.8769	5.99949	0.000499669
1220	3.0224e-07	45.8809	5.99955	0.000446324
1240	2.70635e-07	45.8844	5.9996	0.00039868
1260	2.42398e-07	45.8876	5.99964	0.000356124
1280	2.16635e-07	45.8904	5.99968	0.000318113
1300	1.92975e-07	45.8929	5.99971	0.000284157
1320	1.71735e-07	45.8951	5.99974	0.000253826
1340	1.53527e-07	45.8971	5.99977	0.000226735
1360	1.37561e-07	45.8989	5.99979	0.000202538
1380	1.23229e-07	45.9005	5.99982	0.000180926
1400	1.10159e-07	45.9019	5.99984	0.000161619
1420	9.81647e-08	45.9032	5.99985	0.000144372
1440	8.72568e-08	45.9044	5.99987	0.000128964
1460	7.7837e-08	45.9054	5.99988	0.000115201
1480	6.96668e-08	45.9063	5.9999	0.000102909
1500	6.24479e-08	45.9071	5.99991	9.19304e-05
1520	5.59633e-08	45.9078	5.99992	8.21248e-05
1540	5.00647e-08	45.9085	5.99993	7.33652e-05
1560	4.46609e-08	45.9091	5.99993	6.5539e-05
1580	3.97056e-08	45.9096	5.99994	5.85458e-05
1600	3.52969e-08	45.91	5.99995	5.22976e-05
1620	3.14949e-08	45.9105	5.99995	4.67171e-05
1640	2.8182e-08	45.9108	5.99996	4.1734e-05
1660	2.52615e-08	45.9112	5.99996	3.72844e-05
1680	2.26566e-08	45.9114	5.99997	3.33108e-05
1700	2.03079e-08	45.9117	5.99997	2.97615e-05
1720	1.8171e-08	45.9119	5.99997	2.65905e-05
1740	1.62151e-08	45.9122	5.99998	2.37565e-05
1760	1.44202e-08	45.9123	5.99998	2.1223e-05
1780	1.27942e-08	45.9125	5.99998	1.8958e-05
1800	1.13796e-08	45.9127	5.99998	1.69343e-05
1820	1.01489e-08	45.9128	5.99998	1.51273e-05
1840	9.07324e-09	45.9129	5.99999	1.35144e-05
1860	8.12776e-09	45.913	5.99999	1.2075e-05
1880	7.29107e-09	45.9131	5.99999	1.07905e-05
1900	6.54508e-09	45.9132	5.99999	9.64396e-06
1920	5.87474e-09	45.9133	5.99999	8.62012e-06
1940	5.26777e-09	45.9133	5.99999	7.70535e-06
1960	4.71439e-09	45.9134	5.99999	6.88745e-06
1980	4.20701e-09	45.9135	5.99999	6.15562e-06
2000	3.74003e-09	45.9135	5.99999	5.50029e-06
2020	3.31334e-09	45.9136	6	4.91319e-06
2040	2.93762e-09	45.9136	6	4.38777e-06
2060	2.60844e-09	45.9136	6	3.9182e-06
2080	2.32026e-09	45.9137	6	3.49909e-06
2100	2.06802e-09	45.9137	6	3.12539e-06
2120	1.8471e-09	45.9137	6	2.79247e-06
2140	1.65334e-09	45.9137	6	2.49605e-06
2160	1.48297e-09	45.9137	6	2.23219e-06
2180	1.33263e-09	45.9138	6	1.9973e-06
2200	1.19934e-09	45.9138	6	1.78808e-06
2220	1.08047e-09	45.9138	6	1.60157e-06
2240	9.73715e-10	45.9138	6	1.43508e-06
2260	8.771e-10	45.9138	6	1.28619e-06
2280	7.88934e-10	45.9138	6	1.15275e-06
2300	7.07803e-10	45.9138	6	1.03284e-06
2320	6.32545e-10	45.9138	6	9.24783e-07
2340	5.6223e-10	45.9139	6	8.27105e-07
2360	4.96988e-10	45.9139	6	7.38667e-07
2380	4.38604e-10	45.9139	6	6.58915e-07
2400	3.86652e-10	45.9139	6	5.872e-07
2420	3.4059e-10	45.9139	6	5.22887e-07
2440	2.99903e-10	45.9139	6	4.65375e-07
2460	2.64104e-10	45.9139	6	4.14091e-07
2480	2.32735e-10	45.9139	6	3.68493e-07
2500	2.05361e-10	45.9139	6	3.28071e-07
2520	1.81574e-10	45.9139	6	2.92339e-07
2540	1.60989e-10	45.9139	6	2.60843e-07
2560	1.43246e-10	45.9139	6	2.33153e-07
2580	1.2801e-10	45.9139	6	2.08867e-07
2600	1.14967e-10	45.9139	6	1.87609e-07
2620	1.03824e-10	45.9139	6	1.69027e-07
2640	9.43117e-11	45.9139	6	1.52793e-07
2660	8.61801e-11	45.9139	6	1.38604e-07
2680	7.91998e-11	45.9139	6	1.26179e-07
2700	7.31606e-11	45.9139	6	1.15259e-07
2720	6.7871e-11	45.9139	6	1.05605e-07
2740	6.31577e-11	45.9139	6	9.70006e-08
2760	5.88648e-11	45.9139	6	8.92485e-08
2780	5.4853e-11	45.9139	6	8.21704e-08
2800	5.09993e-11	45.9139	6	7.56066e-08
2820	4.71961e-11	45.9139	6	6.94149e-08
2840	4.33504e-11	45.9139	6	6.34701e-08
2860	3.93835e-11	45.9139	6	5.76634e-08
2880	3.523e-11	45.9139	6	5.19012e-08
2900	3.11941e-11	45.9139	6	4.64324e-08
2920	2.7794e-11	45.9139	6	4.17139e-08
2940	2.49711e-11	45.9139	6	3.76806e-08
2960	2.26626e-11	45.9139	6	3.42642e-08
2980	2.08097e-11	45.9139	6	3.14005e-08
3000	1.93575e-11	45.9139	6	2.90292e-08
3020	1.82546e-11	45.9139	6	2.70937e-08
3040	1.74534e-11	45.9139	6	2.55411e-08
3060	1.69094e-11	45.9139	6	2.43221e-08
3080	1.65819e-11	45.9139	6	2.3391e-08
3100	1.64332e-11	45.9139	6	2.27053e-08
3120	1.64287e-11	45.9139	6	2.22257e-08
3140	1.65369e-11	45.9139	6	2.19163e-08
3160	1.67291e-11	45.9139	6	2.17439e-08
3180	1.69797e-11	45.9139	6	2.16784e-08
3200	1.72653e-11	45.9139	6	2.16927e-08
3220	1.75656e-11	45.9139	6	2.17619e-08
3240	1.78623e-11	45.9139	6	2.18643e-08
3260	1.81397e-11	45.9139	6	2.19802e-08
3280	1.83844e-11	45.9139	6	2.20925e-08
3300	1.85849e-11	45.9139	6	2.21864e-08
3320	1.87318e-11	45.9139	6	2.22492e-08
3340	1.88177e-11	45.9139	6	2.22701e-08
3360	1.88369e-11	45.9139	6	2.22405e-08
3380	1.87854e-11	45.9139	6	2.21535e-08
3400	1.86608e-11	45.9139	6	2.2004e-08
3420	1.84621e-11	45.9139	6	2.17883e-08
3440	1.81897e-11	45.9139	6	2.15045e-08
3460	1.78451e-11	45.9139	6	2.11519e-08
3480	1.74311e-11	45.9139	6	2.07311e-08
3500	1.69515e-11	45.9139	6	2.02439e-08
3520	1.64109e-11	45.9139	6	1.96933e-08
3540	1.58146e-11	45.9139	6	1.9083e-08
3560	1.51689e-11	45.9139	6	1.84178e-08
3580	1.44803e-11	45.9139	6	1.77031e-08
3600	1.3756e-11	45.9139	6	1.69449e-08
3620	1.30034e-11	45.9139	6	1.61498e-08
3640	1.22303e-11	45.9139	6	1.53248e-08
3660	1.14444e-11	45.9139	6	1.44772e-08
3680	1.06534e-11	45.9139	6	1.36145e-08
3700	9.86525e-12	45.9139	6	1.27443e-08
3720	9.08728e-12	45.9139	6	1.18741e-08
3740	8.32668e-12	45.9139	6	1.10114e-08
3760	7.59016e-12	45.9139	6	1.01633e-08
3780	6.8839e-12	45.9139	6	9.3366e-09
3800	6.21339e-12	45.9139	6	8.53774e-09
3820	5.58335e-12	45.9139	6	7.77249e-09
3840	4.99764e-12	45.9139	6	7.04596e-09
3860	4.45907e-12	45.9139	6	6.36248e-09
3880	3.9694e-12	45.9139	6	5.72549e-09
3900	3.52913e-12	45.9139	6	5.1374e-09
3920	3.13742e-12	45.9139	6	4.59952e-09
3940	2.79203e-12	45.9139	6	4.11195e-09
3960	2.49932e-12	45.9139	6	3.68707e-09
3980	2.24315e-12	45.9139	6	3.30915e-09
4000	1.98697e-12	45.9139	6	2.93123e-09

## Sheet: varycA4_60-1Csx1-1Crn1-0Acr
Time	cA4	cleavedRNA	A2>P	cA4_Csx1 + cA4_Csx1_RNA
0	60	0	0	0
20	48.7758	8.35784	9.1905	1.00391
40	39.5996	16.7153	18.3791	1.00254
60	30.3221	25.0724	27.5647	1.01296
80	21.156	33.4291	36.7451	1.01146
100	12.0834	41.7852	45.9143	1.00073
120	2.98019	50.1405	55.0377	0.999811
140	0.00228075	57.9075	59.1849	0.772135
160	0.000909542	63.4115	59.412	0.57058
180	0.000579577	67.6693	59.5323	0.456609
200	0.000419915	71.1357	59.6147	0.377251
220	0.000323517	74.0266	59.6765	0.317316
240	0.00025832	76.4729	59.725	0.270024
260	0.000211117	78.5633	59.7643	0.23167
280	0.000175446	80.3624	59.7966	0.199976
300	0.000147521	81.919	59.8237	0.173429
320	0.00012522	83.2715	59.8466	0.150963
340	0.000107074	84.4506	59.8661	0.131801
360	9.20886e-05	85.4813	59.8829	0.115353
380	7.95745e-05	86.3843	59.8973	0.101163
400	6.90313e-05	87.1768	59.9098	0.0888699
420	6.00833e-05	87.8736	59.9207	0.0781827
440	5.24376e-05	88.487	59.9301	0.0688651
460	4.58644e-05	89.0275	59.9384	0.0607214
480	4.01961e-05	89.5043	59.9456	0.0535891
500	3.52907e-05	89.9253	59.952	0.0473313
520	3.10215e-05	90.2972	59.9576	0.0418325
540	2.73119e-05	90.6261	59.9625	0.0369942
560	2.40687e-05	90.9169	59.9668	0.0327322
580	2.12239e-05	91.1744	59.9706	0.0289742
600	1.87451e-05	91.4023	59.974	0.0256577
620	1.65498e-05	91.6041	59.977	0.0227286
640	1.46399e-05	91.783	59.9796	0.0201399
660	1.29392e-05	91.9415	59.9819	0.0178508
680	1.14591e-05	92.082	59.984	0.0158256
700	1.01351e-05	92.2065	59.9858	0.014033
720	8.98527e-06	92.317	59.9874	0.0124457
740	7.95011e-06	92.415	59.9888	0.0110397
760	7.05403e-06	92.5019	59.9901	0.00979397
780	6.24703e-06	92.579	59.9912	0.00868988
800	5.54074e-06	92.6474	59.9922	0.00771111
820	4.91609e-06	92.7081	59.9931	0.00684324
840	4.35346e-06	92.762	59.9938	0.00607359
860	3.86855e-06	92.8099	59.9945	0.0053909
880	3.42959e-06	92.8523	59.9951	0.00478528
900	3.04073e-06	92.89	59.9957	0.00424795
920	2.70333e-06	92.9235	59.9962	0.00377115
940	2.39609e-06	92.9532	59.9966	0.00334804
960	2.12513e-06	92.9795	59.997	0.00297252
980	1.89035e-06	93.0029	59.9973	0.00263921
1000	1.67673e-06	93.0237	59.9976	0.00234336
1020	1.48547e-06	93.0422	59.9979	0.00208074
1040	1.32181e-06	93.0586	59.9981	0.00184759
1060	1.17462e-06	93.0731	59.9983	0.00164061
1080	1.03998e-06	93.086	59.9985	0.00145685
1100	9.23359e-07	93.0975	59.9987	0.00129369
1120	8.22068e-07	93.1077	59.9988	0.00114882
1140	7.30245e-07	93.1168	59.999	0.0010202
1160	6.46288e-07	93.1248	59.9991	0.000905981
1180	5.73741e-07	93.1319	59.9992	0.000804562
1200	5.10973e-07	93.1383	59.9993	0.000714505
1220	4.54441e-07	93.1439	59.9994	0.000634536
1240	4.0271e-07	93.1489	59.9994	0.00056352
1260	3.56405e-07	93.1533	59.9995	0.000500454
1280	3.17038e-07	93.1573	59.9995	0.000444451
1300	2.82454e-07	93.1608	59.9996	0.00039472
1320	2.51188e-07	93.1639	59.9996	0.000350556
1340	2.22589e-07	93.1666	59.9997	0.000311333
1360	1.9681e-07	93.1691	59.9997	0.000276498
1380	1.74854e-07	93.1713	59.9998	0.000245563
1400	1.55792e-07	93.1732	59.9998	0.000218092
1420	1.38791e-07	93.1749	59.9998	0.000193697
1440	1.23352e-07	93.1765	59.9998	0.000172031
1460	1.09235e-07	93.1778	59.9998	0.000152787
1480	9.6516e-08	93.179	59.9999	0.000135694
1500	8.56561e-08	93.1801	59.9999	0.000120515
1520	7.62756e-08	93.181	59.9999	0.000107036
1540	6.80041e-08	93.1819	59.9999	9.50674e-05
1560	6.05802e-08	93.1826	59.9999	8.44384e-05
1580	5.38342e-08	93.1833	59.9999	7.49975e-05
1600	4.767e-08	93.1839	59.9999	6.66105e-05
1620	4.20771e-08	93.1844	59.9999	5.91592e-05
1640	3.72551e-08	93.1849	59.9999	5.25414e-05
1660	3.31084e-08	93.1853	60	4.66656e-05
1680	2.94971e-08	93.1856	60	4.14493e-05
1700	2.63098e-08	93.186	60	3.68183e-05
1720	2.34607e-08	93.1863	60	3.2706e-05
1740	2.0886e-08	93.1865	60	2.90533e-05
1760	1.85412e-08	93.1867	60	2.58078e-05
1780	1.63976e-08	93.187	60	2.29232e-05
1800	1.44567e-08	93.1871	60	2.03589e-05
1820	1.27772e-08	93.1873	60	1.80808e-05
1840	1.13275e-08	93.1874	60	1.60584e-05
1860	1.007e-08	93.1876	60	1.42637e-05
1880	8.97195e-09	93.1877	60	1.26715e-05
1900	8.00583e-09	93.1878	60	1.12588e-05
1920	7.1485e-09	93.1879	60	1.00051e-05
1940	6.38095e-09	93.1879	60	8.89192e-06
1960	5.6879e-09	93.188	60	7.90288e-06
1980	5.05742e-09	93.1881	60	7.02343e-06
2000	4.48055e-09	93.1881	60	6.24074e-06
2020	3.9509e-09	93.1882	60	5.5436e-06
2040	3.47784e-09	93.1882	60	4.92269e-06
2060	3.06609e-09	93.1883	60	4.37055e-06
2080	2.70812e-09	93.1883	60	3.88029e-06
2100	2.39709e-09	93.1883	60	3.44553e-06
2120	2.12677e-09	93.1883	60	3.0604e-06
2140	1.89154e-09	93.1884	60	2.71947e-06
2160	1.68637e-09	93.1884	60	2.41781e-06
2180	1.50674e-09	93.1884	60	2.15089e-06
2200	1.3487e-09	93.1884	60	1.91461e-06
2220	1.20874e-09	93.1884	60	1.70526e-06
2240	1.08385e-09	93.1885	60	1.5195e-06
2260	9.71424e-10	93.1885	60	1.35435e-06
2280	8.69266e-10	93.1885	60	1.20715e-06
2300	7.75553e-10	93.1885	60	1.07558e-06
2320	6.88806e-10	93.1885	60	9.57594e-07
2340	6.07858e-10	93.1885	60	8.51415e-07
2360	5.33467e-10	93.1885	60	7.55785e-07
2380	4.67446e-10	93.1885	60	6.70049e-07
2400	4.09104e-10	93.1885	60	5.93414e-07
2420	3.57759e-10	93.1885	60	5.25124e-07
2440	3.12765e-10	93.1885	60	4.64462e-07
2460	2.73512e-10	93.1885	60	4.10749e-07
2480	2.39428e-10	93.1885	60	3.63345e-07
2500	2.09972e-10	93.1885	60	3.21646e-07
2520	1.84637e-10	93.1885	60	2.85083e-07
2540	1.6295e-10	93.1885	60	2.53124e-07
2560	1.44469e-10	93.1885	60	2.25267e-07
2580	1.28782e-10	93.1886	60	2.01046e-07
2600	1.15506e-10	93.1886	60	1.80026e-07
2620	1.0429e-10	93.1886	60	1.61802e-07
2640	9.48064e-11	93.1886	60	1.46e-07
2660	8.67584e-11	93.1886	60	1.32275e-07
2680	7.98732e-11	93.1886	60	1.20308e-07
2700	7.39038e-11	93.1886	60	1.09811e-07
2720	6.86273e-11	93.1886	60	1.00517e-07
2740	6.38439e-11	93.1886	60	9.21892e-08
2760	5.93765e-11	93.1886	60	8.46115e-08
2780	5.50692e-11	93.1886	60	7.75924e-08
2800	5.07867e-11	93.1886	60	7.09625e-08
2820	4.64132e-11	93.1886	60	6.45737e-08
2840	4.18519e-11	93.1886	60	5.82983e-08
2860	3.70358e-11	93.1886	60	5.20391e-08
2880	3.25509e-11	93.1886	60	4.63058e-08
2900	2.87028e-11	93.1886	60	4.1359e-08
2920	2.54302e-11	93.1886	60	3.71236e-08
2940	2.26753e-11	93.1886	60	3.35289e-08
2960	2.03838e-11	93.1886	60	3.05084e-08
2980	1.85045e-11	93.1886	60	2.79997e-08
3000	1.69899e-11	93.1886	60	2.5944e-08
3020	1.57952e-11	93.1886	60	2.42869e-08
3040	1.48789e-11	93.1886	60	2.29773e-08
3060	1.42024e-11	93.1886	60	2.19679e-08
3080	1.37299e-11	93.1886	60	2.12148e-08
3100	1.34286e-11	93.1886	60	2.06775e-08
3120	1.3268e-11	93.1886	60	2.03188e-08
3140	1.32206e-11	93.1886	60	2.01046e-08
3160	1.32612e-11	93.1886	60	2.00038e-08
3180	1.33668e-11	93.1886	60	1.99884e-08
3200	1.35171e-11	93.1886	60	2.0033e-08
3220	1.36937e-11	93.1886	60	2.0115e-08
3240	1.38803e-11	93.1886	60	2.02143e-08
3260	1.40629e-11	93.1886	60	2.03133e-08
3280	1.42291e-11	93.1886	60	2.03969e-08
3300	1.43685e-11	93.1886	60	2.04519e-08
3320	1.44724e-11	93.1886	60	2.04675e-08
3340	1.45338e-11	93.1886	60	2.04348e-08
3360	1.4547e-11	93.1886	60	2.03468e-08
3380	1.45081e-11	93.1886	60	2.01982e-08
3400	1.44143e-11	93.1886	60	1.99854e-08
3420	1.42641e-11	93.1886	60	1.97066e-08
3440	1.40572e-11	93.1886	60	1.93609e-08
3460	1.37943e-11	93.1886	60	1.89492e-08
3480	1.34772e-11	93.1886	60	1.84734e-08
3500	1.31085e-11	93.1886	60	1.79365e-08
3520	1.26916e-11	93.1886	60	1.73424e-08
3540	1.22306e-11	93.1886	60	1.6696e-08
3560	1.17301e-11	93.1886	60	1.60029e-08
3580	1.11953e-11	93.1886	60	1.52692e-08
3600	1.06317e-11	93.1886	60	1.45016e-08
3620	1.00454e-11	93.1886	60	1.37074e-08
3640	9.44227e-12	93.1886	60	1.28938e-08
3660	8.82866e-12	93.1886	60	1.20685e-08
3680	8.21079e-12	93.1886	60	1.12391e-08
3700	7.59482e-12	93.1886	60	1.04131e-08
3720	6.98679e-12	93.1886	60	9.59793e-09
3740	6.39243e-12	93.1886	60	8.80068e-09
3760	5.81715e-12	93.1886	60	8.02805e-09
3780	5.2659e-12	93.1886	60	7.28623e-09
3800	4.74309e-12	93.1886	60	6.58075e-09
3820	4.2525e-12	93.1886	60	5.91642e-09
3840	3.79716e-12	93.1886	60	5.29718e-09
3860	3.37929e-12	93.1886	60	4.72599e-09
3880	3.00018e-12	93.1886	60	4.20471e-09
3900	2.70997e-12	93.1886	60	3.80075e-09
3920	2.4623e-12	93.1886	60	3.45339e-09
3940	2.21463e-12	93.1886	60	3.10603e-09
3960	1.96696e-12	93.1886	60	2.75867e-09
3980	1.71929e-12	93.1886	60	2.41131e-09
4000	1.47162e-12	93.1886	60	2.06395e-09

## Sheet: varycA4_600-1Csx1-1Crn1-0Acr
Time	cA4	cleavedRNA	A2>P	cA4_Csx1 + cA4_Csx1_RNA
0	600	0	0	0
20	588.801	8.35794	9.19915	0.999999
40	579.601	16.7155	18.3983	1.00008
60	570.401	25.0728	27.5974	1.00025
80	561.202	33.4296	36.7965	1.00035
100	552.003	41.7861	45.9956	1.00032
120	542.805	50.1422	55.1947	1.00017
140	533.606	58.498	64.3938	0.999994
160	524.401	66.8533	73.5928	1.00126
180	515.189	75.2082	82.7919	1.00388
200	505.977	83.5628	91.9909	1.00647
220	496.769	91.9169	101.19	1.00822
240	487.568	100.271	110.389	1.00869
260	478.373	108.624	119.588	1.00783
280	469.184	116.977	128.787	1.00585
300	459.999	125.329	137.986	1.00314
320	450.814	133.681	147.185	1.00022
340	441.614	142.032	156.383	1.00047
360	432.393	150.383	165.582	1.00507
380	423.168	158.734	174.781	1.01044
400	413.95	167.084	183.98	1.01435
420	404.744	175.433	193.179	1.01566
440	395.553	183.782	202.377	1.01413
460	386.374	192.131	211.576	1.01023
480	377.201	200.479	220.775	1.00487
500	368.03	208.826	229.973	0.999374
520	358.822	217.173	239.172	1.00133
540	349.587	225.519	248.371	1.00863
560	340.355	233.865	257.569	1.01549
580	331.141	242.21	266.768	1.01878
600	321.949	250.555	275.966	1.01748
620	312.776	258.898	285.165	1.0122
640	303.615	267.242	294.363	1.00459
660	294.444	275.584	303.561	0.999024
680	285.2	283.926	312.76	1.00834
700	275.937	292.267	321.958	1.02174
720	266.698	300.608	331.156	1.02999
740	257.503	308.948	340.354	1.02948
760	248.347	317.287	349.552	1.02083
780	239.214	325.625	358.75	1.00744
800	230.053	333.963	367.948	0.999902
820	220.74	342.3	377.146	1.02359
840	211.413	350.636	386.343	1.05027
860	202.166	358.971	395.541	1.06056
880	193.019	367.305	404.738	1.05002
900	183.945	375.639	413.936	1.02456
920	174.879	383.972	423.133	0.997648
940	165.472	392.303	432.33	1.04098
960	155.979	400.634	441.527	1.10214
980	146.695	408.964	450.723	1.12018
1000	137.664	417.293	459.92	1.08602
1020	128.772	425.62	469.116	1.02325
1040	119.552	433.947	478.312	1.02814
1060	109.722	442.273	487.508	1.15941
1080	100.34	450.597	496.703	1.19795
1100	91.5679	458.921	505.898	1.11054
1120	82.9413	467.243	515.092	0.993232
1140	72.9144	475.564	524.286	1.1657
1160	63.5646	483.883	533.478	1.1982
1180	55.2249	492.202	542.67	1.02193
1200	45.5402	500.519	551.86	1.12456
1220	36.7556	508.834	561.048	1.04097
1240	27.567	517.148	570.232	1.04206
1260	18.5638	525.461	579.41	1.00592
1280	9.42993	533.771	588.573	1.00038
1300	0.493889	542.077	597.607	0.99711
1320	0.0019533	548.588	599.383	0.580086
1340	0.000895462	552.502	599.598	0.384755
1360	0.000546414	555.206	599.715	0.274748
1380	0.000368716	557.17	599.79	0.202794
1400	0.000261866	558.634	599.842	0.152524
1420	0.000191588	559.742	599.88	0.116094
1440	0.000143008	560.588	599.908	0.0890841
1460	0.000108116	561.24	599.929	0.06875
1480	8.2525e-05	561.744	599.945	0.0532781
1500	6.34138e-05	562.135	599.957	0.0414153
1520	4.89759e-05	562.439	599.967	0.0322683
1540	3.79672e-05	562.677	599.974	0.0251856
1560	2.95231e-05	562.862	599.98	0.0196838
1580	2.30246e-05	563.007	599.984	0.0153998
1600	1.79859e-05	563.12	599.988	0.0120578
1620	1.40468e-05	563.209	599.99	0.00944692
1640	1.09753e-05	563.279	599.992	0.00740495
1660	8.61777e-06	563.333	599.994	0.0058065
1680	6.73951e-06	563.376	599.995	0.00455446
1700	5.28762e-06	563.41	599.996	0.00357321
1720	4.14785e-06	563.436	599.997	0.00280387
1740	3.25071e-06	563.457	599.998	0.0022005
1760	2.55243e-06	563.473	599.998	0.00172715
1780	2.0046e-06	563.486	599.999	0.00135575
1800	1.56845e-06	563.496	599.999	0.00106429
1820	1.23789e-06	563.504	599.999	0.00083554
1840	9.64686e-07	563.51	599.999	0.000655981
1860	7.60422e-07	563.515	599.999	0.000515032
1880	5.99404e-07	563.518	600	0.000404391
1900	4.66254e-07	563.521	600	0.000317515
1920	3.67309e-07	563.524	600	0.000249313
1940	2.90523e-07	563.526	600	0.00019578
1960	2.26972e-07	563.527	600	0.000153738
1980	1.76678e-07	563.528	600	0.000120716
2000	1.39599e-07	563.529	600	9.48013e-05
2020	1.10587e-07	563.53	600	7.44648e-05
2040	8.67123e-08	563.53	600	5.84892e-05
2060	6.7098e-08	563.531	600	4.59271e-05
2080	5.25058e-08	563.531	600	3.60642e-05
2100	4.15499e-08	563.531	600	2.83339e-05
2120	3.30135e-08	563.531	600	2.22736e-05
2140	2.60858e-08	563.532	600	1.75128e-05
2160	2.02843e-08	563.532	600	1.37611e-05
2180	1.563e-08	563.532	600	1.08008e-05
2200	1.21509e-08	563.532	600	8.47661e-06
2220	9.5495e-09	563.532	600	6.66037e-06
2240	7.58517e-09	563.532	600	5.24418e-06
2260	6.06939e-09	563.532	600	4.13873e-06
2280	4.85967e-09	563.532	600	3.27144e-06
2300	3.85381e-09	563.532	600	2.58474e-06
2320	2.98509e-09	563.532	600	2.03431e-06
2340	2.27484e-09	563.532	600	1.59229e-06
2360	1.72743e-09	563.532	600	1.24189e-06
2380	1.31308e-09	563.532	600	9.67638e-07
2400	1.00547e-09	563.532	600	7.55752e-07
2420	7.81505e-10	563.532	600	5.94078e-07
2440	6.21178e-10	563.532	600	4.71985e-07
2460	5.07355e-10	563.532	600	3.80279e-07
2480	4.25605e-10	563.532	600	3.1111e-07
2500	3.64003e-10	563.532	600	2.57886e-07
2520	3.12953e-10	563.532	600	2.15185e-07
2540	2.64996e-10	563.532	600	1.78661e-07
2560	2.14628e-10	563.532	600	1.44955e-07
2580	1.63065e-10	563.532	600	1.13415e-07
2600	1.19933e-10	563.532	600	8.69707e-08
2620	8.47078e-11	563.532	600	6.52091e-08
2640	5.64773e-11	563.532	600	4.75945e-08
2660	3.43872e-11	563.532	600	3.36252e-08
2680	1.76399e-11	563.532	600	2.2833e-08
2700	5.49296e-12	563.532	600	1.47816e-08
2720	-2.74257e-12	563.532	600	9.06628e-09
2740	-7.70392e-12	563.532	600	5.31265e-09
2760	-9.9781e-12	563.532	600	3.17568e-09
2780	-1.01036e-11	563.532	600	2.33879e-09
2800	-8.57189e-12	563.532	600	2.5129e-09
2820	-5.82933e-12	563.532	600	3.43546e-09
2840	-2.27854e-12	563.532	600	4.86948e-09
2860	1.71985e-12	563.532	600	6.60259e-09
2880	5.84559e-12	563.532	600	8.4461e-09
2900	9.81714e-12	563.532	600	1.0234e-08
2920	1.33901e-11	563.532	600	1.1822e-08
2940	1.63555e-11	563.532	600	1.30866e-08
2960	1.85382e-11	563.532	600	1.39243e-08
2980	1.97952e-11	563.532	600	1.42501e-08
3000	2.00143e-11	563.532	600	1.39972e-08
3020	1.91119e-11	563.532	600	1.31157e-08
3040	1.70319e-11	563.532	600	1.15717e-08
3060	1.4579e-11	563.532	600	9.89887e-09
3080	1.43131e-11	563.532	600	9.71833e-09
3100	1.40472e-11	563.532	600	9.53779e-09
3120	1.37813e-11	563.532	600	9.35725e-09
3140	1.35154e-11	563.532	600	9.17671e-09
3160	1.32495e-11	563.532	600	8.99617e-09
3180	1.29836e-11	563.532	600	8.81563e-09
3200	1.27177e-11	563.532	600	8.63509e-09
3220	1.24518e-11	563.532	600	8.45455e-09
3240	1.21859e-11	563.532	600	8.27401e-09
3260	1.192e-11	563.532	600	8.09347e-09
3280	1.16541e-11	563.532	600	7.91293e-09
3300	1.13882e-11	563.532	600	7.73239e-09
3320	1.11223e-11	563.532	600	7.55185e-09
3340	1.08564e-11	563.532	600	7.37131e-09
3360	1.05905e-11	563.532	600	7.19076e-09
3380	1.03246e-11	563.532	600	7.01022e-09
3400	1.00587e-11	563.532	600	6.82968e-09
3420	9.79281e-12	563.532	600	6.64914e-09
3440	9.52691e-12	563.532	600	6.4686e-09
3460	9.26101e-12	563.532	600	6.28806e-09
3480	8.99511e-12	563.532	600	6.10752e-09
3500	8.72922e-12	563.532	600	5.92698e-09
3520	8.46332e-12	563.532	600	5.74644e-09
3540	8.19742e-12	563.532	600	5.5659e-09
3560	7.93152e-12	563.532	600	5.38536e-09
3580	7.66562e-12	563.532	600	5.20482e-09
3600	7.39972e-12	563.532	600	5.02428e-09
3620	7.13382e-12	563.532	600	4.84374e-09
3640	6.86792e-12	563.532	600	4.6632e-09
3660	6.60202e-12	563.532	600	4.48265e-09
3680	6.33612e-12	563.532	600	4.30211e-09
3700	6.07022e-12	563.532	600	4.12157e-09
3720	5.80433e-12	563.532	600	3.94103e-09
3740	5.53843e-12	563.532	600	3.76049e-09
3760	5.27253e-12	563.532	600	3.57995e-09
3780	5.00663e-12	563.532	600	3.39941e-09
3800	4.74073e-12	563.532	600	3.21887e-09
3820	4.47483e-12	563.532	600	3.03833e-09
3840	4.20893e-12	563.532	600	2.85779e-09
3860	3.94303e-12	563.532	600	2.67725e-09
3880	3.67713e-12	563.532	600	2.49671e-09
3900	3.41123e-12	563.532	600	2.31617e-09
3920	3.14533e-12	563.532	600	2.13563e-09
3940	2.87944e-12	563.532	600	1.95509e-09
3960	2.61354e-12	563.532	600	1.77454e-09
3980	2.34764e-12	563.532	600	1.594e-09
4000	2.08174e-12	563.532	600	1.41346e-09

## Sheet: varycA4_6-1Csx1-1Crn1-1Acr
Time	cA4	cleavedRNA	A2>P	cA4_Csx1 + cA4_Csx1_RNA
0	6	0	0	0
2	0.00142617	0.7372	5.22126	0.742633
4	0.000713769	1.27847	5.41318	0.569667
6	0.000479705	1.707	5.52604	0.462534
8	0.000356207	2.05991	5.6059	0.385645
10	0.000278371	2.35659	5.66676	0.326645
12	0.000224495	2.60925	5.71508	0.279608
14	0.000184885	2.82637	5.75446	0.24117
16	0.000154582	3.01419	5.78713	0.209212
18	0.000130743	3.17749	5.81461	0.1823
20	0.000111555	3.32004	5.83795	0.159418
22	9.57932e-05	3.44488	5.85792	0.139813
24	8.27781e-05	3.55451	5.87513	0.122913
26	7.18301e-05	3.65097	5.89003	0.108272
28	6.25805e-05	3.73602	5.90299	0.0955362
30	5.46926e-05	3.81112	5.91429	0.0844195
32	4.79344e-05	3.87753	5.92418	0.0746877
34	4.20976e-05	3.9363	5.93286	0.0661477
36	3.70573e-05	3.98838	5.94049	0.0586376
38	3.26688e-05	4.03457	5.94721	0.0520213
40	2.88359e-05	4.07556	5.95314	0.0461834
42	2.55044e-05	4.11196	5.95837	0.0410253
44	2.25648e-05	4.1443	5.96301	0.0364626
46	1.99846e-05	4.17305	5.96711	0.0324223
48	1.77334e-05	4.19863	5.97074	0.0288414
50	1.57257e-05	4.22138	5.97396	0.0256652
52	1.39549e-05	4.24163	5.97682	0.022846
54	1.24129e-05	4.25965	5.97937	0.0203422
56	1.10311e-05	4.27571	5.98162	0.0181173
58	9.79328e-06	4.29001	5.98363	0.0161392
60	8.72263e-06	4.30275	5.98541	0.0143799
62	7.77147e-06	4.3141	5.987	0.0128146
64	6.91008e-06	4.32421	5.98842	0.0114214
66	6.14287e-06	4.33323	5.98967	0.0101811
68	5.48063e-06	4.34127	5.99079	0.00907655
70	4.88969e-06	4.34844	5.99179	0.00809273
72	4.35253e-06	4.35483	5.99268	0.00721622
74	3.86822e-06	4.36053	5.99347	0.00643518
76	3.45127e-06	4.36561	5.99418	0.00573911
78	3.08396e-06	4.37014	5.99481	0.00511871
80	2.75188e-06	4.37418	5.99537	0.00456564
82	2.44876e-06	4.37779	5.99587	0.00407254
84	2.17697e-06	4.381	5.99632	0.00363286
86	1.94355e-06	4.38387	5.99671	0.00324079
88	1.73819e-06	4.38643	5.99707	0.00289117
90	1.55318e-06	4.38872	5.99738	0.00257937
92	1.38437e-06	4.39075	5.99767	0.00230125
94	1.23018e-06	4.39257	5.99792	0.00205316
96	1.09497e-06	4.39419	5.99814	0.00183185
98	9.78388e-07	4.39564	5.99834	0.00163445
100	8.75567e-07	4.39693	5.99852	0.00145838
102	7.83154e-07	4.39808	5.99868	0.0013013
104	6.99033e-07	4.39911	5.99882	0.00116116
106	6.22071e-07	4.40003	5.99895	0.00103611
108	5.52289e-07	4.40084	5.99906	0.000924523
110	4.91968e-07	4.40157	5.99916	0.000824963
112	4.39651e-07	4.40223	5.99925	0.000736152
114	3.93576e-07	4.40281	5.99933	0.000656928
116	3.52404e-07	4.40333	5.99941	0.000586251
118	3.15166e-07	4.40379	5.99947	0.000523186
120	2.81205e-07	4.4042	5.99953	0.000466903
122	2.5012e-07	4.40457	5.99958	0.000416662
124	2.21874e-07	4.4049	5.99962	0.00037181
126	1.97315e-07	4.40519	5.99966	0.000331784
128	1.76019e-07	4.40545	5.9997	0.00029608
130	1.57396e-07	4.40569	5.99973	0.000264236
132	1.4096e-07	4.4059	5.99976	0.000235836
134	1.26311e-07	4.40608	5.99979	0.000210504
136	1.13133e-07	4.40625	5.99981	0.000187902
138	1.01179e-07	4.4064	5.99983	0.000167729
140	9.02677e-08	4.40653	5.99985	0.000149715
142	8.02701e-08	4.40665	5.99986	0.000133624
144	7.11354e-08	4.40675	5.99988	0.000119245
146	6.31045e-08	4.40685	5.99989	0.000106404
148	5.61108e-08	4.40693	5.9999	9.49454e-05
150	5.00084e-08	4.40701	5.99991	8.47286e-05
152	4.46676e-08	4.40707	5.99992	7.56231e-05
154	3.99743e-08	4.40713	5.99993	6.75102e-05
156	3.58287e-08	4.40719	5.99994	6.02815e-05
158	3.21445e-08	4.40723	5.99995	5.38392e-05
160	2.88482e-08	4.40727	5.99995	4.80946e-05
162	2.58776e-08	4.40731	5.99996	4.29683e-05
164	2.31815e-08	4.40735	5.99996	3.83892e-05
166	2.07181e-08	4.40738	5.99997	3.42944e-05
168	1.84546e-08	4.4074	5.99997	3.0628e-05
170	1.63659e-08	4.40743	5.99997	2.73412e-05
172	1.44722e-08	4.40745	5.99998	2.43937e-05
174	1.28036e-08	4.40747	5.99998	2.17556e-05
176	1.1337e-08	4.40749	5.99998	1.93988e-05
178	1.00507e-08	4.4075	5.99998	1.7297e-05
180	8.92455e-09	4.40751	5.99998	1.54257e-05
182	7.93989e-09	4.40753	5.99999	1.3762e-05
184	7.07962e-09	4.40754	5.99999	1.22846e-05
186	6.32802e-09	4.40755	5.99999	1.0974e-05
188	5.67077e-09	4.40756	5.99999	9.81185e-06
190	5.09483e-09	4.40756	5.99999	8.78148e-06
192	4.58844e-09	4.40757	5.99999	7.86755e-06
194	4.14104e-09	4.40758	5.99999	7.05606e-06
196	3.74319e-09	4.40758	5.99999	6.33426e-06
198	3.38655e-09	4.40759	5.99999	5.69066e-06
200	3.06381e-09	4.40759	5.99999	5.1149e-06
202	2.76864e-09	4.40759	6	4.59773e-06
204	2.49563e-09	4.4076	6	4.13096e-06
206	2.2402e-09	4.4076	6	3.70737e-06
208	1.99862e-09	4.4076	6	3.3207e-06
210	1.76844e-09	4.40761	6	2.96575e-06
212	1.55732e-09	4.40761	6	2.6422e-06
214	1.3673e-09	4.40761	6	2.34909e-06
216	1.1969e-09	4.40761	6	2.08437e-06
218	1.04473e-09	4.40761	6	1.84608e-06
220	9.09426e-10	4.40762	6	1.63235e-06
222	7.8971e-10	4.40762	6	1.44135e-06
224	6.84343e-10	4.40762	6	1.27138e-06
226	5.92143e-10	4.40762	6	1.12075e-06
228	5.1198e-10	4.40762	6	9.87908e-07
230	4.42778e-10	4.40762	6	8.71324e-07
232	3.83511e-10	4.40762	6	7.69562e-07
234	3.33203e-10	4.40762	6	6.81248e-07
236	2.90927e-10	4.40762	6	6.05077e-07
238	2.55805e-10	4.40762	6	5.39808e-07
240	2.27003e-10	4.40762	6	4.84268e-07
242	2.03736e-10	4.40762	6	4.37344e-07
244	1.85263e-10	4.40763	6	3.97985e-07
246	1.70886e-10	4.40763	6	3.65203e-07
248	1.59949e-10	4.40763	6	3.38066e-07
250	1.51841e-10	4.40763	6	3.157e-07
252	1.45989e-10	4.40763	6	2.9729e-07
254	1.41861e-10	4.40763	6	2.82072e-07
256	1.38963e-10	4.40763	6	2.69337e-07
258	1.36839e-10	4.40763	6	2.5843e-07
260	1.3507e-10	4.40763	6	2.48743e-07
262	1.33272e-10	4.40763	6	2.3972e-07
264	1.31096e-10	4.40763	6	2.30852e-07
266	1.28228e-10	4.40763	6	2.21676e-07
268	1.24383e-10	4.40763	6	2.11774e-07
270	1.19312e-10	4.40763	6	2.00773e-07
272	1.12794e-10	4.40763	6	1.88342e-07
274	1.04637e-10	4.40763	6	1.74188e-07
276	9.4679e-11	4.40763	6	1.58063e-07
278	8.36418e-11	4.40763	6	1.40815e-07
280	7.31885e-11	4.40763	6	1.24488e-07
282	6.33485e-11	4.40763	6	1.09112e-07
284	5.41027e-11	4.40763	6	9.46571e-08
286	4.54321e-11	4.40763	6	8.10941e-08
288	3.73181e-11	4.40763	6	6.83941e-08
290	2.97426e-11	4.40763	6	5.65287e-08
292	2.26873e-11	4.40763	6	4.54699e-08
294	1.61344e-11	4.40763	6	3.519e-08
296	1.00665e-11	4.40763	6	2.56619e-08
298	4.46628e-12	4.40763	6	1.68587e-08
300	-6.83319e-13	4.40763	6	8.75409e-09
302	-5.39904e-12	4.40763	6	1.32199e-09
304	-9.69738e-12	4.40763	6	-5.46317e-09
306	-1.35946e-11	4.40763	6	-1.16266e-08
308	-1.71066e-11	4.40763	6	-1.71931e-08
310	-2.02493e-11	4.40763	6	-2.2187e-08
312	-2.3038e-11	4.40763	6	-2.66325e-08
314	-2.54881e-11	4.40763	6	-3.05532e-08
316	-2.76145e-11	4.40763	6	-3.39722e-08
318	-2.94319e-11	4.40763	6	-3.69125e-08
320	-3.09549e-11	4.40763	6	-3.93966e-08
322	-3.21977e-11	4.40763	6	-4.14465e-08
324	-3.31743e-11	4.40763	6	-4.30841e-08
326	-3.38986e-11	4.40763	6	-4.43307e-08
328	-3.43839e-11	4.40763	6	-4.52072e-08
330	-3.46438e-11	4.40763	6	-4.57344e-08
332	-3.46911e-11	4.40763	6	-4.59324e-08
334	-3.45387e-11	4.40763	6	-4.58212e-08
336	-3.41993e-11	4.40763	6	-4.54203e-08
338	-3.36852e-11	4.40763	6	-4.47489e-08
340	-3.30085e-11	4.40763	6	-4.38258e-08
342	-3.21811e-11	4.40763	6	-4.26695e-08
344	-3.12147e-11	4.40763	6	-4.1298e-08
346	-3.01209e-11	4.40763	6	-3.97292e-08
348	-2.89107e-11	4.40763	6	-3.79805e-08
350	-2.75952e-11	4.40763	6	-3.60689e-08
352	-2.61853e-11	4.40763	6	-3.40112e-08
354	-2.46914e-11	4.40763	6	-3.18238e-08
356	-2.3124e-11	4.40763	6	-2.95227e-08
358	-2.14931e-11	4.40763	6	-2.71236e-08
360	-1.98087e-11	4.40763	6	-2.4642e-08
362	-1.80805e-11	4.40763	6	-2.20929e-08
364	-1.63181e-11	4.40763	6	-1.9491e-08
366	-1.45306e-11	4.40763	6	-1.68507e-08
368	-1.27272e-11	4.40763	6	-1.41861e-08
370	-1.09168e-11	4.40763	6	-1.1511e-08
372	-9.10797e-12	4.40763	6	-8.83885e-09
374	-7.30925e-12	4.40763	6	-6.18271e-09
376	-5.52889e-12	4.40763	6	-3.55541e-09
378	-3.77495e-12	4.40763	6	-9.69456e-10
380	-2.0553e-12	4.40763	6	1.56296e-09
382	-3.77598e-13	4.40763	6	4.02994e-09
384	1.25068e-12	4.40763	6	6.41992e-09
386	2.82225e-12	4.40763	6	8.72162e-09
388	4.33003e-12	4.40763	6	1.09241e-08
390	5.76714e-12	4.40763	6	1.30165e-08
392	7.12686e-12	4.40763	6	1.49887e-08
394	8.40268e-12	4.40763	6	1.68304e-08
396	9.58828e-12	4.40763	6	1.85319e-08
398	1.06775e-11	4.40763	6	2.00837e-08
400	1.16644e-11	4.40763	6	2.14764e-08
402	1.25432e-11	4.40763	6	2.27012e-08
404	1.33083e-11	4.40763	6	2.37495e-08
406	1.39543e-11	4.40763	6	2.46127e-08
408	1.44759e-11	4.40763	6	2.52828e-08
410	1.48681e-11	4.40763	6	2.5752e-08
412	1.5126e-11	4.40763	6	2.60126e-08
414	1.52449e-11	4.40763	6	2.60574e-08
416	1.52202e-11	4.40763	6	2.58794e-08
418	1.50476e-11	4.40763	6	2.54717e-08
420	1.47228e-11	4.40763	6	2.48279e-08
422	1.42418e-11	4.40763	6	2.39418e-08
424	1.36008e-11	4.40763	6	2.28072e-08
426	1.2796e-11	4.40763	6	2.14185e-08
428	1.18239e-11	4.40763	6	1.97702e-08
430	1.06812e-11	4.40763	6	1.78571e-08
432	9.46729e-12	4.40763	6	1.58349e-08
434	8.27323e-12	4.40763	6	1.38456e-08
436	7.09883e-12	4.40763	6	1.18892e-08
438	5.94395e-12	4.40763	6	9.96523e-09
440	4.80841e-12	4.40763	6	8.07353e-09
442	3.69208e-12	4.40763	6	6.21382e-09
444	2.59481e-12	4.40763	6	4.38586e-09
446	1.51644e-12	4.40763	6	2.58939e-09
448	4.56821e-13	4.40763	6	8.24173e-10
450	-5.84194e-13	4.40763	6	-9.10052e-10
452	-1.60675e-12	4.40763	6	-2.61353e-09
454	-2.61101e-12	4.40763	6	-4.28651e-09
456	-3.59711e-12	4.40763	6	-5.92924e-09
458	-4.5652e-12	4.40763	6	-7.54196e-09
460	-5.51543e-12	4.40763	6	-9.12492e-09
462	-6.44794e-12	4.40763	6	-1.06784e-08
464	-7.36288e-12	4.40763	6	-1.22025e-08
466	-8.2604e-12	4.40763	6	-1.36977e-08
468	-9.14065e-12	4.40763	6	-1.5164e-08
470	-1.00038e-11	4.40763	6	-1.66019e-08
472	-1.08499e-11	4.40763	6	-1.80114e-08
474	-1.16792e-11	4.40763	6	-1.93928e-08
476	-1.24917e-11	4.40763	6	-2.07464e-08
478	-1.32878e-11	4.40763	6	-2.20725e-08
480	-1.40674e-11	4.40763	6	-2.33712e-08
482	-1.48307e-11	4.40763	6	-2.46427e-08
484	-1.55779e-11	4.40763	6	-2.58874e-08
486	-1.63091e-11	4.40763	6	-2.71055e-08
488	-1.70245e-11	4.40763	6	-2.82971e-08
490	-1.77241e-11	4.40763	6	-2.94626e-08
492	-1.84082e-11	4.40763	6	-3.06022e-08
494	-1.90769e-11	4.40763	6	-3.1716e-08
496	-1.97302e-11	4.40763	6	-3.28044e-08
498	-2.03685e-11	4.40763	6	-3.38675e-08
500	-2.09917e-11	4.40763	6	-3.49056e-08
502	-2.16e-11	4.40763	6	-3.59189e-08
504	-2.21935e-11	4.40763	6	-3.69076e-08
506	-2.27725e-11	4.40763	6	-3.7872e-08
508	-2.3337e-11	4.40763	6	-3.88123e-08
510	-2.38872e-11	4.40763	6	-3.97288e-08
512	-2.44232e-11	4.40763	6	-4.06216e-08
514	-2.49451e-11	4.40763	6	-4.14909e-08
516	-2.54531e-11	4.40763	6	-4.23371e-08
518	-2.59473e-11	4.40763	6	-4.31602e-08
520	-2.64278e-11	4.40763	6	-4.39606e-08
522	-2.68948e-11	4.40763	6	-4.47385e-08
524	-2.73484e-11	4.40763	6	-4.5494e-08
526	-2.77888e-11	4.40763	6	-4.62275e-08
528	-2.8216e-11	4.40763	6	-4.69391e-08
530	-2.86302e-11	4.40763	6	-4.7629e-08
532	-2.90315e-11	4.40763	6	-4.82974e-08
534	-2.94201e-11	4.40763	6	-4.89447e-08
536	-2.97961e-11	4.40763	6	-4.95709e-08
538	-3.01596e-11	4.40763	6	-5.01763e-08
540	-3.05107e-11	4.40763	6	-5.07612e-08
542	-3.08497e-11	4.40763	6	-5.13257e-08
544	-3.11765e-11	4.40763	6	-5.187e-08
546	-3.14913e-11	4.40763	6	-5.23944e-08
548	-3.17944e-11	4.40763	6	-5.2899e-08
550	-3.20856e-11	4.40763	6	-5.33842e-08
552	-3.23654e-11	4.40763	6	-5.385e-08
554	-3.26336e-11	4.40763	6	-5.42967e-08
556	-3.28905e-11	4.40763	6	-5.47246e-08
558	-3.31362e-11	4.40763	6	-5.51337e-08
560	-3.33708e-11	4.40763	6	-5.55244e-08
562	-3.35944e-11	4.40763	6	-5.58968e-08
564	-3.38072e-11	4.40763	6	-5.62511e-08
566	-3.40092e-11	4.40763	6	-5.65876e-08
568	-3.42007e-11	4.40763	6	-5.69064e-08
570	-3.43817e-11	4.40763	6	-5.72078e-08
572	-3.45523e-11	4.40763	6	-5.74919e-08
574	-3.47127e-11	4.40763	6	-5.7759e-08
576	-3.4863e-11	4.40763	6	-5.80092e-08
578	-3.50033e-11	4.40763	6	-5.82428e-08
580	-3.51337e-11	4.40763	6	-5.84599e-08
582	-3.52544e-11	4.40763	6	-5.86608e-08
584	-3.53654e-11	4.40763	6	-5.88456e-08
586	-3.54669e-11	4.40763	6	-5.90146e-08
588	-3.5559e-11	4.40763	6	-5.91679e-08
590	-3.56418e-11	4.40763	6	-5.93058e-08
592	-3.57155e-11	4.40763	6	-5.94283e-08
594	-3.57801e-11	4.40763	6	-5.95359e-08
596	-3.58358e-11	4.40763	6	-5.96285e-08
598	-3.58827e-11	4.40763	6	-5.97065e-08
600	-3.59209e-11	4.40763	6	-5.97699e-08
602	-3.59505e-11	4.40763	6	-5.98191e-08
604	-3.59716e-11	4.40763	6	-5.98542e-08
606	-3.59844e-11	4.40763	6	-5.98753e-08
608	-3.59889e-11	4.40763	6	-5.98827e-08
610	-3.59853e-11	4.40763	6	-5.98766e-08
612	-3.59736e-11	4.40763	6	-5.98571e-08
614	-3.59541e-11	4.40763	6	-5.98244e-08
616	-3.59268e-11	4.40763	6	-5.97788e-08
618	-3.58918e-11	4.40763	6	-5.97204e-08
620	-3.58492e-11	4.40763	6	-5.96493e-08
622	-3.57992e-11	4.40763	6	-5.95659e-08
624	-3.57418e-11	4.40763	6	-5.94702e-08
626	-3.56772e-11	4.40763	6	-5.93624e-08
628	-3.56055e-11	4.40763	6	-5.92428e-08
630	-3.55267e-11	4.40763	6	-5.91115e-08
632	-3.5441e-11	4.40763	6	-5.89686e-08
634	-3.53486e-11	4.40763	6	-5.88144e-08
636	-3.52494e-11	4.40763	6	-5.86491e-08
638	-3.51436e-11	4.40763	6	-5.84728e-08
640	-3.50314e-11	4.40763	6	-5.82857e-08
642	-3.49128e-11	4.40763	6	-5.8088e-08
644	-3.47879e-11	4.40763	6	-5.78799e-08
646	-3.46568e-11	4.40763	6	-5.76614e-08
648	-3.45197e-11	4.40763	6	-5.74329e-08
650	-3.43766e-11	4.40763	6	-5.71945e-08
652	-3.42277e-11	4.40763	6	-5.69463e-08
654	-3.40731e-11	4.40763	6	-5.66886e-08
656	-3.39128e-11	4.40763	6	-5.64214e-08
658	-3.37469e-11	4.40763	6	-5.61451e-08
660	-3.35756e-11	4.40763	6	-5.58596e-08
662	-3.3399e-11	4.40763	6	-5.55653e-08
664	-3.32172e-11	4.40763	6	-5.52623e-08
666	-3.30302e-11	4.40763	6	-5.49507e-08
668	-3.28382e-11	4.40763	6	-5.46308e-08
670	-3.26412e-11	4.40763	6	-5.43026e-08
672	-3.24395e-11	4.40763	6	-5.39664e-08
674	-3.2233e-11	4.40763	6	-5.36224e-08
676	-3.20218e-11	4.40763	6	-5.32706e-08
678	-3.18062e-11	4.40763	6	-5.29112e-08
680	-3.15861e-11	4.40763	6	-5.25445e-08
682	-3.13616e-11	4.40763	6	-5.21706e-08
684	-3.1133e-11	4.40763	6	-5.17896e-08
686	-3.09002e-11	4.40763	6	-5.14017e-08
688	-3.06633e-11	4.40763	6	-5.1007e-08
690	-3.04225e-11	4.40763	6	-5.06059e-08
692	-3.01778e-11	4.40763	6	-5.01982e-08
694	-2.99294e-11	4.40763	6	-4.97844e-08
696	-2.96774e-11	4.40763	6	-4.93644e-08
698	-2.94217e-11	4.40763	6	-4.89385e-08
700	-2.91626e-11	4.40763	6	-4.85068e-08
702	-2.89001e-11	4.40763	6	-4.80695e-08
704	-2.86344e-11	4.40763	6	-4.76268e-08
706	-2.83654e-11	4.40763	6	-4.71787e-08
708	-2.80933e-11	4.40763	6	-4.67255e-08
710	-2.78183e-11	4.40763	6	-4.62672e-08
712	-2.75403e-11	4.40763	6	-4.58041e-08
714	-2.72595e-11	4.40763	6	-4.53363e-08
716	-2.6976e-11	4.40763	6	-4.4864e-08
718	-2.66898e-11	4.40763	6	-4.43873e-08
720	-2.64011e-11	4.40763	6	-4.39063e-08
722	-2.61099e-11	4.40763	6	-4.34212e-08
724	-2.58163e-11	4.40763	6	-4.29322e-08
726	-2.55205e-11	4.40763	6	-4.24394e-08
728	-2.52225e-11	4.40763	6	-4.19429e-08
730	-2.49224e-11	4.40763	6	-4.1443e-08
732	-2.46202e-11	4.40763	6	-4.09397e-08
734	-2.43162e-11	4.40763	6	-4.04332e-08
736	-2.40102e-11	4.40763	6	-3.99236e-08
738	-2.37026e-11	4.40763	6	-3.94111e-08
740	-2.33932e-11	4.40763	6	-3.88958e-08
742	-2.30823e-11	4.40763	6	-3.83779e-08
744	-2.27699e-11	4.40763	6	-3.78575e-08
746	-2.24561e-11	4.40763	6	-3.73347e-08
748	-2.21409e-11	4.40763	6	-3.68098e-08
750	-2.18245e-11	4.40763	6	-3.62828e-08
752	-2.1507e-11	4.40763	6	-3.57538e-08
754	-2.11883e-11	4.40763	6	-3.52231e-08
756	-2.08687e-11	4.40763	6	-3.46907e-08
758	-2.05482e-11	4.40763	6	-3.41568e-08
760	-2.02268e-11	4.40763	6	-3.36216e-08
762	-1.99047e-11	4.40763	6	-3.30851e-08
764	-1.9582e-11	4.40763	6	-3.25475e-08
766	-1.92586e-11	4.40763	6	-3.2009e-08
768	-1.89348e-11	4.40763	6	-3.14696e-08
770	-1.86105e-11	4.40763	6	-3.09295e-08
772	-1.82859e-11	4.40763	6	-3.03889e-08
774	-1.79611e-11	4.40763	6	-2.98478e-08
776	-1.76361e-11	4.40763	6	-2.93065e-08
778	-1.73109e-11	4.40763	6	-2.87649e-08
780	-1.69858e-11	4.40763	6	-2.82234e-08
782	-1.66606e-11	4.40763	6	-2.76819e-08
784	-1.63357e-11	4.40763	6	-2.71407e-08
786	-1.60109e-11	4.40763	6	-2.65998e-08
788	-1.56864e-11	4.40763	6	-2.60594e-08
790	-1.53623e-11	4.40763	6	-2.55197e-08
792	-1.50387e-11	4.40763	6	-2.49806e-08
794	-1.47155e-11	4.40763	6	-2.44425e-08
796	-1.4393e-11	4.40763	6	-2.39053e-08
798	-1.40711e-11	4.40763	6	-2.33693e-08
800	-1.37499e-11	4.40763	6	-2.28344e-08
802	-1.34296e-11	4.40763	6	-2.2301e-08
804	-1.31102e-11	4.40763	6	-2.1769e-08
806	-1.27917e-11	4.40763	6	-2.12387e-08
808	-1.24743e-11	4.40763	6	-2.07101e-08
810	-1.21579e-11	4.40763	6	-2.01834e-08
812	-1.18428e-11	4.40763	6	-1.96586e-08
814	-1.15289e-11	4.40763	6	-1.91359e-08
816	-1.12164e-11	4.40763	6	-1.86155e-08
818	-1.09052e-11	4.40763	6	-1.80973e-08
820	-1.05955e-11	4.40763	6	-1.75817e-08
822	-1.02874e-11	4.40763	6	-1.70686e-08
824	-9.98086e-12	4.40763	6	-1.65582e-08
826	-9.67601e-12	4.40763	6	-1.60506e-08
828	-9.37291e-12	4.40763	6	-1.55459e-08
830	-9.07164e-12	4.40763	6	-1.50443e-08
832	-8.77225e-12	4.40763	6	-1.45458e-08
834	-8.47482e-12	4.40763	6	-1.40506e-08
836	-8.17941e-12	4.40763	6	-1.35588e-08
838	-7.8861e-12	4.40763	6	-1.30704e-08
840	-7.59495e-12	4.40763	6	-1.25857e-08
842	-7.30603e-12	4.40763	6	-1.21047e-08
844	-7.01941e-12	4.40763	6	-1.16275e-08
846	-6.73514e-12	4.40763	6	-1.11543e-08
848	-6.4533e-12	4.40763	6	-1.06851e-08
850	-6.17396e-12	4.40763	6	-1.022e-08
852	-5.89717e-12	4.40763	6	-9.75925e-09
854	-5.62301e-12	4.40763	6	-9.30285e-09
856	-5.35153e-12	4.40763	6	-8.85094e-09
858	-5.0828e-12	4.40763	6	-8.40362e-09
860	-4.81689e-12	4.40763	6	-7.96099e-09
862	-4.55386e-12	4.40763	6	-7.52317e-09
864	-4.29377e-12	4.40763	6	-7.09025e-09
866	-4.03669e-12	4.40763	6	-6.66234e-09
868	-3.78267e-12	4.40763	6	-6.23955e-09
870	-3.53178e-12	4.40763	6	-5.82198e-09
872	-3.28408e-12	4.40763	6	-5.40973e-09
874	-3.03963e-12	4.40763	6	-5.0029e-09
876	-2.7985e-12	4.40763	6	-4.6016e-09
878	-2.56074e-12	4.40763	6	-4.20593e-09
880	-2.32641e-12	4.40763	6	-3.81598e-09
882	-2.09558e-12	4.40763	6	-3.43185e-09
884	-1.8683e-12	4.40763	6	-3.05366e-09
886	-1.64463e-12	4.40763	6	-2.68148e-09
888	-1.42464e-12	4.40763	6	-2.31543e-09
890	-1.20837e-12	4.40763	6	-1.9556e-09
892	-9.95889e-13	4.40763	6	-1.60208e-09
894	-7.87255e-13	4.40763	6	-1.25498e-09
896	-5.82524e-13	4.40763	6	-9.14385e-10
898	-3.81753e-13	4.40763	6	-5.80393e-10
900	-1.84998e-13	4.40763	6	-2.531e-10
902	7.68321e-15	4.40763	6	6.74022e-11
904	1.96235e-13	4.40763	6	3.81019e-10
906	3.80603e-13	4.40763	6	6.87657e-10
908	5.6073e-13	4.40763	6	9.87225e-10
910	7.36562e-13	4.40763	6	1.27963e-09
912	9.08044e-13	4.40763	6	1.56478e-09
914	1.07512e-12	4.40763	6	1.84259e-09
916	1.23774e-12	4.40763	6	2.11297e-09
918	1.39585e-12	4.40763	6	2.37582e-09
920	1.54939e-12	4.40763	6	2.63106e-09
922	1.69832e-12	4.40763	6	2.8786e-09
924	1.84257e-12	4.40763	6	3.11836e-09
926	1.9821e-12	4.40763	6	3.35024e-09
928	2.11686e-12	4.40763	6	3.57415e-09
930	2.24679e-12	4.40763	6	3.79002e-09
932	2.37184e-12	4.40763	6	3.99776e-09
934	2.49196e-12	4.40763	6	4.19728e-09
936	2.60711e-12	4.40763	6	4.3885e-09
938	2.71722e-12	4.40763	6	4.57133e-09
940	2.82226e-12	4.40763	6	4.7457e-09
942	2.92216e-12	4.40763	6	4.91151e-09
944	3.01689e-12	4.40763	6	5.06869e-09
946	3.10639e-12	4.40763	6	5.21716e-09
948	3.19062e-12	4.40763	6	5.35683e-09
950	3.26952e-12	4.40763	6	5.48762e-09
952	3.34305e-12	4.40763	6	5.60946e-09
954	3.41116e-12	4.40763	6	5.72226e-09
956	3.4738e-12	4.40763	6	5.82595e-09
958	3.53093e-12	4.40763	6	5.92044e-09
960	3.5825e-12	4.40763	6	6.00567e-09
962	3.62846e-12	4.40763	6	6.08155e-09
964	3.66877e-12	4.40763	6	6.14801e-09
966	3.70339e-12	4.40763	6	6.20496e-09
968	3.73226e-12	4.40763	6	6.25234e-09
970	3.75534e-12	4.40763	6	6.29008e-09
972	3.77259e-12	4.40763	6	6.31809e-09
974	3.78396e-12	4.40763	6	6.3363e-09
976	3.78941e-12	4.40763	6	6.34464e-09
978	3.78889e-12	4.40763	6	6.34303e-09
980	3.78237e-12	4.40763	6	6.33141e-09
982	3.7698e-12	4.40763	6	6.3097e-09
984	3.75113e-12	4.40763	6	6.27784e-09
986	3.72633e-12	4.40763	6	6.23574e-09
988	3.69535e-12	4.40763	6	6.18335e-09
990	3.65815e-12	4.40763	6	6.12058e-09
992	3.61468e-12	4.40763	6	6.04738e-09
994	3.56492e-12	4.40763	6	5.96367e-09
996	3.50881e-12	4.40763	6	5.86939e-09
998	3.44632e-12	4.40763	6	5.76447e-09
1000	3.37741e-12	4.40763	6	5.64884e-09
1002	3.30203e-12	4.40763	6	5.52243e-09
1004	3.22015e-12	4.40763	6	5.38518e-09
1006	3.13172e-12	4.40763	6	5.23703e-09
1008	3.03672e-12	4.40763	6	5.07791e-09
1010	2.9351e-12	4.40763	6	4.90775e-09
1012	2.82682e-12	4.40763	6	4.7265e-09
1014	2.71184e-12	4.40763	6	4.53408e-09
1016	2.59013e-12	4.40763	6	4.33044e-09
1018	2.46165e-12	4.40763	6	4.11551e-09
1020	2.32636e-12	4.40763	6	3.88924e-09
1022	2.18423e-12	4.40763	6	3.65155e-09
1024	2.03522e-12	4.40763	6	3.4024e-09
1026	1.87929e-12	4.40763	6	3.14172e-09
1028	1.71641e-12	4.40763	6	2.86944e-09
1030	1.54655e-12	4.40763	6	2.58552e-09
1032	1.52768e-12	4.40763	6	2.55399e-09
1034	1.5267e-12	4.40763	6	2.55235e-09
1036	1.52572e-12	4.40763	6	2.55071e-09
1038	1.52473e-12	4.40763	6	2.54907e-09
1040	1.52375e-12	4.40763	6	2.54743e-09
1042	1.52277e-12	4.40763	6	2.54579e-09
1044	1.52179e-12	4.40763	6	2.54414e-09
1046	1.52081e-12	4.40763	6	2.5425e-09
1048	1.51982e-12	4.40763	6	2.54086e-09
1050	1.51884e-12	4.40763	6	2.53922e-09
1052	1.51786e-12	4.40763	6	2.53758e-09
1054	1.51688e-12	4.40763	6	2.53594e-09
1056	1.5159e-12	4.40763	6	2.5343e-09
1058	1.51492e-12	4.40763	6	2.53265e-09
1060	1.51393e-12	4.40763	6	2.53101e-09
1062	1.51295e-12	4.40763	6	2.52937e-09
1064	1.51197e-12	4.40763	6	2.52773e-09
1066	1.51099e-12	4.40763	6	2.52609e-09
1068	1.51001e-12	4.40763	6	2.52445e-09
1070	1.50902e-12	4.40763	6	2.52281e-09
1072	1.50804e-12	4.40763	6	2.52116e-09
1074	1.50706e-12	4.40763	6	2.51952e-09
1076	1.50608e-12	4.40763	6	2.51788e-09
1078	1.5051e-12	4.40763	6	2.51624e-09
1080	1.50412e-12	4.40763	6	2.5146e-09
1082	1.50313e-12	4.40763	6	2.51296e-09
1084	1.50215e-12	4.40763	6	2.51132e-09
1086	1.50117e-12	4.40763	6	2.50967e-09
1088	1.50019e-12	4.40763	6	2.50803e-09
1090	1.49921e-12	4.40763	6	2.50639e-09
1092	1.49822e-12	4.40763	6	2.50475e-09
1094	1.49724e-12	4.40763	6	2.50311e-09
1096	1.49626e-12	4.40763	6	2.50147e-09
1098	1.49528e-12	4.40763	6	2.49983e-09
1100	1.4943e-12	4.40763	6	2.49818e-09
1102	1.49332e-12	4.40763	6	2.49654e-09
1104	1.49233e-12	4.40763	6	2.4949e-09
1106	1.49135e-12	4.40763	6	2.49326e-09
1108	1.49037e-12	4.40763	6	2.49162e-09
1110	1.48939e-12	4.40763	6	2.48998e-09
1112	1.48841e-12	4.40763	6	2.48834e-09
1114	1.48742e-12	4.40763	6	2.4867e-09
1116	1.48644e-12	4.40763	6	2.48505e-09
1118	1.48546e-12	4.40763	6	2.48341e-09
1120	1.48448e-12	4.40763	6	2.48177e-09
1122	1.4835e-12	4.40763	6	2.48013e-09
1124	1.48252e-12	4.40763	6	2.47849e-09
1126	1.48153e-12	4.40763	6	2.47685e-09
1128	1.48055e-12	4.40763	6	2.47521e-09
1130	1.47957e-12	4.40763	6	2.47356e-09
1132	1.47859e-12	4.40763	6	2.47192e-09
1134	1.47761e-12	4.40763	6	2.47028e-09
1136	1.47662e-12	4.40763	6	2.46864e-09
1138	1.47564e-12	4.40763	6	2.467e-09
1140	1.47466e-12	4.40763	6	2.46536e-09
1142	1.47368e-12	4.40763	6	2.46372e-09
1144	1.4727e-12	4.40763	6	2.46207e-09
1146	1.47172e-12	4.40763	6	2.46043e-09
1148	1.47073e-12	4.40763	6	2.45879e-09
1150	1.46975e-12	4.40763	6	2.45715e-09
1152	1.46877e-12	4.40763	6	2.45551e-09
1154	1.46779e-12	4.40763	6	2.45387e-09
1156	1.46681e-12	4.40763	6	2.45223e-09
1158	1.46582e-12	4.40763	6	2.45058e-09
1160	1.46484e-12	4.40763	6	2.44894e-09
1162	1.46386e-12	4.40763	6	2.4473e-09
1164	1.46288e-12	4.40763	6	2.44566e-09
1166	1.4619e-12	4.40763	6	2.44402e-09
1168	1.46092e-12	4.40763	6	2.44238e-09
1170	1.45993e-12	4.40763	6	2.44074e-09
1172	1.45895e-12	4.40763	6	2.43909e-09
1174	1.45797e-12	4.40763	6	2.43745e-09
1176	1.45699e-12	4.40763	6	2.43581e-09
1178	1.45601e-12	4.40763	6	2.43417e-09
1180	1.45502e-12	4.40763	6	2.43253e-09
1182	1.45404e-12	4.40763	6	2.43089e-09
1184	1.45306e-12	4.40763	6	2.42925e-09
1186	1.45208e-12	4.40763	6	2.4276e-09
1188	1.4511e-12	4.40763	6	2.42596e-09
1190	1.45012e-12	4.40763	6	2.42432e-09
1192	1.44913e-12	4.40763	6	2.42268e-09
1194	1.44815e-12	4.40763	6	2.42104e-09
1196	1.44717e-12	4.40763	6	2.4194e-09
1198	1.44619e-12	4.40763	6	2.41776e-09
1200	1.44521e-12	4.40763	6	2.41611e-09
1202	1.44422e-12	4.40763	6	2.41447e-09
1204	1.44324e-12	4.40763	6	2.41283e-09
1206	1.44226e-12	4.40763	6	2.41119e-09
1208	1.44128e-12	4.40763	6	2.40955e-09
1210	1.4403e-12	4.40763	6	2.40791e-09
1212	1.43932e-12	4.40763	6	2.40627e-09
1214	1.43833e-12	4.40763	6	2.40462e-09
1216	1.43735e-12	4.40763	6	2.40298e-09
1218	1.43637e-12	4.40763	6	2.40134e-09
1220	1.43539e-12	4.40763	6	2.3997e-09
1222	1.43441e-12	4.40763	6	2.39806e-09
1224	1.43342e-12	4.40763	6	2.39642e-09
1226	1.43244e-12	4.40763	6	2.39478e-09
1228	1.43146e-12	4.40763	6	2.39313e-09
1230	1.43048e-12	4.40763	6	2.39149e-09
1232	1.4295e-12	4.40763	6	2.38985e-09
1234	1.42852e-12	4.40763	6	2.38821e-09
1236	1.42753e-12	4.40763	6	2.38657e-09
1238	1.42655e-12	4.40763	6	2.38493e-09
1240	1.42557e-12	4.40763	6	2.38329e-09
1242	1.42459e-12	4.40763	6	2.38164e-09
1244	1.42361e-12	4.40763	6	2.38e-09
1246	1.42262e-12	4.40763	6	2.37836e-09
1248	1.42164e-12	4.40763	6	2.37672e-09
1250	1.42066e-12	4.40763	6	2.37508e-09
1252	1.41968e-12	4.40763	6	2.37344e-09
1254	1.4187e-12	4.40763	6	2.3718e-09
1256	1.41772e-12	4.40763	6	2.37015e-09
1258	1.41673e-12	4.40763	6	2.36851e-09
1260	1.41575e-12	4.40763	6	2.36687e-09
1262	1.41477e-12	4.40763	6	2.36523e-09
1264	1.41379e-12	4.40763	6	2.36359e-09
1266	1.41281e-12	4.40763	6	2.36195e-09
1268	1.41182e-12	4.40763	6	2.36031e-09
1270	1.41084e-12	4.40763	6	2.35866e-09
1272	1.40986e-12	4.40763	6	2.35702e-09
1274	1.40888e-12	4.40763	6	2.35538e-09
1276	1.4079e-12	4.40763	6	2.35374e-09
1278	1.40692e-12	4.40763	6	2.3521e-09
1280	1.40593e-12	4.40763	6	2.35046e-09
1282	1.40495e-12	4.40763	6	2.34882e-09
1284	1.40397e-12	4.40763	6	2.34718e-09
1286	1.40299e-12	4.40763	6	2.34553e-09
1288	1.40201e-12	4.40763	6	2.34389e-09
1290	1.40102e-12	4.40763	6	2.34225e-09
1292	1.40004e-12	4.40763	6	2.34061e-09
1294	1.39906e-12	4.40763	6	2.33897e-09
1296	1.39808e-12	4.40763	6	2.33733e-09
1298	1.3971e-12	4.40763	6	2.33569e-09
1300	1.39612e-12	4.40763	6	2.33404e-09
1302	1.39513e-12	4.40763	6	2.3324e-09
1304	1.39415e-12	4.40763	6	2.33076e-09
1306	1.39317e-12	4.40763	6	2.32912e-09
1308	1.39219e-12	4.40763	6	2.32748e-09
1310	1.39121e-12	4.40763	6	2.32584e-09
1312	1.39022e-12	4.40763	6	2.3242e-09
1314	1.38924e-12	4.40763	6	2.32255e-09
1316	1.38826e-12	4.40763	6	2.32091e-09
1318	1.38728e-12	4.40763	6	2.31927e-09
1320	1.3863e-12	4.40763	6	2.31763e-09
1322	1.38532e-12	4.40763	6	2.31599e-09
1324	1.38433e-12	4.40763	6	2.31435e-09
1326	1.38335e-12	4.40763	6	2.31271e-09
1328	1.38237e-12	4.40763	6	2.31106e-09
1330	1.38139e-12	4.40763	6	2.30942e-09
1332	1.38041e-12	4.40763	6	2.30778e-09
1334	1.37942e-12	4.40763	6	2.30614e-09
1336	1.37844e-12	4.40763	6	2.3045e-09
1338	1.37746e-12	4.40763	6	2.30286e-09
1340	1.37648e-12	4.40763	6	2.30122e-09
1342	1.3755e-12	4.40763	6	2.29957e-09
1344	1.37452e-12	4.40763	6	2.29793e-09
1346	1.37353e-12	4.40763	6	2.29629e-09
1348	1.37255e-12	4.40763	6	2.29465e-09
1350	1.37157e-12	4.40763	6	2.29301e-09
1352	1.37059e-12	4.40763	6	2.29137e-09
1354	1.36961e-12	4.40763	6	2.28973e-09
1356	1.36862e-12	4.40763	6	2.28808e-09
1358	1.36764e-12	4.40763	6	2.28644e-09
1360	1.36666e-12	4.40763	6	2.2848e-09
1362	1.36568e-12	4.40763	6	2.28316e-09
1364	1.3647e-12	4.40763	6	2.28152e-09
1366	1.36372e-12	4.40763	6	2.27988e-09
1368	1.36273e-12	4.40763	6	2.27824e-09
1370	1.36175e-12	4.40763	6	2.27659e-09
1372	1.36077e-12	4.40763	6	2.27495e-09
1374	1.35979e-12	4.40763	6	2.27331e-09
1376	1.35881e-12	4.40763	6	2.27167e-09
1378	1.35782e-12	4.40763	6	2.27003e-09
1380	1.35684e-12	4.40763	6	2.26839e-09
1382	1.35586e-12	4.40763	6	2.26675e-09
1384	1.35488e-12	4.40763	6	2.2651e-09
1386	1.3539e-12	4.40763	6	2.26346e-09
1388	1.35292e-12	4.40763	6	2.26182e-09
1390	1.35193e-12	4.40763	6	2.26018e-09
1392	1.35095e-12	4.40763	6	2.25854e-09
1394	1.34997e-12	4.40763	6	2.2569e-09
1396	1.34899e-12	4.40763	6	2.25526e-09
1398	1.34801e-12	4.40763	6	2.25361e-09
1400	1.34702e-12	4.40763	6	2.25197e-09
1402	1.34604e-12	4.40763	6	2.25033e-09
1404	1.34506e-12	4.40763	6	2.24869e-09
1406	1.34408e-12	4.40763	6	2.24705e-09
1408	1.3431e-12	4.40763	6	2.24541e-09
1410	1.34212e-12	4.40763	6	2.24377e-09
1412	1.34113e-12	4.40763	6	2.24212e-09
1414	1.34015e-12	4.40763	6	2.24048e-09
1416	1.33917e-12	4.40763	6	2.23884e-09
1418	1.33819e-12	4.40763	6	2.2372e-09
1420	1.33721e-12	4.40763	6	2.23556e-09
1422	1.33622e-12	4.40763	6	2.23392e-09
1424	1.33524e-12	4.40763	6	2.23228e-09
1426	1.33426e-12	4.40763	6	2.23063e-09
1428	1.33328e-12	4.40763	6	2.22899e-09
1430	1.3323e-12	4.40763	6	2.22735e-09
1432	1.33132e-12	4.40763	6	2.22571e-09
1434	1.33033e-12	4.40763	6	2.22407e-09
1436	1.32935e-12	4.40763	6	2.22243e-09
1438	1.32837e-12	4.40763	6	2.22079e-09
1440	1.32739e-12	4.40763	6	2.21914e-09
1442	1.32641e-12	4.40763	6	2.2175e-09
1444	1.32542e-12	4.40763	6	2.21586e-09
1446	1.32444e-12	4.40763	6	2.21422e-09
1448	1.32346e-12	4.40763	6	2.21258e-09
1450	1.32248e-12	4.40763	6	2.21094e-09
1452	1.3215e-12	4.40763	6	2.2093e-09
1454	1.32052e-12	4.40763	6	2.20766e-09
1456	1.31953e-12	4.40763	6	2.20601e-09
1458	1.31855e-12	4.40763	6	2.20437e-09
1460	1.31757e-12	4.40763	6	2.20273e-09
1462	1.31659e-12	4.40763	6	2.20109e-09
1464	1.31561e-12	4.40763	6	2.19945e-09
1466	1.31463e-12	4.40763	6	2.19781e-09
1468	1.31364e-12	4.40763	6	2.19617e-09
1470	1.31266e-12	4.40763	6	2.19452e-09
1472	1.31168e-12	4.40763	6	2.19288e-09
1474	1.3107e-12	4.40763	6	2.19124e-09
1476	1.30972e-12	4.40763	6	2.1896e-09
1478	1.30873e-12	4.40763	6	2.18796e-09
1480	1.30775e-12	4.40763	6	2.18632e-09
1482	1.30677e-12	4.40763	6	2.18468e-09
1484	1.30579e-12	4.40763	6	2.18303e-09
1486	1.30481e-12	4.40763	6	2.18139e-09
1488	1.30383e-12	4.40763	6	2.17975e-09
1490	1.30284e-12	4.40763	6	2.17811e-09
1492	1.30186e-12	4.40763	6	2.17647e-09
1494	1.30088e-12	4.40763	6	2.17483e-09
1496	1.2999e-12	4.40763	6	2.17319e-09
1498	1.29892e-12	4.40763	6	2.17154e-09
1500	1.29793e-12	4.40763	6	2.1699e-09
1502	1.29695e-12	4.40763	6	2.16826e-09
1504	1.29597e-12	4.40763	6	2.16662e-09
1506	1.29499e-12	4.40763	6	2.16498e-09
1508	1.29401e-12	4.40763	6	2.16334e-09
1510	1.29303e-12	4.40763	6	2.1617e-09
1512	1.29204e-12	4.40763	6	2.16005e-09
1514	1.29106e-12	4.40763	6	2.15841e-09
1516	1.29008e-12	4.40763	6	2.15677e-09
1518	1.2891e-12	4.40763	6	2.15513e-09
1520	1.28812e-12	4.40763	6	2.15349e-09
1522	1.28713e-12	4.40763	6	2.15185e-09
1524	1.28615e-12	4.40763	6	2.15021e-09
1526	1.28517e-12	4.40763	6	2.14856e-09
1528	1.28419e-12	4.40763	6	2.14692e-09
1530	1.28321e-12	4.40763	6	2.14528e-09
1532	1.28223e-12	4.40763	6	2.14364e-09
1534	1.28124e-12	4.40763	6	2.142e-09
1536	1.28026e-12	4.40763	6	2.14036e-09
1538	1.27928e-12	4.40763	6	2.13872e-09
1540	1.2783e-12	4.40763	6	2.13707e-09
1542	1.27732e-12	4.40763	6	2.13543e-09
1544	1.27633e-12	4.40763	6	2.13379e-09
1546	1.27535e-12	4.40763	6	2.13215e-09
1548	1.27437e-12	4.40763	6	2.13051e-09
1550	1.27339e-12	4.40763	6	2.12887e-09
1552	1.27241e-12	4.40763	6	2.12723e-09
1554	1.27143e-12	4.40763	6	2.12558e-09
1556	1.27044e-12	4.40763	6	2.12394e-09
1558	1.26946e-12	4.40763	6	2.1223e-09
1560	1.26848e-12	4.40763	6	2.12066e-09
1562	1.2675e-12	4.40763	6	2.11902e-09
1564	1.26652e-12	4.40763	6	2.11738e-09
1566	1.26553e-12	4.40763	6	2.11574e-09
1568	1.26455e-12	4.40763	6	2.11409e-09
1570	1.26357e-12	4.40763	6	2.11245e-09
1572	1.26259e-12	4.40763	6	2.11081e-09
1574	1.26161e-12	4.40763	6	2.10917e-09
1576	1.26063e-12	4.40763	6	2.10753e-09
1578	1.25964e-12	4.40763	6	2.10589e-09
1580	1.25866e-12	4.40763	6	2.10425e-09
1582	1.25768e-12	4.40763	6	2.1026e-09
1584	1.2567e-12	4.40763	6	2.10096e-09
1586	1.25572e-12	4.40763	6	2.09932e-09
1588	1.25473e-12	4.40763	6	2.09768e-09
1590	1.25375e-12	4.40763	6	2.09604e-09
1592	1.25277e-12	4.40763	6	2.0944e-09
1594	1.25179e-12	4.40763	6	2.09276e-09
1596	1.25081e-12	4.40763	6	2.09111e-09
1598	1.24983e-12	4.40763	6	2.08947e-09
1600	1.24884e-12	4.40763	6	2.08783e-09
1602	1.24786e-12	4.40763	6	2.08619e-09
1604	1.24688e-12	4.40763	6	2.08455e-09
1606	1.2459e-12	4.40763	6	2.08291e-09
1608	1.24492e-12	4.40763	6	2.08127e-09
1610	1.24393e-12	4.40763	6	2.07962e-09
1612	1.24295e-12	4.40763	6	2.07798e-09
1614	1.24197e-12	4.40763	6	2.07634e-09
1616	1.24099e-12	4.40763	6	2.0747e-09
1618	1.24001e-12	4.40763	6	2.07306e-09
1620	1.23903e-12	4.40763	6	2.07142e-09
1622	1.23804e-12	4.40763	6	2.06978e-09
1624	1.23706e-12	4.40763	6	2.06814e-09
1626	1.23608e-12	4.40763	6	2.06649e-09
1628	1.2351e-12	4.40763	6	2.06485e-09
1630	1.23412e-12	4.40763	6	2.06321e-09
1632	1.23313e-12	4.40763	6	2.06157e-09
1634	1.23215e-12	4.40763	6	2.05993e-09
1636	1.23117e-12	4.40763	6	2.05829e-09
1638	1.23019e-12	4.40763	6	2.05665e-09
1640	1.22921e-12	4.40763	6	2.055e-09
1642	1.22823e-12	4.40763	6	2.05336e-09
1644	1.22724e-12	4.40763	6	2.05172e-09
1646	1.22626e-12	4.40763	6	2.05008e-09
1648	1.22528e-12	4.40763	6	2.04844e-09
1650	1.2243e-12	4.40763	6	2.0468e-09
1652	1.22332e-12	4.40763	6	2.04516e-09
1654	1.22233e-12	4.40763	6	2.04351e-09
1656	1.22135e-12	4.40763	6	2.04187e-09
1658	1.22037e-12	4.40763	6	2.04023e-09
1660	1.21939e-12	4.40763	6	2.03859e-09
1662	1.21841e-12	4.40763	6	2.03695e-09
1664	1.21743e-12	4.40763	6	2.03531e-09
1666	1.21644e-12	4.40763	6	2.03367e-09
1668	1.21546e-12	4.40763	6	2.03202e-09
1670	1.21448e-12	4.40763	6	2.03038e-09
1672	1.2135e-12	4.40763	6	2.02874e-09
1674	1.21252e-12	4.40763	6	2.0271e-09
1676	1.21153e-12	4.40763	6	2.02546e-09
1678	1.21055e-12	4.40763	6	2.02382e-09
1680	1.20957e-12	4.40763	6	2.02218e-09
1682	1.20859e-12	4.40763	6	2.02053e-09
1684	1.20761e-12	4.40763	6	2.01889e-09
1686	1.20663e-12	4.40763	6	2.01725e-09
1688	1.20564e-12	4.40763	6	2.01561e-09
1690	1.20466e-12	4.40763	6	2.01397e-09
1692	1.20368e-12	4.40763	6	2.01233e-09
1694	1.2027e-12	4.40763	6	2.01069e-09
1696	1.20172e-12	4.40763	6	2.00904e-09
1698	1.20073e-12	4.40763	6	2.0074e-09
1700	1.19975e-12	4.40763	6	2.00576e-09
1702	1.19877e-12	4.40763	6	2.00412e-09
1704	1.19779e-12	4.40763	6	2.00248e-09
1706	1.19681e-12	4.40763	6	2.00084e-09
1708	1.19583e-12	4.40763	6	1.9992e-09
1710	1.19484e-12	4.40763	6	1.99755e-09
1712	1.19386e-12	4.40763	6	1.99591e-09
1714	1.19288e-12	4.40763	6	1.99427e-09
1716	1.1919e-12	4.40763	6	1.99263e-09
1718	1.19092e-12	4.40763	6	1.99099e-09
1720	1.18993e-12	4.40763	6	1.98935e-09
1722	1.18895e-12	4.40763	6	1.98771e-09
1724	1.18797e-12	4.40763	6	1.98606e-09
1726	1.18699e-12	4.40763	6	1.98442e-09
1728	1.18601e-12	4.40763	6	1.98278e-09
1730	1.18503e-12	4.40763	6	1.98114e-09
1732	1.18404e-12	4.40763	6	1.9795e-09
1734	1.18306e-12	4.40763	6	1.97786e-09
1736	1.18208e-12	4.40763	6	1.97622e-09
1738	1.1811e-12	4.40763	6	1.97457e-09
1740	1.18012e-12	4.40763	6	1.97293e-09
1742	1.17913e-12	4.40763	6	1.97129e-09
1744	1.17815e-12	4.40763	6	1.96965e-09
1746	1.17717e-12	4.40763	6	1.96801e-09
1748	1.17619e-12	4.40763	6	1.96637e-09
1750	1.17521e-12	4.40763	6	1.96473e-09
1752	1.17423e-12	4.40763	6	1.96308e-09
1754	1.17324e-12	4.40763	6	1.96144e-09
1756	1.17226e-12	4.40763	6	1.9598e-09
1758	1.17128e-12	4.40763	6	1.95816e-09
1760	1.1703e-12	4.40763	6	1.95652e-09
1762	1.16932e-12	4.40763	6	1.95488e-09
1764	1.16833e-12	4.40763	6	1.95324e-09
1766	1.16735e-12	4.40763	6	1.95159e-09
1768	1.16637e-12	4.40763	6	1.94995e-09
1770	1.16539e-12	4.40763	6	1.94831e-09
1772	1.16441e-12	4.40763	6	1.94667e-09
1774	1.16343e-12	4.40763	6	1.94503e-09
1776	1.16244e-12	4.40763	6	1.94339e-09
1778	1.16146e-12	4.40763	6	1.94175e-09
1780	1.16048e-12	4.40763	6	1.9401e-09
1782	1.1595e-12	4.40763	6	1.93846e-09
1784	1.15852e-12	4.40763	6	1.93682e-09
1786	1.15753e-12	4.40763	6	1.93518e-09
1788	1.15655e-12	4.40763	6	1.93354e-09
1790	1.15557e-12	4.40763	6	1.9319e-09
1792	1.15459e-12	4.40763	6	1.93026e-09
1794	1.15361e-12	4.40763	6	1.92862e-09
1796	1.15263e-12	4.40763	6	1.92697e-09
1798	1.15164e-12	4.40763	6	1.92533e-09
1800	1.15066e-12	4.40763	6	1.92369e-09
1802	1.14968e-12	4.40763	6	1.92205e-09
1804	1.1487e-12	4.40763	6	1.92041e-09
1806	1.14772e-12	4.40763	6	1.91877e-09
1808	1.14673e-12	4.40763	6	1.91713e-09
1810	1.14575e-12	4.40763	6	1.91548e-09
1812	1.14477e-12	4.40763	6	1.91384e-09
1814	1.14379e-12	4.40763	6	1.9122e-09
1816	1.14281e-12	4.40763	6	1.91056e-09
1818	1.14183e-12	4.40763	6	1.90892e-09
1820	1.14084e-12	4.40763	6	1.90728e-09
1822	1.13986e-12	4.40763	6	1.90564e-09
1824	1.13888e-12	4.40763	6	1.90399e-09
1826	1.1379e-12	4.40763	6	1.90235e-09
1828	1.13692e-12	4.40763	6	1.90071e-09
1830	1.13593e-12	4.40763	6	1.89907e-09
1832	1.13495e-12	4.40763	6	1.89743e-09
1834	1.13397e-12	4.40763	6	1.89579e-09
1836	1.13299e-12	4.40763	6	1.89415e-09
1838	1.13201e-12	4.40763	6	1.8925e-09
1840	1.13103e-12	4.40763	6	1.89086e-09
1842	1.13004e-12	4.40763	6	1.88922e-09
1844	1.12906e-12	4.40763	6	1.88758e-09
1846	1.12808e-12	4.40763	6	1.88594e-09
1848	1.1271e-12	4.40763	6	1.8843e-09
1850	1.12612e-12	4.40763	6	1.88266e-09
1852	1.12513e-12	4.40763	6	1.88101e-09
1854	1.12415e-12	4.40763	6	1.87937e-09
1856	1.12317e-12	4.40763	6	1.87773e-09
1858	1.12219e-12	4.40763	6	1.87609e-09
1860	1.12121e-12	4.40763	6	1.87445e-09
1862	1.12023e-12	4.40763	6	1.87281e-09
1864	1.11924e-12	4.40763	6	1.87117e-09
1866	1.11826e-12	4.40763	6	1.86952e-09
1868	1.11728e-12	4.40763	6	1.86788e-09
1870	1.1163e-12	4.40763	6	1.86624e-09
1872	1.11532e-12	4.40763	6	1.8646e-09
1874	1.11433e-12	4.40763	6	1.86296e-09
1876	1.11335e-12	4.40763	6	1.86132e-09
1878	1.11237e-12	4.40763	6	1.85968e-09
1880	1.11139e-12	4.40763	6	1.85803e-09
1882	1.11041e-12	4.40763	6	1.85639e-09
1884	1.10943e-12	4.40763	6	1.85475e-09
1886	1.10844e-12	4.40763	6	1.85311e-09
1888	1.10746e-12	4.40763	6	1.85147e-09
1890	1.10648e-12	4.40763	6	1.84983e-09
1892	1.1055e-12	4.40763	6	1.84819e-09
1894	1.10452e-12	4.40763	6	1.84654e-09
1896	1.10353e-12	4.40763	6	1.8449e-09
1898	1.10255e-12	4.40763	6	1.84326e-09
1900	1.10157e-12	4.40763	6	1.84162e-09
1902	1.10059e-12	4.40763	6	1.83998e-09
1904	1.09961e-12	4.40763	6	1.83834e-09
1906	1.09863e-12	4.40763	6	1.8367e-09
1908	1.09764e-12	4.40763	6	1.83505e-09
1910	1.09666e-12	4.40763	6	1.83341e-09
1912	1.09568e-12	4.40763	6	1.83177e-09
1914	1.0947e-12	4.40763	6	1.83013e-09
1916	1.09372e-12	4.40763	6	1.82849e-09
1918	1.09273e-12	4.40763	6	1.82685e-09
1920	1.09175e-12	4.40763	6	1.82521e-09
1922	1.09077e-12	4.40763	6	1.82356e-09
1924	1.08979e-12	4.40763	6	1.82192e-09
1926	1.08881e-12	4.40763	6	1.82028e-09
1928	1.08783e-12	4.40763	6	1.81864e-09
1930	1.08684e-12	4.40763	6	1.817e-09
1932	1.08586e-12	4.40763	6	1.81536e-09
1934	1.08488e-12	4.40763	6	1.81372e-09
1936	1.0839e-12	4.40763	6	1.81207e-09
1938	1.08292e-12	4.40763	6	1.81043e-09
1940	1.08193e-12	4.40763	6	1.80879e-09
1942	1.08095e-12	4.40763	6	1.80715e-09
1944	1.07997e-12	4.40763	6	1.80551e-09
1946	1.07899e-12	4.40763	6	1.80387e-09
1948	1.07801e-12	4.40763	6	1.80223e-09
1950	1.07703e-12	4.40763	6	1.80058e-09
1952	1.07604e-12	4.40763	6	1.79894e-09
1954	1.07506e-12	4.40763	6	1.7973e-09
1956	1.07408e-12	4.40763	6	1.79566e-09
1958	1.0731e-12	4.40763	6	1.79402e-09
1960	1.07212e-12	4.40763	6	1.79238e-09
1962	1.07113e-12	4.40763	6	1.79074e-09
1964	1.07015e-12	4.40763	6	1.7891e-09
1966	1.06917e-12	4.40763	6	1.78745e-09
1968	1.06819e-12	4.40763	6	1.78581e-09
1970	1.06721e-12	4.40763	6	1.78417e-09
1972	1.06623e-12	4.40763	6	1.78253e-09
1974	1.06524e-12	4.40763	6	1.78089e-09
1976	1.06426e-12	4.40763	6	1.77925e-09
1978	1.06328e-12	4.40763	6	1.77761e-09
1980	1.0623e-12	4.40763	6	1.77596e-09
1982	1.06132e-12	4.40763	6	1.77432e-09
1984	1.06033e-12	4.40763	6	1.77268e-09
1986	1.05935e-12	4.40763	6	1.77104e-09
1988	1.05837e-12	4.40763	6	1.7694e-09
1990	1.05739e-12	4.40763	6	1.76776e-09
1992	1.05641e-12	4.40763	6	1.76612e-09
1994	1.05543e-12	4.40763	6	1.76447e-09
1996	1.05444e-12	4.40763	6	1.76283e-09
1998	1.05346e-12	4.40763	6	1.76119e-09
2000	1.05248e-12	4.40763	6	1.75955e-09
2002	1.0515e-12	4.40763	6	1.75791e-09
2004	1.05052e-12	4.40763	6	1.75627e-09
2006	1.04953e-12	4.40763	6	1.75463e-09
2008	1.04855e-12	4.40763	6	1.75298e-09
2010	1.04757e-12	4.40763	6	1.75134e-09
2012	1.04659e-12	4.40763	6	1.7497e-09
2014	1.04561e-12	4.40763	6	1.74806e-09
2016	1.04463e-12	4.40763	6	1.74642e-09
2018	1.04364e-12	4.40763	6	1.74478e-09
2020	1.04266e-12	4.40763	6	1.74314e-09
2022	1.04168e-12	4.40763	6	1.74149e-09
2024	1.0407e-12	4.40763	6	1.73985e-09
2026	1.03972e-12	4.40763	6	1.73821e-09
2028	1.03873e-12	4.40763	6	1.73657e-09
2030	1.03775e-12	4.40763	6	1.73493e-09
2032	1.03677e-12	4.40763	6	1.73329e-09
2034	1.03579e-12	4.40763	6	1.73165e-09
2036	1.03481e-12	4.40763	6	1.73e-09
2038	1.03383e-12	4.40763	6	1.72836e-09
2040	1.03284e-12	4.40763	6	1.72672e-09
2042	1.03186e-12	4.40763	6	1.72508e-09
2044	1.03088e-12	4.40763	6	1.72344e-09
2046	1.0299e-12	4.40763	6	1.7218e-09
2048	1.02892e-12	4.40763	6	1.72016e-09
2050	1.02793e-12	4.40763	6	1.71851e-09
2052	1.02695e-12	4.40763	6	1.71687e-09
2054	1.02597e-12	4.40763	6	1.71523e-09
2056	1.02499e-12	4.40763	6	1.71359e-09
2058	1.02401e-12	4.40763	6	1.71195e-09
2060	1.02303e-12	4.40763	6	1.71031e-09
2062	1.02204e-12	4.40763	6	1.70867e-09
2064	1.02106e-12	4.40763	6	1.70702e-09
2066	1.02008e-12	4.40763	6	1.70538e-09
2068	1.0191e-12	4.40763	6	1.70374e-09
2070	1.01812e-12	4.40763	6	1.7021e-09
2072	1.01713e-12	4.40763	6	1.70046e-09
2074	1.01615e-12	4.40763	6	1.69882e-09
2076	1.01517e-12	4.40763	6	1.69718e-09
2078	1.01419e-12	4.40763	6	1.69553e-09
2080	1.01321e-12	4.40763	6	1.69389e-09
2082	1.01223e-12	4.40763	6	1.69225e-09
2084	1.01124e-12	4.40763	6	1.69061e-09
2086	1.01026e-12	4.40763	6	1.68897e-09
2088	1.00928e-12	4.40763	6	1.68733e-09
2090	1.0083e-12	4.40763	6	1.68569e-09
2092	1.00732e-12	4.40763	6	1.68404e-09
2094	1.00633e-12	4.40763	6	1.6824e-09
2096	1.00535e-12	4.40763	6	1.68076e-09
2098	1.00437e-12	4.40763	6	1.67912e-09
2100	1.00339e-12	4.40763	6	1.67748e-09
2102	1.00241e-12	4.40763	6	1.67584e-09
2104	1.00143e-12	4.40763	6	1.6742e-09
2106	1.00044e-12	4.40763	6	1.67255e-09
2108	9.99462e-13	4.40763	6	1.67091e-09
2110	9.9848e-13	4.40763	6	1.66927e-09
2112	9.97499e-13	4.40763	6	1.66763e-09
2114	9.96517e-13	4.40763	6	1.66599e-09
2116	9.95535e-13	4.40763	6	1.66435e-09
2118	9.94553e-13	4.40763	6	1.66271e-09
2120	9.93571e-13	4.40763	6	1.66106e-09
2122	9.92589e-13	4.40763	6	1.65942e-09
2124	9.91608e-13	4.40763	6	1.65778e-09
2126	9.90626e-13	4.40763	6	1.65614e-09
2128	9.89644e-13	4.40763	6	1.6545e-09
2130	9.88662e-13	4.40763	6	1.65286e-09
2132	9.8768e-13	4.40763	6	1.65122e-09
2134	9.86699e-13	4.40763	6	1.64958e-09
2136	9.85717e-13	4.40763	6	1.64793e-09
2138	9.84735e-13	4.40763	6	1.64629e-09
2140	9.83753e-13	4.40763	6	1.64465e-09
2142	9.82771e-13	4.40763	6	1.64301e-09
2144	9.81789e-13	4.40763	6	1.64137e-09
2146	9.80808e-13	4.40763	6	1.63973e-09
2148	9.79826e-13	4.40763	6	1.63809e-09
2150	9.78844e-13	4.40763	6	1.63644e-09
2152	9.77862e-13	4.40763	6	1.6348e-09
2154	9.7688e-13	4.40763	6	1.63316e-09
2156	9.75899e-13	4.40763	6	1.63152e-09
2158	9.74917e-13	4.40763	6	1.62988e-09
2160	9.73935e-13	4.40763	6	1.62824e-09
2162	9.72953e-13	4.40763	6	1.6266e-09
2164	9.71971e-13	4.40763	6	1.62495e-09
2166	9.7099e-13	4.40763	6	1.62331e-09
2168	9.70008e-13	4.40763	6	1.62167e-09
2170	9.69026e-13	4.40763	6	1.62003e-09
2172	9.68044e-13	4.40763	6	1.61839e-09
2174	9.67062e-13	4.40763	6	1.61675e-09
2176	9.6608e-13	4.40763	6	1.61511e-09
2178	9.65099e-13	4.40763	6	1.61346e-09
2180	9.64117e-13	4.40763	6	1.61182e-09
2182	9.63135e-13	4.40763	6	1.61018e-09
2184	9.62153e-13	4.40763	6	1.60854e-09
2186	9.61171e-13	4.40763	6	1.6069e-09
2188	9.6019e-13	4.40763	6	1.60526e-09
2190	9.59208e-13	4.40763	6	1.60362e-09
2192	9.58226e-13	4.40763	6	1.60197e-09
2194	9.57244e-13	4.40763	6	1.60033e-09
2196	9.56262e-13	4.40763	6	1.59869e-09
2198	9.5528e-13	4.40763	6	1.59705e-09
2200	9.54299e-13	4.40763	6	1.59541e-09
2202	9.53317e-13	4.40763	6	1.59377e-09
2204	9.52335e-13	4.40763	6	1.59213e-09
2206	9.51353e-13	4.40763	6	1.59048e-09
2208	9.50371e-13	4.40763	6	1.58884e-09
2210	9.4939e-13	4.40763	6	1.5872e-09
2212	9.48408e-13	4.40763	6	1.58556e-09
2214	9.47426e-13	4.40763	6	1.58392e-09
2216	9.46444e-13	4.40763	6	1.58228e-09
2218	9.45462e-13	4.40763	6	1.58064e-09
2220	9.4448e-13	4.40763	6	1.57899e-09
2222	9.43499e-13	4.40763	6	1.57735e-09
2224	9.42517e-13	4.40763	6	1.57571e-09
2226	9.41535e-13	4.40763	6	1.57407e-09
2228	9.40553e-13	4.40763	6	1.57243e-09
2230	9.39571e-13	4.40763	6	1.57079e-09
2232	9.3859e-13	4.40763	6	1.56915e-09
2234	9.37608e-13	4.40763	6	1.5675e-09
2236	9.36626e-13	4.40763	6	1.56586e-09
2238	9.35644e-13	4.40763	6	1.56422e-09
2240	9.34662e-13	4.40763	6	1.56258e-09
2242	9.33681e-13	4.40763	6	1.56094e-09
2244	9.32699e-13	4.40763	6	1.5593e-09
2246	9.31717e-13	4.40763	6	1.55766e-09
2248	9.30735e-13	4.40763	6	1.55601e-09
2250	9.29753e-13	4.40763	6	1.55437e-09
2252	9.28771e-13	4.40763	6	1.55273e-09
2254	9.2779e-13	4.40763	6	1.55109e-09
2256	9.26808e-13	4.40763	6	1.54945e-09
2258	9.25826e-13	4.40763	6	1.54781e-09
2260	9.24844e-13	4.40763	6	1.54617e-09
2262	9.23862e-13	4.40763	6	1.54452e-09
2264	9.22881e-13	4.40763	6	1.54288e-09
2266	9.21899e-13	4.40763	6	1.54124e-09
2268	9.20917e-13	4.40763	6	1.5396e-09
2270	9.19935e-13	4.40763	6	1.53796e-09
2272	9.18953e-13	4.40763	6	1.53632e-09
2274	9.17971e-13	4.40763	6	1.53468e-09
2276	9.1699e-13	4.40763	6	1.53303e-09
2278	9.16008e-13	4.40763	6	1.53139e-09
2280	9.15026e-13	4.40763	6	1.52975e-09
2282	9.14044e-13	4.40763	6	1.52811e-09
2284	9.13062e-13	4.40763	6	1.52647e-09
2286	9.12081e-13	4.40763	6	1.52483e-09
2288	9.11099e-13	4.40763	6	1.52319e-09
2290	9.10117e-13	4.40763	6	1.52154e-09
2292	9.09135e-13	4.40763	6	1.5199e-09
2294	9.08153e-13	4.40763	6	1.51826e-09
2296	9.07172e-13	4.40763	6	1.51662e-09
2298	9.0619e-13	4.40763	6	1.51498e-09
2300	9.05208e-13	4.40763	6	1.51334e-09
2302	9.04226e-13	4.40763	6	1.5117e-09
2304	9.03244e-13	4.40763	6	1.51006e-09
2306	9.02262e-13	4.40763	6	1.50841e-09
2308	9.01281e-13	4.40763	6	1.50677e-09
2310	9.00299e-13	4.40763	6	1.50513e-09
2312	8.99317e-13	4.40763	6	1.50349e-09
2314	8.98335e-13	4.40763	6	1.50185e-09
2316	8.97353e-13	4.40763	6	1.50021e-09
2318	8.96372e-13	4.40763	6	1.49857e-09
2320	8.9539e-13	4.40763	6	1.49692e-09
2322	8.94408e-13	4.40763	6	1.49528e-09
2324	8.93426e-13	4.40763	6	1.49364e-09
2326	8.92444e-13	4.40763	6	1.492e-09
2328	8.91462e-13	4.40763	6	1.49036e-09
2330	8.90481e-13	4.40763	6	1.48872e-09
2332	8.89499e-13	4.40763	6	1.48708e-09
2334	8.88517e-13	4.40763	6	1.48543e-09
2336	8.87535e-13	4.40763	6	1.48379e-09
2338	8.86553e-13	4.40763	6	1.48215e-09
2340	8.85572e-13	4.40763	6	1.48051e-09
2342	8.8459e-13	4.40763	6	1.47887e-09
2344	8.83608e-13	4.40763	6	1.47723e-09
2346	8.82626e-13	4.40763	6	1.47559e-09
2348	8.81644e-13	4.40763	6	1.47394e-09
2350	8.80662e-13	4.40763	6	1.4723e-09
2352	8.79681e-13	4.40763	6	1.47066e-09
2354	8.78699e-13	4.40763	6	1.46902e-09
2356	8.77717e-13	4.40763	6	1.46738e-09
2358	8.76735e-13	4.40763	6	1.46574e-09
2360	8.75753e-13	4.40763	6	1.4641e-09
2362	8.74772e-13	4.40763	6	1.46245e-09
2364	8.7379e-13	4.40763	6	1.46081e-09
2366	8.72808e-13	4.40763	6	1.45917e-09
2368	8.71826e-13	4.40763	6	1.45753e-09
2370	8.70844e-13	4.40763	6	1.45589e-09
2372	8.69863e-13	4.40763	6	1.45425e-09
2374	8.68881e-13	4.40763	6	1.45261e-09
2376	8.67899e-13	4.40763	6	1.45096e-09
2378	8.66917e-13	4.40763	6	1.44932e-09
2380	8.65935e-13	4.40763	6	1.44768e-09
2382	8.64953e-13	4.40763	6	1.44604e-09
2384	8.63972e-13	4.40763	6	1.4444e-09
2386	8.6299e-13	4.40763	6	1.44276e-09
2388	8.62008e-13	4.40763	6	1.44112e-09
2390	8.61026e-13	4.40763	6	1.43947e-09
2392	8.60044e-13	4.40763	6	1.43783e-09
2394	8.59063e-13	4.40763	6	1.43619e-09
2396	8.58081e-13	4.40763	6	1.43455e-09
2398	8.57099e-13	4.40763	6	1.43291e-09
2400	8.56117e-13	4.40763	6	1.43127e-09
2402	8.55135e-13	4.40763	6	1.42963e-09
2404	8.54153e-13	4.40763	6	1.42798e-09
2406	8.53172e-13	4.40763	6	1.42634e-09
2408	8.5219e-13	4.40763	6	1.4247e-09
2410	8.51208e-13	4.40763	6	1.42306e-09
2412	8.50226e-13	4.40763	6	1.42142e-09
2414	8.49244e-13	4.40763	6	1.41978e-09
2416	8.48263e-13	4.40763	6	1.41814e-09
2418	8.47281e-13	4.40763	6	1.41649e-09
2420	8.46299e-13	4.40763	6	1.41485e-09
2422	8.45317e-13	4.40763	6	1.41321e-09
2424	8.44335e-13	4.40763	6	1.41157e-09
2426	8.43353e-13	4.40763	6	1.40993e-09
2428	8.42372e-13	4.40763	6	1.40829e-09
2430	8.4139e-13	4.40763	6	1.40665e-09
2432	8.40408e-13	4.40763	6	1.405e-09
2434	8.39426e-13	4.40763	6	1.40336e-09
2436	8.38444e-13	4.40763	6	1.40172e-09
2438	8.37463e-13	4.40763	6	1.40008e-09
2440	8.36481e-13	4.40763	6	1.39844e-09
2442	8.35499e-13	4.40763	6	1.3968e-09
2444	8.34517e-13	4.40763	6	1.39516e-09
2446	8.33535e-13	4.40763	6	1.39351e-09
2448	8.32554e-13	4.40763	6	1.39187e-09
2450	8.31572e-13	4.40763	6	1.39023e-09
2452	8.3059e-13	4.40763	6	1.38859e-09
2454	8.29608e-13	4.40763	6	1.38695e-09
2456	8.28626e-13	4.40763	6	1.38531e-09
2458	8.27644e-13	4.40763	6	1.38367e-09
2460	8.26663e-13	4.40763	6	1.38202e-09
2462	8.25681e-13	4.40763	6	1.38038e-09
2464	8.24699e-13	4.40763	6	1.37874e-09
2466	8.23717e-13	4.40763	6	1.3771e-09
2468	8.22735e-13	4.40763	6	1.37546e-09
2470	8.21754e-13	4.40763	6	1.37382e-09
2472	8.20772e-13	4.40763	6	1.37218e-09
2474	8.1979e-13	4.40763	6	1.37054e-09
2476	8.18808e-13	4.40763	6	1.36889e-09
2478	8.17826e-13	4.40763	6	1.36725e-09
2480	8.16844e-13	4.40763	6	1.36561e-09
2482	8.15863e-13	4.40763	6	1.36397e-09
2484	8.14881e-13	4.40763	6	1.36233e-09
2486	8.13899e-13	4.40763	6	1.36069e-09
2488	8.12917e-13	4.40763	6	1.35905e-09
2490	8.11935e-13	4.40763	6	1.3574e-09
2492	8.10954e-13	4.40763	6	1.35576e-09
2494	8.09972e-13	4.40763	6	1.35412e-09
2496	8.0899e-13	4.40763	6	1.35248e-09
2498	8.08008e-13	4.40763	6	1.35084e-09
2500	8.07026e-13	4.40763	6	1.3492e-09
2502	8.06044e-13	4.40763	6	1.34756e-09
2504	8.05063e-13	4.40763	6	1.34591e-09
2506	8.04081e-13	4.40763	6	1.34427e-09
2508	8.03099e-13	4.40763	6	1.34263e-09
2510	8.02117e-13	4.40763	6	1.34099e-09
2512	8.01135e-13	4.40763	6	1.33935e-09
2514	8.00154e-13	4.40763	6	1.33771e-09
2516	7.99172e-13	4.40763	6	1.33607e-09
2518	7.9819e-13	4.40763	6	1.33442e-09
2520	7.97208e-13	4.40763	6	1.33278e-09
2522	7.96226e-13	4.40763	6	1.33114e-09
2524	7.95245e-13	4.40763	6	1.3295e-09
2526	7.94263e-13	4.40763	6	1.32786e-09
2528	7.93281e-13	4.40763	6	1.32622e-09
2530	7.92299e-13	4.40763	6	1.32458e-09
2532	7.91317e-13	4.40763	6	1.32293e-09
2534	7.90335e-13	4.40763	6	1.32129e-09
2536	7.89354e-13	4.40763	6	1.31965e-09
2538	7.88372e-13	4.40763	6	1.31801e-09
2540	7.8739e-13	4.40763	6	1.31637e-09
2542	7.86408e-13	4.40763	6	1.31473e-09
2544	7.85426e-13	4.40763	6	1.31309e-09
2546	7.84445e-13	4.40763	6	1.31144e-09
2548	7.83463e-13	4.40763	6	1.3098e-09
2550	7.82481e-13	4.40763	6	1.30816e-09
2552	7.81499e-13	4.40763	6	1.30652e-09
2554	7.80517e-13	4.40763	6	1.30488e-09
2556	7.79535e-13	4.40763	6	1.30324e-09
2558	7.78554e-13	4.40763	6	1.3016e-09
2560	7.77572e-13	4.40763	6	1.29995e-09
2562	7.7659e-13	4.40763	6	1.29831e-09
2564	7.75608e-13	4.40763	6	1.29667e-09
2566	7.74626e-13	4.40763	6	1.29503e-09
2568	7.73645e-13	4.40763	6	1.29339e-09
2570	7.72663e-13	4.40763	6	1.29175e-09
2572	7.71681e-13	4.40763	6	1.29011e-09
2574	7.70699e-13	4.40763	6	1.28846e-09
2576	7.69717e-13	4.40763	6	1.28682e-09
2578	7.68735e-13	4.40763	6	1.28518e-09
2580	7.67754e-13	4.40763	6	1.28354e-09
2582	7.66772e-13	4.40763	6	1.2819e-09
2584	7.6579e-13	4.40763	6	1.28026e-09
2586	7.64808e-13	4.40763	6	1.27862e-09
2588	7.63826e-13	4.40763	6	1.27697e-09
2590	7.62845e-13	4.40763	6	1.27533e-09
2592	7.61863e-13	4.40763	6	1.27369e-09
2594	7.60881e-13	4.40763	6	1.27205e-09
2596	7.59899e-13	4.40763	6	1.27041e-09
2598	7.58917e-13	4.40763	6	1.26877e-09
2600	7.57936e-13	4.40763	6	1.26713e-09
2602	7.56954e-13	4.40763	6	1.26548e-09
2604	7.55972e-13	4.40763	6	1.26384e-09
2606	7.5499e-13	4.40763	6	1.2622e-09
2608	7.54008e-13	4.40763	6	1.26056e-09
2610	7.53026e-13	4.40763	6	1.25892e-09
2612	7.52045e-13	4.40763	6	1.25728e-09
2614	7.51063e-13	4.40763	6	1.25564e-09
2616	7.50081e-13	4.40763	6	1.25399e-09
2618	7.49099e-13	4.40763	6	1.25235e-09
2620	7.48117e-13	4.40763	6	1.25071e-09
2622	7.47136e-13	4.40763	6	1.24907e-09
2624	7.46154e-13	4.40763	6	1.24743e-09
2626	7.45172e-13	4.40763	6	1.24579e-09
2628	7.4419e-13	4.40763	6	1.24415e-09
2630	7.43208e-13	4.40763	6	1.2425e-09
2632	7.42226e-13	4.40763	6	1.24086e-09
2634	7.41245e-13	4.40763	6	1.23922e-09
2636	7.40263e-13	4.40763	6	1.23758e-09
2638	7.39281e-13	4.40763	6	1.23594e-09
2640	7.38299e-13	4.40763	6	1.2343e-09
2642	7.37317e-13	4.40763	6	1.23266e-09
2644	7.36336e-13	4.40763	6	1.23102e-09
2646	7.35354e-13	4.40763	6	1.22937e-09
2648	7.34372e-13	4.40763	6	1.22773e-09
2650	7.3339e-13	4.40763	6	1.22609e-09
2652	7.32408e-13	4.40763	6	1.22445e-09
2654	7.31426e-13	4.40763	6	1.22281e-09
2656	7.30445e-13	4.40763	6	1.22117e-09
2658	7.29463e-13	4.40763	6	1.21953e-09
2660	7.28481e-13	4.40763	6	1.21788e-09
2662	7.27499e-13	4.40763	6	1.21624e-09
2664	7.26517e-13	4.40763	6	1.2146e-09
2666	7.25536e-13	4.40763	6	1.21296e-09
2668	7.24554e-13	4.40763	6	1.21132e-09
2670	7.23572e-13	4.40763	6	1.20968e-09
2672	7.2259e-13	4.40763	6	1.20804e-09
2674	7.21608e-13	4.40763	6	1.20639e-09
2676	7.20627e-13	4.40763	6	1.20475e-09
2678	7.19645e-13	4.40763	6	1.20311e-09
2680	7.18663e-13	4.40763	6	1.20147e-09
2682	7.17681e-13	4.40763	6	1.19983e-09
2684	7.16699e-13	4.40763	6	1.19819e-09
2686	7.15717e-13	4.40763	6	1.19655e-09
2688	7.14736e-13	4.40763	6	1.1949e-09
2690	7.13754e-13	4.40763	6	1.19326e-09
2692	7.12772e-13	4.40763	6	1.19162e-09
2694	7.1179e-13	4.40763	6	1.18998e-09
2696	7.10808e-13	4.40763	6	1.18834e-09
2698	7.09827e-13	4.40763	6	1.1867e-09
2700	7.08845e-13	4.40763	6	1.18506e-09
2702	7.07863e-13	4.40763	6	1.18341e-09
2704	7.06881e-13	4.40763	6	1.18177e-09
2706	7.05899e-13	4.40763	6	1.18013e-09
2708	7.04917e-13	4.40763	6	1.17849e-09
2710	7.03936e-13	4.40763	6	1.17685e-09
2712	7.02954e-13	4.40763	6	1.17521e-09
2714	7.01972e-13	4.40763	6	1.17357e-09
2716	7.0099e-13	4.40763	6	1.17192e-09
2718	7.00008e-13	4.40763	6	1.17028e-09
2720	6.99027e-13	4.40763	6	1.16864e-09
2722	6.98045e-13	4.40763	6	1.167e-09
2724	6.97063e-13	4.40763	6	1.16536e-09
2726	6.96081e-13	4.40763	6	1.16372e-09
2728	6.95099e-13	4.40763	6	1.16208e-09
2730	6.94117e-13	4.40763	6	1.16043e-09
2732	6.93136e-13	4.40763	6	1.15879e-09
2734	6.92154e-13	4.40763	6	1.15715e-09
2736	6.91172e-13	4.40763	6	1.15551e-09
2738	6.9019e-13	4.40763	6	1.15387e-09
2740	6.89208e-13	4.40763	6	1.15223e-09
2742	6.88227e-13	4.40763	6	1.15059e-09
2744	6.87245e-13	4.40763	6	1.14894e-09
2746	6.86263e-13	4.40763	6	1.1473e-09
2748	6.85281e-13	4.40763	6	1.14566e-09
2750	6.84299e-13	4.40763	6	1.14402e-09
2752	6.83318e-13	4.40763	6	1.14238e-09
2754	6.82336e-13	4.40763	6	1.14074e-09
2756	6.81354e-13	4.40763	6	1.1391e-09
2758	6.80372e-13	4.40763	6	1.13745e-09
2760	6.7939e-13	4.40763	6	1.13581e-09
2762	6.78408e-13	4.40763	6	1.13417e-09
2764	6.77427e-13	4.40763	6	1.13253e-09
2766	6.76445e-13	4.40763	6	1.13089e-09
2768	6.75463e-13	4.40763	6	1.12925e-09
2770	6.74481e-13	4.40763	6	1.12761e-09
2772	6.73499e-13	4.40763	6	1.12596e-09
2774	6.72518e-13	4.40763	6	1.12432e-09
2776	6.71536e-13	4.40763	6	1.12268e-09
2778	6.70554e-13	4.40763	6	1.12104e-09
2780	6.69572e-13	4.40763	6	1.1194e-09
2782	6.6859e-13	4.40763	6	1.11776e-09
2784	6.67608e-13	4.40763	6	1.11612e-09
2786	6.66627e-13	4.40763	6	1.11447e-09
2788	6.65645e-13	4.40763	6	1.11283e-09
2790	6.64663e-13	4.40763	6	1.11119e-09
2792	6.63681e-13	4.40763	6	1.10955e-09
2794	6.62699e-13	4.40763	6	1.10791e-09
2796	6.61718e-13	4.40763	6	1.10627e-09
2798	6.60736e-13	4.40763	6	1.10463e-09
2800	6.59754e-13	4.40763	6	1.10298e-09
2802	6.58772e-13	4.40763	6	1.10134e-09
2804	6.5779e-13	4.40763	6	1.0997e-09
2806	6.56809e-13	4.40763	6	1.09806e-09
2808	6.55827e-13	4.40763	6	1.09642e-09
2810	6.54845e-13	4.40763	6	1.09478e-09
2812	6.53863e-13	4.40763	6	1.09314e-09
2814	6.52881e-13	4.40763	6	1.0915e-09
2816	6.51899e-13	4.40763	6	1.08985e-09
2818	6.50918e-13	4.40763	6	1.08821e-09
2820	6.49936e-13	4.40763	6	1.08657e-09
2822	6.48954e-13	4.40763	6	1.08493e-09
2824	6.47972e-13	4.40763	6	1.08329e-09
2826	6.4699e-13	4.40763	6	1.08165e-09
2828	6.46009e-13	4.40763	6	1.08001e-09
2830	6.45027e-13	4.40763	6	1.07836e-09
2832	6.44045e-13	4.40763	6	1.07672e-09
2834	6.43063e-13	4.40763	6	1.07508e-09
2836	6.42081e-13	4.40763	6	1.07344e-09
2838	6.41099e-13	4.40763	6	1.0718e-09
2840	6.40118e-13	4.40763	6	1.07016e-09
2842	6.39136e-13	4.40763	6	1.06852e-09
2844	6.38154e-13	4.40763	6	1.06687e-09
2846	6.37172e-13	4.40763	6	1.06523e-09
2848	6.3619e-13	4.40763	6	1.06359e-09
2850	6.35209e-13	4.40763	6	1.06195e-09
2852	6.34227e-13	4.40763	6	1.06031e-09
2854	6.33245e-13	4.40763	6	1.05867e-09
2856	6.32263e-13	4.40763	6	1.05703e-09
2858	6.31281e-13	4.40763	6	1.05538e-09
2860	6.30299e-13	4.40763	6	1.05374e-09
2862	6.29318e-13	4.40763	6	1.0521e-09
2864	6.28336e-13	4.40763	6	1.05046e-09
2866	6.27354e-13	4.40763	6	1.04882e-09
2868	6.26372e-13	4.40763	6	1.04718e-09
2870	6.2539e-13	4.40763	6	1.04554e-09
2872	6.24409e-13	4.40763	6	1.04389e-09
2874	6.23427e-13	4.40763	6	1.04225e-09
2876	6.22445e-13	4.40763	6	1.04061e-09
2878	6.21463e-13	4.40763	6	1.03897e-09
2880	6.20481e-13	4.40763	6	1.03733e-09
2882	6.195e-13	4.40763	6	1.03569e-09
2884	6.18518e-13	4.40763	6	1.03405e-09
2886	6.17536e-13	4.40763	6	1.0324e-09
2888	6.16554e-13	4.40763	6	1.03076e-09
2890	6.15572e-13	4.40763	6	1.02912e-09
2892	6.1459e-13	4.40763	6	1.02748e-09
2894	6.13609e-13	4.40763	6	1.02584e-09
2896	6.12627e-13	4.40763	6	1.0242e-09
2898	6.11645e-13	4.40763	6	1.02256e-09
2900	6.10663e-13	4.40763	6	1.02091e-09
2902	6.09681e-13	4.40763	6	1.01927e-09
2904	6.087e-13	4.40763	6	1.01763e-09
2906	6.07718e-13	4.40763	6	1.01599e-09
2908	6.06736e-13	4.40763	6	1.01435e-09
2910	6.05754e-13	4.40763	6	1.01271e-09
2912	6.04772e-13	4.40763	6	1.01107e-09
2914	6.0379e-13	4.40763	6	1.00942e-09
2916	6.02809e-13	4.40763	6	1.00778e-09
2918	6.01827e-13	4.40763	6	1.00614e-09
2920	6.00845e-13	4.40763	6	1.0045e-09
2922	5.99863e-13	4.40763	6	1.00286e-09
2924	5.98881e-13	4.40763	6	1.00122e-09
2926	5.979e-13	4.40763	6	9.99576e-10
2928	5.96918e-13	4.40763	6	9.97935e-10
2930	5.95936e-13	4.40763	6	9.96293e-10
2932	5.94954e-13	4.40763	6	9.94652e-10
2934	5.93972e-13	4.40763	6	9.9301e-10
2936	5.9299e-13	4.40763	6	9.91369e-10
2938	5.92009e-13	4.40763	6	9.89728e-10
2940	5.91027e-13	4.40763	6	9.88086e-10
2942	5.90045e-13	4.40763	6	9.86445e-10
2944	5.89063e-13	4.40763	6	9.84803e-10
2946	5.88081e-13	4.40763	6	9.83162e-10
2948	5.871e-13	4.40763	6	9.8152e-10
2950	5.86118e-13	4.40763	6	9.79879e-10
2952	5.85136e-13	4.40763	6	9.78238e-10
2954	5.84154e-13	4.40763	6	9.76596e-10
2956	5.83172e-13	4.40763	6	9.74955e-10
2958	5.82191e-13	4.40763	6	9.73313e-10
2960	5.81209e-13	4.40763	6	9.71672e-10
2962	5.80227e-13	4.40763	6	9.70031e-10
2964	5.79245e-13	4.40763	6	9.68389e-10
2966	5.78263e-13	4.40763	6	9.66748e-10
2968	5.77281e-13	4.40763	6	9.65106e-10
2970	5.763e-13	4.40763	6	9.63465e-10
2972	5.75318e-13	4.40763	6	9.61824e-10
2974	5.74336e-13	4.40763	6	9.60182e-10
2976	5.73354e-13	4.40763	6	9.58541e-10
2978	5.72372e-13	4.40763	6	9.56899e-10
2980	5.71391e-13	4.40763	6	9.55258e-10
2982	5.70409e-13	4.40763	6	9.53616e-10
2984	5.69427e-13	4.40763	6	9.51975e-10
2986	5.68445e-13	4.40763	6	9.50334e-10
2988	5.67463e-13	4.40763	6	9.48692e-10
2990	5.66481e-13	4.40763	6	9.47051e-10
2992	5.655e-13	4.40763	6	9.45409e-10
2994	5.64518e-13	4.40763	6	9.43768e-10
2996	5.63536e-13	4.40763	6	9.42127e-10
2998	5.62554e-13	4.40763	6	9.40485e-10
3000	5.61572e-13	4.40763	6	9.38844e-10
3002	5.60591e-13	4.40763	6	9.37202e-10
3004	5.59609e-13	4.40763	6	9.35561e-10
3006	5.58627e-13	4.40763	6	9.3392e-10
3008	5.57645e-13	4.40763	6	9.32278e-10
3010	5.56663e-13	4.40763	6	9.30637e-10
3012	5.55681e-13	4.40763	6	9.28995e-10
3014	5.547e-13	4.40763	6	9.27354e-10
3016	5.53718e-13	4.40763	6	9.25712e-10
3018	5.52736e-13	4.40763	6	9.24071e-10
3020	5.51754e-13	4.40763	6	9.2243e-10
3022	5.50772e-13	4.40763	6	9.20788e-10
3024	5.49791e-13	4.40763	6	9.19147e-10
3026	5.48809e-13	4.40763	6	9.17505e-10
3028	5.47827e-13	4.40763	6	9.15864e-10
3030	5.46845e-13	4.40763	6	9.14223e-10
3032	5.45863e-13	4.40763	6	9.12581e-10
3034	5.44882e-13	4.40763	6	9.1094e-10
3036	5.439e-13	4.40763	6	9.09298e-10
3038	5.42918e-13	4.40763	6	9.07657e-10
3040	5.41936e-13	4.40763	6	9.06016e-10
3042	5.40954e-13	4.40763	6	9.04374e-10
3044	5.39972e-13	4.40763	6	9.02733e-10
3046	5.38991e-13	4.40763	6	9.01091e-10
3048	5.38009e-13	4.40763	6	8.9945e-10
3050	5.37027e-13	4.40763	6	8.97808e-10
3052	5.36045e-13	4.40763	6	8.96167e-10
3054	5.35063e-13	4.40763	6	8.94526e-10
3056	5.34082e-13	4.40763	6	8.92884e-10
3058	5.331e-13	4.40763	6	8.91243e-10
3060	5.32118e-13	4.40763	6	8.89601e-10
3062	5.31136e-13	4.40763	6	8.8796e-10
3064	5.30154e-13	4.40763	6	8.86319e-10
3066	5.29172e-13	4.40763	6	8.84677e-10
3068	5.28191e-13	4.40763	6	8.83036e-10
3070	5.27209e-13	4.40763	6	8.81394e-10
3072	5.26227e-13	4.40763	6	8.79753e-10
3074	5.25245e-13	4.40763	6	8.78112e-10
3076	5.24263e-13	4.40763	6	8.7647e-10
3078	5.23282e-13	4.40763	6	8.74829e-10
3080	5.223e-13	4.40763	6	8.73187e-10
3082	5.21318e-13	4.40763	6	8.71546e-10
3084	5.20336e-13	4.40763	6	8.69904e-10
3086	5.19354e-13	4.40763	6	8.68263e-10
3088	5.18372e-13	4.40763	6	8.66622e-10
3090	5.17391e-13	4.40763	6	8.6498e-10
3092	5.16409e-13	4.40763	6	8.63339e-10
3094	5.15427e-13	4.40763	6	8.61697e-10
3096	5.14445e-13	4.40763	6	8.60056e-10
3098	5.13463e-13	4.40763	6	8.58415e-10
3100	5.12482e-13	4.40763	6	8.56773e-10
3102	5.115e-13	4.40763	6	8.55132e-10
3104	5.10518e-13	4.40763	6	8.5349e-10
3106	5.09536e-13	4.40763	6	8.51849e-10
3108	5.08554e-13	4.40763	6	8.50208e-10
3110	5.07573e-13	4.40763	6	8.48566e-10
3112	5.06591e-13	4.40763	6	8.46925e-10
3114	5.05609e-13	4.40763	6	8.45283e-10
3116	5.04627e-13	4.40763	6	8.43642e-10
3118	5.03645e-13	4.40763	6	8.42e-10
3120	5.02663e-13	4.40763	6	8.40359e-10
3122	5.01682e-13	4.40763	6	8.38718e-10
3124	5.007e-13	4.40763	6	8.37076e-10
3126	4.99718e-13	4.40763	6	8.35435e-10
3128	4.98736e-13	4.40763	6	8.33793e-10
3130	4.97754e-13	4.40763	6	8.32152e-10
3132	4.96773e-13	4.40763	6	8.30511e-10
3134	4.95791e-13	4.40763	6	8.28869e-10
3136	4.94809e-13	4.40763	6	8.27228e-10
3138	4.93827e-13	4.40763	6	8.25586e-10
3140	4.92845e-13	4.40763	6	8.23945e-10
3142	4.91863e-13	4.40763	6	8.22304e-10
3144	4.90882e-13	4.40763	6	8.20662e-10
3146	4.899e-13	4.40763	6	8.19021e-10
3148	4.88918e-13	4.40763	6	8.17379e-10
3150	4.87936e-13	4.40763	6	8.15738e-10
3152	4.86954e-13	4.40763	6	8.14096e-10
3154	4.85973e-13	4.40763	6	8.12455e-10
3156	4.84991e-13	4.40763	6	8.10814e-10
3158	4.84009e-13	4.40763	6	8.09172e-10
3160	4.83027e-13	4.40763	6	8.07531e-10
3162	4.82045e-13	4.40763	6	8.05889e-10
3164	4.81063e-13	4.40763	6	8.04248e-10
3166	4.80082e-13	4.40763	6	8.02607e-10
3168	4.791e-13	4.40763	6	8.00965e-10
3170	4.78118e-13	4.40763	6	7.99324e-10
3172	4.77136e-13	4.40763	6	7.97682e-10
3174	4.76154e-13	4.40763	6	7.96041e-10
3176	4.75173e-13	4.40763	6	7.944e-10
3178	4.74191e-13	4.40763	6	7.92758e-10
3180	4.73209e-13	4.40763	6	7.91117e-10
3182	4.72227e-13	4.40763	6	7.89475e-10
3184	4.71245e-13	4.40763	6	7.87834e-10
3186	4.70264e-13	4.40763	6	7.86192e-10
3188	4.69282e-13	4.40763	6	7.84551e-10
3190	4.683e-13	4.40763	6	7.8291e-10
3192	4.67318e-13	4.40763	6	7.81268e-10
3194	4.66336e-13	4.40763	6	7.79627e-10
3196	4.65354e-13	4.40763	6	7.77985e-10
3198	4.64373e-13	4.40763	6	7.76344e-10
3200	4.63391e-13	4.40763	6	7.74703e-10
3202	4.62409e-13	4.40763	6	7.73061e-10
3204	4.61427e-13	4.40763	6	7.7142e-10
3206	4.60445e-13	4.40763	6	7.69778e-10
3208	4.59464e-13	4.40763	6	7.68137e-10
3210	4.58482e-13	4.40763	6	7.66496e-10
3212	4.575e-13	4.40763	6	7.64854e-10
3214	4.56518e-13	4.40763	6	7.63213e-10
3216	4.55536e-13	4.40763	6	7.61571e-10
3218	4.54554e-13	4.40763	6	7.5993e-10
3220	4.53573e-13	4.40763	6	7.58288e-10
3222	4.52591e-13	4.40763	6	7.56647e-10
3224	4.51609e-13	4.40763	6	7.55006e-10
3226	4.50627e-13	4.40763	6	7.53364e-10
3228	4.49645e-13	4.40763	6	7.51723e-10
3230	4.48664e-13	4.40763	6	7.50081e-10
3232	4.47682e-13	4.40763	6	7.4844e-10
3234	4.467e-13	4.40763	6	7.46799e-10
3236	4.45718e-13	4.40763	6	7.45157e-10
3238	4.44736e-13	4.40763	6	7.43516e-10
3240	4.43754e-13	4.40763	6	7.41874e-10
3242	4.42773e-13	4.40763	6	7.40233e-10
3244	4.41791e-13	4.40763	6	7.38592e-10
3246	4.40809e-13	4.40763	6	7.3695e-10
3248	4.39827e-13	4.40763	6	7.35309e-10
3250	4.38845e-13	4.40763	6	7.33667e-10
3252	4.37864e-13	4.40763	6	7.32026e-10
3254	4.36882e-13	4.40763	6	7.30384e-10
3256	4.359e-13	4.40763	6	7.28743e-10
3258	4.34918e-13	4.40763	6	7.27102e-10
3260	4.33936e-13	4.40763	6	7.2546e-10
3262	4.32955e-13	4.40763	6	7.23819e-10
3264	4.31973e-13	4.40763	6	7.22177e-10
3266	4.30991e-13	4.40763	6	7.20536e-10
3268	4.30009e-13	4.40763	6	7.18895e-10
3270	4.29027e-13	4.40763	6	7.17253e-10
3272	4.28045e-13	4.40763	6	7.15612e-10
3274	4.27064e-13	4.40763	6	7.1397e-10
3276	4.26082e-13	4.40763	6	7.12329e-10
3278	4.251e-13	4.40763	6	7.10688e-10
3280	4.24118e-13	4.40763	6	7.09046e-10
3282	4.23136e-13	4.40763	6	7.07405e-10
3284	4.22155e-13	4.40763	6	7.05763e-10
3286	4.21173e-13	4.40763	6	7.04122e-10
3288	4.20191e-13	4.40763	6	7.0248e-10
3290	4.19209e-13	4.40763	6	7.00839e-10
3292	4.18227e-13	4.40763	6	6.99198e-10
3294	4.17245e-13	4.40763	6	6.97556e-10
3296	4.16264e-13	4.40763	6	6.95915e-10
3298	4.15282e-13	4.40763	6	6.94273e-10
3300	4.143e-13	4.40763	6	6.92632e-10
3302	4.13318e-13	4.40763	6	6.90991e-10
3304	4.12336e-13	4.40763	6	6.89349e-10
3306	4.11355e-13	4.40763	6	6.87708e-10
3308	4.10373e-13	4.40763	6	6.86066e-10
3310	4.09391e-13	4.40763	6	6.84425e-10
3312	4.08409e-13	4.40763	6	6.82784e-10
3314	4.07427e-13	4.40763	6	6.81142e-10
3316	4.06445e-13	4.40763	6	6.79501e-10
3318	4.05464e-13	4.40763	6	6.77859e-10
3320	4.04482e-13	4.40763	6	6.76218e-10
3322	4.035e-13	4.40763	6	6.74576e-10
3324	4.02518e-13	4.40763	6	6.72935e-10
3326	4.01536e-13	4.40763	6	6.71294e-10
3328	4.00555e-13	4.40763	6	6.69652e-10
3330	3.99573e-13	4.40763	6	6.68011e-10
3332	3.98591e-13	4.40763	6	6.66369e-10
3334	3.97609e-13	4.40763	6	6.64728e-10
3336	3.96627e-13	4.40763	6	6.63087e-10
3338	3.95646e-13	4.40763	6	6.61445e-10
3340	3.94664e-13	4.40763	6	6.59804e-10
3342	3.93682e-13	4.40763	6	6.58162e-10
3344	3.927e-13	4.40763	6	6.56521e-10
3346	3.91718e-13	4.40763	6	6.5488e-10
3348	3.90736e-13	4.40763	6	6.53238e-10
3350	3.89755e-13	4.40763	6	6.51597e-10
3352	3.88773e-13	4.40763	6	6.49955e-10
3354	3.87791e-13	4.40763	6	6.48314e-10
3356	3.86809e-13	4.40763	6	6.46672e-10
3358	3.85827e-13	4.40763	6	6.45031e-10
3360	3.84846e-13	4.40763	6	6.4339e-10
3362	3.83864e-13	4.40763	6	6.41748e-10
3364	3.82882e-13	4.40763	6	6.40107e-10
3366	3.819e-13	4.40763	6	6.38465e-10
3368	3.80918e-13	4.40763	6	6.36824e-10
3370	3.79936e-13	4.40763	6	6.35183e-10
3372	3.78955e-13	4.40763	6	6.33541e-10
3374	3.77973e-13	4.40763	6	6.319e-10
3376	3.76991e-13	4.40763	6	6.30258e-10
3378	3.76009e-13	4.40763	6	6.28617e-10
3380	3.75027e-13	4.40763	6	6.26976e-10
3382	3.74046e-13	4.40763	6	6.25334e-10
3384	3.73064e-13	4.40763	6	6.23693e-10
3386	3.72082e-13	4.40763	6	6.22051e-10
3388	3.711e-13	4.40763	6	6.2041e-10
3390	3.70118e-13	4.40763	6	6.18768e-10
3392	3.69137e-13	4.40763	6	6.17127e-10
3394	3.68155e-13	4.40763	6	6.15486e-10
3396	3.67173e-13	4.40763	6	6.13844e-10
3398	3.66191e-13	4.40763	6	6.12203e-10
3400	3.65209e-13	4.40763	6	6.10561e-10
3402	3.64227e-13	4.40763	6	6.0892e-10
3404	3.63246e-13	4.40763	6	6.07279e-10
3406	3.62264e-13	4.40763	6	6.05637e-10
3408	3.61282e-13	4.40763	6	6.03996e-10
3410	3.603e-13	4.40763	6	6.02354e-10
3412	3.59318e-13	4.40763	6	6.00713e-10
3414	3.58337e-13	4.40763	6	5.99072e-10
3416	3.57355e-13	4.40763	6	5.9743e-10
3418	3.56373e-13	4.40763	6	5.95789e-10
3420	3.55391e-13	4.40763	6	5.94147e-10
3422	3.54409e-13	4.40763	6	5.92506e-10
3424	3.53427e-13	4.40763	6	5.90864e-10
3426	3.52446e-13	4.40763	6	5.89223e-10
3428	3.51464e-13	4.40763	6	5.87582e-10
3430	3.50482e-13	4.40763	6	5.8594e-10
3432	3.495e-13	4.40763	6	5.84299e-10
3434	3.48518e-13	4.40763	6	5.82657e-10
3436	3.47537e-13	4.40763	6	5.81016e-10
3438	3.46555e-13	4.40763	6	5.79375e-10
3440	3.45573e-13	4.40763	6	5.77733e-10
3442	3.44591e-13	4.40763	6	5.76092e-10
3444	3.43609e-13	4.40763	6	5.7445e-10
3446	3.42627e-13	4.40763	6	5.72809e-10
3448	3.41646e-13	4.40763	6	5.71168e-10
3450	3.40664e-13	4.40763	6	5.69526e-10
3452	3.39682e-13	4.40763	6	5.67885e-10
3454	3.387e-13	4.40763	6	5.66243e-10
3456	3.37718e-13	4.40763	6	5.64602e-10
3458	3.36737e-13	4.40763	6	5.6296e-10
3460	3.35755e-13	4.40763	6	5.61319e-10
3462	3.34773e-13	4.40763	6	5.59678e-10
3464	3.33791e-13	4.40763	6	5.58036e-10
3466	3.32809e-13	4.40763	6	5.56395e-10
3468	3.31828e-13	4.40763	6	5.54753e-10
3470	3.30846e-13	4.40763	6	5.53112e-10
3472	3.29864e-13	4.40763	6	5.51471e-10
3474	3.28882e-13	4.40763	6	5.49829e-10
3476	3.279e-13	4.40763	6	5.48188e-10
3478	3.26918e-13	4.40763	6	5.46546e-10
3480	3.25937e-13	4.40763	6	5.44905e-10
3482	3.24955e-13	4.40763	6	5.43264e-10
3484	3.23973e-13	4.40763	6	5.41622e-10
3486	3.22991e-13	4.40763	6	5.39981e-10
3488	3.22009e-13	4.40763	6	5.38339e-10
3490	3.21028e-13	4.40763	6	5.36698e-10
3492	3.20046e-13	4.40763	6	5.35056e-10
3494	3.19064e-13	4.40763	6	5.33415e-10
3496	3.18082e-13	4.40763	6	5.31774e-10
3498	3.171e-13	4.40763	6	5.30132e-10
3500	3.16118e-13	4.40763	6	5.28491e-10
3502	3.15137e-13	4.40763	6	5.26849e-10
3504	3.14155e-13	4.40763	6	5.25208e-10
3506	3.13173e-13	4.40763	6	5.23567e-10
3508	3.12191e-13	4.40763	6	5.21925e-10
3510	3.11209e-13	4.40763	6	5.20284e-10
3512	3.10228e-13	4.40763	6	5.18642e-10
3514	3.09246e-13	4.40763	6	5.17001e-10
3516	3.08264e-13	4.40763	6	5.1536e-10
3518	3.07282e-13	4.40763	6	5.13718e-10
3520	3.063e-13	4.40763	6	5.12077e-10
3522	3.05318e-13	4.40763	6	5.10435e-10
3524	3.04337e-13	4.40763	6	5.08794e-10
3526	3.03355e-13	4.40763	6	5.07152e-10
3528	3.02373e-13	4.40763	6	5.05511e-10
3530	3.01391e-13	4.40763	6	5.0387e-10
3532	3.00409e-13	4.40763	6	5.02228e-10
3534	2.99428e-13	4.40763	6	5.00587e-10
3536	2.98446e-13	4.40763	6	4.98945e-10
3538	2.97464e-13	4.40763	6	4.97304e-10
3540	2.96482e-13	4.40763	6	4.95663e-10
3542	2.955e-13	4.40763	6	4.94021e-10
3544	2.94519e-13	4.40763	6	4.9238e-10
3546	2.93537e-13	4.40763	6	4.90738e-10
3548	2.92555e-13	4.40763	6	4.89097e-10
3550	2.91573e-13	4.40763	6	4.87456e-10
3552	2.90591e-13	4.40763	6	4.85814e-10
3554	2.89609e-13	4.40763	6	4.84173e-10
3556	2.88628e-13	4.40763	6	4.82531e-10
3558	2.87646e-13	4.40763	6	4.8089e-10
3560	2.86664e-13	4.40763	6	4.79248e-10
3562	2.85682e-13	4.40763	6	4.77607e-10
3564	2.847e-13	4.40763	6	4.75966e-10
3566	2.83719e-13	4.40763	6	4.74324e-10
3568	2.82737e-13	4.40763	6	4.72683e-10
3570	2.81755e-13	4.40763	6	4.71041e-10
3572	2.80773e-13	4.40763	6	4.694e-10
3574	2.79791e-13	4.40763	6	4.67759e-10
3576	2.78809e-13	4.40763	6	4.66117e-10
3578	2.77828e-13	4.40763	6	4.64476e-10
3580	2.76846e-13	4.40763	6	4.62834e-10
3582	2.75864e-13	4.40763	6	4.61193e-10
3584	2.74882e-13	4.40763	6	4.59552e-10
3586	2.739e-13	4.40763	6	4.5791e-10
3588	2.72919e-13	4.40763	6	4.56269e-10
3590	2.71937e-13	4.40763	6	4.54627e-10
3592	2.70955e-13	4.40763	6	4.52986e-10
3594	2.69973e-13	4.40763	6	4.51344e-10
3596	2.68991e-13	4.40763	6	4.49703e-10
3598	2.68009e-13	4.40763	6	4.48062e-10
3600	2.67028e-13	4.40763	6	4.4642e-10
3602	2.66046e-13	4.40763	6	4.44779e-10
3604	2.65064e-13	4.40763	6	4.43137e-10
3606	2.64082e-13	4.40763	6	4.41496e-10
3608	2.631e-13	4.40763	6	4.39855e-10
3610	2.62119e-13	4.40763	6	4.38213e-10
3612	2.61137e-13	4.40763	6	4.36572e-10
3614	2.60155e-13	4.40763	6	4.3493e-10
3616	2.59173e-13	4.40763	6	4.33289e-10
3618	2.58191e-13	4.40763	6	4.31648e-10
3620	2.5721e-13	4.40763	6	4.30006e-10
3622	2.56228e-13	4.40763	6	4.28365e-10
3624	2.55246e-13	4.40763	6	4.26723e-10
3626	2.54264e-13	4.40763	6	4.25082e-10
3628	2.53282e-13	4.40763	6	4.2344e-10
3630	2.523e-13	4.40763	6	4.21799e-10
3632	2.51319e-13	4.40763	6	4.20158e-10
3634	2.50337e-13	4.40763	6	4.18516e-10
3636	2.49355e-13	4.40763	6	4.16875e-10
3638	2.48373e-13	4.40763	6	4.15233e-10
3640	2.47391e-13	4.40763	6	4.13592e-10
3642	2.4641e-13	4.40763	6	4.11951e-10
3644	2.45428e-13	4.40763	6	4.10309e-10
3646	2.44446e-13	4.40763	6	4.08668e-10
3648	2.43464e-13	4.40763	6	4.07026e-10
3650	2.42482e-13	4.40763	6	4.05385e-10
3652	2.415e-13	4.40763	6	4.03744e-10
3654	2.40519e-13	4.40763	6	4.02102e-10
3656	2.39537e-13	4.40763	6	4.00461e-10
3658	2.38555e-13	4.40763	6	3.98819e-10
3660	2.37573e-13	4.40763	6	3.97178e-10
3662	2.36591e-13	4.40763	6	3.95536e-10
3664	2.3561e-13	4.40763	6	3.93895e-10
3666	2.34628e-13	4.40763	6	3.92254e-10
3668	2.33646e-13	4.40763	6	3.90612e-10
3670	2.32664e-13	4.40763	6	3.88971e-10
3672	2.31682e-13	4.40763	6	3.87329e-10
3674	2.307e-13	4.40763	6	3.85688e-10
3676	2.29719e-13	4.40763	6	3.84047e-10
3678	2.28737e-13	4.40763	6	3.82405e-10
3680	2.27755e-13	4.40763	6	3.80764e-10
3682	2.26773e-13	4.40763	6	3.79122e-10
3684	2.25791e-13	4.40763	6	3.77481e-10
3686	2.2481e-13	4.40763	6	3.7584e-10
3688	2.23828e-13	4.40763	6	3.74198e-10
3690	2.22846e-13	4.40763	6	3.72557e-10
3692	2.21864e-13	4.40763	6	3.70915e-10
3694	2.20882e-13	4.40763	6	3.69274e-10
3696	2.19901e-13	4.40763	6	3.67632e-10
3698	2.18919e-13	4.40763	6	3.65991e-10
3700	2.17937e-13	4.40763	6	3.6435e-10
3702	2.16955e-13	4.40763	6	3.62708e-10
3704	2.15973e-13	4.40763	6	3.61067e-10
3706	2.14991e-13	4.40763	6	3.59425e-10
3708	2.1401e-13	4.40763	6	3.57784e-10
3710	2.13028e-13	4.40763	6	3.56143e-10
3712	2.12046e-13	4.40763	6	3.54501e-10
3714	2.11064e-13	4.40763	6	3.5286e-10
3716	2.10082e-13	4.40763	6	3.51218e-10
3718	2.09101e-13	4.40763	6	3.49577e-10
3720	2.08119e-13	4.40763	6	3.47936e-10
3722	2.07137e-13	4.40763	6	3.46294e-10
3724	2.06155e-13	4.40763	6	3.44653e-10
3726	2.05173e-13	4.40763	6	3.43011e-10
3728	2.04191e-13	4.40763	6	3.4137e-10
3730	2.0321e-13	4.40763	6	3.39728e-10
3732	2.02228e-13	4.40763	6	3.38087e-10
3734	2.01246e-13	4.40763	6	3.36446e-10
3736	2.00264e-13	4.40763	6	3.34804e-10
3738	1.99282e-13	4.40763	6	3.33163e-10
3740	1.98301e-13	4.40763	6	3.31521e-10
3742	1.97319e-13	4.40763	6	3.2988e-10
3744	1.96337e-13	4.40763	6	3.28239e-10
3746	1.95355e-13	4.40763	6	3.26597e-10
3748	1.94373e-13	4.40763	6	3.24956e-10
3750	1.93391e-13	4.40763	6	3.23314e-10
3752	1.9241e-13	4.40763	6	3.21673e-10
3754	1.91428e-13	4.40763	6	3.20032e-10
3756	1.90446e-13	4.40763	6	3.1839e-10
3758	1.89464e-13	4.40763	6	3.16749e-10
3760	1.88482e-13	4.40763	6	3.15107e-10
3762	1.87501e-13	4.40763	6	3.13466e-10
3764	1.86519e-13	4.40763	6	3.11824e-10
3766	1.85537e-13	4.40763	6	3.10183e-10
3768	1.84555e-13	4.40763	6	3.08542e-10
3770	1.83573e-13	4.40763	6	3.069e-10
3772	1.82592e-13	4.40763	6	3.05259e-10
3774	1.8161e-13	4.40763	6	3.03617e-10
3776	1.80628e-13	4.40763	6	3.01976e-10
3778	1.79646e-13	4.40763	6	3.00335e-10
3780	1.78664e-13	4.40763	6	2.98693e-10
3782	1.77682e-13	4.40763	6	2.97052e-10
3784	1.76701e-13	4.40763	6	2.9541e-10
3786	1.75719e-13	4.40763	6	2.93769e-10
3788	1.74737e-13	4.40763	6	2.92128e-10
3790	1.73755e-13	4.40763	6	2.90486e-10
3792	1.72773e-13	4.40763	6	2.88845e-10
3794	1.71792e-13	4.40763	6	2.87203e-10
3796	1.7081e-13	4.40763	6	2.85562e-10
3798	1.69828e-13	4.40763	6	2.8392e-10
3800	1.68846e-13	4.40763	6	2.82279e-10
3802	1.67864e-13	4.40763	6	2.80638e-10
3804	1.66882e-13	4.40763	6	2.78996e-10
3806	1.65901e-13	4.40763	6	2.77355e-10
3808	1.64919e-13	4.40763	6	2.75713e-10
3810	1.63937e-13	4.40763	6	2.74072e-10
3812	1.62955e-13	4.40763	6	2.72431e-10
3814	1.61973e-13	4.40763	6	2.70789e-10
3816	1.60992e-13	4.40763	6	2.69148e-10
3818	1.6001e-13	4.40763	6	2.67506e-10
3820	1.59028e-13	4.40763	6	2.65865e-10
3822	1.58046e-13	4.40763	6	2.64224e-10
3824	1.57064e-13	4.40763	6	2.62582e-10
3826	1.56082e-13	4.40763	6	2.60941e-10
3828	1.55101e-13	4.40763	6	2.59299e-10
3830	1.54119e-13	4.40763	6	2.57658e-10
3832	1.53137e-13	4.40763	6	2.56016e-10
3834	1.52155e-13	4.40763	6	2.54375e-10
3836	1.51173e-13	4.40763	6	2.52734e-10
3838	1.50192e-13	4.40763	6	2.51092e-10
3840	1.4921e-13	4.40763	6	2.49451e-10
3842	1.48228e-13	4.40763	6	2.47809e-10
3844	1.47246e-13	4.40763	6	2.46168e-10
3846	1.46264e-13	4.40763	6	2.44527e-10
3848	1.45283e-13	4.40763	6	2.42885e-10
3850	1.44301e-13	4.40763	6	2.41244e-10
3852	1.43319e-13	4.40763	6	2.39602e-10
3854	1.42337e-13	4.40763	6	2.37961e-10
3856	1.41355e-13	4.40763	6	2.3632e-10
3858	1.40373e-13	4.40763	6	2.34678e-10
3860	1.39392e-13	4.40763	6	2.33037e-10
3862	1.3841e-13	4.40763	6	2.31395e-10
3864	1.37428e-13	4.40763	6	2.29754e-10
3866	1.36446e-13	4.40763	6	2.28112e-10
3868	1.35464e-13	4.40763	6	2.26471e-10
3870	1.34483e-13	4.40763	6	2.2483e-10
3872	1.33501e-13	4.40763	6	2.23188e-10
3874	1.32519e-13	4.40763	6	2.21547e-10
3876	1.31537e-13	4.40763	6	2.19905e-10
3878	1.30555e-13	4.40763	6	2.18264e-10
3880	1.29573e-13	4.40763	6	2.16623e-10
3882	1.28592e-13	4.40763	6	2.14981e-10
3884	1.2761e-13	4.40763	6	2.1334e-10
3886	1.26628e-13	4.40763	6	2.11698e-10
3888	1.25646e-13	4.40763	6	2.10057e-10
3890	1.24664e-13	4.40763	6	2.08416e-10
3892	1.23683e-13	4.40763	6	2.06774e-10
3894	1.22701e-13	4.40763	6	2.05133e-10
3896	1.21719e-13	4.40763	6	2.03491e-10
3898	1.20737e-13	4.40763	6	2.0185e-10
3900	1.19755e-13	4.40763	6	2.00208e-10
3902	1.18774e-13	4.40763	6	1.98567e-10
3904	1.17792e-13	4.40763	6	1.96926e-10
3906	1.1681e-13	4.40763	6	1.95284e-10
3908	1.15828e-13	4.40763	6	1.93643e-10
3910	1.14846e-13	4.40763	6	1.92001e-10
3912	1.13864e-13	4.40763	6	1.9036e-10
3914	1.12883e-13	4.40763	6	1.88719e-10
3916	1.11901e-13	4.40763	6	1.87077e-10
3918	1.10919e-13	4.40763	6	1.85436e-10
3920	1.09937e-13	4.40763	6	1.83794e-10
3922	1.08955e-13	4.40763	6	1.82153e-10
3924	1.07974e-13	4.40763	6	1.80512e-10
3926	1.06992e-13	4.40763	6	1.7887e-10
3928	1.0601e-13	4.40763	6	1.77229e-10
3930	1.05028e-13	4.40763	6	1.75587e-10
3932	1.04046e-13	4.40763	6	1.73946e-10
3934	1.03064e-13	4.40763	6	1.72304e-10
3936	1.02083e-13	4.40763	6	1.70663e-10
3938	1.01101e-13	4.40763	6	1.69022e-10
3940	1.00119e-13	4.40763	6	1.6738e-10
3942	9.91372e-14	4.40763	6	1.65739e-10
3944	9.81554e-14	4.40763	6	1.64097e-10
3946	9.71736e-14	4.40763	6	1.62456e-10
3948	9.61917e-14	4.40763	6	1.60815e-10
3950	9.52099e-14	4.40763	6	1.59173e-10
3952	9.42281e-14	4.40763	6	1.57532e-10
3954	9.32463e-14	4.40763	6	1.5589e-10
3956	9.22645e-14	4.40763	6	1.54249e-10
3958	9.12827e-14	4.40763	6	1.52608e-10
3960	9.03008e-14	4.40763	6	1.50966e-10
3962	8.9319e-14	4.40763	6	1.49325e-10
3964	8.83372e-14	4.40763	6	1.47683e-10
3966	8.73554e-14	4.40763	6	1.46042e-10
3968	8.63736e-14	4.40763	6	1.444e-10
3970	8.53918e-14	4.40763	6	1.42759e-10
3972	8.441e-14	4.40763	6	1.41118e-10
3974	8.34281e-14	4.40763	6	1.39476e-10
3976	8.24463e-14	4.40763	6	1.37835e-10
3978	8.14645e-14	4.40763	6	1.36193e-10
3980	8.04827e-14	4.40763	6	1.34552e-10
3982	7.95009e-14	4.40763	6	1.32911e-10
3984	7.85191e-14	4.40763	6	1.31269e-10
3986	7.75372e-14	4.40763	6	1.29628e-10
3988	7.65554e-14	4.40763	6	1.27986e-10
3990	7.55736e-14	4.40763	6	1.26345e-10
3992	7.45918e-14	4.40763	6	1.24704e-10
3994	7.361e-14	4.40763	6	1.23062e-10
3996	7.26282e-14	4.40763	6	1.21421e-10
[truncated: 2 more rows]

## Sheet: varycA4_60-1Csx1-1Crn1-1Acr
Time	cA4	cleavedRNA	A2>P	cA4_Csx1 + cA4_Csx1_RNA
0	60	0	0	0
2	13.259	0.835782	43.7632	0.999953
4	0.00196356	1.6184	59.1425	0.804393
6	0.000807199	2.19682	59.3782	0.602361
8	0.000521153	2.64761	59.5031	0.484437
10	0.000380272	3.01623	59.5891	0.401839
12	0.000294259	3.32484	59.6538	0.339246
14	0.000235785	3.58693	59.7047	0.289725
16	0.000193326	3.81171	59.746	0.249465
18	0.000161121	4.00586	59.7801	0.216116
20	0.000135933	4.17445	59.8087	0.188113
22	0.000115717	4.32149	59.8329	0.164355
24	9.9226e-05	4.45015	59.8536	0.144035
26	8.564e-05	4.56304	59.8714	0.126544
28	7.42139e-05	4.66233	59.8868	0.111409
30	6.46096e-05	4.74982	59.9002	0.0982561
32	5.64102e-05	4.82704	59.9119	0.0867855
34	4.9411e-05	4.89529	59.9221	0.0767516
36	4.33659e-05	4.95568	59.931	0.067952
38	3.81518e-05	5.00918	59.9389	0.0602181
40	3.36197e-05	5.0566	59.9458	0.0534081
42	2.96607e-05	5.09868	59.9519	0.0474021
44	2.62227e-05	5.13603	59.9573	0.0420975
46	2.31962e-05	5.16922	59.962	0.0374069
48	2.05325e-05	5.19871	59.9663	0.0332548
50	1.82149e-05	5.22494	59.97	0.029576
52	1.61524e-05	5.24826	59.9733	0.0263138
54	1.43255e-05	5.26902	59.9762	0.0234191
56	1.27392e-05	5.2875	59.9789	0.0208488
58	1.1322e-05	5.30395	59.9812	0.0185654
60	1.00486e-05	5.3186	59.9832	0.0165357
62	8.94543e-06	5.33166	59.9851	0.0147309
64	7.96998e-06	5.34328	59.9867	0.0131254
66	7.08766e-06	5.35364	59.9881	0.0116967
68	6.29765e-06	5.36288	59.9894	0.010425
70	5.61651e-06	5.37111	59.9906	0.00929265
72	5.01104e-06	5.37845	59.9916	0.00828425
74	4.46132e-06	5.38499	59.9925	0.00738601
76	3.9639e-06	5.39082	59.9933	0.00658571
78	3.53476e-06	5.39602	59.994	0.00587259
80	3.15816e-06	5.40066	59.9947	0.00523707
82	2.81839e-06	5.40479	59.9953	0.00467062
84	2.50834e-06	5.40848	59.9958	0.00416566
86	2.22915e-06	5.41177	59.9962	0.00371545
88	1.98926e-06	5.4147	59.9966	0.00331405
90	1.77877e-06	5.41732	59.997	0.00295616
92	1.58949e-06	5.41966	59.9973	0.00263703
94	1.4169e-06	5.42174	59.9976	0.00235241
96	1.25921e-06	5.4236	59.9979	0.00209855
98	1.12026e-06	5.42525	59.9981	0.00187212
100	1.00066e-06	5.42673	59.9983	0.00167018
102	8.95364e-07	5.42805	59.9985	0.00149007
104	8.00833e-07	5.42923	59.9987	0.00132943
106	7.14837e-07	5.43028	59.9988	0.00118612
108	6.36171e-07	5.43121	59.9989	0.00105825
110	5.64732e-07	5.43205	59.999	0.000944168
112	5.02898e-07	5.4328	59.9991	0.000842392
114	4.49319e-07	5.43346	59.9992	0.000751614
116	4.02169e-07	5.43405	59.9993	0.000670646
118	3.60061e-07	5.43458	59.9994	0.000598421
120	3.21992e-07	5.43506	59.9995	0.000533984
122	2.8728e-07	5.43548	59.9995	0.000476483
124	2.55512e-07	5.43585	59.9996	0.000425161
126	2.26632e-07	5.43619	59.9996	0.00037935
128	2.01515e-07	5.43649	59.9997	0.000338473
130	1.79742e-07	5.43676	59.9997	0.000302013
132	1.60708e-07	5.43699	59.9997	0.0002695
134	1.4391e-07	5.43721	59.9998	0.000240505
136	1.28939e-07	5.4374	59.9998	0.000214646
138	1.15471e-07	5.43757	59.9998	0.000191576
140	1.03252e-07	5.43772	59.9998	0.000170987
142	9.20992e-08	5.43785	59.9998	0.000152605
144	8.18803e-08	5.43797	59.9999	0.000136187
146	7.25504e-08	5.43808	59.9999	0.000121518
148	6.43586e-08	5.43818	59.9999	0.000108419
150	5.72265e-08	5.43826	59.9999	9.67326e-05
152	5.1004e-08	5.43834	59.9999	8.6314e-05
154	4.5558e-08	5.43841	59.9999	7.70299e-05
156	4.07713e-08	5.43847	59.9999	6.87586e-05
158	3.6542e-08	5.43852	59.9999	6.13895e-05
160	3.27817e-08	5.43857	59.9999	5.48223e-05
162	2.94154e-08	5.43861	60	4.89667e-05
164	2.638e-08	5.43865	60	4.37415e-05
166	2.36234e-08	5.43868	60	3.90743e-05
168	2.11035e-08	5.43871	60	3.49008e-05
170	1.87872e-08	5.43874	60	3.11642e-05
172	1.66496e-08	5.43877	60	2.78147e-05
174	1.4722e-08	5.43879	60	2.48121e-05
176	1.30248e-08	5.43881	60	2.21258e-05
178	1.15341e-08	5.43883	60	1.97269e-05
180	1.02272e-08	5.43884	60	1.75883e-05
182	9.08353e-09	5.43886	60	1.56847e-05
184	8.08382e-09	5.43887	60	1.39928e-05
186	7.21047e-09	5.43888	60	1.24907e-05
188	6.44735e-09	5.43889	60	1.11582e-05
190	5.77976e-09	5.4389	60	9.97671e-06
192	5.19436e-09	5.4389	60	8.92909e-06
194	4.67912e-09	5.43891	60	7.99968e-06
196	4.22326e-09	5.43892	60	7.17417e-06
198	3.81719e-09	5.43892	60	6.43958e-06
200	3.45246e-09	5.43893	60	5.7842e-06
202	3.12166e-09	5.43893	60	5.19751e-06
204	2.81841e-09	5.43894	60	4.67012e-06
206	2.53728e-09	5.43894	60	4.19375e-06
208	2.27373e-09	5.43894	60	3.76111e-06
210	2.02404e-09	5.43895	60	3.36587e-06
212	1.78745e-09	5.43895	60	3.00345e-06
214	1.57274e-09	5.43895	60	2.67412e-06
216	1.37979e-09	5.43895	60	2.37614e-06
218	1.20705e-09	5.43895	60	2.10739e-06
220	1.05307e-09	5.43896	60	1.86581e-06
222	9.16412e-10	5.43896	60	1.64943e-06
224	7.95742e-10	5.43896	60	1.45636e-06
226	6.8976e-10	5.43896	60	1.28479e-06
228	5.97232e-10	5.43896	60	1.133e-06
230	5.16977e-10	5.43896	60	9.99347e-07
232	4.47873e-10	5.43896	60	8.82246e-07
234	3.88849e-10	5.43896	60	7.80201e-07
236	3.38892e-10	5.43896	60	6.91786e-07
238	2.97035e-10	5.43897	60	6.15647e-07
240	2.62367e-10	5.43897	60	5.505e-07
242	2.34026e-10	5.43897	60	4.95127e-07
244	2.11196e-10	5.43897	60	4.48381e-07
246	1.93112e-10	5.43897	60	4.09177e-07
248	1.79055e-10	5.43897	60	3.76496e-07
250	1.68349e-10	5.43897	60	3.4938e-07
252	1.60366e-10	5.43897	60	3.26933e-07
254	1.54519e-10	5.43897	60	3.08319e-07
256	1.50264e-10	5.43897	60	2.92759e-07
258	1.47097e-10	5.43897	60	2.79529e-07
260	1.44555e-10	5.43897	60	2.67963e-07
262	1.42214e-10	5.43897	60	2.57446e-07
264	1.39686e-10	5.43897	60	2.47416e-07
266	1.36622e-10	5.43897	60	2.37361e-07
268	1.32707e-10	5.43897	60	2.26818e-07
270	1.2766e-10	5.43897	60	2.15371e-07
272	1.21234e-10	5.43897	60	2.02651e-07
274	1.13214e-10	5.43897	60	1.88332e-07
276	1.03416e-10	5.43897	60	1.72131e-07
278	9.19402e-11	5.43897	60	1.5412e-07
280	8.07159e-11	5.43897	60	1.36635e-07
282	7.01526e-11	5.43897	60	1.20173e-07
284	6.02296e-11	5.43897	60	1.047e-07
286	5.09261e-11	5.43897	60	9.01852e-08
288	4.2222e-11	5.43897	60	7.65965e-08
290	3.40972e-11	5.43897	60	6.39033e-08
292	2.65322e-11	5.43897	60	5.20752e-08
294	1.95075e-11	5.43897	60	4.10822e-08
296	1.3004e-11	5.43897	60	3.08948e-08
298	7.00292e-12	5.43897	60	2.14839e-08
300	1.48579e-12	5.43897	60	1.28209e-08
302	-3.56564e-12	5.43897	60	4.87765e-09
304	-8.1693e-12	5.43897	60	-2.37365e-09
306	-1.23429e-11	5.43897	60	-8.96026e-09
308	-1.61037e-11	5.43897	60	-1.49091e-08
310	-1.94688e-11	5.43897	60	-2.02465e-08
312	-2.24552e-11	5.43897	60	-2.49985e-08
314	-2.50792e-11	5.43897	60	-2.91907e-08
316	-2.73572e-11	5.43897	60	-3.28483e-08
318	-2.93051e-11	5.43897	60	-3.59959e-08
320	-3.09388e-11	5.43897	60	-3.86579e-08
322	-3.22735e-11	5.43897	60	-4.08582e-08
324	-3.33246e-11	5.43897	60	-4.26201e-08
326	-3.41069e-11	5.43897	60	-4.39669e-08
328	-3.4635e-11	5.43897	60	-4.49211e-08
330	-3.49234e-11	5.43897	60	-4.5505e-08
332	-3.49862e-11	5.43897	60	-4.57405e-08
334	-3.48373e-11	5.43897	60	-4.56489e-08
336	-3.44902e-11	5.43897	60	-4.52514e-08
338	-3.39584e-11	5.43897	60	-4.45685e-08
340	-3.32549e-11	5.43897	60	-4.36205e-08
342	-3.23925e-11	5.43897	60	-4.24274e-08
344	-3.13839e-11	5.43897	60	-4.10085e-08
346	-3.02415e-11	5.43897	60	-3.93829e-08
348	-2.89773e-11	5.43897	60	-3.75695e-08
350	-2.76031e-11	5.43897	60	-3.55864e-08
352	-2.61307e-11	5.43897	60	-3.34517e-08
354	-2.45713e-11	5.43897	60	-3.11829e-08
356	-2.29362e-11	5.43897	60	-2.87972e-08
358	-2.12361e-11	5.43897	60	-2.63116e-08
360	-1.94818e-11	5.43897	60	-2.37424e-08
362	-1.76837e-11	5.43897	60	-2.11057e-08
364	-1.58519e-11	5.43897	60	-1.84174e-08
366	-1.39965e-11	5.43897	60	-1.56927e-08
368	-1.21271e-11	5.43897	60	-1.29468e-08
370	-1.02533e-11	5.43897	60	-1.01943e-08
372	-8.38431e-12	5.43897	60	-7.4496e-09
374	-6.52919e-12	5.43897	60	-4.7266e-09
376	-4.69678e-12	5.43897	60	-2.03897e-09
378	-2.89568e-12	5.43897	60	5.99995e-10
380	-1.13428e-12	5.43897	60	3.17733e-09
382	5.79256e-13	5.43897	60	5.68041e-09
384	2.23697e-12	5.43897	60	8.09695e-09
386	3.83113e-12	5.43897	60	1.0415e-08
388	5.35421e-12	5.43897	60	1.26229e-08
390	6.79888e-12	5.43897	60	1.47094e-08
392	8.15805e-12	5.43897	60	1.66635e-08
394	9.42481e-12	5.43897	60	1.84745e-08
396	1.05925e-11	5.43897	60	2.01322e-08
398	1.16545e-11	5.43897	60	2.16264e-08
400	1.26047e-11	5.43897	60	2.29474e-08
402	1.3437e-11	5.43897	60	2.4086e-08
404	1.41453e-11	5.43897	60	2.50329e-08
406	1.47241e-11	5.43897	60	2.57793e-08
408	1.51679e-11	5.43897	60	2.63169e-08
410	1.54713e-11	5.43897	60	2.66373e-08
412	1.56293e-11	5.43897	60	2.67328e-08
414	1.56368e-11	5.43897	60	2.65956e-08
416	1.54893e-11	5.43897	60	2.62186e-08
418	1.5182e-11	5.43897	60	2.55946e-08
420	1.47108e-11	5.43897	60	2.4717e-08
422	1.40713e-11	5.43897	60	2.35793e-08
424	1.32596e-11	5.43897	60	2.21752e-08
426	1.22718e-11	5.43897	60	2.04991e-08
428	1.11044e-11	5.43897	60	1.85451e-08
430	9.8492e-12	5.43897	60	1.64565e-08
432	8.61476e-12	5.43897	60	1.44025e-08
434	7.40108e-12	5.43897	60	1.23831e-08
436	6.208e-12	5.43897	60	1.0398e-08
438	5.03536e-12	5.43897	60	8.44684e-09
440	3.88299e-12	5.43897	60	6.52945e-09
442	2.75073e-12	5.43897	60	4.64551e-09
444	1.63842e-12	5.43897	60	2.79478e-09
446	5.4589e-13	5.43897	60	9.76964e-10
448	-5.27012e-13	5.43897	60	-8.0819e-10
450	-1.58045e-12	5.43897	60	-2.56095e-09
452	-2.61458e-12	5.43897	60	-4.28159e-09
454	-3.62957e-12	5.43897	60	-5.97037e-09
456	-4.62557e-12	5.43897	60	-7.62755e-09
458	-5.60274e-12	5.43897	60	-9.2534e-09
460	-6.56125e-12	5.43897	60	-1.08482e-08
462	-7.50124e-12	5.43897	60	-1.24122e-08
464	-8.42287e-12	5.43897	60	-1.39456e-08
466	-9.32631e-12	5.43897	60	-1.54487e-08
468	-1.02117e-11	5.43897	60	-1.69219e-08
470	-1.10792e-11	5.43897	60	-1.83652e-08
472	-1.1929e-11	5.43897	60	-1.97791e-08
474	-1.27612e-11	5.43897	60	-2.11637e-08
476	-1.35759e-11	5.43897	60	-2.25193e-08
478	-1.43734e-11	5.43897	60	-2.38461e-08
480	-1.51538e-11	5.43897	60	-2.51445e-08
482	-1.59172e-11	5.43897	60	-2.64146e-08
484	-1.66638e-11	5.43897	60	-2.76568e-08
486	-1.73938e-11	5.43897	60	-2.88712e-08
488	-1.81072e-11	5.43897	60	-3.00581e-08
490	-1.88042e-11	5.43897	60	-3.12179e-08
492	-1.94851e-11	5.43897	60	-3.23506e-08
494	-2.01499e-11	5.43897	60	-3.34566e-08
496	-2.07987e-11	5.43897	60	-3.45361e-08
498	-2.14318e-11	5.43897	60	-3.55894e-08
500	-2.20493e-11	5.43897	60	-3.66167e-08
502	-2.26513e-11	5.43897	60	-3.76183e-08
504	-2.3238e-11	5.43897	60	-3.85944e-08
506	-2.38095e-11	5.43897	60	-3.95452e-08
508	-2.4366e-11	5.43897	60	-4.04709e-08
510	-2.49076e-11	5.43897	60	-4.13719e-08
512	-2.54344e-11	5.43897	60	-4.22484e-08
514	-2.59467e-11	5.43897	60	-4.31006e-08
516	-2.64445e-11	5.43897	60	-4.39288e-08
518	-2.69279e-11	5.43897	60	-4.47331e-08
520	-2.73973e-11	5.43897	60	-4.55138e-08
522	-2.78525e-11	5.43897	60	-4.62712e-08
524	-2.82939e-11	5.43897	60	-4.70055e-08
526	-2.87216e-11	5.43897	60	-4.7717e-08
528	-2.91357e-11	5.43897	60	-4.84058e-08
530	-2.95362e-11	5.43897	60	-4.90722e-08
532	-2.99235e-11	5.43897	60	-4.97164e-08
534	-3.02976e-11	5.43897	60	-5.03387e-08
536	-3.06586e-11	5.43897	60	-5.09393e-08
538	-3.10068e-11	5.43897	60	-5.15184e-08
540	-3.13421e-11	5.43897	60	-5.20762e-08
542	-3.16649e-11	5.43897	60	-5.26131e-08
544	-3.19751e-11	5.43897	60	-5.31291e-08
546	-3.2273e-11	5.43897	60	-5.36246e-08
548	-3.25587e-11	5.43897	60	-5.40998e-08
550	-3.28322e-11	5.43897	60	-5.45548e-08
552	-3.30939e-11	5.43897	60	-5.499e-08
554	-3.33437e-11	5.43897	60	-5.54055e-08
556	-3.35818e-11	5.43897	60	-5.58016e-08
558	-3.38084e-11	5.43897	60	-5.61784e-08
560	-3.40235e-11	5.43897	60	-5.65362e-08
562	-3.42274e-11	5.43897	60	-5.68753e-08
564	-3.44201e-11	5.43897	60	-5.71958e-08
566	-3.46018e-11	5.43897	60	-5.7498e-08
568	-3.47726e-11	5.43897	60	-5.77821e-08
570	-3.49327e-11	5.43897	60	-5.80482e-08
572	-3.50821e-11	5.43897	60	-5.82967e-08
574	-3.5221e-11	5.43897	60	-5.85277e-08
576	-3.53496e-11	5.43897	60	-5.87414e-08
578	-3.54679e-11	5.43897	60	-5.89381e-08
580	-3.55761e-11	5.43897	60	-5.9118e-08
582	-3.56743e-11	5.43897	60	-5.92813e-08
584	-3.57626e-11	5.43897	60	-5.94281e-08
586	-3.58412e-11	5.43897	60	-5.95588e-08
588	-3.59102e-11	5.43897	60	-5.96735e-08
590	-3.59698e-11	5.43897	60	-5.97724e-08
592	-3.602e-11	5.43897	60	-5.98557e-08
594	-3.60609e-11	5.43897	60	-5.99237e-08
596	-3.60927e-11	5.43897	60	-5.99766e-08
598	-3.61156e-11	5.43897	60	-6.00145e-08
600	-3.61296e-11	5.43897	60	-6.00376e-08
602	-3.61349e-11	5.43897	60	-6.00462e-08
604	-3.61315e-11	5.43897	60	-6.00405e-08
606	-3.61197e-11	5.43897	60	-6.00207e-08
608	-3.60995e-11	5.43897	60	-5.9987e-08
610	-3.6071e-11	5.43897	60	-5.99395e-08
612	-3.60344e-11	5.43897	60	-5.98785e-08
614	-3.59899e-11	5.43897	60	-5.98042e-08
616	-3.59374e-11	5.43897	60	-5.97167e-08
618	-3.58771e-11	5.43897	60	-5.96164e-08
620	-3.58092e-11	5.43897	60	-5.95033e-08
622	-3.57338e-11	5.43897	60	-5.93776e-08
624	-3.5651e-11	5.43897	60	-5.92397e-08
626	-3.55608e-11	5.43897	60	-5.90896e-08
628	-3.54635e-11	5.43897	60	-5.89276e-08
630	-3.53592e-11	5.43897	60	-5.87538e-08
632	-3.52478e-11	5.43897	60	-5.85684e-08
634	-3.51297e-11	5.43897	60	-5.83717e-08
636	-3.50048e-11	5.43897	60	-5.81639e-08
638	-3.48733e-11	5.43897	60	-5.7945e-08
640	-3.47354e-11	5.43897	60	-5.77153e-08
642	-3.4591e-11	5.43897	60	-5.74751e-08
644	-3.44404e-11	5.43897	60	-5.72244e-08
646	-3.42837e-11	5.43897	60	-5.69635e-08
648	-3.41209e-11	5.43897	60	-5.66926e-08
650	-3.39522e-11	5.43897	60	-5.64118e-08
652	-3.37777e-11	5.43897	60	-5.61213e-08
654	-3.35975e-11	5.43897	60	-5.58214e-08
656	-3.34117e-11	5.43897	60	-5.55122e-08
658	-3.32204e-11	5.43897	60	-5.51938e-08
660	-3.30237e-11	5.43897	60	-5.48665e-08
662	-3.28218e-11	5.43897	60	-5.45305e-08
664	-3.26147e-11	5.43897	60	-5.41858e-08
666	-3.24026e-11	5.43897	60	-5.38328e-08
668	-3.21856e-11	5.43897	60	-5.34716e-08
670	-3.19637e-11	5.43897	60	-5.31024e-08
672	-3.17371e-11	5.43897	60	-5.27253e-08
674	-3.15058e-11	5.43897	60	-5.23405e-08
676	-3.12701e-11	5.43897	60	-5.19482e-08
678	-3.103e-11	5.43897	60	-5.15486e-08
680	-3.07855e-11	5.43897	60	-5.11418e-08
682	-3.05369e-11	5.43897	60	-5.07281e-08
684	-3.02842e-11	5.43897	60	-5.03075e-08
686	-3.00274e-11	5.43897	60	-4.98804e-08
688	-2.97669e-11	5.43897	60	-4.94467e-08
690	-2.95025e-11	5.43897	60	-4.90068e-08
692	-2.92344e-11	5.43897	60	-4.85608e-08
694	-2.89628e-11	5.43897	60	-4.81088e-08
696	-2.86877e-11	5.43897	60	-4.76511e-08
698	-2.84092e-11	5.43897	60	-4.71877e-08
700	-2.81274e-11	5.43897	60	-4.67189e-08
702	-2.78425e-11	5.43897	60	-4.62448e-08
704	-2.75545e-11	5.43897	60	-4.57656e-08
706	-2.72635e-11	5.43897	60	-4.52815e-08
708	-2.69697e-11	5.43897	60	-4.47925e-08
710	-2.66731e-11	5.43897	60	-4.4299e-08
712	-2.63738e-11	5.43897	60	-4.3801e-08
714	-2.60719e-11	5.43897	60	-4.32988e-08
716	-2.57675e-11	5.43897	60	-4.27924e-08
718	-2.54608e-11	5.43897	60	-4.2282e-08
720	-2.51517e-11	5.43897	60	-4.17678e-08
722	-2.48405e-11	5.43897	60	-4.125e-08
724	-2.45272e-11	5.43897	60	-4.07287e-08
726	-2.42118e-11	5.43897	60	-4.02041e-08
728	-2.38946e-11	5.43897	60	-3.96763e-08
730	-2.35755e-11	5.43897	60	-3.91455e-08
732	-2.32548e-11	5.43897	60	-3.86118e-08
734	-2.29324e-11	5.43897	60	-3.80754e-08
736	-2.26084e-11	5.43897	60	-3.75365e-08
738	-2.2283e-11	5.43897	60	-3.69952e-08
740	-2.19563e-11	5.43897	60	-3.64516e-08
742	-2.16283e-11	5.43897	60	-3.5906e-08
744	-2.12991e-11	5.43897	60	-3.53584e-08
746	-2.09689e-11	5.43897	60	-3.4809e-08
748	-2.06377e-11	5.43897	60	-3.4258e-08
750	-2.03056e-11	5.43897	60	-3.37055e-08
752	-1.99726e-11	5.43897	60	-3.31517e-08
754	-1.9639e-11	5.43897	60	-3.25966e-08
756	-1.93047e-11	5.43897	60	-3.20406e-08
758	-1.89699e-11	5.43897	60	-3.14836e-08
760	-1.86347e-11	5.43897	60	-3.09259e-08
762	-1.8299e-11	5.43897	60	-3.03676e-08
764	-1.79631e-11	5.43897	60	-2.98088e-08
766	-1.7627e-11	5.43897	60	-2.92498e-08
768	-1.72908e-11	5.43897	60	-2.86905e-08
770	-1.69546e-11	5.43897	60	-2.81312e-08
772	-1.66184e-11	5.43897	60	-2.75721e-08
774	-1.62824e-11	5.43897	60	-2.70132e-08
776	-1.59467e-11	5.43897	60	-2.64547e-08
778	-1.56112e-11	5.43897	60	-2.58967e-08
780	-1.52762e-11	5.43897	60	-2.53394e-08
782	-1.49416e-11	5.43897	60	-2.47829e-08
784	-1.46076e-11	5.43897	60	-2.42274e-08
786	-1.42743e-11	5.43897	60	-2.36729e-08
788	-1.39416e-11	5.43897	60	-2.31197e-08
790	-1.36098e-11	5.43897	60	-2.25679e-08
792	-1.32789e-11	5.43897	60	-2.20175e-08
794	-1.2949e-11	5.43897	60	-2.14688e-08
796	-1.26202e-11	5.43897	60	-2.09218e-08
798	-1.22924e-11	5.43897	60	-2.03768e-08
800	-1.19659e-11	5.43897	60	-1.98337e-08
802	-1.16407e-11	5.43897	60	-1.92929e-08
804	-1.13169e-11	5.43897	60	-1.87543e-08
806	-1.09945e-11	5.43897	60	-1.82181e-08
808	-1.06736e-11	5.43897	60	-1.76846e-08
810	-1.03544e-11	5.43897	60	-1.71536e-08
812	-1.00368e-11	5.43897	60	-1.66255e-08
814	-9.721e-12	5.43897	60	-1.61004e-08
816	-9.40704e-12	5.43897	60	-1.55783e-08
818	-9.095e-12	5.43897	60	-1.50594e-08
820	-8.78494e-12	5.43897	60	-1.45438e-08
822	-8.47695e-12	5.43897	60	-1.40316e-08
824	-8.1711e-12	5.43897	60	-1.35231e-08
826	-7.86747e-12	5.43897	60	-1.30182e-08
828	-7.56612e-12	5.43897	60	-1.25171e-08
830	-7.26714e-12	5.43897	60	-1.202e-08
832	-6.97059e-12	5.43897	60	-1.15269e-08
834	-6.67654e-12	5.43897	60	-1.1038e-08
836	-6.38508e-12	5.43897	60	-1.05534e-08
838	-6.09627e-12	5.43897	60	-1.00732e-08
840	-5.81019e-12	5.43897	60	-9.59758e-09
842	-5.5269e-12	5.43897	60	-9.1266e-09
844	-5.24648e-12	5.43897	60	-8.6604e-09
846	-4.96899e-12	5.43897	60	-8.19908e-09
848	-4.69451e-12	5.43897	60	-7.74278e-09
850	-4.4231e-12	5.43897	60	-7.2916e-09
852	-4.15484e-12	5.43897	60	-6.84566e-09
854	-3.88979e-12	5.43897	60	-6.40507e-09
856	-3.62803e-12	5.43897	60	-5.96996e-09
858	-3.36962e-12	5.43897	60	-5.54042e-09
860	-3.11462e-12	5.43897	60	-5.11658e-09
862	-2.86311e-12	5.43897	60	-4.69854e-09
864	-2.61515e-12	5.43897	60	-4.28643e-09
866	-2.37081e-12	5.43897	60	-3.88034e-09
868	-2.13016e-12	5.43897	60	-3.48038e-09
870	-1.89325e-12	5.43897	60	-3.08668e-09
872	-1.66017e-12	5.43897	60	-2.69933e-09
874	-1.43096e-12	5.43897	60	-2.31845e-09
876	-1.2057e-12	5.43897	60	-1.94413e-09
878	-9.84444e-13	5.43897	60	-1.5765e-09
880	-7.67266e-13	5.43897	60	-1.21565e-09
882	-5.54224e-13	5.43897	60	-8.61695e-10
884	-3.45382e-13	5.43897	60	-5.14733e-10
886	-1.40803e-13	5.43897	60	-1.7487e-10
888	5.94515e-14	5.43897	60	1.57789e-10
890	2.55319e-13	5.43897	60	4.83141e-10
892	4.46738e-13	5.43897	60	8.01085e-10
894	6.33647e-13	5.43897	60	1.11152e-09
896	8.15986e-13	5.43897	60	1.41434e-09
898	9.93694e-13	5.43897	60	1.70945e-09
900	1.16671e-12	5.43897	60	1.99674e-09
902	1.33498e-12	5.43897	60	2.27613e-09
904	1.49844e-12	5.43897	60	2.5475e-09
906	1.65702e-12	5.43897	60	2.81077e-09
908	1.81068e-12	5.43897	60	3.06583e-09
910	1.95936e-12	5.43897	60	3.31259e-09
912	2.10299e-12	5.43897	60	3.55094e-09
914	2.24152e-12	5.43897	60	3.78081e-09
916	2.3749e-12	5.43897	60	4.00208e-09
918	2.50306e-12	5.43897	60	4.21467e-09
920	2.62595e-12	5.43897	60	4.41849e-09
922	2.74351e-12	5.43897	60	4.61343e-09
924	2.85569e-12	5.43897	60	4.79941e-09
926	2.96243e-12	5.43897	60	4.97633e-09
928	3.06368e-12	5.43897	60	5.14411e-09
930	3.15938e-12	5.43897	60	5.30265e-09
932	3.24949e-12	5.43897	60	5.45187e-09
934	3.33393e-12	5.43897	60	5.59166e-09
936	3.41267e-12	5.43897	60	5.72196e-09
938	3.48565e-12	5.43897	60	5.84266e-09
940	3.55282e-12	5.43897	60	5.95367e-09
942	3.61411e-12	5.43897	60	6.05492e-09
944	3.66949e-12	5.43897	60	6.14632e-09
946	3.7189e-12	5.43897	60	6.22777e-09
948	3.76229e-12	5.43897	60	6.2992e-09
950	3.79961e-12	5.43897	60	6.36051e-09
952	3.83081e-12	5.43897	60	6.41164e-09
954	3.85583e-12	5.43897	60	6.45248e-09
956	3.87463e-12	5.43897	60	6.48296e-09
958	3.88716e-12	5.43897	60	6.503e-09
960	3.89337e-12	5.43897	60	6.51252e-09
962	3.8932e-12	5.43897	60	6.51143e-09
964	3.88663e-12	5.43897	60	6.49965e-09
966	3.87358e-12	5.43897	60	6.4771e-09
968	3.85402e-12	5.43897	60	6.44371e-09
970	3.8279e-12	5.43897	60	6.3994e-09
972	3.79517e-12	5.43897	60	6.34408e-09
974	3.75579e-12	5.43897	60	6.27768e-09
976	3.70971e-12	5.43897	60	6.20013e-09
978	3.65688e-12	5.43897	60	6.11134e-09
980	3.59726e-12	5.43897	60	6.01124e-09
982	3.5308e-12	5.43897	60	5.89976e-09
984	3.45746e-12	5.43897	60	5.77682e-09
986	3.37719e-12	5.43897	60	5.64234e-09
988	3.28995e-12	5.43897	60	5.49626e-09
990	3.1957e-12	5.43897	60	5.3385e-09
992	3.09439e-12	5.43897	60	5.16898e-09
994	2.98597e-12	5.43897	60	4.98764e-09
996	2.87041e-12	5.43897	60	4.79441e-09
998	2.74767e-12	5.43897	60	4.58921e-09
1000	2.6177e-12	5.43897	60	4.37198e-09
1002	2.48045e-12	5.43897	60	4.14263e-09
1004	2.3359e-12	5.43897	60	3.90112e-09
1006	2.18399e-12	5.43897	60	3.64736e-09
1008	2.02469e-12	5.43897	60	3.38129e-09
1010	1.85795e-12	5.43897	60	3.10285e-09
1012	1.68374e-12	5.43897	60	2.81196e-09
1014	1.59332e-12	5.43897	60	2.66099e-09
1016	1.5923e-12	5.43897	60	2.65929e-09
1018	1.59129e-12	5.43897	60	2.65759e-09
1020	1.59027e-12	5.43897	60	2.65589e-09
1022	1.58925e-12	5.43897	60	2.65419e-09
1024	1.58823e-12	5.43897	60	2.65249e-09
1026	1.58721e-12	5.43897	60	2.65079e-09
1028	1.5862e-12	5.43897	60	2.64909e-09
1030	1.58518e-12	5.43897	60	2.64739e-09
1032	1.58416e-12	5.43897	60	2.64569e-09
1034	1.58314e-12	5.43897	60	2.64399e-09
1036	1.58212e-12	5.43897	60	2.64228e-09
1038	1.58111e-12	5.43897	60	2.64058e-09
1040	1.58009e-12	5.43897	60	2.63888e-09
1042	1.57907e-12	5.43897	60	2.63718e-09
1044	1.57805e-12	5.43897	60	2.63548e-09
1046	1.57703e-12	5.43897	60	2.63378e-09
1048	1.57601e-12	5.43897	60	2.63208e-09
1050	1.575e-12	5.43897	60	2.63038e-09
1052	1.57398e-12	5.43897	60	2.62868e-09
1054	1.57296e-12	5.43897	60	2.62698e-09
1056	1.57194e-12	5.43897	60	2.62528e-09
1058	1.57092e-12	5.43897	60	2.62358e-09
1060	1.56991e-12	5.43897	60	2.62188e-09
1062	1.56889e-12	5.43897	60	2.62018e-09
1064	1.56787e-12	5.43897	60	2.61848e-09
1066	1.56685e-12	5.43897	60	2.61678e-09
1068	1.56583e-12	5.43897	60	2.61508e-09
1070	1.56481e-12	5.43897	60	2.61338e-09
1072	1.5638e-12	5.43897	60	2.61168e-09
1074	1.56278e-12	5.43897	60	2.60998e-09
1076	1.56176e-12	5.43897	60	2.60828e-09
1078	1.56074e-12	5.43897	60	2.60658e-09
1080	1.55972e-12	5.43897	60	2.60488e-09
1082	1.55871e-12	5.43897	60	2.60318e-09
1084	1.55769e-12	5.43897	60	2.60148e-09
1086	1.55667e-12	5.43897	60	2.59978e-09
1088	1.55565e-12	5.43897	60	2.59807e-09
1090	1.55463e-12	5.43897	60	2.59637e-09
1092	1.55362e-12	5.43897	60	2.59467e-09
1094	1.5526e-12	5.43897	60	2.59297e-09
1096	1.55158e-12	5.43897	60	2.59127e-09
1098	1.55056e-12	5.43897	60	2.58957e-09
1100	1.54954e-12	5.43897	60	2.58787e-09
1102	1.54852e-12	5.43897	60	2.58617e-09
1104	1.54751e-12	5.43897	60	2.58447e-09
1106	1.54649e-12	5.43897	60	2.58277e-09
1108	1.54547e-12	5.43897	60	2.58107e-09
1110	1.54445e-12	5.43897	60	2.57937e-09
1112	1.54343e-12	5.43897	60	2.57767e-09
1114	1.54242e-12	5.43897	60	2.57597e-09
1116	1.5414e-12	5.43897	60	2.57427e-09
1118	1.54038e-12	5.43897	60	2.57257e-09
1120	1.53936e-12	5.43897	60	2.57087e-09
1122	1.53834e-12	5.43897	60	2.56917e-09
1124	1.53733e-12	5.43897	60	2.56747e-09
1126	1.53631e-12	5.43897	60	2.56577e-09
1128	1.53529e-12	5.43897	60	2.56407e-09
1130	1.53427e-12	5.43897	60	2.56237e-09
1132	1.53325e-12	5.43897	60	2.56067e-09
1134	1.53223e-12	5.43897	60	2.55897e-09
1136	1.53122e-12	5.43897	60	2.55727e-09
1138	1.5302e-12	5.43897	60	2.55557e-09
1140	1.52918e-12	5.43897	60	2.55387e-09
1142	1.52816e-12	5.43897	60	2.55216e-09
1144	1.52714e-12	5.43897	60	2.55046e-09
1146	1.52613e-12	5.43897	60	2.54876e-09
1148	1.52511e-12	5.43897	60	2.54706e-09
1150	1.52409e-12	5.43897	60	2.54536e-09
1152	1.52307e-12	5.43897	60	2.54366e-09
1154	1.52205e-12	5.43897	60	2.54196e-09
1156	1.52103e-12	5.43897	60	2.54026e-09
1158	1.52002e-12	5.43897	60	2.53856e-09
1160	1.519e-12	5.43897	60	2.53686e-09
1162	1.51798e-12	5.43897	60	2.53516e-09
1164	1.51696e-12	5.43897	60	2.53346e-09
1166	1.51594e-12	5.43897	60	2.53176e-09
1168	1.51493e-12	5.43897	60	2.53006e-09
1170	1.51391e-12	5.43897	60	2.52836e-09
1172	1.51289e-12	5.43897	60	2.52666e-09
1174	1.51187e-12	5.43897	60	2.52496e-09
1176	1.51085e-12	5.43897	60	2.52326e-09
1178	1.50984e-12	5.43897	60	2.52156e-09
1180	1.50882e-12	5.43897	60	2.51986e-09
1182	1.5078e-12	5.43897	60	2.51816e-09
1184	1.50678e-12	5.43897	60	2.51646e-09
1186	1.50576e-12	5.43897	60	2.51476e-09
1188	1.50474e-12	5.43897	60	2.51306e-09
1190	1.50373e-12	5.43897	60	2.51136e-09
1192	1.50271e-12	5.43897	60	2.50966e-09
1194	1.50169e-12	5.43897	60	2.50795e-09
1196	1.50067e-12	5.43897	60	2.50625e-09
1198	1.49965e-12	5.43897	60	2.50455e-09
1200	1.49864e-12	5.43897	60	2.50285e-09
1202	1.49762e-12	5.43897	60	2.50115e-09
1204	1.4966e-12	5.43897	60	2.49945e-09
1206	1.49558e-12	5.43897	60	2.49775e-09
1208	1.49456e-12	5.43897	60	2.49605e-09
1210	1.49355e-12	5.43897	60	2.49435e-09
1212	1.49253e-12	5.43897	60	2.49265e-09
1214	1.49151e-12	5.43897	60	2.49095e-09
1216	1.49049e-12	5.43897	60	2.48925e-09
1218	1.48947e-12	5.43897	60	2.48755e-09
1220	1.48845e-12	5.43897	60	2.48585e-09
1222	1.48744e-12	5.43897	60	2.48415e-09
1224	1.48642e-12	5.43897	60	2.48245e-09
1226	1.4854e-12	5.43897	60	2.48075e-09
1228	1.48438e-12	5.43897	60	2.47905e-09
1230	1.48336e-12	5.43897	60	2.47735e-09
1232	1.48235e-12	5.43897	60	2.47565e-09
1234	1.48133e-12	5.43897	60	2.47395e-09
1236	1.48031e-12	5.43897	60	2.47225e-09
1238	1.47929e-12	5.43897	60	2.47055e-09
1240	1.47827e-12	5.43897	60	2.46885e-09
1242	1.47726e-12	5.43897	60	2.46715e-09
1244	1.47624e-12	5.43897	60	2.46545e-09
1246	1.47522e-12	5.43897	60	2.46374e-09
1248	1.4742e-12	5.43897	60	2.46204e-09
1250	1.47318e-12	5.43897	60	2.46034e-09
1252	1.47216e-12	5.43897	60	2.45864e-09
1254	1.47115e-12	5.43897	60	2.45694e-09
1256	1.47013e-12	5.43897	60	2.45524e-09
1258	1.46911e-12	5.43897	60	2.45354e-09
1260	1.46809e-12	5.43897	60	2.45184e-09
1262	1.46707e-12	5.43897	60	2.45014e-09
1264	1.46606e-12	5.43897	60	2.44844e-09
1266	1.46504e-12	5.43897	60	2.44674e-09
1268	1.46402e-12	5.43897	60	2.44504e-09
1270	1.463e-12	5.43897	60	2.44334e-09
1272	1.46198e-12	5.43897	60	2.44164e-09
1274	1.46096e-12	5.43897	60	2.43994e-09
1276	1.45995e-12	5.43897	60	2.43824e-09
1278	1.45893e-12	5.43897	60	2.43654e-09
1280	1.45791e-12	5.43897	60	2.43484e-09
1282	1.45689e-12	5.43897	60	2.43314e-09
1284	1.45587e-12	5.43897	60	2.43144e-09
1286	1.45486e-12	5.43897	60	2.42974e-09
1288	1.45384e-12	5.43897	60	2.42804e-09
1290	1.45282e-12	5.43897	60	2.42634e-09
1292	1.4518e-12	5.43897	60	2.42464e-09
1294	1.45078e-12	5.43897	60	2.42294e-09
1296	1.44977e-12	5.43897	60	2.42124e-09
1298	1.44875e-12	5.43897	60	2.41954e-09
1300	1.44773e-12	5.43897	60	2.41783e-09
1302	1.44671e-12	5.43897	60	2.41613e-09
1304	1.44569e-12	5.43897	60	2.41443e-09
1306	1.44467e-12	5.43897	60	2.41273e-09
1308	1.44366e-12	5.43897	60	2.41103e-09
1310	1.44264e-12	5.43897	60	2.40933e-09
1312	1.44162e-12	5.43897	60	2.40763e-09
1314	1.4406e-12	5.43897	60	2.40593e-09
1316	1.43958e-12	5.43897	60	2.40423e-09
1318	1.43857e-12	5.43897	60	2.40253e-09
1320	1.43755e-12	5.43897	60	2.40083e-09
1322	1.43653e-12	5.43897	60	2.39913e-09
1324	1.43551e-12	5.43897	60	2.39743e-09
1326	1.43449e-12	5.43897	60	2.39573e-09
1328	1.43348e-12	5.43897	60	2.39403e-09
1330	1.43246e-12	5.43897	60	2.39233e-09
1332	1.43144e-12	5.43897	60	2.39063e-09
1334	1.43042e-12	5.43897	60	2.38893e-09
1336	1.4294e-12	5.43897	60	2.38723e-09
1338	1.42838e-12	5.43897	60	2.38553e-09
1340	1.42737e-12	5.43897	60	2.38383e-09
1342	1.42635e-12	5.43897	60	2.38213e-09
1344	1.42533e-12	5.43897	60	2.38043e-09
1346	1.42431e-12	5.43897	60	2.37873e-09
1348	1.42329e-12	5.43897	60	2.37703e-09
1350	1.42228e-12	5.43897	60	2.37533e-09
1352	1.42126e-12	5.43897	60	2.37362e-09
1354	1.42024e-12	5.43897	60	2.37192e-09
1356	1.41922e-12	5.43897	60	2.37022e-09
1358	1.4182e-12	5.43897	60	2.36852e-09
1360	1.41718e-12	5.43897	60	2.36682e-09
1362	1.41617e-12	5.43897	60	2.36512e-09
1364	1.41515e-12	5.43897	60	2.36342e-09
1366	1.41413e-12	5.43897	60	2.36172e-09
1368	1.41311e-12	5.43897	60	2.36002e-09
1370	1.41209e-12	5.43897	60	2.35832e-09
1372	1.41108e-12	5.43897	60	2.35662e-09
1374	1.41006e-12	5.43897	60	2.35492e-09
1376	1.40904e-12	5.43897	60	2.35322e-09
1378	1.40802e-12	5.43897	60	2.35152e-09
1380	1.407e-12	5.43897	60	2.34982e-09
1382	1.40599e-12	5.43897	60	2.34812e-09
1384	1.40497e-12	5.43897	60	2.34642e-09
1386	1.40395e-12	5.43897	60	2.34472e-09
1388	1.40293e-12	5.43897	60	2.34302e-09
1390	1.40191e-12	5.43897	60	2.34132e-09
1392	1.40089e-12	5.43897	60	2.33962e-09
1394	1.39988e-12	5.43897	60	2.33792e-09
1396	1.39886e-12	5.43897	60	2.33622e-09
1398	1.39784e-12	5.43897	60	2.33452e-09
1400	1.39682e-12	5.43897	60	2.33282e-09
1402	1.3958e-12	5.43897	60	2.33112e-09
1404	1.39479e-12	5.43897	60	2.32942e-09
1406	1.39377e-12	5.43897	60	2.32771e-09
1408	1.39275e-12	5.43897	60	2.32601e-09
1410	1.39173e-12	5.43897	60	2.32431e-09
1412	1.39071e-12	5.43897	60	2.32261e-09
1414	1.3897e-12	5.43897	60	2.32091e-09
1416	1.38868e-12	5.43897	60	2.31921e-09
1418	1.38766e-12	5.43897	60	2.31751e-09
1420	1.38664e-12	5.43897	60	2.31581e-09
1422	1.38562e-12	5.43897	60	2.31411e-09
1424	1.3846e-12	5.43897	60	2.31241e-09
1426	1.38359e-12	5.43897	60	2.31071e-09
1428	1.38257e-12	5.43897	60	2.30901e-09
1430	1.38155e-12	5.43897	60	2.30731e-09
1432	1.38053e-12	5.43897	60	2.30561e-09
1434	1.37951e-12	5.43897	60	2.30391e-09
1436	1.3785e-12	5.43897	60	2.30221e-09
1438	1.37748e-12	5.43897	60	2.30051e-09
1440	1.37646e-12	5.43897	60	2.29881e-09
1442	1.37544e-12	5.43897	60	2.29711e-09
1444	1.37442e-12	5.43897	60	2.29541e-09
1446	1.37341e-12	5.43897	60	2.29371e-09
1448	1.37239e-12	5.43897	60	2.29201e-09
1450	1.37137e-12	5.43897	60	2.29031e-09
1452	1.37035e-12	5.43897	60	2.28861e-09
1454	1.36933e-12	5.43897	60	2.28691e-09
1456	1.36831e-12	5.43897	60	2.28521e-09
1458	1.3673e-12	5.43897	60	2.2835e-09
1460	1.36628e-12	5.43897	60	2.2818e-09
1462	1.36526e-12	5.43897	60	2.2801e-09
1464	1.36424e-12	5.43897	60	2.2784e-09
1466	1.36322e-12	5.43897	60	2.2767e-09
1468	1.36221e-12	5.43897	60	2.275e-09
1470	1.36119e-12	5.43897	60	2.2733e-09
1472	1.36017e-12	5.43897	60	2.2716e-09
1474	1.35915e-12	5.43897	60	2.2699e-09
1476	1.35813e-12	5.43897	60	2.2682e-09
1478	1.35711e-12	5.43897	60	2.2665e-09
1480	1.3561e-12	5.43897	60	2.2648e-09
1482	1.35508e-12	5.43897	60	2.2631e-09
1484	1.35406e-12	5.43897	60	2.2614e-09
1486	1.35304e-12	5.43897	60	2.2597e-09
1488	1.35202e-12	5.43897	60	2.258e-09
1490	1.35101e-12	5.43897	60	2.2563e-09
1492	1.34999e-12	5.43897	60	2.2546e-09
1494	1.34897e-12	5.43897	60	2.2529e-09
1496	1.34795e-12	5.43897	60	2.2512e-09
1498	1.34693e-12	5.43897	60	2.2495e-09
1500	1.34592e-12	5.43897	60	2.2478e-09
1502	1.3449e-12	5.43897	60	2.2461e-09
1504	1.34388e-12	5.43897	60	2.2444e-09
1506	1.34286e-12	5.43897	60	2.2427e-09
1508	1.34184e-12	5.43897	60	2.241e-09
1510	1.34082e-12	5.43897	60	2.23929e-09
1512	1.33981e-12	5.43897	60	2.23759e-09
1514	1.33879e-12	5.43897	60	2.23589e-09
1516	1.33777e-12	5.43897	60	2.23419e-09
1518	1.33675e-12	5.43897	60	2.23249e-09
1520	1.33573e-12	5.43897	60	2.23079e-09
1522	1.33472e-12	5.43897	60	2.22909e-09
1524	1.3337e-12	5.43897	60	2.22739e-09
1526	1.33268e-12	5.43897	60	2.22569e-09
1528	1.33166e-12	5.43897	60	2.22399e-09
1530	1.33064e-12	5.43897	60	2.22229e-09
1532	1.32963e-12	5.43897	60	2.22059e-09
1534	1.32861e-12	5.43897	60	2.21889e-09
1536	1.32759e-12	5.43897	60	2.21719e-09
1538	1.32657e-12	5.43897	60	2.21549e-09
1540	1.32555e-12	5.43897	60	2.21379e-09
1542	1.32453e-12	5.43897	60	2.21209e-09
1544	1.32352e-12	5.43897	60	2.21039e-09
1546	1.3225e-12	5.43897	60	2.20869e-09
1548	1.32148e-12	5.43897	60	2.20699e-09
1550	1.32046e-12	5.43897	60	2.20529e-09
1552	1.31944e-12	5.43897	60	2.20359e-09
1554	1.31843e-12	5.43897	60	2.20189e-09
1556	1.31741e-12	5.43897	60	2.20019e-09
1558	1.31639e-12	5.43897	60	2.19849e-09
1560	1.31537e-12	5.43897	60	2.19679e-09
1562	1.31435e-12	5.43897	60	2.19509e-09
1564	1.31333e-12	5.43897	60	2.19338e-09
1566	1.31232e-12	5.43897	60	2.19168e-09
1568	1.3113e-12	5.43897	60	2.18998e-09
1570	1.31028e-12	5.43897	60	2.18828e-09
1572	1.30926e-12	5.43897	60	2.18658e-09
1574	1.30824e-12	5.43897	60	2.18488e-09
1576	1.30723e-12	5.43897	60	2.18318e-09
1578	1.30621e-12	5.43897	60	2.18148e-09
1580	1.30519e-12	5.43897	60	2.17978e-09
1582	1.30417e-12	5.43897	60	2.17808e-09
1584	1.30315e-12	5.43897	60	2.17638e-09
1586	1.30214e-12	5.43897	60	2.17468e-09
1588	1.30112e-12	5.43897	60	2.17298e-09
1590	1.3001e-12	5.43897	60	2.17128e-09
1592	1.29908e-12	5.43897	60	2.16958e-09
1594	1.29806e-12	5.43897	60	2.16788e-09
1596	1.29704e-12	5.43897	60	2.16618e-09
1598	1.29603e-12	5.43897	60	2.16448e-09
1600	1.29501e-12	5.43897	60	2.16278e-09
1602	1.29399e-12	5.43897	60	2.16108e-09
1604	1.29297e-12	5.43897	60	2.15938e-09
1606	1.29195e-12	5.43897	60	2.15768e-09
1608	1.29094e-12	5.43897	60	2.15598e-09
1610	1.28992e-12	5.43897	60	2.15428e-09
1612	1.2889e-12	5.43897	60	2.15258e-09
1614	1.28788e-12	5.43897	60	2.15088e-09
1616	1.28686e-12	5.43897	60	2.14917e-09
1618	1.28585e-12	5.43897	60	2.14747e-09
1620	1.28483e-12	5.43897	60	2.14577e-09
1622	1.28381e-12	5.43897	60	2.14407e-09
1624	1.28279e-12	5.43897	60	2.14237e-09
1626	1.28177e-12	5.43897	60	2.14067e-09
1628	1.28075e-12	5.43897	60	2.13897e-09
1630	1.27974e-12	5.43897	60	2.13727e-09
1632	1.27872e-12	5.43897	60	2.13557e-09
1634	1.2777e-12	5.43897	60	2.13387e-09
1636	1.27668e-12	5.43897	60	2.13217e-09
1638	1.27566e-12	5.43897	60	2.13047e-09
1640	1.27465e-12	5.43897	60	2.12877e-09
1642	1.27363e-12	5.43897	60	2.12707e-09
1644	1.27261e-12	5.43897	60	2.12537e-09
1646	1.27159e-12	5.43897	60	2.12367e-09
1648	1.27057e-12	5.43897	60	2.12197e-09
1650	1.26956e-12	5.43897	60	2.12027e-09
1652	1.26854e-12	5.43897	60	2.11857e-09
1654	1.26752e-12	5.43897	60	2.11687e-09
1656	1.2665e-12	5.43897	60	2.11517e-09
1658	1.26548e-12	5.43897	60	2.11347e-09
1660	1.26446e-12	5.43897	60	2.11177e-09
1662	1.26345e-12	5.43897	60	2.11007e-09
1664	1.26243e-12	5.43897	60	2.10837e-09
1666	1.26141e-12	5.43897	60	2.10667e-09
1668	1.26039e-12	5.43897	60	2.10497e-09
1670	1.25937e-12	5.43897	60	2.10326e-09
1672	1.25836e-12	5.43897	60	2.10156e-09
1674	1.25734e-12	5.43897	60	2.09986e-09
1676	1.25632e-12	5.43897	60	2.09816e-09
1678	1.2553e-12	5.43897	60	2.09646e-09
1680	1.25428e-12	5.43897	60	2.09476e-09
1682	1.25326e-12	5.43897	60	2.09306e-09
1684	1.25225e-12	5.43897	60	2.09136e-09
1686	1.25123e-12	5.43897	60	2.08966e-09
1688	1.25021e-12	5.43897	60	2.08796e-09
1690	1.24919e-12	5.43897	60	2.08626e-09
1692	1.24817e-12	5.43897	60	2.08456e-09
1694	1.24716e-12	5.43897	60	2.08286e-09
1696	1.24614e-12	5.43897	60	2.08116e-09
1698	1.24512e-12	5.43897	60	2.07946e-09
1700	1.2441e-12	5.43897	60	2.07776e-09
1702	1.24308e-12	5.43897	60	2.07606e-09
1704	1.24207e-12	5.43897	60	2.07436e-09
1706	1.24105e-12	5.43897	60	2.07266e-09
1708	1.24003e-12	5.43897	60	2.07096e-09
1710	1.23901e-12	5.43897	60	2.06926e-09
1712	1.23799e-12	5.43897	60	2.06756e-09
1714	1.23697e-12	5.43897	60	2.06586e-09
1716	1.23596e-12	5.43897	60	2.06416e-09
1718	1.23494e-12	5.43897	60	2.06246e-09
1720	1.23392e-12	5.43897	60	2.06076e-09
1722	1.2329e-12	5.43897	60	2.05905e-09
1724	1.23188e-12	5.43897	60	2.05735e-09
1726	1.23087e-12	5.43897	60	2.05565e-09
1728	1.22985e-12	5.43897	60	2.05395e-09
1730	1.22883e-12	5.43897	60	2.05225e-09
1732	1.22781e-12	5.43897	60	2.05055e-09
1734	1.22679e-12	5.43897	60	2.04885e-09
1736	1.22578e-12	5.43897	60	2.04715e-09
1738	1.22476e-12	5.43897	60	2.04545e-09
1740	1.22374e-12	5.43897	60	2.04375e-09
1742	1.22272e-12	5.43897	60	2.04205e-09
1744	1.2217e-12	5.43897	60	2.04035e-09
1746	1.22068e-12	5.43897	60	2.03865e-09
1748	1.21967e-12	5.43897	60	2.03695e-09
1750	1.21865e-12	5.43897	60	2.03525e-09
1752	1.21763e-12	5.43897	60	2.03355e-09
1754	1.21661e-12	5.43897	60	2.03185e-09
1756	1.21559e-12	5.43897	60	2.03015e-09
1758	1.21458e-12	5.43897	60	2.02845e-09
1760	1.21356e-12	5.43897	60	2.02675e-09
1762	1.21254e-12	5.43897	60	2.02505e-09
1764	1.21152e-12	5.43897	60	2.02335e-09
1766	1.2105e-12	5.43897	60	2.02165e-09
1768	1.20948e-12	5.43897	60	2.01995e-09
1770	1.20847e-12	5.43897	60	2.01825e-09
1772	1.20745e-12	5.43897	60	2.01655e-09
1774	1.20643e-12	5.43897	60	2.01484e-09
1776	1.20541e-12	5.43897	60	2.01314e-09
1778	1.20439e-12	5.43897	60	2.01144e-09
1780	1.20338e-12	5.43897	60	2.00974e-09
1782	1.20236e-12	5.43897	60	2.00804e-09
1784	1.20134e-12	5.43897	60	2.00634e-09
1786	1.20032e-12	5.43897	60	2.00464e-09
1788	1.1993e-12	5.43897	60	2.00294e-09
1790	1.19829e-12	5.43897	60	2.00124e-09
1792	1.19727e-12	5.43897	60	1.99954e-09
1794	1.19625e-12	5.43897	60	1.99784e-09
1796	1.19523e-12	5.43897	60	1.99614e-09
1798	1.19421e-12	5.43897	60	1.99444e-09
1800	1.19319e-12	5.43897	60	1.99274e-09
1802	1.19218e-12	5.43897	60	1.99104e-09
1804	1.19116e-12	5.43897	60	1.98934e-09
1806	1.19014e-12	5.43897	60	1.98764e-09
1808	1.18912e-12	5.43897	60	1.98594e-09
1810	1.1881e-12	5.43897	60	1.98424e-09
1812	1.18709e-12	5.43897	60	1.98254e-09
1814	1.18607e-12	5.43897	60	1.98084e-09
1816	1.18505e-12	5.43897	60	1.97914e-09
1818	1.18403e-12	5.43897	60	1.97744e-09
1820	1.18301e-12	5.43897	60	1.97574e-09
1822	1.182e-12	5.43897	60	1.97404e-09
1824	1.18098e-12	5.43897	60	1.97234e-09
1826	1.17996e-12	5.43897	60	1.97064e-09
1828	1.17894e-12	5.43897	60	1.96893e-09
1830	1.17792e-12	5.43897	60	1.96723e-09
1832	1.1769e-12	5.43897	60	1.96553e-09
1834	1.17589e-12	5.43897	60	1.96383e-09
1836	1.17487e-12	5.43897	60	1.96213e-09
1838	1.17385e-12	5.43897	60	1.96043e-09
1840	1.17283e-12	5.43897	60	1.95873e-09
1842	1.17181e-12	5.43897	60	1.95703e-09
1844	1.1708e-12	5.43897	60	1.95533e-09
1846	1.16978e-12	5.43897	60	1.95363e-09
1848	1.16876e-12	5.43897	60	1.95193e-09
1850	1.16774e-12	5.43897	60	1.95023e-09
1852	1.16672e-12	5.43897	60	1.94853e-09
1854	1.16571e-12	5.43897	60	1.94683e-09
1856	1.16469e-12	5.43897	60	1.94513e-09
1858	1.16367e-12	5.43897	60	1.94343e-09
1860	1.16265e-12	5.43897	60	1.94173e-09
1862	1.16163e-12	5.43897	60	1.94003e-09
1864	1.16061e-12	5.43897	60	1.93833e-09
1866	1.1596e-12	5.43897	60	1.93663e-09
1868	1.15858e-12	5.43897	60	1.93493e-09
1870	1.15756e-12	5.43897	60	1.93323e-09
1872	1.15654e-12	5.43897	60	1.93153e-09
1874	1.15552e-12	5.43897	60	1.92983e-09
1876	1.15451e-12	5.43897	60	1.92813e-09
1878	1.15349e-12	5.43897	60	1.92643e-09
1880	1.15247e-12	5.43897	60	1.92472e-09
1882	1.15145e-12	5.43897	60	1.92302e-09
1884	1.15043e-12	5.43897	60	1.92132e-09
1886	1.14941e-12	5.43897	60	1.91962e-09
1888	1.1484e-12	5.43897	60	1.91792e-09
1890	1.14738e-12	5.43897	60	1.91622e-09
1892	1.14636e-12	5.43897	60	1.91452e-09
1894	1.14534e-12	5.43897	60	1.91282e-09
1896	1.14432e-12	5.43897	60	1.91112e-09
1898	1.14331e-12	5.43897	60	1.90942e-09
1900	1.14229e-12	5.43897	60	1.90772e-09
1902	1.14127e-12	5.43897	60	1.90602e-09
1904	1.14025e-12	5.43897	60	1.90432e-09
1906	1.13923e-12	5.43897	60	1.90262e-09
1908	1.13822e-12	5.43897	60	1.90092e-09
1910	1.1372e-12	5.43897	60	1.89922e-09
1912	1.13618e-12	5.43897	60	1.89752e-09
1914	1.13516e-12	5.43897	60	1.89582e-09
1916	1.13414e-12	5.43897	60	1.89412e-09
1918	1.13312e-12	5.43897	60	1.89242e-09
1920	1.13211e-12	5.43897	60	1.89072e-09
1922	1.13109e-12	5.43897	60	1.88902e-09
1924	1.13007e-12	5.43897	60	1.88732e-09
1926	1.12905e-12	5.43897	60	1.88562e-09
1928	1.12803e-12	5.43897	60	1.88392e-09
1930	1.12702e-12	5.43897	60	1.88222e-09
1932	1.126e-12	5.43897	60	1.88052e-09
1934	1.12498e-12	5.43897	60	1.87881e-09
1936	1.12396e-12	5.43897	60	1.87711e-09
1938	1.12294e-12	5.43897	60	1.87541e-09
1940	1.12193e-12	5.43897	60	1.87371e-09
1942	1.12091e-12	5.43897	60	1.87201e-09
1944	1.11989e-12	5.43897	60	1.87031e-09
1946	1.11887e-12	5.43897	60	1.86861e-09
1948	1.11785e-12	5.43897	60	1.86691e-09
1950	1.11683e-12	5.43897	60	1.86521e-09
1952	1.11582e-12	5.43897	60	1.86351e-09
1954	1.1148e-12	5.43897	60	1.86181e-09
1956	1.11378e-12	5.43897	60	1.86011e-09
1958	1.11276e-12	5.43897	60	1.85841e-09
1960	1.11174e-12	5.43897	60	1.85671e-09
1962	1.11073e-12	5.43897	60	1.85501e-09
1964	1.10971e-12	5.43897	60	1.85331e-09
1966	1.10869e-12	5.43897	60	1.85161e-09
1968	1.10767e-12	5.43897	60	1.84991e-09
1970	1.10665e-12	5.43897	60	1.84821e-09
1972	1.10563e-12	5.43897	60	1.84651e-09
1974	1.10462e-12	5.43897	60	1.84481e-09
1976	1.1036e-12	5.43897	60	1.84311e-09
1978	1.10258e-12	5.43897	60	1.84141e-09
1980	1.10156e-12	5.43897	60	1.83971e-09
1982	1.10054e-12	5.43897	60	1.83801e-09
1984	1.09953e-12	5.43897	60	1.83631e-09
1986	1.09851e-12	5.43897	60	1.8346e-09
1988	1.09749e-12	5.43897	60	1.8329e-09
1990	1.09647e-12	5.43897	60	1.8312e-09
1992	1.09545e-12	5.43897	60	1.8295e-09
1994	1.09444e-12	5.43897	60	1.8278e-09
1996	1.09342e-12	5.43897	60	1.8261e-09
1998	1.0924e-12	5.43897	60	1.8244e-09
2000	1.09138e-12	5.43897	60	1.8227e-09
2002	1.09036e-12	5.43897	60	1.821e-09
2004	1.08934e-12	5.43897	60	1.8193e-09
2006	1.08833e-12	5.43897	60	1.8176e-09
2008	1.08731e-12	5.43897	60	1.8159e-09
2010	1.08629e-12	5.43897	60	1.8142e-09
2012	1.08527e-12	5.43897	60	1.8125e-09
2014	1.08425e-12	5.43897	60	1.8108e-09
2016	1.08324e-12	5.43897	60	1.8091e-09
2018	1.08222e-12	5.43897	60	1.8074e-09
2020	1.0812e-12	5.43897	60	1.8057e-09
2022	1.08018e-12	5.43897	60	1.804e-09
2024	1.07916e-12	5.43897	60	1.8023e-09
2026	1.07815e-12	5.43897	60	1.8006e-09
2028	1.07713e-12	5.43897	60	1.7989e-09
2030	1.07611e-12	5.43897	60	1.7972e-09
2032	1.07509e-12	5.43897	60	1.7955e-09
2034	1.07407e-12	5.43897	60	1.7938e-09
2036	1.07305e-12	5.43897	60	1.7921e-09
2038	1.07204e-12	5.43897	60	1.79039e-09
2040	1.07102e-12	5.43897	60	1.78869e-09
2042	1.07e-12	5.43897	60	1.78699e-09
2044	1.06898e-12	5.43897	60	1.78529e-09
2046	1.06796e-12	5.43897	60	1.78359e-09
2048	1.06695e-12	5.43897	60	1.78189e-09
2050	1.06593e-12	5.43897	60	1.78019e-09
2052	1.06491e-12	5.43897	60	1.77849e-09
2054	1.06389e-12	5.43897	60	1.77679e-09
2056	1.06287e-12	5.43897	60	1.77509e-09
2058	1.06185e-12	5.43897	60	1.77339e-09
2060	1.06084e-12	5.43897	60	1.77169e-09
2062	1.05982e-12	5.43897	60	1.76999e-09
2064	1.0588e-12	5.43897	60	1.76829e-09
2066	1.05778e-12	5.43897	60	1.76659e-09
2068	1.05676e-12	5.43897	60	1.76489e-09
2070	1.05575e-12	5.43897	60	1.76319e-09
2072	1.05473e-12	5.43897	60	1.76149e-09
2074	1.05371e-12	5.43897	60	1.75979e-09
2076	1.05269e-12	5.43897	60	1.75809e-09
2078	1.05167e-12	5.43897	60	1.75639e-09
2080	1.05066e-12	5.43897	60	1.75469e-09
2082	1.04964e-12	5.43897	60	1.75299e-09
2084	1.04862e-12	5.43897	60	1.75129e-09
2086	1.0476e-12	5.43897	60	1.74959e-09
2088	1.04658e-12	5.43897	60	1.74789e-09
2090	1.04556e-12	5.43897	60	1.74619e-09
2092	1.04455e-12	5.43897	60	1.74448e-09
2094	1.04353e-12	5.43897	60	1.74278e-09
2096	1.04251e-12	5.43897	60	1.74108e-09
2098	1.04149e-12	5.43897	60	1.73938e-09
2100	1.04047e-12	5.43897	60	1.73768e-09
2102	1.03946e-12	5.43897	60	1.73598e-09
2104	1.03844e-12	5.43897	60	1.73428e-09
2106	1.03742e-12	5.43897	60	1.73258e-09
2108	1.0364e-12	5.43897	60	1.73088e-09
2110	1.03538e-12	5.43897	60	1.72918e-09
2112	1.03437e-12	5.43897	60	1.72748e-09
2114	1.03335e-12	5.43897	60	1.72578e-09
2116	1.03233e-12	5.43897	60	1.72408e-09
2118	1.03131e-12	5.43897	60	1.72238e-09
2120	1.03029e-12	5.43897	60	1.72068e-09
2122	1.02927e-12	5.43897	60	1.71898e-09
2124	1.02826e-12	5.43897	60	1.71728e-09
2126	1.02724e-12	5.43897	60	1.71558e-09
2128	1.02622e-12	5.43897	60	1.71388e-09
2130	1.0252e-12	5.43897	60	1.71218e-09
2132	1.02418e-12	5.43897	60	1.71048e-09
2134	1.02317e-12	5.43897	60	1.70878e-09
2136	1.02215e-12	5.43897	60	1.70708e-09
2138	1.02113e-12	5.43897	60	1.70538e-09
2140	1.02011e-12	5.43897	60	1.70368e-09
2142	1.01909e-12	5.43897	60	1.70198e-09
2144	1.01808e-12	5.43897	60	1.70027e-09
2146	1.01706e-12	5.43897	60	1.69857e-09
2148	1.01604e-12	5.43897	60	1.69687e-09
2150	1.01502e-12	5.43897	60	1.69517e-09
2152	1.014e-12	5.43897	60	1.69347e-09
2154	1.01298e-12	5.43897	60	1.69177e-09
2156	1.01197e-12	5.43897	60	1.69007e-09
2158	1.01095e-12	5.43897	60	1.68837e-09
2160	1.00993e-12	5.43897	60	1.68667e-09
2162	1.00891e-12	5.43897	60	1.68497e-09
2164	1.00789e-12	5.43897	60	1.68327e-09
2166	1.00688e-12	5.43897	60	1.68157e-09
2168	1.00586e-12	5.43897	60	1.67987e-09
2170	1.00484e-12	5.43897	60	1.67817e-09
2172	1.00382e-12	5.43897	60	1.67647e-09
2174	1.0028e-12	5.43897	60	1.67477e-09
2176	1.00178e-12	5.43897	60	1.67307e-09
2178	1.00077e-12	5.43897	60	1.67137e-09
2180	9.99749e-13	5.43897	60	1.66967e-09
2182	9.9873e-13	5.43897	60	1.66797e-09
2184	9.97712e-13	5.43897	60	1.66627e-09
2186	9.96694e-13	5.43897	60	1.66457e-09
2188	9.95676e-13	5.43897	60	1.66287e-09
2190	9.94658e-13	5.43897	60	1.66117e-09
2192	9.9364e-13	5.43897	60	1.65947e-09
2194	9.92622e-13	5.43897	60	1.65777e-09
2196	9.91604e-13	5.43897	60	1.65607e-09
2198	9.90585e-13	5.43897	60	1.65436e-09
2200	9.89567e-13	5.43897	60	1.65266e-09
2202	9.88549e-13	5.43897	60	1.65096e-09
2204	9.87531e-13	5.43897	60	1.64926e-09
2206	9.86513e-13	5.43897	60	1.64756e-09
2208	9.85495e-13	5.43897	60	1.64586e-09
2210	9.84477e-13	5.43897	60	1.64416e-09
2212	9.83458e-13	5.43897	60	1.64246e-09
2214	9.8244e-13	5.43897	60	1.64076e-09
2216	9.81422e-13	5.43897	60	1.63906e-09
2218	9.80404e-13	5.43897	60	1.63736e-09
2220	9.79386e-13	5.43897	60	1.63566e-09
2222	9.78368e-13	5.43897	60	1.63396e-09
2224	9.7735e-13	5.43897	60	1.63226e-09
2226	9.76331e-13	5.43897	60	1.63056e-09
2228	9.75313e-13	5.43897	60	1.62886e-09
2230	9.74295e-13	5.43897	60	1.62716e-09
2232	9.73277e-13	5.43897	60	1.62546e-09
2234	9.72259e-13	5.43897	60	1.62376e-09
2236	9.71241e-13	5.43897	60	1.62206e-09
2238	9.70223e-13	5.43897	60	1.62036e-09
2240	9.69204e-13	5.43897	60	1.61866e-09
2242	9.68186e-13	5.43897	60	1.61696e-09
2244	9.67168e-13	5.43897	60	1.61526e-09
2246	9.6615e-13	5.43897	60	1.61356e-09
2248	9.65132e-13	5.43897	60	1.61186e-09
2250	9.64114e-13	5.43897	60	1.61015e-09
2252	9.63096e-13	5.43897	60	1.60845e-09
2254	9.62078e-13	5.43897	60	1.60675e-09
2256	9.61059e-13	5.43897	60	1.60505e-09
2258	9.60041e-13	5.43897	60	1.60335e-09
2260	9.59023e-13	5.43897	60	1.60165e-09
2262	9.58005e-13	5.43897	60	1.59995e-09
2264	9.56987e-13	5.43897	60	1.59825e-09
2266	9.55969e-13	5.43897	60	1.59655e-09
2268	9.54951e-13	5.43897	60	1.59485e-09
2270	9.53932e-13	5.43897	60	1.59315e-09
2272	9.52914e-13	5.43897	60	1.59145e-09
2274	9.51896e-13	5.43897	60	1.58975e-09
2276	9.50878e-13	5.43897	60	1.58805e-09
2278	9.4986e-13	5.43897	60	1.58635e-09
2280	9.48842e-13	5.43897	60	1.58465e-09
2282	9.47824e-13	5.43897	60	1.58295e-09
2284	9.46805e-13	5.43897	60	1.58125e-09
2286	9.45787e-13	5.43897	60	1.57955e-09
2288	9.44769e-13	5.43897	60	1.57785e-09
2290	9.43751e-13	5.43897	60	1.57615e-09
2292	9.42733e-13	5.43897	60	1.57445e-09
2294	9.41715e-13	5.43897	60	1.57275e-09
2296	9.40697e-13	5.43897	60	1.57105e-09
2298	9.39679e-13	5.43897	60	1.56935e-09
2300	9.3866e-13	5.43897	60	1.56765e-09
2302	9.37642e-13	5.43897	60	1.56594e-09
2304	9.36624e-13	5.43897	60	1.56424e-09
2306	9.35606e-13	5.43897	60	1.56254e-09
2308	9.34588e-13	5.43897	60	1.56084e-09
2310	9.3357e-13	5.43897	60	1.55914e-09
2312	9.32552e-13	5.43897	60	1.55744e-09
2314	9.31533e-13	5.43897	60	1.55574e-09
2316	9.30515e-13	5.43897	60	1.55404e-09
2318	9.29497e-13	5.43897	60	1.55234e-09
2320	9.28479e-13	5.43897	60	1.55064e-09
2322	9.27461e-13	5.43897	60	1.54894e-09
2324	9.26443e-13	5.43897	60	1.54724e-09
2326	9.25425e-13	5.43897	60	1.54554e-09
2328	9.24406e-13	5.43897	60	1.54384e-09
2330	9.23388e-13	5.43897	60	1.54214e-09
2332	9.2237e-13	5.43897	60	1.54044e-09
2334	9.21352e-13	5.43897	60	1.53874e-09
2336	9.20334e-13	5.43897	60	1.53704e-09
2338	9.19316e-13	5.43897	60	1.53534e-09
2340	9.18298e-13	5.43897	60	1.53364e-09
2342	9.17279e-13	5.43897	60	1.53194e-09
2344	9.16261e-13	5.43897	60	1.53024e-09
2346	9.15243e-13	5.43897	60	1.52854e-09
2348	9.14225e-13	5.43897	60	1.52684e-09
2350	9.13207e-13	5.43897	60	1.52514e-09
2352	9.12189e-13	5.43897	60	1.52344e-09
2354	9.11171e-13	5.43897	60	1.52174e-09
2356	9.10153e-13	5.43897	60	1.52003e-09
2358	9.09134e-13	5.43897	60	1.51833e-09
2360	9.08116e-13	5.43897	60	1.51663e-09
2362	9.07098e-13	5.43897	60	1.51493e-09
2364	9.0608e-13	5.43897	60	1.51323e-09
2366	9.05062e-13	5.43897	60	1.51153e-09
2368	9.04044e-13	5.43897	60	1.50983e-09
2370	9.03026e-13	5.43897	60	1.50813e-09
2372	9.02007e-13	5.43897	60	1.50643e-09
2374	9.00989e-13	5.43897	60	1.50473e-09
2376	8.99971e-13	5.43897	60	1.50303e-09
2378	8.98953e-13	5.43897	60	1.50133e-09
2380	8.97935e-13	5.43897	60	1.49963e-09
2382	8.96917e-13	5.43897	60	1.49793e-09
2384	8.95899e-13	5.43897	60	1.49623e-09
2386	8.9488e-13	5.43897	60	1.49453e-09
2388	8.93862e-13	5.43897	60	1.49283e-09
2390	8.92844e-13	5.43897	60	1.49113e-09
2392	8.91826e-13	5.43897	60	1.48943e-09
2394	8.90808e-13	5.43897	60	1.48773e-09
2396	8.8979e-13	5.43897	60	1.48603e-09
2398	8.88772e-13	5.43897	60	1.48433e-09
2400	8.87754e-13	5.43897	60	1.48263e-09
2402	8.86735e-13	5.43897	60	1.48093e-09
2404	8.85717e-13	5.43897	60	1.47923e-09
2406	8.84699e-13	5.43897	60	1.47753e-09
2408	8.83681e-13	5.43897	60	1.47582e-09
2410	8.82663e-13	5.43897	60	1.47412e-09
2412	8.81645e-13	5.43897	60	1.47242e-09
2414	8.80627e-13	5.43897	60	1.47072e-09
2416	8.79608e-13	5.43897	60	1.46902e-09
2418	8.7859e-13	5.43897	60	1.46732e-09
2420	8.77572e-13	5.43897	60	1.46562e-09
2422	8.76554e-13	5.43897	60	1.46392e-09
2424	8.75536e-13	5.43897	60	1.46222e-09
2426	8.74518e-13	5.43897	60	1.46052e-09
2428	8.735e-13	5.43897	60	1.45882e-09
2430	8.72481e-13	5.43897	60	1.45712e-09
2432	8.71463e-13	5.43897	60	1.45542e-09
2434	8.70445e-13	5.43897	60	1.45372e-09
2436	8.69427e-13	5.43897	60	1.45202e-09
2438	8.68409e-13	5.43897	60	1.45032e-09
2440	8.67391e-13	5.43897	60	1.44862e-09
2442	8.66373e-13	5.43897	60	1.44692e-09
2444	8.65354e-13	5.43897	60	1.44522e-09
2446	8.64336e-13	5.43897	60	1.44352e-09
2448	8.63318e-13	5.43897	60	1.44182e-09
2450	8.623e-13	5.43897	60	1.44012e-09
2452	8.61282e-13	5.43897	60	1.43842e-09
2454	8.60264e-13	5.43897	60	1.43672e-09
2456	8.59246e-13	5.43897	60	1.43502e-09
2458	8.58228e-13	5.43897	60	1.43332e-09
2460	8.57209e-13	5.43897	60	1.43162e-09
2462	8.56191e-13	5.43897	60	1.42991e-09
2464	8.55173e-13	5.43897	60	1.42821e-09
2466	8.54155e-13	5.43897	60	1.42651e-09
2468	8.53137e-13	5.43897	60	1.42481e-09
2470	8.52119e-13	5.43897	60	1.42311e-09
2472	8.51101e-13	5.43897	60	1.42141e-09
2474	8.50082e-13	5.43897	60	1.41971e-09
2476	8.49064e-13	5.43897	60	1.41801e-09
2478	8.48046e-13	5.43897	60	1.41631e-09
2480	8.47028e-13	5.43897	60	1.41461e-09
2482	8.4601e-13	5.43897	60	1.41291e-09
2484	8.44992e-13	5.43897	60	1.41121e-09
2486	8.43974e-13	5.43897	60	1.40951e-09
2488	8.42955e-13	5.43897	60	1.40781e-09
2490	8.41937e-13	5.43897	60	1.40611e-09
2492	8.40919e-13	5.43897	60	1.40441e-09
2494	8.39901e-13	5.43897	60	1.40271e-09
2496	8.38883e-13	5.43897	60	1.40101e-09
2498	8.37865e-13	5.43897	60	1.39931e-09
2500	8.36847e-13	5.43897	60	1.39761e-09
2502	8.35829e-13	5.43897	60	1.39591e-09
2504	8.3481e-13	5.43897	60	1.39421e-09
2506	8.33792e-13	5.43897	60	1.39251e-09
2508	8.32774e-13	5.43897	60	1.39081e-09
2510	8.31756e-13	5.43897	60	1.38911e-09
2512	8.30738e-13	5.43897	60	1.38741e-09
2514	8.2972e-13	5.43897	60	1.3857e-09
2516	8.28702e-13	5.43897	60	1.384e-09
2518	8.27683e-13	5.43897	60	1.3823e-09
2520	8.26665e-13	5.43897	60	1.3806e-09
2522	8.25647e-13	5.43897	60	1.3789e-09
2524	8.24629e-13	5.43897	60	1.3772e-09
2526	8.23611e-13	5.43897	60	1.3755e-09
2528	8.22593e-13	5.43897	60	1.3738e-09
2530	8.21575e-13	5.43897	60	1.3721e-09
2532	8.20556e-13	5.43897	60	1.3704e-09
2534	8.19538e-13	5.43897	60	1.3687e-09
2536	8.1852e-13	5.43897	60	1.367e-09
2538	8.17502e-13	5.43897	60	1.3653e-09
2540	8.16484e-13	5.43897	60	1.3636e-09
2542	8.15466e-13	5.43897	60	1.3619e-09
2544	8.14448e-13	5.43897	60	1.3602e-09
2546	8.13429e-13	5.43897	60	1.3585e-09
2548	8.12411e-13	5.43897	60	1.3568e-09
2550	8.11393e-13	5.43897	60	1.3551e-09
2552	8.10375e-13	5.43897	60	1.3534e-09
2554	8.09357e-13	5.43897	60	1.3517e-09
2556	8.08339e-13	5.43897	60	1.35e-09
2558	8.07321e-13	5.43897	60	1.3483e-09
2560	8.06303e-13	5.43897	60	1.3466e-09
2562	8.05284e-13	5.43897	60	1.3449e-09
2564	8.04266e-13	5.43897	60	1.3432e-09
2566	8.03248e-13	5.43897	60	1.34149e-09
2568	8.0223e-13	5.43897	60	1.33979e-09
2570	8.01212e-13	5.43897	60	1.33809e-09
2572	8.00194e-13	5.43897	60	1.33639e-09
2574	7.99176e-13	5.43897	60	1.33469e-09
2576	7.98157e-13	5.43897	60	1.33299e-09
2578	7.97139e-13	5.43897	60	1.33129e-09
2580	7.96121e-13	5.43897	60	1.32959e-09
2582	7.95103e-13	5.43897	60	1.32789e-09
2584	7.94085e-13	5.43897	60	1.32619e-09
2586	7.93067e-13	5.43897	60	1.32449e-09
2588	7.92049e-13	5.43897	60	1.32279e-09
2590	7.9103e-13	5.43897	60	1.32109e-09
2592	7.90012e-13	5.43897	60	1.31939e-09
2594	7.88994e-13	5.43897	60	1.31769e-09
2596	7.87976e-13	5.43897	60	1.31599e-09
2598	7.86958e-13	5.43897	60	1.31429e-09
2600	7.8594e-13	5.43897	60	1.31259e-09
2602	7.84922e-13	5.43897	60	1.31089e-09
2604	7.83903e-13	5.43897	60	1.30919e-09
2606	7.82885e-13	5.43897	60	1.30749e-09
2608	7.81867e-13	5.43897	60	1.30579e-09
2610	7.80849e-13	5.43897	60	1.30409e-09
2612	7.79831e-13	5.43897	60	1.30239e-09
2614	7.78813e-13	5.43897	60	1.30069e-09
2616	7.77795e-13	5.43897	60	1.29899e-09
2618	7.76777e-13	5.43897	60	1.29729e-09
2620	7.75758e-13	5.43897	60	1.29558e-09
2622	7.7474e-13	5.43897	60	1.29388e-09
2624	7.73722e-13	5.43897	60	1.29218e-09
2626	7.72704e-13	5.43897	60	1.29048e-09
2628	7.71686e-13	5.43897	60	1.28878e-09
2630	7.70668e-13	5.43897	60	1.28708e-09
2632	7.6965e-13	5.43897	60	1.28538e-09
2634	7.68631e-13	5.43897	60	1.28368e-09
2636	7.67613e-13	5.43897	60	1.28198e-09
2638	7.66595e-13	5.43897	60	1.28028e-09
2640	7.65577e-13	5.43897	60	1.27858e-09
2642	7.64559e-13	5.43897	60	1.27688e-09
2644	7.63541e-13	5.43897	60	1.27518e-09
2646	7.62523e-13	5.43897	60	1.27348e-09
2648	7.61504e-13	5.43897	60	1.27178e-09
2650	7.60486e-13	5.43897	60	1.27008e-09
2652	7.59468e-13	5.43897	60	1.26838e-09
2654	7.5845e-13	5.43897	60	1.26668e-09
2656	7.57432e-13	5.43897	60	1.26498e-09
2658	7.56414e-13	5.43897	60	1.26328e-09
2660	7.55396e-13	5.43897	60	1.26158e-09
2662	7.54378e-13	5.43897	60	1.25988e-09
2664	7.53359e-13	5.43897	60	1.25818e-09
2666	7.52341e-13	5.43897	60	1.25648e-09
2668	7.51323e-13	5.43897	60	1.25478e-09
2670	7.50305e-13	5.43897	60	1.25308e-09
2672	7.49287e-13	5.43897	60	1.25137e-09
2674	7.48269e-13	5.43897	60	1.24967e-09
2676	7.47251e-13	5.43897	60	1.24797e-09
2678	7.46232e-13	5.43897	60	1.24627e-09
2680	7.45214e-13	5.43897	60	1.24457e-09
2682	7.44196e-13	5.43897	60	1.24287e-09
2684	7.43178e-13	5.43897	60	1.24117e-09
2686	7.4216e-13	5.43897	60	1.23947e-09
2688	7.41142e-13	5.43897	60	1.23777e-09
2690	7.40124e-13	5.43897	60	1.23607e-09
2692	7.39105e-13	5.43897	60	1.23437e-09
2694	7.38087e-13	5.43897	60	1.23267e-09
2696	7.37069e-13	5.43897	60	1.23097e-09
2698	7.36051e-13	5.43897	60	1.22927e-09
2700	7.35033e-13	5.43897	60	1.22757e-09
2702	7.34015e-13	5.43897	60	1.22587e-09
2704	7.32997e-13	5.43897	60	1.22417e-09
2706	7.31978e-13	5.43897	60	1.22247e-09
2708	7.3096e-13	5.43897	60	1.22077e-09
2710	7.29942e-13	5.43897	60	1.21907e-09
2712	7.28924e-13	5.43897	60	1.21737e-09
2714	7.27906e-13	5.43897	60	1.21567e-09
2716	7.26888e-13	5.43897	60	1.21397e-09
2718	7.2587e-13	5.43897	60	1.21227e-09
2720	7.24852e-13	5.43897	60	1.21057e-09
2722	7.23833e-13	5.43897	60	1.20887e-09
2724	7.22815e-13	5.43897	60	1.20716e-09
2726	7.21797e-13	5.43897	60	1.20546e-09
2728	7.20779e-13	5.43897	60	1.20376e-09
2730	7.19761e-13	5.43897	60	1.20206e-09
2732	7.18743e-13	5.43897	60	1.20036e-09
2734	7.17725e-13	5.43897	60	1.19866e-09
2736	7.16706e-13	5.43897	60	1.19696e-09
2738	7.15688e-13	5.43897	60	1.19526e-09
2740	7.1467e-13	5.43897	60	1.19356e-09
2742	7.13652e-13	5.43897	60	1.19186e-09
2744	7.12634e-13	5.43897	60	1.19016e-09
2746	7.11616e-13	5.43897	60	1.18846e-09
2748	7.10598e-13	5.43897	60	1.18676e-09
2750	7.09579e-13	5.43897	60	1.18506e-09
2752	7.08561e-13	5.43897	60	1.18336e-09
2754	7.07543e-13	5.43897	60	1.18166e-09
2756	7.06525e-13	5.43897	60	1.17996e-09
2758	7.05507e-13	5.43897	60	1.17826e-09
2760	7.04489e-13	5.43897	60	1.17656e-09
2762	7.03471e-13	5.43897	60	1.17486e-09
2764	7.02453e-13	5.43897	60	1.17316e-09
2766	7.01434e-13	5.43897	60	1.17146e-09
2768	7.00416e-13	5.43897	60	1.16976e-09
2770	6.99398e-13	5.43897	60	1.16806e-09
2772	6.9838e-13	5.43897	60	1.16636e-09
2774	6.97362e-13	5.43897	60	1.16466e-09
2776	6.96344e-13	5.43897	60	1.16296e-09
2778	6.95326e-13	5.43897	60	1.16125e-09
2780	6.94307e-13	5.43897	60	1.15955e-09
2782	6.93289e-13	5.43897	60	1.15785e-09
2784	6.92271e-13	5.43897	60	1.15615e-09
2786	6.91253e-13	5.43897	60	1.15445e-09
2788	6.90235e-13	5.43897	60	1.15275e-09
2790	6.89217e-13	5.43897	60	1.15105e-09
2792	6.88199e-13	5.43897	60	1.14935e-09
2794	6.8718e-13	5.43897	60	1.14765e-09
2796	6.86162e-13	5.43897	60	1.14595e-09
2798	6.85144e-13	5.43897	60	1.14425e-09
2800	6.84126e-13	5.43897	60	1.14255e-09
2802	6.83108e-13	5.43897	60	1.14085e-09
2804	6.8209e-13	5.43897	60	1.13915e-09
2806	6.81072e-13	5.43897	60	1.13745e-09
2808	6.80053e-13	5.43897	60	1.13575e-09
2810	6.79035e-13	5.43897	60	1.13405e-09
2812	6.78017e-13	5.43897	60	1.13235e-09
2814	6.76999e-13	5.43897	60	1.13065e-09
2816	6.75981e-13	5.43897	60	1.12895e-09
2818	6.74963e-13	5.43897	60	1.12725e-09
2820	6.73945e-13	5.43897	60	1.12555e-09
2822	6.72927e-13	5.43897	60	1.12385e-09
2824	6.71908e-13	5.43897	60	1.12215e-09
2826	6.7089e-13	5.43897	60	1.12045e-09
2828	6.69872e-13	5.43897	60	1.11875e-09
2830	6.68854e-13	5.43897	60	1.11704e-09
2832	6.67836e-13	5.43897	60	1.11534e-09
2834	6.66818e-13	5.43897	60	1.11364e-09
2836	6.658e-13	5.43897	60	1.11194e-09
2838	6.64781e-13	5.43897	60	1.11024e-09
2840	6.63763e-13	5.43897	60	1.10854e-09
2842	6.62745e-13	5.43897	60	1.10684e-09
2844	6.61727e-13	5.43897	60	1.10514e-09
2846	6.60709e-13	5.43897	60	1.10344e-09
2848	6.59691e-13	5.43897	60	1.10174e-09
2850	6.58673e-13	5.43897	60	1.10004e-09
2852	6.57654e-13	5.43897	60	1.09834e-09
2854	6.56636e-13	5.43897	60	1.09664e-09
2856	6.55618e-13	5.43897	60	1.09494e-09
2858	6.546e-13	5.43897	60	1.09324e-09
2860	6.53582e-13	5.43897	60	1.09154e-09
2862	6.52564e-13	5.43897	60	1.08984e-09
2864	6.51546e-13	5.43897	60	1.08814e-09
2866	6.50528e-13	5.43897	60	1.08644e-09
2868	6.49509e-13	5.43897	60	1.08474e-09
2870	6.48491e-13	5.43897	60	1.08304e-09
2872	6.47473e-13	5.43897	60	1.08134e-09
2874	6.46455e-13	5.43897	60	1.07964e-09
2876	6.45437e-13	5.43897	60	1.07794e-09
2878	6.44419e-13	5.43897	60	1.07624e-09
2880	6.43401e-13	5.43897	60	1.07454e-09
2882	6.42382e-13	5.43897	60	1.07284e-09
2884	6.41364e-13	5.43897	60	1.07113e-09
2886	6.40346e-13	5.43897	60	1.06943e-09
2888	6.39328e-13	5.43897	60	1.06773e-09
2890	6.3831e-13	5.43897	60	1.06603e-09
2892	6.37292e-13	5.43897	60	1.06433e-09
2894	6.36274e-13	5.43897	60	1.06263e-09
2896	6.35255e-13	5.43897	60	1.06093e-09
2898	6.34237e-13	5.43897	60	1.05923e-09
2900	6.33219e-13	5.43897	60	1.05753e-09
2902	6.32201e-13	5.43897	60	1.05583e-09
2904	6.31183e-13	5.43897	60	1.05413e-09
2906	6.30165e-13	5.43897	60	1.05243e-09
2908	6.29147e-13	5.43897	60	1.05073e-09
2910	6.28128e-13	5.43897	60	1.04903e-09
2912	6.2711e-13	5.43897	60	1.04733e-09
2914	6.26092e-13	5.43897	60	1.04563e-09
2916	6.25074e-13	5.43897	60	1.04393e-09
2918	6.24056e-13	5.43897	60	1.04223e-09
2920	6.23038e-13	5.43897	60	1.04053e-09
2922	6.2202e-13	5.43897	60	1.03883e-09
2924	6.21002e-13	5.43897	60	1.03713e-09
2926	6.19983e-13	5.43897	60	1.03543e-09
2928	6.18965e-13	5.43897	60	1.03373e-09
2930	6.17947e-13	5.43897	60	1.03203e-09
2932	6.16929e-13	5.43897	60	1.03033e-09
2934	6.15911e-13	5.43897	60	1.02863e-09
2936	6.14893e-13	5.43897	60	1.02692e-09
2938	6.13875e-13	5.43897	60	1.02522e-09
2940	6.12856e-13	5.43897	60	1.02352e-09
2942	6.11838e-13	5.43897	60	1.02182e-09
2944	6.1082e-13	5.43897	60	1.02012e-09
2946	6.09802e-13	5.43897	60	1.01842e-09
2948	6.08784e-13	5.43897	60	1.01672e-09
2950	6.07766e-13	5.43897	60	1.01502e-09
2952	6.06748e-13	5.43897	60	1.01332e-09
2954	6.05729e-13	5.43897	60	1.01162e-09
2956	6.04711e-13	5.43897	60	1.00992e-09
2958	6.03693e-13	5.43897	60	1.00822e-09
2960	6.02675e-13	5.43897	60	1.00652e-09
2962	6.01657e-13	5.43897	60	1.00482e-09
2964	6.00639e-13	5.43897	60	1.00312e-09
2966	5.99621e-13	5.43897	60	1.00142e-09
2968	5.98602e-13	5.43897	60	9.99719e-10
2970	5.97584e-13	5.43897	60	9.98018e-10
2972	5.96566e-13	5.43897	60	9.96318e-10
2974	5.95548e-13	5.43897	60	9.94618e-10
2976	5.9453e-13	5.43897	60	9.92917e-10
2978	5.93512e-13	5.43897	60	9.91217e-10
2980	5.92494e-13	5.43897	60	9.89517e-10
2982	5.91476e-13	5.43897	60	9.87816e-10
2984	5.90457e-13	5.43897	60	9.86116e-10
2986	5.89439e-13	5.43897	60	9.84415e-10
2988	5.88421e-13	5.43897	60	9.82715e-10
2990	5.87403e-13	5.43897	60	9.81015e-10
2992	5.86385e-13	5.43897	60	9.79314e-10
2994	5.85367e-13	5.43897	60	9.77614e-10
2996	5.84349e-13	5.43897	60	9.75913e-10
2998	5.8333e-13	5.43897	60	9.74213e-10
3000	5.82312e-13	5.43897	60	9.72513e-10
3002	5.81294e-13	5.43897	60	9.70812e-10
3004	5.80276e-13	5.43897	60	9.69112e-10
3006	5.79258e-13	5.43897	60	9.67412e-10
3008	5.7824e-13	5.43897	60	9.65711e-10
3010	5.77222e-13	5.43897	60	9.64011e-10
3012	5.76203e-13	5.43897	60	9.6231e-10
3014	5.75185e-13	5.43897	60	9.6061e-10
3016	5.74167e-13	5.43897	60	9.5891e-10
3018	5.73149e-13	5.43897	60	9.57209e-10
3020	5.72131e-13	5.43897	60	9.55509e-10
3022	5.71113e-13	5.43897	60	9.53809e-10
3024	5.70095e-13	5.43897	60	9.52108e-10
3026	5.69077e-13	5.43897	60	9.50408e-10
3028	5.68058e-13	5.43897	60	9.48707e-10
3030	5.6704e-13	5.43897	60	9.47007e-10
3032	5.66022e-13	5.43897	60	9.45307e-10
3034	5.65004e-13	5.43897	60	9.43606e-10
3036	5.63986e-13	5.43897	60	9.41906e-10
3038	5.62968e-13	5.43897	60	9.40206e-10
3040	5.6195e-13	5.43897	60	9.38505e-10
3042	5.60931e-13	5.43897	60	9.36805e-10
3044	5.59913e-13	5.43897	60	9.35104e-10
3046	5.58895e-13	5.43897	60	9.33404e-10
3048	5.57877e-13	5.43897	60	9.31704e-10
3050	5.56859e-13	5.43897	60	9.30003e-10
3052	5.55841e-13	5.43897	60	9.28303e-10
3054	5.54823e-13	5.43897	60	9.26602e-10
3056	5.53804e-13	5.43897	60	9.24902e-10
3058	5.52786e-13	5.43897	60	9.23202e-10
3060	5.51768e-13	5.43897	60	9.21501e-10
3062	5.5075e-13	5.43897	60	9.19801e-10
3064	5.49732e-13	5.43897	60	9.18101e-10
3066	5.48714e-13	5.43897	60	9.164e-10
3068	5.47696e-13	5.43897	60	9.147e-10
3070	5.46677e-13	5.43897	60	9.12999e-10
3072	5.45659e-13	5.43897	60	9.11299e-10
3074	5.44641e-13	5.43897	60	9.09599e-10
3076	5.43623e-13	5.43897	60	9.07898e-10
3078	5.42605e-13	5.43897	60	9.06198e-10
3080	5.41587e-13	5.43897	60	9.04498e-10
3082	5.40569e-13	5.43897	60	9.02797e-10
3084	5.39551e-13	5.43897	60	9.01097e-10
3086	5.38532e-13	5.43897	60	8.99396e-10
3088	5.37514e-13	5.43897	60	8.97696e-10
3090	5.36496e-13	5.43897	60	8.95996e-10
3092	5.35478e-13	5.43897	60	8.94295e-10
3094	5.3446e-13	5.43897	60	8.92595e-10
3096	5.33442e-13	5.43897	60	8.90895e-10
3098	5.32424e-13	5.43897	60	8.89194e-10
3100	5.31405e-13	5.43897	60	8.87494e-10
3102	5.30387e-13	5.43897	60	8.85793e-10
3104	5.29369e-13	5.43897	60	8.84093e-10
3106	5.28351e-13	5.43897	60	8.82393e-10
3108	5.27333e-13	5.43897	60	8.80692e-10
3110	5.26315e-13	5.43897	60	8.78992e-10
3112	5.25297e-13	5.43897	60	8.77291e-10
3114	5.24278e-13	5.43897	60	8.75591e-10
3116	5.2326e-13	5.43897	60	8.73891e-10
3118	5.22242e-13	5.43897	60	8.7219e-10
3120	5.21224e-13	5.43897	60	8.7049e-10
3122	5.20206e-13	5.43897	60	8.6879e-10
3124	5.19188e-13	5.43897	60	8.67089e-10
3126	5.1817e-13	5.43897	60	8.65389e-10
3128	5.17152e-13	5.43897	60	8.63688e-10
3130	5.16133e-13	5.43897	60	8.61988e-10
3132	5.15115e-13	5.43897	60	8.60288e-10
3134	5.14097e-13	5.43897	60	8.58587e-10
3136	5.13079e-13	5.43897	60	8.56887e-10
3138	5.12061e-13	5.43897	60	8.55187e-10
3140	5.11043e-13	5.43897	60	8.53486e-10
3142	5.10025e-13	5.43897	60	8.51786e-10
3144	5.09006e-13	5.43897	60	8.50085e-10
3146	5.07988e-13	5.43897	60	8.48385e-10
3148	5.0697e-13	5.43897	60	8.46685e-10
3150	5.05952e-13	5.43897	60	8.44984e-10
3152	5.04934e-13	5.43897	60	8.43284e-10
3154	5.03916e-13	5.43897	60	8.41584e-10
3156	5.02898e-13	5.43897	60	8.39883e-10
3158	5.01879e-13	5.43897	60	8.38183e-10
3160	5.00861e-13	5.43897	60	8.36482e-10
3162	4.99843e-13	5.43897	60	8.34782e-10
3164	4.98825e-13	5.43897	60	8.33082e-10
3166	4.97807e-13	5.43897	60	8.31381e-10
3168	4.96789e-13	5.43897	60	8.29681e-10
3170	4.95771e-13	5.43897	60	8.27981e-10
3172	4.94752e-13	5.43897	60	8.2628e-10
3174	4.93734e-13	5.43897	60	8.2458e-10
3176	4.92716e-13	5.43897	60	8.22879e-10
3178	4.91698e-13	5.43897	60	8.21179e-10
3180	4.9068e-13	5.43897	60	8.19479e-10
3182	4.89662e-13	5.43897	60	8.17778e-10
3184	4.88644e-13	5.43897	60	8.16078e-10
3186	4.87626e-13	5.43897	60	8.14377e-10
3188	4.86607e-13	5.43897	60	8.12677e-10
3190	4.85589e-13	5.43897	60	8.10977e-10
3192	4.84571e-13	5.43897	60	8.09276e-10
3194	4.83553e-13	5.43897	60	8.07576e-10
3196	4.82535e-13	5.43897	60	8.05876e-10
3198	4.81517e-13	5.43897	60	8.04175e-10
3200	4.80499e-13	5.43897	60	8.02475e-10
3202	4.7948e-13	5.43897	60	8.00774e-10
3204	4.78462e-13	5.43897	60	7.99074e-10
3206	4.77444e-13	5.43897	60	7.97374e-10
3208	4.76426e-13	5.43897	60	7.95673e-10
3210	4.75408e-13	5.43897	60	7.93973e-10
3212	4.7439e-13	5.43897	60	7.92273e-10
3214	4.73372e-13	5.43897	60	7.90572e-10
3216	4.72353e-13	5.43897	60	7.88872e-10
3218	4.71335e-13	5.43897	60	7.87171e-10
3220	4.70317e-13	5.43897	60	7.85471e-10
3222	4.69299e-13	5.43897	60	7.83771e-10
3224	4.68281e-13	5.43897	60	7.8207e-10
3226	4.67263e-13	5.43897	60	7.8037e-10
3228	4.66245e-13	5.43897	60	7.7867e-10
3230	4.65226e-13	5.43897	60	7.76969e-10
3232	4.64208e-13	5.43897	60	7.75269e-10
3234	4.6319e-13	5.43897	60	7.73568e-10
3236	4.62172e-13	5.43897	60	7.71868e-10
3238	4.61154e-13	5.43897	60	7.70168e-10
3240	4.60136e-13	5.43897	60	7.68467e-10
3242	4.59118e-13	5.43897	60	7.66767e-10
3244	4.581e-13	5.43897	60	7.65066e-10
3246	4.57081e-13	5.43897	60	7.63366e-10
3248	4.56063e-13	5.43897	60	7.61666e-10
3250	4.55045e-13	5.43897	60	7.59965e-10
3252	4.54027e-13	5.43897	60	7.58265e-10
3254	4.53009e-13	5.43897	60	7.56565e-10
3256	4.51991e-13	5.43897	60	7.54864e-10
3258	4.50973e-13	5.43897	60	7.53164e-10
3260	4.49954e-13	5.43897	60	7.51463e-10
3262	4.48936e-13	5.43897	60	7.49763e-10
3264	4.47918e-13	5.43897	60	7.48063e-10
3266	4.469e-13	5.43897	60	7.46362e-10
3268	4.45882e-13	5.43897	60	7.44662e-10
3270	4.44864e-13	5.43897	60	7.42962e-10
3272	4.43846e-13	5.43897	60	7.41261e-10
3274	4.42827e-13	5.43897	60	7.39561e-10
3276	4.41809e-13	5.43897	60	7.3786e-10
3278	4.40791e-13	5.43897	60	7.3616e-10
3280	4.39773e-13	5.43897	60	7.3446e-10
3282	4.38755e-13	5.43897	60	7.32759e-10
3284	4.37737e-13	5.43897	60	7.31059e-10
3286	4.36719e-13	5.43897	60	7.29359e-10
3288	4.35701e-13	5.43897	60	7.27658e-10
3290	4.34682e-13	5.43897	60	7.25958e-10
3292	4.33664e-13	5.43897	60	7.24257e-10
3294	4.32646e-13	5.43897	60	7.22557e-10
3296	4.31628e-13	5.43897	60	7.20857e-10
3298	4.3061e-13	5.43897	60	7.19156e-10
3300	4.29592e-13	5.43897	60	7.17456e-10
3302	4.28574e-13	5.43897	60	7.15755e-10
3304	4.27555e-13	5.43897	60	7.14055e-10
3306	4.26537e-13	5.43897	60	7.12355e-10
3308	4.25519e-13	5.43897	60	7.10654e-10
3310	4.24501e-13	5.43897	60	7.08954e-10
3312	4.23483e-13	5.43897	60	7.07254e-10
3314	4.22465e-13	5.43897	60	7.05553e-10
3316	4.21447e-13	5.43897	60	7.03853e-10
3318	4.20428e-13	5.43897	60	7.02152e-10
3320	4.1941e-13	5.43897	60	7.00452e-10
3322	4.18392e-13	5.43897	60	6.98752e-10
3324	4.17374e-13	5.43897	60	6.97051e-10
3326	4.16356e-13	5.43897	60	6.95351e-10
3328	4.15338e-13	5.43897	60	6.93651e-10
3330	4.1432e-13	5.43897	60	6.9195e-10
3332	4.13301e-13	5.43897	60	6.9025e-10
3334	4.12283e-13	5.43897	60	6.88549e-10
3336	4.11265e-13	5.43897	60	6.86849e-10
3338	4.10247e-13	5.43897	60	6.85149e-10
3340	4.09229e-13	5.43897	60	6.83448e-10
3342	4.08211e-13	5.43897	60	6.81748e-10
3344	4.07193e-13	5.43897	60	6.80048e-10
3346	4.06175e-13	5.43897	60	6.78347e-10
3348	4.05156e-13	5.43897	60	6.76647e-10
3350	4.04138e-13	5.43897	60	6.74946e-10
3352	4.0312e-13	5.43897	60	6.73246e-10
3354	4.02102e-13	5.43897	60	6.71546e-10
3356	4.01084e-13	5.43897	60	6.69845e-10
3358	4.00066e-13	5.43897	60	6.68145e-10
3360	3.99048e-13	5.43897	60	6.66445e-10
3362	3.98029e-13	5.43897	60	6.64744e-10
3364	3.97011e-13	5.43897	60	6.63044e-10
3366	3.95993e-13	5.43897	60	6.61343e-10
3368	3.94975e-13	5.43897	60	6.59643e-10
3370	3.93957e-13	5.43897	60	6.57943e-10
3372	3.92939e-13	5.43897	60	6.56242e-10
3374	3.91921e-13	5.43897	60	6.54542e-10
3376	3.90902e-13	5.43897	60	6.52841e-10
3378	3.89884e-13	5.43897	60	6.51141e-10
3380	3.88866e-13	5.43897	60	6.49441e-10
3382	3.87848e-13	5.43897	60	6.4774e-10
3384	3.8683e-13	5.43897	60	6.4604e-10
3386	3.85812e-13	5.43897	60	6.4434e-10
3388	3.84794e-13	5.43897	60	6.42639e-10
3390	3.83776e-13	5.43897	60	6.40939e-10
3392	3.82757e-13	5.43897	60	6.39238e-10
3394	3.81739e-13	5.43897	60	6.37538e-10
3396	3.80721e-13	5.43897	60	6.35838e-10
3398	3.79703e-13	5.43897	60	6.34137e-10
3400	3.78685e-13	5.43897	60	6.32437e-10
3402	3.77667e-13	5.43897	60	6.30737e-10
3404	3.76649e-13	5.43897	60	6.29036e-10
3406	3.7563e-13	5.43897	60	6.27336e-10
3408	3.74612e-13	5.43897	60	6.25635e-10
3410	3.73594e-13	5.43897	60	6.23935e-10
3412	3.72576e-13	5.43897	60	6.22235e-10
3414	3.71558e-13	5.43897	60	6.20534e-10
3416	3.7054e-13	5.43897	60	6.18834e-10
3418	3.69522e-13	5.43897	60	6.17134e-10
3420	3.68503e-13	5.43897	60	6.15433e-10
3422	3.67485e-13	5.43897	60	6.13733e-10
3424	3.66467e-13	5.43897	60	6.12032e-10
3426	3.65449e-13	5.43897	60	6.10332e-10
3428	3.64431e-13	5.43897	60	6.08632e-10
3430	3.63413e-13	5.43897	60	6.06931e-10
3432	3.62395e-13	5.43897	60	6.05231e-10
3434	3.61376e-13	5.43897	60	6.0353e-10
3436	3.60358e-13	5.43897	60	6.0183e-10
3438	3.5934e-13	5.43897	60	6.0013e-10
3440	3.58322e-13	5.43897	60	5.98429e-10
3442	3.57304e-13	5.43897	60	5.96729e-10
3444	3.56286e-13	5.43897	60	5.95029e-10
3446	3.55268e-13	5.43897	60	5.93328e-10
3448	3.5425e-13	5.43897	60	5.91628e-10
3450	3.53231e-13	5.43897	60	5.89927e-10
3452	3.52213e-13	5.43897	60	5.88227e-10
3454	3.51195e-13	5.43897	60	5.86527e-10
3456	3.50177e-13	5.43897	60	5.84826e-10
3458	3.49159e-13	5.43897	60	5.83126e-10
3460	3.48141e-13	5.43897	60	5.81426e-10
3462	3.47123e-13	5.43897	60	5.79725e-10
3464	3.46104e-13	5.43897	60	5.78025e-10
3466	3.45086e-13	5.43897	60	5.76324e-10
3468	3.44068e-13	5.43897	60	5.74624e-10
3470	3.4305e-13	5.43897	60	5.72924e-10
3472	3.42032e-13	5.43897	60	5.71223e-10
3474	3.41014e-13	5.43897	60	5.69523e-10
3476	3.39996e-13	5.43897	60	5.67823e-10
3478	3.38977e-13	5.43897	60	5.66122e-10
3480	3.37959e-13	5.43897	60	5.64422e-10
3482	3.36941e-13	5.43897	60	5.62721e-10
3484	3.35923e-13	5.43897	60	5.61021e-10
3486	3.34905e-13	5.43897	60	5.59321e-10
3488	3.33887e-13	5.43897	60	5.5762e-10
3490	3.32869e-13	5.43897	60	5.5592e-10
3492	3.31851e-13	5.43897	60	5.5422e-10
3494	3.30832e-13	5.43897	60	5.52519e-10
3496	3.29814e-13	5.43897	60	5.50819e-10
3498	3.28796e-13	5.43897	60	5.49118e-10
3500	3.27778e-13	5.43897	60	5.47418e-10
3502	3.2676e-13	5.43897	60	5.45718e-10
3504	3.25742e-13	5.43897	60	5.44017e-10
3506	3.24724e-13	5.43897	60	5.42317e-10
3508	3.23705e-13	5.43897	60	5.40616e-10
3510	3.22687e-13	5.43897	60	5.38916e-10
3512	3.21669e-13	5.43897	60	5.37216e-10
3514	3.20651e-13	5.43897	60	5.35515e-10
3516	3.19633e-13	5.43897	60	5.33815e-10
3518	3.18615e-13	5.43897	60	5.32115e-10
3520	3.17597e-13	5.43897	60	5.30414e-10
3522	3.16578e-13	5.43897	60	5.28714e-10
3524	3.1556e-13	5.43897	60	5.27013e-10
3526	3.14542e-13	5.43897	60	5.25313e-10
3528	3.13524e-13	5.43897	60	5.23613e-10
3530	3.12506e-13	5.43897	60	5.21912e-10
3532	3.11488e-13	5.43897	60	5.20212e-10
3534	3.1047e-13	5.43897	60	5.18512e-10
3536	3.09451e-13	5.43897	60	5.16811e-10
3538	3.08433e-13	5.43897	60	5.15111e-10
3540	3.07415e-13	5.43897	60	5.1341e-10
3542	3.06397e-13	5.43897	60	5.1171e-10
3544	3.05379e-13	5.43897	60	5.1001e-10
3546	3.04361e-13	5.43897	60	5.08309e-10
3548	3.03343e-13	5.43897	60	5.06609e-10
3550	3.02325e-13	5.43897	60	5.04909e-10
3552	3.01306e-13	5.43897	60	5.03208e-10
3554	3.00288e-13	5.43897	60	5.01508e-10
3556	2.9927e-13	5.43897	60	4.99807e-10
3558	2.98252e-13	5.43897	60	4.98107e-10
3560	2.97234e-13	5.43897	60	4.96407e-10
3562	2.96216e-13	5.43897	60	4.94706e-10
3564	2.95198e-13	5.43897	60	4.93006e-10
3566	2.94179e-13	5.43897	60	4.91305e-10
3568	2.93161e-13	5.43897	60	4.89605e-10
3570	2.92143e-13	5.43897	60	4.87905e-10
3572	2.91125e-13	5.43897	60	4.86204e-10
3574	2.90107e-13	5.43897	60	4.84504e-10
3576	2.89089e-13	5.43897	60	4.82804e-10
3578	2.88071e-13	5.43897	60	4.81103e-10
3580	2.87052e-13	5.43897	60	4.79403e-10
3582	2.86034e-13	5.43897	60	4.77702e-10
3584	2.85016e-13	5.43897	60	4.76002e-10
3586	2.83998e-13	5.43897	60	4.74302e-10
3588	2.8298e-13	5.43897	60	4.72601e-10
3590	2.81962e-13	5.43897	60	4.70901e-10
3592	2.80944e-13	5.43897	60	4.69201e-10
3594	2.79925e-13	5.43897	60	4.675e-10
3596	2.78907e-13	5.43897	60	4.658e-10
3598	2.77889e-13	5.43897	60	4.64099e-10
3600	2.76871e-13	5.43897	60	4.62399e-10
3602	2.75853e-13	5.43897	60	4.60699e-10
3604	2.74835e-13	5.43897	60	4.58998e-10
3606	2.73817e-13	5.43897	60	4.57298e-10
3608	2.72799e-13	5.43897	60	4.55598e-10
3610	2.7178e-13	5.43897	60	4.53897e-10
3612	2.70762e-13	5.43897	60	4.52197e-10
3614	2.69744e-13	5.43897	60	4.50496e-10
3616	2.68726e-13	5.43897	60	4.48796e-10
3618	2.67708e-13	5.43897	60	4.47096e-10
3620	2.6669e-13	5.43897	60	4.45395e-10
3622	2.65672e-13	5.43897	60	4.43695e-10
3624	2.64653e-13	5.43897	60	4.41994e-10
3626	2.63635e-13	5.43897	60	4.40294e-10
3628	2.62617e-13	5.43897	60	4.38594e-10
3630	2.61599e-13	5.43897	60	4.36893e-10
3632	2.60581e-13	5.43897	60	4.35193e-10
3634	2.59563e-13	5.43897	60	4.33493e-10
3636	2.58545e-13	5.43897	60	4.31792e-10
3638	2.57526e-13	5.43897	60	4.30092e-10
3640	2.56508e-13	5.43897	60	4.28391e-10
3642	2.5549e-13	5.43897	60	4.26691e-10
3644	2.54472e-13	5.43897	60	4.24991e-10
3646	2.53454e-13	5.43897	60	4.2329e-10
3648	2.52436e-13	5.43897	60	4.2159e-10
3650	2.51418e-13	5.43897	60	4.1989e-10
3652	2.504e-13	5.43897	60	4.18189e-10
3654	2.49381e-13	5.43897	60	4.16489e-10
3656	2.48363e-13	5.43897	60	4.14788e-10
3658	2.47345e-13	5.43897	60	4.13088e-10
3660	2.46327e-13	5.43897	60	4.11388e-10
3662	2.45309e-13	5.43897	60	4.09687e-10
3664	2.44291e-13	5.43897	60	4.07987e-10
3666	2.43273e-13	5.43897	60	4.06287e-10
3668	2.42254e-13	5.43897	60	4.04586e-10
3670	2.41236e-13	5.43897	60	4.02886e-10
3672	2.40218e-13	5.43897	60	4.01185e-10
3674	2.392e-13	5.43897	60	3.99485e-10
3676	2.38182e-13	5.43897	60	3.97785e-10
3678	2.37164e-13	5.43897	60	3.96084e-10
3680	2.36146e-13	5.43897	60	3.94384e-10
3682	2.35127e-13	5.43897	60	3.92684e-10
3684	2.34109e-13	5.43897	60	3.90983e-10
3686	2.33091e-13	5.43897	60	3.89283e-10
3688	2.32073e-13	5.43897	60	3.87582e-10
3690	2.31055e-13	5.43897	60	3.85882e-10
3692	2.30037e-13	5.43897	60	3.84182e-10
3694	2.29019e-13	5.43897	60	3.82481e-10
3696	2.28e-13	5.43897	60	3.80781e-10
3698	2.26982e-13	5.43897	60	3.7908e-10
3700	2.25964e-13	5.43897	60	3.7738e-10
3702	2.24946e-13	5.43897	60	3.7568e-10
3704	2.23928e-13	5.43897	60	3.73979e-10
3706	2.2291e-13	5.43897	60	3.72279e-10
3708	2.21892e-13	5.43897	60	3.70579e-10
3710	2.20874e-13	5.43897	60	3.68878e-10
3712	2.19855e-13	5.43897	60	3.67178e-10
3714	2.18837e-13	5.43897	60	3.65477e-10
3716	2.17819e-13	5.43897	60	3.63777e-10
3718	2.16801e-13	5.43897	60	3.62077e-10
3720	2.15783e-13	5.43897	60	3.60376e-10
3722	2.14765e-13	5.43897	60	3.58676e-10
3724	2.13747e-13	5.43897	60	3.56976e-10
3726	2.12728e-13	5.43897	60	3.55275e-10
3728	2.1171e-13	5.43897	60	3.53575e-10
3730	2.10692e-13	5.43897	60	3.51874e-10
3732	2.09674e-13	5.43897	60	3.50174e-10
3734	2.08656e-13	5.43897	60	3.48474e-10
3736	2.07638e-13	5.43897	60	3.46773e-10
3738	2.0662e-13	5.43897	60	3.45073e-10
3740	2.05601e-13	5.43897	60	3.43373e-10
3742	2.04583e-13	5.43897	60	3.41672e-10
3744	2.03565e-13	5.43897	60	3.39972e-10
3746	2.02547e-13	5.43897	60	3.38271e-10
3748	2.01529e-13	5.43897	60	3.36571e-10
3750	2.00511e-13	5.43897	60	3.34871e-10
3752	1.99493e-13	5.43897	60	3.3317e-10
3754	1.98475e-13	5.43897	60	3.3147e-10
3756	1.97456e-13	5.43897	60	3.29769e-10
3758	1.96438e-13	5.43897	60	3.28069e-10
3760	1.9542e-13	5.43897	60	3.26369e-10
3762	1.94402e-13	5.43897	60	3.24668e-10
3764	1.93384e-13	5.43897	60	3.22968e-10
3766	1.92366e-13	5.43897	60	3.21268e-10
3768	1.91348e-13	5.43897	60	3.19567e-10
3770	1.90329e-13	5.43897	60	3.17867e-10
3772	1.89311e-13	5.43897	60	3.16166e-10
3774	1.88293e-13	5.43897	60	3.14466e-10
3776	1.87275e-13	5.43897	60	3.12766e-10
3778	1.86257e-13	5.43897	60	3.11065e-10
3780	1.85239e-13	5.43897	60	3.09365e-10
3782	1.84221e-13	5.43897	60	3.07665e-10
3784	1.83202e-13	5.43897	60	3.05964e-10
3786	1.82184e-13	5.43897	60	3.04264e-10
3788	1.81166e-13	5.43897	60	3.02563e-10
3790	1.80148e-13	5.43897	60	3.00863e-10
3792	1.7913e-13	5.43897	60	2.99163e-10
3794	1.78112e-13	5.43897	60	2.97462e-10
3796	1.77094e-13	5.43897	60	2.95762e-10
3798	1.76075e-13	5.43897	60	2.94062e-10
3800	1.75057e-13	5.43897	60	2.92361e-10
3802	1.74039e-13	5.43897	60	2.90661e-10
3804	1.73021e-13	5.43897	60	2.8896e-10
3806	1.72003e-13	5.43897	60	2.8726e-10
3808	1.70985e-13	5.43897	60	2.8556e-10
3810	1.69967e-13	5.43897	60	2.83859e-10
3812	1.68949e-13	5.43897	60	2.82159e-10
3814	1.6793e-13	5.43897	60	2.80459e-10
3816	1.66912e-13	5.43897	60	2.78758e-10
3818	1.65894e-13	5.43897	60	2.77058e-10
3820	1.64876e-13	5.43897	60	2.75357e-10
3822	1.63858e-13	5.43897	60	2.73657e-10
3824	1.6284e-13	5.43897	60	2.71957e-10
3826	1.61822e-13	5.43897	60	2.70256e-10
3828	1.60803e-13	5.43897	60	2.68556e-10
3830	1.59785e-13	5.43897	60	2.66855e-10
3832	1.58767e-13	5.43897	60	2.65155e-10
3834	1.57749e-13	5.43897	60	2.63455e-10
3836	1.56731e-13	5.43897	60	2.61754e-10
3838	1.55713e-13	5.43897	60	2.60054e-10
3840	1.54695e-13	5.43897	60	2.58354e-10
3842	1.53676e-13	5.43897	60	2.56653e-10
3844	1.52658e-13	5.43897	60	2.54953e-10
3846	1.5164e-13	5.43897	60	2.53252e-10
3848	1.50622e-13	5.43897	60	2.51552e-10
3850	1.49604e-13	5.43897	60	2.49852e-10
3852	1.48586e-13	5.43897	60	2.48151e-10
3854	1.47568e-13	5.43897	60	2.46451e-10
3856	1.4655e-13	5.43897	60	2.44751e-10
3858	1.45531e-13	5.43897	60	2.4305e-10
3860	1.44513e-13	5.43897	60	2.4135e-10
3862	1.43495e-13	5.43897	60	2.39649e-10
3864	1.42477e-13	5.43897	60	2.37949e-10
3866	1.41459e-13	5.43897	60	2.36249e-10
3868	1.40441e-13	5.43897	60	2.34548e-10
3870	1.39423e-13	5.43897	60	2.32848e-10
3872	1.38404e-13	5.43897	60	2.31148e-10
3874	1.37386e-13	5.43897	60	2.29447e-10
3876	1.36368e-13	5.43897	60	2.27747e-10
3878	1.3535e-13	5.43897	60	2.26046e-10
3880	1.34332e-13	5.43897	60	2.24346e-10
3882	1.33314e-13	5.43897	60	2.22646e-10
3884	1.32296e-13	5.43897	60	2.20945e-10
3886	1.31277e-13	5.43897	60	2.19245e-10
3888	1.30259e-13	5.43897	60	2.17544e-10
3890	1.29241e-13	5.43897	60	2.15844e-10
3892	1.28223e-13	5.43897	60	2.14144e-10
3894	1.27205e-13	5.43897	60	2.12443e-10
3896	1.26187e-13	5.43897	60	2.10743e-10
3898	1.25169e-13	5.43897	60	2.09043e-10
3900	1.2415e-13	5.43897	60	2.07342e-10
3902	1.23132e-13	5.43897	60	2.05642e-10
3904	1.22114e-13	5.43897	60	2.03941e-10
3906	1.21096e-13	5.43897	60	2.02241e-10
3908	1.20078e-13	5.43897	60	2.00541e-10
3910	1.1906e-13	5.43897	60	1.9884e-10
3912	1.18042e-13	5.43897	60	1.9714e-10
3914	1.17024e-13	5.43897	60	1.9544e-10
3916	1.16005e-13	5.43897	60	1.93739e-10
3918	1.14987e-13	5.43897	60	1.92039e-10
3920	1.13969e-13	5.43897	60	1.90338e-10
3922	1.12951e-13	5.43897	60	1.88638e-10
3924	1.11933e-13	5.43897	60	1.86938e-10
3926	1.10915e-13	5.43897	60	1.85237e-10
3928	1.09897e-13	5.43897	60	1.83537e-10
3930	1.08878e-13	5.43897	60	1.81837e-10
3932	1.0786e-13	5.43897	60	1.80136e-10
3934	1.06842e-13	5.43897	60	1.78436e-10
3936	1.05824e-13	5.43897	60	1.76735e-10
3938	1.04806e-13	5.43897	60	1.75035e-10
3940	1.03788e-13	5.43897	60	1.73335e-10
3942	1.0277e-13	5.43897	60	1.71634e-10
3944	1.01751e-13	5.43897	60	1.69934e-10
3946	1.00733e-13	5.43897	60	1.68233e-10
3948	9.97152e-14	5.43897	60	1.66533e-10
3950	9.8697e-14	5.43897	60	1.64833e-10
3952	9.76789e-14	5.43897	60	1.63132e-10
3954	9.66608e-14	5.43897	60	1.61432e-10
3956	9.56426e-14	5.43897	60	1.59732e-10
3958	9.46245e-14	5.43897	60	1.58031e-10
3960	9.36064e-14	5.43897	60	1.56331e-10
3962	9.25882e-14	5.43897	60	1.5463e-10
3964	9.15701e-14	5.43897	60	1.5293e-10
3966	9.05519e-14	5.43897	60	1.5123e-10
3968	8.95338e-14	5.43897	60	1.49529e-10
3970	8.85157e-14	5.43897	60	1.47829e-10
3972	8.74975e-14	5.43897	60	1.46129e-10
3974	8.64794e-14	5.43897	60	1.44428e-10
3976	8.54613e-14	5.43897	60	1.42728e-10
3978	8.44431e-14	5.43897	60	1.41027e-10
3980	8.3425e-14	5.43897	60	1.39327e-10
3982	8.24068e-14	5.43897	60	1.37627e-10
3984	8.13887e-14	5.43897	60	1.35926e-10
3986	8.03706e-14	5.43897	60	1.34226e-10
3988	7.93524e-14	5.43897	60	1.32526e-10
3990	7.83343e-14	5.43897	60	1.30825e-10
3992	7.73162e-14	5.43897	60	1.29125e-10
3994	7.6298e-14	5.43897	60	1.27424e-10
3996	7.52799e-14	5.43897	60	1.25724e-10
[truncated: 2 more rows]

## Sheet: varycA4_600-1Csx1-1Crn1-1Acr
Time	cA4	cleavedRNA	A2>P	cA4_Csx1 + cA4_Csx1_RNA
0	600	0	0	0
2	552.898	0.835806	44.1011	1.00002
4	508.8	1.67161	88.2009	1
6	464.687	2.50742	132.299	1.00032
8	420.6	3.34322	176.395	1.00013
10	376.507	4.17901	220.488	1.00011
12	332.423	5.0148	264.578	0.999999
14	288.334	5.85059	308.663	1.00008
16	244.254	6.68638	352.743	1.00008
18	200.183	7.52216	396.815	1.00007
20	156.125	8.35794	440.875	1.00003
22	112.086	9.19371	484.915	1.00003
24	68.0901	10.0295	528.914	0.999993
26	24.2282	10.8652	572.784	0.999972
28	0.00351965	11.6809	599.01	0.880352
30	0.000940698	12.3045	599.337	0.639837
32	0.000573997	12.7798	599.479	0.507659
34	0.000409322	13.1646	599.572	0.418033
36	0.000312743	13.4848	599.641	0.351197
38	0.000248539	13.7556	599.695	0.298836
40	0.000202576	13.9871	599.739	0.256555
42	0.000168055	14.1865	599.774	0.221708
44	0.000141259	14.3593	599.804	0.192563
46	0.000119928	14.5096	599.829	0.167916
48	0.000102551	14.641	599.851	0.146894
50	8.82836e-05	14.756	599.869	0.128842
52	7.63879e-05	14.857	599.885	0.113255
54	6.63432e-05	14.9459	599.899	0.0997365
56	5.78508e-05	15.0242	599.911	0.0879678
58	5.05698e-05	15.0933	599.921	0.0776901
60	4.43252e-05	15.1544	599.93	0.068691
62	3.89371e-05	15.2085	599.938	0.0607935
64	3.42552e-05	15.2563	599.945	0.0538495
66	3.01944e-05	15.2987	599.952	0.0477336
68	2.66513e-05	15.3363	599.957	0.0423394
70	2.35334e-05	15.3696	599.962	0.0375758
72	2.08285e-05	15.3993	599.966	0.0333643
74	1.84397e-05	15.4256	599.97	0.0296377
76	1.63202e-05	15.4489	599.973	0.0263373
78	1.44839e-05	15.4697	599.976	0.0234121
80	1.28533e-05	15.4881	599.979	0.0208179
82	1.13902e-05	15.5046	599.981	0.018516
84	1.01215e-05	15.5192	599.983	0.0164724
86	9.00363e-06	15.5322	599.985	0.0146573
88	7.9948e-06	15.5437	599.987	0.0130446
90	7.09483e-06	15.554	599.988	0.0116111
92	6.31929e-06	15.5632	599.99	0.0103366
94	5.62885e-06	15.5713	599.991	0.00920321
96	5.00228e-06	15.5786	599.992	0.00819498
98	4.44022e-06	15.5851	599.993	0.00729791
100	3.95733e-06	15.5908	599.993	0.00649962
102	3.53056e-06	15.5959	599.994	0.00578912
104	3.14403e-06	15.6005	599.995	0.00515665
106	2.79175e-06	15.6046	599.995	0.00459355
108	2.48143e-06	15.6082	599.996	0.00409215
110	2.21439e-06	15.6114	599.996	0.00364568
112	1.97742e-06	15.6143	599.997	0.00324809
114	1.76268e-06	15.6169	599.997	0.00289397
116	1.56656e-06	15.6192	599.997	0.00257853
118	1.39021e-06	15.6212	599.998	0.00229753
120	1.23898e-06	15.623	599.998	0.00204722
122	1.10696e-06	15.6246	599.998	0.00182425
124	9.89099e-07	15.6261	599.998	0.00162562
126	8.82176e-07	15.6273	599.999	0.00144864
128	7.84469e-07	15.6285	599.999	0.00129094
130	6.95609e-07	15.6295	599.999	0.0011504
132	6.18647e-07	15.6304	599.999	0.00102518
134	5.52137e-07	15.6312	599.999	0.000913622
136	4.93649e-07	15.6319	599.999	0.000814235
138	4.41381e-07	15.6326	599.999	0.000725681
140	3.94067e-07	15.6332	599.999	0.000646768
142	3.50895e-07	15.6337	599.999	0.000576432
144	3.1141e-07	15.6341	599.999	0.000513731
146	2.76004e-07	15.6345	600	0.000457836
148	2.45496e-07	15.6349	600	0.000408029
150	2.19019e-07	15.6352	600	0.000363659
152	1.95795e-07	15.6355	600	0.000324136
154	1.75199e-07	15.6358	600	0.000288927
156	1.56734e-07	15.636	600	0.000257555
158	1.40024e-07	15.6362	600	0.000229593
160	1.24795e-07	15.6364	600	0.000204662
162	1.10859e-07	15.6365	600	0.000182425
164	9.81352e-08	15.6367	600	0.000162587
166	8.69723e-08	15.6368	600	0.000144895
168	7.72849e-08	15.6369	600	0.000129131
170	6.88502e-08	15.637	600	0.000115093
172	6.14733e-08	15.6371	600	0.000102595
174	5.49849e-08	15.6372	600	9.14707e-05
176	4.92402e-08	15.6373	600	8.15672e-05
178	4.41162e-08	15.6373	600	7.27477e-05
180	3.95107e-08	15.6374	600	6.48889e-05
182	3.53401e-08	15.6374	600	5.7881e-05
184	3.15378e-08	15.6375	600	5.16263e-05
186	2.8052e-08	15.6375	600	4.60384e-05
188	2.48446e-08	15.6376	600	4.10415e-05
190	2.19493e-08	15.6376	600	3.65722e-05
192	1.94109e-08	15.6376	600	3.25814e-05
194	1.71895e-08	15.6376	600	2.90234e-05
196	1.5248e-08	15.6377	600	2.58559e-05
198	1.35524e-08	15.6377	600	2.30397e-05
200	1.20716e-08	15.6377	600	2.05383e-05
202	1.07774e-08	15.6377	600	1.83182e-05
204	9.64426e-09	15.6377	600	1.63485e-05
206	8.64914e-09	15.6377	600	1.4601e-05
208	7.77151e-09	15.6378	600	1.30499e-05
210	6.99314e-09	15.6378	600	1.16717e-05
212	6.298e-09	15.6378	600	1.04452e-05
214	5.67214e-09	15.6378	600	9.35145e-06
216	5.10352e-09	15.6378	600	8.3734e-06
218	4.58197e-09	15.6378	600	7.49596e-06
220	4.09897e-09	15.6378	600	6.70585e-06
222	3.64761e-09	15.6378	600	5.99146e-06
224	3.22317e-09	15.6378	600	5.34296e-06
226	2.83723e-09	15.6378	600	4.7562e-06
228	2.49262e-09	15.6378	600	4.2277e-06
230	2.18607e-09	15.6378	600	3.75311e-06
232	1.9145e-09	15.6378	600	3.32828e-06
234	1.67496e-09	15.6378	600	2.94922e-06
236	1.46464e-09	15.6378	600	2.61217e-06
238	1.2809e-09	15.6378	600	2.31355e-06
240	1.1212e-09	15.6378	600	2.04995e-06
242	9.83181e-10	15.6378	600	1.81814e-06
244	8.64581e-10	15.6378	600	1.61507e-06
246	7.63286e-10	15.6378	600	1.43786e-06
248	6.77304e-10	15.6378	600	1.28379e-06
250	6.04767e-10	15.6378	600	1.15032e-06
252	5.43928e-10	15.6378	600	1.03504e-06
254	4.93157e-10	15.6378	600	9.35716e-07
256	4.50935e-10	15.6378	600	8.5025e-07
258	4.15858e-10	15.6378	600	7.76697e-07
260	3.86627e-10	15.6378	600	7.13249e-07
262	3.62046e-10	15.6378	600	6.58237e-07
264	3.41021e-10	15.6378	600	6.10123e-07
266	3.22557e-10	15.6378	600	5.67499e-07
268	3.05752e-10	15.6378	600	5.2908e-07
270	2.89793e-10	15.6378	600	4.93702e-07
272	2.73959e-10	15.6378	600	4.60317e-07
274	2.57611e-10	15.6378	600	4.27988e-07
276	2.40191e-10	15.6378	600	3.95887e-07
278	2.21222e-10	15.6378	600	3.63289e-07
280	2.00298e-10	15.6378	600	3.29568e-07
282	1.77422e-10	15.6378	600	2.94552e-07
284	1.55426e-10	15.6379	600	2.6116e-07
286	1.34967e-10	15.6379	600	2.30064e-07
288	1.15985e-10	15.6379	600	2.01175e-07
290	9.84213e-11	15.6379	600	1.74404e-07
292	8.22162e-11	15.6379	600	1.49663e-07
294	6.73133e-11	15.6379	600	1.26868e-07
296	5.36564e-11	15.6379	600	1.05935e-07
298	4.11906e-11	15.6379	600	8.67822e-08
300	2.98621e-11	15.6379	600	6.93297e-08
302	1.96181e-11	15.6379	600	5.34987e-08
304	1.04071e-11	15.6379	600	3.92123e-08
306	2.17838e-12	15.6379	600	2.63951e-08
308	-5.11746e-12	15.6379	600	1.49735e-08
310	-1.15289e-11	15.6379	600	4.87518e-09
312	-1.71033e-11	15.6379	600	-3.97038e-09
314	-2.1887e-11	15.6379	600	-1.16323e-08
316	-2.59253e-11	15.6379	600	-1.8178e-08
318	-2.92625e-11	15.6379	600	-2.36735e-08
320	-3.19419e-11	15.6379	600	-2.81833e-08
322	-3.40057e-11	15.6379	600	-3.17704e-08
324	-3.54952e-11	15.6379	600	-3.44963e-08
326	-3.64507e-11	15.6379	600	-3.64209e-08
328	-3.69115e-11	15.6379	600	-3.76029e-08
330	-3.69159e-11	15.6379	600	-3.80993e-08
332	-3.65012e-11	15.6379	600	-3.79658e-08
334	-3.57039e-11	15.6379	600	-3.72568e-08
336	-3.45594e-11	15.6379	600	-3.60249e-08
338	-3.31024e-11	15.6379	600	-3.43218e-08
340	-3.13663e-11	15.6379	600	-3.21974e-08
342	-2.93838e-11	15.6379	600	-2.97006e-08
344	-2.71869e-11	15.6379	600	-2.68785e-08
346	-2.48062e-11	15.6379	600	-2.37774e-08
348	-2.22718e-11	15.6379	600	-2.04418e-08
350	-1.96129e-11	15.6379	600	-1.69151e-08
352	-1.68576e-11	15.6379	600	-1.32394e-08
354	-1.40333e-11	15.6379	600	-9.45551e-09
356	-1.11665e-11	15.6379	600	-5.60291e-09
358	-8.28292e-12	15.6379	600	-1.71987e-09
360	-5.40735e-12	15.6379	600	2.15662e-09
362	-2.56379e-12	15.6379	600	5.99078e-09
364	2.24583e-13	15.6379	600	9.74807e-09
366	2.9354e-12	15.6379	600	1.33952e-08
368	5.5471e-12	15.6379	600	1.68999e-08
370	8.0389e-12	15.6379	600	2.02313e-08
372	1.03908e-11	15.6379	600	2.33596e-08
374	1.25837e-11	15.6379	600	2.62562e-08
376	1.4599e-11	15.6379	600	2.88935e-08
378	1.64191e-11	15.6379	600	3.12452e-08
380	1.8027e-11	15.6379	600	3.32861e-08
382	1.94066e-11	15.6379	600	3.49919e-08
384	2.05424e-11	15.6379	600	3.63397e-08
386	2.14196e-11	15.6379	600	3.73075e-08
388	2.20243e-11	15.6379	600	3.78743e-08
390	2.2343e-11	15.6379	600	3.80203e-08
392	2.23632e-11	15.6379	600	3.77266e-08
394	2.20729e-11	15.6379	600	3.69754e-08
396	2.14609e-11	15.6379	600	3.57499e-08
398	2.05166e-11	15.6379	600	3.40344e-08
400	1.92299e-11	15.6379	600	3.1814e-08
402	1.75918e-11	15.6379	600	2.90748e-08
404	1.56704e-11	15.6379	600	2.59191e-08
406	1.3763e-11	15.6379	600	2.27906e-08
408	1.18994e-11	15.6379	600	1.9734e-08
410	1.00791e-11	15.6379	600	1.67486e-08
412	8.30181e-12	15.6379	600	1.38336e-08
414	6.56691e-12	15.6379	600	1.09882e-08
416	4.87398e-12	15.6379	600	8.21163e-09
418	3.22256e-12	15.6379	600	5.50317e-09
420	1.61219e-12	15.6379	600	2.86205e-09
422	4.24036e-14	15.6379	600	2.87505e-10
424	-1.48725e-12	15.6379	600	-2.2212e-09
426	-2.97724e-12	15.6379	600	-4.66483e-09
428	-4.428e-12	15.6379	600	-7.04412e-09
430	-5.84e-12	15.6379	600	-9.35981e-09
432	-7.21368e-12	15.6379	600	-1.16126e-08
434	-8.54949e-12	15.6379	600	-1.38034e-08
436	-9.84788e-12	15.6379	600	-1.59327e-08
438	-1.11093e-11	15.6379	600	-1.80013e-08
440	-1.23342e-11	15.6379	600	-2.00101e-08
442	-1.35229e-11	15.6379	600	-2.19596e-08
444	-1.46761e-11	15.6379	600	-2.38506e-08
446	-1.5794e-11	15.6379	600	-2.56838e-08
448	-1.68771e-11	15.6379	600	-2.746e-08
450	-1.79258e-11	15.6379	600	-2.91799e-08
452	-1.89407e-11	15.6379	600	-3.0844e-08
454	-1.9922e-11	15.6379	600	-3.24533e-08
456	-2.08703e-11	15.6379	600	-3.40083e-08
458	-2.1786e-11	15.6379	600	-3.55098e-08
460	-2.26694e-11	15.6379	600	-3.69585e-08
462	-2.35211e-11	15.6379	600	-3.83549e-08
464	-2.43413e-11	15.6379	600	-3.97e-08
466	-2.51307e-11	15.6379	600	-4.09943e-08
468	-2.58894e-11	15.6379	600	-4.22384e-08
470	-2.66181e-11	15.6379	600	-4.34332e-08
472	-2.73171e-11	15.6379	600	-4.45792e-08
474	-2.79867e-11	15.6379	600	-4.56772e-08
476	-2.86275e-11	15.6379	600	-4.67278e-08
478	-2.92398e-11	15.6379	600	-4.77317e-08
480	-2.9824e-11	15.6379	600	-4.86896e-08
482	-3.03805e-11	15.6379	600	-4.9602e-08
484	-3.09098e-11	15.6379	600	-5.04697e-08
486	-3.14122e-11	15.6379	600	-5.12934e-08
488	-3.18882e-11	15.6379	600	-5.20736e-08
490	-3.2338e-11	15.6379	600	-5.28111e-08
492	-3.27622e-11	15.6379	600	-5.35065e-08
494	-3.31611e-11	15.6379	600	-5.41604e-08
496	-3.35351e-11	15.6379	600	-5.47734e-08
498	-3.38846e-11	15.6379	600	-5.53463e-08
500	-3.42099e-11	15.6379	600	-5.58796e-08
502	-3.45116e-11	15.6379	600	-5.6374e-08
504	-3.47899e-11	15.6379	600	-5.68301e-08
506	-3.50452e-11	15.6379	600	-5.72485e-08
508	-3.52779e-11	15.6379	600	-5.76299e-08
510	-3.54885e-11	15.6379	600	-5.79749e-08
512	-3.56772e-11	15.6379	600	-5.8284e-08
514	-3.58444e-11	15.6379	600	-5.8558e-08
516	-3.59906e-11	15.6379	600	-5.87974e-08
518	-3.6116e-11	15.6379	600	-5.90029e-08
520	-3.62211e-11	15.6379	600	-5.9175e-08
522	-3.63063e-11	15.6379	600	-5.93144e-08
524	-3.63718e-11	15.6379	600	-5.94216e-08
526	-3.64181e-11	15.6379	600	-5.94972e-08
528	-3.64455e-11	15.6379	600	-5.95419e-08
530	-3.64544e-11	15.6379	600	-5.95562e-08
532	-3.64451e-11	15.6379	600	-5.95408e-08
534	-3.64181e-11	15.6379	600	-5.94962e-08
536	-3.63736e-11	15.6379	600	-5.94229e-08
538	-3.6312e-11	15.6379	600	-5.93217e-08
540	-3.62337e-11	15.6379	600	-5.9193e-08
542	-3.61389e-11	15.6379	600	-5.90375e-08
544	-3.60282e-11	15.6379	600	-5.88556e-08
546	-3.59017e-11	15.6379	600	-5.8648e-08
548	-3.57599e-11	15.6379	600	-5.84153e-08
550	-3.56032e-11	15.6379	600	-5.8158e-08
552	-3.54317e-11	15.6379	600	-5.78767e-08
554	-3.52459e-11	15.6379	600	-5.75718e-08
556	-3.50462e-11	15.6379	600	-5.72441e-08
558	-3.48328e-11	15.6379	600	-5.6894e-08
560	-3.46061e-11	15.6379	600	-5.65221e-08
562	-3.43664e-11	15.6379	600	-5.61289e-08
564	-3.41141e-11	15.6379	600	-5.5715e-08
566	-3.38495e-11	15.6379	600	-5.52809e-08
568	-3.35729e-11	15.6379	600	-5.48272e-08
570	-3.32846e-11	15.6379	600	-5.43544e-08
572	-3.2985e-11	15.6379	600	-5.3863e-08
574	-3.26744e-11	15.6379	600	-5.33536e-08
576	-3.23531e-11	15.6379	600	-5.28267e-08
578	-3.20215e-11	15.6379	600	-5.22828e-08
580	-3.16798e-11	15.6379	600	-5.17224e-08
582	-3.13283e-11	15.6379	600	-5.11461e-08
584	-3.09675e-11	15.6379	600	-5.05543e-08
586	-3.05975e-11	15.6379	600	-4.99477e-08
588	-3.02188e-11	15.6379	600	-4.93266e-08
590	-2.98316e-11	15.6379	600	-4.86917e-08
592	-2.94362e-11	15.6379	600	-4.80434e-08
594	-2.9033e-11	15.6379	600	-4.73822e-08
596	-2.86222e-11	15.6379	600	-4.67086e-08
598	-2.82041e-11	15.6379	600	-4.60231e-08
600	-2.77791e-11	15.6379	600	-4.53263e-08
602	-2.73474e-11	15.6379	600	-4.46186e-08
604	-2.69094e-11	15.6379	600	-4.39004e-08
606	-2.64653e-11	15.6379	600	-4.31724e-08
608	-2.60155e-11	15.6379	600	-4.24349e-08
610	-2.55602e-11	15.6379	600	-4.16885e-08
612	-2.50997e-11	15.6379	600	-4.09336e-08
614	-2.46343e-11	15.6379	600	-4.01707e-08
616	-2.41643e-11	15.6379	600	-3.94003e-08
618	-2.36901e-11	15.6379	600	-3.86229e-08
620	-2.32118e-11	15.6379	600	-3.78389e-08
622	-2.27297e-11	15.6379	600	-3.70487e-08
624	-2.22442e-11	15.6379	600	-3.6253e-08
626	-2.17556e-11	15.6379	600	-3.5452e-08
628	-2.1264e-11	15.6379	600	-3.46463e-08
630	-2.07698e-11	15.6379	600	-3.38364e-08
632	-2.02733e-11	15.6379	600	-3.30226e-08
634	-1.97747e-11	15.6379	600	-3.22055e-08
636	-1.92743e-11	15.6379	600	-3.13854e-08
638	-1.87724e-11	15.6379	600	-3.05629e-08
640	-1.82693e-11	15.6379	600	-2.97383e-08
642	-1.77651e-11	15.6379	600	-2.89122e-08
644	-1.72602e-11	15.6379	600	-2.80849e-08
646	-1.67549e-11	15.6379	600	-2.72568e-08
648	-1.62494e-11	15.6379	600	-2.64285e-08
650	-1.5744e-11	15.6379	600	-2.56004e-08
652	-1.52389e-11	15.6379	600	-2.47728e-08
654	-1.47343e-11	15.6379	600	-2.39462e-08
656	-1.42307e-11	15.6379	600	-2.3121e-08
658	-1.37281e-11	15.6379	600	-2.22976e-08
660	-1.32269e-11	15.6379	600	-2.14765e-08
662	-1.27273e-11	15.6379	600	-2.06581e-08
664	-1.22296e-11	15.6379	600	-1.98428e-08
666	-1.17339e-11	15.6379	600	-1.90309e-08
668	-1.12407e-11	15.6379	600	-1.8223e-08
670	-1.075e-11	15.6379	600	-1.74193e-08
672	-1.02622e-11	15.6379	600	-1.66204e-08
674	-9.77748e-12	15.6379	600	-1.58265e-08
676	-9.2961e-12	15.6379	600	-1.50382e-08
678	-8.81829e-12	15.6379	600	-1.42557e-08
680	-8.3443e-12	15.6379	600	-1.34795e-08
682	-7.87435e-12	15.6379	600	-1.271e-08
684	-7.4087e-12	15.6379	600	-1.19476e-08
686	-6.94756e-12	15.6379	600	-1.11926e-08
688	-6.49118e-12	15.6379	600	-1.04454e-08
690	-6.03979e-12	15.6379	600	-9.70649e-09
692	-5.59361e-12	15.6379	600	-8.97612e-09
694	-5.15287e-12	15.6379	600	-8.25471e-09
696	-4.7178e-12	15.6379	600	-7.54263e-09
698	-4.28863e-12	15.6379	600	-6.84024e-09
700	-3.86557e-12	15.6379	600	-6.14793e-09
702	-3.44886e-12	15.6379	600	-5.46604e-09
704	-3.03871e-12	15.6379	600	-4.79495e-09
706	-2.63534e-12	15.6379	600	-4.13502e-09
708	-2.23896e-12	15.6379	600	-3.48659e-09
710	-1.8498e-12	15.6379	600	-2.85003e-09
712	-1.46808e-12	15.6379	600	-2.22569e-09
714	-1.09399e-12	15.6379	600	-1.61391e-09
716	-7.27758e-13	15.6379	600	-1.01506e-09
718	-3.69592e-13	15.6379	600	-4.29459e-10
720	-1.96992e-14	15.6379	600	1.42534e-10
722	3.21712e-13	15.6379	600	7.00583e-10
724	6.54435e-13	15.6379	600	1.24435e-09
726	9.78266e-13	15.6379	600	1.7735e-09
728	1.293e-12	15.6379	600	2.2877e-09
730	1.59844e-12	15.6379	600	2.78661e-09
732	1.89439e-12	15.6379	600	3.26992e-09
734	2.18063e-12	15.6379	600	3.73729e-09
736	2.45699e-12	15.6379	600	4.18839e-09
738	2.72325e-12	15.6379	600	4.62292e-09
740	2.97923e-12	15.6379	600	5.04054e-09
742	3.22474e-12	15.6379	600	5.44095e-09
744	3.45958e-12	15.6379	600	5.82382e-09
746	3.68356e-12	15.6379	600	6.18886e-09
748	3.89649e-12	15.6379	600	6.53573e-09
750	4.09819e-12	15.6379	600	6.86415e-09
752	4.28847e-12	15.6379	600	7.1738e-09
754	4.46714e-12	15.6379	600	7.46438e-09
756	4.63403e-12	15.6379	600	7.73559e-09
758	4.78894e-12	15.6379	600	7.98713e-09
760	4.93171e-12	15.6379	600	8.21871e-09
762	5.06215e-12	15.6379	600	8.43004e-09
764	5.18009e-12	15.6379	600	8.62081e-09
766	5.28534e-12	15.6379	600	8.79075e-09
768	5.37773e-12	15.6379	600	8.93957e-09
770	5.4571e-12	15.6379	600	9.06698e-09
772	5.52326e-12	15.6379	600	9.1727e-09
774	5.57606e-12	15.6379	600	9.25644e-09
776	5.61531e-12	15.6379	600	9.31795e-09
778	5.64085e-12	15.6379	600	9.35693e-09
780	5.65251e-12	15.6379	600	9.37311e-09
782	5.65014e-12	15.6379	600	9.36623e-09
784	5.63356e-12	15.6379	600	9.33601e-09
786	5.60262e-12	15.6379	600	9.2822e-09
788	5.55715e-12	15.6379	600	9.20451e-09
790	5.49699e-12	15.6379	600	9.10271e-09
792	5.42198e-12	15.6379	600	8.97651e-09
794	5.33198e-12	15.6379	600	8.82568e-09
796	5.22682e-12	15.6379	600	8.64994e-09
798	5.10634e-12	15.6379	600	8.44905e-09
800	4.9704e-12	15.6379	600	8.22276e-09
802	4.81885e-12	15.6379	600	7.97082e-09
804	4.65153e-12	15.6379	600	7.69299e-09
806	4.4683e-12	15.6379	600	7.38901e-09
808	4.269e-12	15.6379	600	7.05865e-09
810	4.0535e-12	15.6379	600	6.70167e-09
812	3.82164e-12	15.6379	600	6.31782e-09
814	3.57329e-12	15.6379	600	5.90689e-09
816	3.3083e-12	15.6379	600	5.46862e-09
818	3.02653e-12	15.6379	600	5.00279e-09
820	2.72784e-12	15.6379	600	4.50918e-09
822	2.41938e-12	15.6379	600	3.99952e-09
824	2.11305e-12	15.6379	600	3.49339e-09
826	1.80901e-12	15.6379	600	2.99104e-09
828	1.50726e-12	15.6379	600	2.49247e-09
830	1.20778e-12	15.6379	600	1.99766e-09
832	9.10575e-13	15.6379	600	1.5066e-09
834	6.15626e-13	15.6379	600	1.01927e-09
836	3.22926e-13	15.6379	600	5.3566e-10
838	3.24662e-14	15.6379	600	5.57502e-11
840	-2.55762e-13	15.6379	600	-4.20472e-10
842	-5.41767e-13	15.6379	600	-8.93021e-10
844	-8.25558e-13	15.6379	600	-1.36191e-09
846	-1.10714e-12	15.6379	600	-1.82716e-09
848	-1.38653e-12	15.6379	600	-2.28878e-09
850	-1.66374e-12	15.6379	600	-2.74678e-09
852	-1.93876e-12	15.6379	600	-3.20119e-09
854	-2.21162e-12	15.6379	600	-3.65201e-09
856	-2.48231e-12	15.6379	600	-4.09926e-09
858	-2.75085e-12	15.6379	600	-4.54295e-09
860	-3.01725e-12	15.6379	600	-4.9831e-09
862	-3.28151e-12	15.6379	600	-5.41972e-09
864	-3.54365e-12	15.6379	600	-5.85283e-09
866	-3.80367e-12	15.6379	600	-6.28244e-09
868	-4.06158e-12	15.6379	600	-6.70857e-09
870	-4.31739e-12	15.6379	600	-7.13122e-09
872	-4.57111e-12	15.6379	600	-7.55042e-09
874	-4.82274e-12	15.6379	600	-7.96618e-09
876	-5.0723e-12	15.6379	600	-8.37851e-09
878	-5.3198e-12	15.6379	600	-8.78742e-09
880	-5.56524e-12	15.6379	600	-9.19294e-09
882	-5.80862e-12	15.6379	600	-9.59507e-09
884	-6.04997e-12	15.6379	600	-9.99383e-09
886	-6.28929e-12	15.6379	600	-1.03892e-08
888	-6.52658e-12	15.6379	600	-1.07813e-08
890	-6.76186e-12	15.6379	600	-1.117e-08
892	-6.99513e-12	15.6379	600	-1.15554e-08
894	-7.22641e-12	15.6379	600	-1.19375e-08
896	-7.45569e-12	15.6379	600	-1.23164e-08
898	-7.68299e-12	15.6379	600	-1.26919e-08
900	-7.90832e-12	15.6379	600	-1.30642e-08
902	-8.13168e-12	15.6379	600	-1.34332e-08
904	-8.35309e-12	15.6379	600	-1.3799e-08
906	-8.57255e-12	15.6379	600	-1.41616e-08
908	-8.79007e-12	15.6379	600	-1.4521e-08
910	-9.00565e-12	15.6379	600	-1.48772e-08
912	-9.21932e-12	15.6379	600	-1.52302e-08
914	-9.43106e-12	15.6379	600	-1.55801e-08
916	-9.64091e-12	15.6379	600	-1.59268e-08
918	-9.84885e-12	15.6379	600	-1.62703e-08
920	-1.00549e-11	15.6379	600	-1.66108e-08
922	-1.02591e-11	15.6379	600	-1.69481e-08
924	-1.04614e-11	15.6379	600	-1.72823e-08
926	-1.06618e-11	15.6379	600	-1.76134e-08
928	-1.08604e-11	15.6379	600	-1.79415e-08
930	-1.10571e-11	15.6379	600	-1.82665e-08
932	-1.12519e-11	15.6379	600	-1.85885e-08
934	-1.1445e-11	15.6379	600	-1.89074e-08
936	-1.16362e-11	15.6379	600	-1.92233e-08
938	-1.18256e-11	15.6379	600	-1.95363e-08
940	-1.20132e-11	15.6379	600	-1.98462e-08
942	-1.2199e-11	15.6379	600	-2.01531e-08
944	-1.23829e-11	15.6379	600	-2.04571e-08
946	-1.25651e-11	15.6379	600	-2.07581e-08
948	-1.27456e-11	15.6379	600	-2.10562e-08
950	-1.29242e-11	15.6379	600	-2.13513e-08
952	-1.31011e-11	15.6379	600	-2.16436e-08
954	-1.32762e-11	15.6379	600	-2.19329e-08
956	-1.34496e-11	15.6379	600	-2.22194e-08
958	-1.36213e-11	15.6379	600	-2.2503e-08
960	-1.37912e-11	15.6379	600	-2.27837e-08
962	-1.39594e-11	15.6379	600	-2.30616e-08
964	-1.41258e-11	15.6379	600	-2.33366e-08
966	-1.42906e-11	15.6379	600	-2.36088e-08
968	-1.44536e-11	15.6379	600	-2.38782e-08
970	-1.4615e-11	15.6379	600	-2.41448e-08
972	-1.47747e-11	15.6379	600	-2.44086e-08
974	-1.49327e-11	15.6379	600	-2.46696e-08
976	-1.5089e-11	15.6379	600	-2.49279e-08
978	-1.52437e-11	15.6379	600	-2.51834e-08
980	-1.53967e-11	15.6379	600	-2.54362e-08
982	-1.55481e-11	15.6379	600	-2.56863e-08
984	-1.56978e-11	15.6379	600	-2.59337e-08
986	-1.58459e-11	15.6379	600	-2.61783e-08
988	-1.59923e-11	15.6379	600	-2.64203e-08
990	-1.61372e-11	15.6379	600	-2.66596e-08
992	-1.62804e-11	15.6379	600	-2.68962e-08
994	-1.6422e-11	15.6379	600	-2.71302e-08
996	-1.65621e-11	15.6379	600	-2.73616e-08
998	-1.67005e-11	15.6379	600	-2.75903e-08
1000	-1.68374e-11	15.6379	600	-2.78164e-08
1002	-1.69727e-11	15.6379	600	-2.80399e-08
1004	-1.71064e-11	15.6379	600	-2.82609e-08
1006	-1.72386e-11	15.6379	600	-2.84792e-08
1008	-1.73692e-11	15.6379	600	-2.8695e-08
1010	-1.74983e-11	15.6379	600	-2.89082e-08
1012	-1.76258e-11	15.6379	600	-2.91189e-08
1014	-1.77518e-11	15.6379	600	-2.93271e-08
1016	-1.78763e-11	15.6379	600	-2.95327e-08
1018	-1.79993e-11	15.6379	600	-2.97359e-08
1020	-1.81207e-11	15.6379	600	-2.99366e-08
1022	-1.82407e-11	15.6379	600	-3.01347e-08
1024	-1.83592e-11	15.6379	600	-3.03304e-08
1026	-1.84761e-11	15.6379	600	-3.05237e-08
1028	-1.85916e-11	15.6379	600	-3.07145e-08
1030	-1.87057e-11	15.6379	600	-3.09029e-08
1032	-1.88182e-11	15.6379	600	-3.10888e-08
1034	-1.89293e-11	15.6379	600	-3.12724e-08
1036	-1.9039e-11	15.6379	600	-3.14535e-08
1038	-1.91472e-11	15.6379	600	-3.16323e-08
1040	-1.92539e-11	15.6379	600	-3.18087e-08
1042	-1.93593e-11	15.6379	600	-3.19827e-08
1044	-1.94632e-11	15.6379	600	-3.21544e-08
1046	-1.95657e-11	15.6379	600	-3.23237e-08
1048	-1.96668e-11	15.6379	600	-3.24907e-08
1050	-1.97665e-11	15.6379	600	-3.26554e-08
1052	-1.98648e-11	15.6379	600	-3.28178e-08
1054	-1.99617e-11	15.6379	600	-3.29779e-08
1056	-2.00572e-11	15.6379	600	-3.31357e-08
1058	-2.01514e-11	15.6379	600	-3.32912e-08
1060	-2.02441e-11	15.6379	600	-3.34445e-08
1062	-2.03356e-11	15.6379	600	-3.35955e-08
1064	-2.04256e-11	15.6379	600	-3.37443e-08
1066	-2.05144e-11	15.6379	600	-3.38908e-08
1068	-2.06017e-11	15.6379	600	-3.40352e-08
1070	-2.06878e-11	15.6379	600	-3.41773e-08
1072	-2.07725e-11	15.6379	600	-3.43173e-08
1074	-2.08559e-11	15.6379	600	-3.4455e-08
1076	-2.0938e-11	15.6379	600	-3.45906e-08
1078	-2.10188e-11	15.6379	600	-3.47241e-08
1080	-2.10982e-11	15.6379	600	-3.48553e-08
1082	-2.11764e-11	15.6379	600	-3.49845e-08
1084	-2.12533e-11	15.6379	600	-3.51115e-08
1086	-2.13289e-11	15.6379	600	-3.52364e-08
1088	-2.14033e-11	15.6379	600	-3.53592e-08
1090	-2.14763e-11	15.6379	600	-3.54799e-08
1092	-2.15481e-11	15.6379	600	-3.55985e-08
1094	-2.16187e-11	15.6379	600	-3.57151e-08
1096	-2.1688e-11	15.6379	600	-3.58296e-08
1098	-2.17561e-11	15.6379	600	-3.5942e-08
1100	-2.18229e-11	15.6379	600	-3.60524e-08
1102	-2.18885e-11	15.6379	600	-3.61608e-08
1104	-2.19529e-11	15.6379	600	-3.62671e-08
1106	-2.20161e-11	15.6379	600	-3.63715e-08
1108	-2.2078e-11	15.6379	600	-3.64738e-08
1110	-2.21388e-11	15.6379	600	-3.65742e-08
1112	-2.21984e-11	15.6379	600	-3.66726e-08
1114	-2.22567e-11	15.6379	600	-3.6769e-08
1116	-2.23139e-11	15.6379	600	-3.68635e-08
1118	-2.23699e-11	15.6379	600	-3.6956e-08
1120	-2.24248e-11	15.6379	600	-3.70466e-08
1122	-2.24785e-11	15.6379	600	-3.71352e-08
1124	-2.2531e-11	15.6379	600	-3.7222e-08
1126	-2.25823e-11	15.6379	600	-3.73068e-08
1128	-2.26326e-11	15.6379	600	-3.73897e-08
1130	-2.26816e-11	15.6379	600	-3.74708e-08
1132	-2.27296e-11	15.6379	600	-3.755e-08
1134	-2.27764e-11	15.6379	600	-3.76273e-08
1136	-2.28221e-11	15.6379	600	-3.77028e-08
1138	-2.28667e-11	15.6379	600	-3.77765e-08
1140	-2.29102e-11	15.6379	600	-3.78483e-08
1142	-2.29526e-11	15.6379	600	-3.79182e-08
1144	-2.29938e-11	15.6379	600	-3.79864e-08
1146	-2.3034e-11	15.6379	600	-3.80528e-08
1148	-2.30731e-11	15.6379	600	-3.81174e-08
1150	-2.31112e-11	15.6379	600	-3.81802e-08
1152	-2.31481e-11	15.6379	600	-3.82412e-08
1154	-2.3184e-11	15.6379	600	-3.83005e-08
1156	-2.32188e-11	15.6379	600	-3.8358e-08
1158	-2.32526e-11	15.6379	600	-3.84138e-08
1160	-2.32853e-11	15.6379	600	-3.84678e-08
1162	-2.3317e-11	15.6379	600	-3.85201e-08
1164	-2.33477e-11	15.6379	600	-3.85707e-08
1166	-2.33773e-11	15.6379	600	-3.86196e-08
1168	-2.34059e-11	15.6379	600	-3.86669e-08
1170	-2.34335e-11	15.6379	600	-3.87124e-08
1172	-2.346e-11	15.6379	600	-3.87563e-08
1174	-2.34856e-11	15.6379	600	-3.87985e-08
1176	-2.35102e-11	15.6379	600	-3.8839e-08
1178	-2.35337e-11	15.6379	600	-3.88779e-08
1180	-2.35563e-11	15.6379	600	-3.89152e-08
1182	-2.35779e-11	15.6379	600	-3.89508e-08
1184	-2.35985e-11	15.6379	600	-3.89848e-08
1186	-2.36182e-11	15.6379	600	-3.90173e-08
1188	-2.36368e-11	15.6379	600	-3.90481e-08
1190	-2.36545e-11	15.6379	600	-3.90773e-08
1192	-2.36713e-11	15.6379	600	-3.9105e-08
1194	-2.36871e-11	15.6379	600	-3.91311e-08
1196	-2.3702e-11	15.6379	600	-3.91556e-08
1198	-2.37159e-11	15.6379	600	-3.91786e-08
1200	-2.37289e-11	15.6379	600	-3.92001e-08
1202	-2.3741e-11	15.6379	600	-3.922e-08
1204	-2.37522e-11	15.6379	600	-3.92384e-08
1206	-2.37624e-11	15.6379	600	-3.92553e-08
1208	-2.37717e-11	15.6379	600	-3.92706e-08
1210	-2.37801e-11	15.6379	600	-3.92845e-08
1212	-2.37877e-11	15.6379	600	-3.92969e-08
1214	-2.37943e-11	15.6379	600	-3.93079e-08
1216	-2.38001e-11	15.6379	600	-3.93173e-08
1218	-2.38049e-11	15.6379	600	-3.93253e-08
1220	-2.38089e-11	15.6379	600	-3.93319e-08
1222	-2.3812e-11	15.6379	600	-3.9337e-08
1224	-2.38143e-11	15.6379	600	-3.93407e-08
1226	-2.38157e-11	15.6379	600	-3.9343e-08
1228	-2.38162e-11	15.6379	600	-3.93438e-08
1230	-2.38159e-11	15.6379	600	-3.93433e-08
1232	-2.38148e-11	15.6379	600	-3.93414e-08
1234	-2.38128e-11	15.6379	600	-3.9338e-08
1236	-2.38099e-11	15.6379	600	-3.93333e-08
1238	-2.38063e-11	15.6379	600	-3.93273e-08
1240	-2.38018e-11	15.6379	600	-3.93199e-08
1242	-2.37965e-11	15.6379	600	-3.93111e-08
1244	-2.37904e-11	15.6379	600	-3.9301e-08
1246	-2.37835e-11	15.6379	600	-3.92895e-08
1248	-2.37758e-11	15.6379	600	-3.92767e-08
1250	-2.37673e-11	15.6379	600	-3.92627e-08
1252	-2.3758e-11	15.6379	600	-3.92473e-08
1254	-2.37479e-11	15.6379	600	-3.92306e-08
1256	-2.37371e-11	15.6379	600	-3.92126e-08
1258	-2.37254e-11	15.6379	600	-3.91933e-08
1260	-2.3713e-11	15.6379	600	-3.91728e-08
1262	-2.36999e-11	15.6379	600	-3.9151e-08
1264	-2.36859e-11	15.6379	600	-3.9128e-08
1266	-2.36712e-11	15.6379	600	-3.91037e-08
1268	-2.36558e-11	15.6379	600	-3.90781e-08
1270	-2.36396e-11	15.6379	600	-3.90514e-08
1272	-2.36227e-11	15.6379	600	-3.90234e-08
1274	-2.36051e-11	15.6379	600	-3.89942e-08
1276	-2.35867e-11	15.6379	600	-3.89638e-08
1278	-2.35676e-11	15.6379	600	-3.89322e-08
1280	-2.35478e-11	15.6379	600	-3.88994e-08
1282	-2.35272e-11	15.6379	600	-3.88654e-08
1284	-2.3506e-11	15.6379	600	-3.88303e-08
1286	-2.3484e-11	15.6379	600	-3.8794e-08
1288	-2.34614e-11	15.6379	600	-3.87565e-08
1290	-2.3438e-11	15.6379	600	-3.87179e-08
1292	-2.3414e-11	15.6379	600	-3.86782e-08
1294	-2.33893e-11	15.6379	600	-3.86373e-08
1296	-2.33639e-11	15.6379	600	-3.85953e-08
1298	-2.33378e-11	15.6379	600	-3.85522e-08
1300	-2.33111e-11	15.6379	600	-3.8508e-08
1302	-2.32837e-11	15.6379	600	-3.84627e-08
1304	-2.32556e-11	15.6379	600	-3.84163e-08
1306	-2.32269e-11	15.6379	600	-3.83688e-08
1308	-2.31975e-11	15.6379	600	-3.83202e-08
1310	-2.31675e-11	15.6379	600	-3.82706e-08
1312	-2.31368e-11	15.6379	600	-3.82199e-08
1314	-2.31055e-11	15.6379	600	-3.81682e-08
1316	-2.30736e-11	15.6379	600	-3.81154e-08
1318	-2.30411e-11	15.6379	600	-3.80616e-08
1320	-2.30079e-11	15.6379	600	-3.80067e-08
1322	-2.29741e-11	15.6379	600	-3.79509e-08
1324	-2.29397e-11	15.6379	600	-3.7894e-08
1326	-2.29047e-11	15.6379	600	-3.78361e-08
1328	-2.2869e-11	15.6379	600	-3.77772e-08
1330	-2.28328e-11	15.6379	600	-3.77174e-08
1332	-2.2796e-11	15.6379	600	-3.76565e-08
1334	-2.27586e-11	15.6379	600	-3.75947e-08
1336	-2.27206e-11	15.6379	600	-3.75319e-08
1338	-2.26821e-11	15.6379	600	-3.74681e-08
1340	-2.26429e-11	15.6379	600	-3.74034e-08
1342	-2.26032e-11	15.6379	600	-3.73378e-08
1344	-2.25629e-11	15.6379	600	-3.72712e-08
1346	-2.25221e-11	15.6379	600	-3.72037e-08
1348	-2.24807e-11	15.6379	600	-3.71353e-08
1350	-2.24388e-11	15.6379	600	-3.70659e-08
1352	-2.23963e-11	15.6379	600	-3.69957e-08
1354	-2.23532e-11	15.6379	600	-3.69245e-08
1356	-2.23096e-11	15.6379	600	-3.68525e-08
1358	-2.22655e-11	15.6379	600	-3.67795e-08
1360	-2.22209e-11	15.6379	600	-3.67057e-08
1362	-2.21757e-11	15.6379	600	-3.66311e-08
1364	-2.213e-11	15.6379	600	-3.65555e-08
1366	-2.20838e-11	15.6379	600	-3.64791e-08
1368	-2.2037e-11	15.6379	600	-3.64019e-08
1370	-2.19898e-11	15.6379	600	-3.63238e-08
1372	-2.1942e-11	15.6379	600	-3.62449e-08
1374	-2.18938e-11	15.6379	600	-3.61651e-08
1376	-2.18451e-11	15.6379	600	-3.60846e-08
1378	-2.17958e-11	15.6379	600	-3.60032e-08
1380	-2.17461e-11	15.6379	600	-3.5921e-08
1382	-2.16959e-11	15.6379	600	-3.5838e-08
1384	-2.16452e-11	15.6379	600	-3.57542e-08
1386	-2.1594e-11	15.6379	600	-3.56697e-08
1388	-2.15424e-11	15.6379	600	-3.55843e-08
1390	-2.14903e-11	15.6379	600	-3.54982e-08
1392	-2.14378e-11	15.6379	600	-3.54114e-08
1394	-2.13847e-11	15.6379	600	-3.53237e-08
1396	-2.13313e-11	15.6379	600	-3.52353e-08
1398	-2.12773e-11	15.6379	600	-3.51462e-08
1400	-2.1223e-11	15.6379	600	-3.50563e-08
1402	-2.11682e-11	15.6379	600	-3.49657e-08
1404	-2.11129e-11	15.6379	600	-3.48744e-08
1406	-2.10572e-11	15.6379	600	-3.47824e-08
1408	-2.10011e-11	15.6379	600	-3.46897e-08
1410	-2.09446e-11	15.6379	600	-3.45962e-08
1412	-2.08876e-11	15.6379	600	-3.45021e-08
1414	-2.08302e-11	15.6379	600	-3.44072e-08
1416	-2.07724e-11	15.6379	600	-3.43117e-08
1418	-2.07142e-11	15.6379	600	-3.42155e-08
1420	-2.06556e-11	15.6379	600	-3.41186e-08
1422	-2.05966e-11	15.6379	600	-3.40211e-08
1424	-2.05372e-11	15.6379	600	-3.39229e-08
1426	-2.04774e-11	15.6379	600	-3.38241e-08
1428	-2.04172e-11	15.6379	600	-3.37246e-08
1430	-2.03566e-11	15.6379	600	-3.36245e-08
1432	-2.02957e-11	15.6379	600	-3.35237e-08
1434	-2.02343e-11	15.6379	600	-3.34224e-08
1436	-2.01726e-11	15.6379	600	-3.33204e-08
1438	-2.01105e-11	15.6379	600	-3.32178e-08
1440	-2.00481e-11	15.6379	600	-3.31146e-08
1442	-1.99853e-11	15.6379	600	-3.30107e-08
1444	-1.99221e-11	15.6379	600	-3.29063e-08
1446	-1.98586e-11	15.6379	600	-3.28014e-08
1448	-1.97947e-11	15.6379	600	-3.26958e-08
1450	-1.97305e-11	15.6379	600	-3.25896e-08
1452	-1.96659e-11	15.6379	600	-3.24829e-08
1454	-1.9601e-11	15.6379	600	-3.23756e-08
1456	-1.95358e-11	15.6379	600	-3.22678e-08
1458	-1.94702e-11	15.6379	600	-3.21594e-08
1460	-1.94043e-11	15.6379	600	-3.20505e-08
1462	-1.9338e-11	15.6379	600	-3.1941e-08
1464	-1.92715e-11	15.6379	600	-3.1831e-08
1466	-1.92046e-11	15.6379	600	-3.17205e-08
1468	-1.91374e-11	15.6379	600	-3.16095e-08
1470	-1.90699e-11	15.6379	600	-3.14979e-08
1472	-1.90021e-11	15.6379	600	-3.13858e-08
1474	-1.8934e-11	15.6379	600	-3.12733e-08
1476	-1.88656e-11	15.6379	600	-3.11602e-08
1478	-1.87969e-11	15.6379	600	-3.10467e-08
1480	-1.87279e-11	15.6379	600	-3.09326e-08
1482	-1.86586e-11	15.6379	600	-3.08181e-08
1484	-1.8589e-11	15.6379	600	-3.07031e-08
1486	-1.85191e-11	15.6379	600	-3.05877e-08
1488	-1.8449e-11	15.6379	600	-3.04718e-08
1490	-1.83786e-11	15.6379	600	-3.03554e-08
1492	-1.83079e-11	15.6379	600	-3.02386e-08
1494	-1.82369e-11	15.6379	600	-3.01213e-08
1496	-1.81657e-11	15.6379	600	-3.00036e-08
1498	-1.80942e-11	15.6379	600	-2.98855e-08
1500	-1.80225e-11	15.6379	600	-2.97669e-08
1502	-1.79505e-11	15.6379	600	-2.9648e-08
1504	-1.78783e-11	15.6379	600	-2.95286e-08
1506	-1.78058e-11	15.6379	600	-2.94088e-08
1508	-1.7733e-11	15.6379	600	-2.92885e-08
1510	-1.76601e-11	15.6379	600	-2.91679e-08
1512	-1.75868e-11	15.6379	600	-2.90469e-08
1514	-1.75134e-11	15.6379	600	-2.89256e-08
1516	-1.74397e-11	15.6379	600	-2.88038e-08
1518	-1.73658e-11	15.6379	600	-2.86816e-08
1520	-1.72917e-11	15.6379	600	-2.85591e-08
1522	-1.72173e-11	15.6379	600	-2.84362e-08
1524	-1.71427e-11	15.6379	600	-2.8313e-08
1526	-1.70679e-11	15.6379	600	-2.81894e-08
1528	-1.69929e-11	15.6379	600	-2.80655e-08
1530	-1.69177e-11	15.6379	600	-2.79412e-08
1532	-1.68423e-11	15.6379	600	-2.78165e-08
1534	-1.67667e-11	15.6379	600	-2.76916e-08
1536	-1.66909e-11	15.6379	600	-2.75663e-08
1538	-1.66149e-11	15.6379	600	-2.74407e-08
1540	-1.65387e-11	15.6379	600	-2.73147e-08
1542	-1.64623e-11	15.6379	600	-2.71885e-08
1544	-1.63857e-11	15.6379	600	-2.70619e-08
1546	-1.63089e-11	15.6379	600	-2.69351e-08
1548	-1.6232e-11	15.6379	600	-2.68079e-08
1550	-1.61549e-11	15.6379	600	-2.66805e-08
1552	-1.60776e-11	15.6379	600	-2.65527e-08
1554	-1.60001e-11	15.6379	600	-2.64247e-08
1556	-1.59225e-11	15.6379	600	-2.62964e-08
1558	-1.58447e-11	15.6379	600	-2.61679e-08
1560	-1.57667e-11	15.6379	600	-2.6039e-08
1562	-1.56886e-11	15.6379	600	-2.591e-08
1564	-1.56103e-11	15.6379	600	-2.57806e-08
1566	-1.55319e-11	15.6379	600	-2.5651e-08
1568	-1.54533e-11	15.6379	600	-2.55212e-08
1570	-1.53746e-11	15.6379	600	-2.53911e-08
1572	-1.52957e-11	15.6379	600	-2.52607e-08
1574	-1.52167e-11	15.6379	600	-2.51302e-08
1576	-1.51376e-11	15.6379	600	-2.49994e-08
1578	-1.50583e-11	15.6379	600	-2.48684e-08
1580	-1.49789e-11	15.6379	600	-2.47371e-08
1582	-1.48994e-11	15.6379	600	-2.46057e-08
1584	-1.48197e-11	15.6379	600	-2.44741e-08
1586	-1.47399e-11	15.6379	600	-2.43422e-08
1588	-1.466e-11	15.6379	600	-2.42102e-08
1590	-1.458e-11	15.6379	600	-2.40779e-08
1592	-1.44998e-11	15.6379	600	-2.39455e-08
1594	-1.44196e-11	15.6379	600	-2.38128e-08
1596	-1.43392e-11	15.6379	600	-2.368e-08
1598	-1.42587e-11	15.6379	600	-2.35471e-08
1600	-1.41782e-11	15.6379	600	-2.34139e-08
1602	-1.40975e-11	15.6379	600	-2.32806e-08
1604	-1.40167e-11	15.6379	600	-2.31471e-08
1606	-1.39359e-11	15.6379	600	-2.30135e-08
1608	-1.38549e-11	15.6379	600	-2.28797e-08
1610	-1.37739e-11	15.6379	600	-2.27458e-08
1612	-1.36927e-11	15.6379	600	-2.26117e-08
1614	-1.36115e-11	15.6379	600	-2.24775e-08
1616	-1.35302e-11	15.6379	600	-2.23431e-08
1618	-1.34488e-11	15.6379	600	-2.22086e-08
1620	-1.33674e-11	15.6379	600	-2.2074e-08
1622	-1.32858e-11	15.6379	600	-2.19393e-08
1624	-1.32042e-11	15.6379	600	-2.18044e-08
1626	-1.31225e-11	15.6379	600	-2.16695e-08
1628	-1.30408e-11	15.6379	600	-2.15344e-08
1630	-1.2959e-11	15.6379	600	-2.13992e-08
1632	-1.28771e-11	15.6379	600	-2.1264e-08
1634	-1.27952e-11	15.6379	600	-2.11286e-08
1636	-1.27133e-11	15.6379	600	-2.09931e-08
1638	-1.26312e-11	15.6379	600	-2.08576e-08
1640	-1.25491e-11	15.6379	600	-2.07219e-08
1642	-1.2467e-11	15.6379	600	-2.05862e-08
1644	-1.23848e-11	15.6379	600	-2.04504e-08
1646	-1.23026e-11	15.6379	600	-2.03146e-08
1648	-1.22204e-11	15.6379	600	-2.01787e-08
1650	-1.21381e-11	15.6379	600	-2.00427e-08
1652	-1.20558e-11	15.6379	600	-1.99066e-08
1654	-1.19734e-11	15.6379	600	-1.97705e-08
1656	-1.1891e-11	15.6379	600	-1.96344e-08
1658	-1.18086e-11	15.6379	600	-1.94982e-08
1660	-1.17261e-11	15.6379	600	-1.93619e-08
1662	-1.16437e-11	15.6379	600	-1.92256e-08
1664	-1.15612e-11	15.6379	600	-1.90893e-08
1666	-1.14787e-11	15.6379	600	-1.8953e-08
1668	-1.13961e-11	15.6379	600	-1.88166e-08
1670	-1.13136e-11	15.6379	600	-1.86802e-08
1672	-1.1231e-11	15.6379	600	-1.85438e-08
1674	-1.11485e-11	15.6379	600	-1.84074e-08
1676	-1.10659e-11	15.6379	600	-1.82709e-08
1678	-1.09833e-11	15.6379	600	-1.81345e-08
1680	-1.09008e-11	15.6379	600	-1.7998e-08
1682	-1.08182e-11	15.6379	600	-1.78616e-08
1684	-1.07356e-11	15.6379	600	-1.77252e-08
1686	-1.06531e-11	15.6379	600	-1.75887e-08
1688	-1.05705e-11	15.6379	600	-1.74523e-08
1690	-1.04879e-11	15.6379	600	-1.73159e-08
1692	-1.04054e-11	15.6379	600	-1.71795e-08
1694	-1.03229e-11	15.6379	600	-1.70431e-08
1696	-1.02404e-11	15.6379	600	-1.69068e-08
1698	-1.01579e-11	15.6379	600	-1.67705e-08
1700	-1.00754e-11	15.6379	600	-1.66342e-08
1702	-9.99296e-12	15.6379	600	-1.64979e-08
1704	-9.91054e-12	15.6379	600	-1.63617e-08
1706	-9.82814e-12	15.6379	600	-1.62256e-08
1708	-9.74577e-12	15.6379	600	-1.60895e-08
1710	-9.66343e-12	15.6379	600	-1.59534e-08
1712	-9.58113e-12	15.6379	600	-1.58174e-08
1714	-9.49886e-12	15.6379	600	-1.56815e-08
1716	-9.41663e-12	15.6379	600	-1.55456e-08
1718	-9.33444e-12	15.6379	600	-1.54098e-08
1720	-9.25229e-12	15.6379	600	-1.5274e-08
1722	-9.17018e-12	15.6379	600	-1.51384e-08
1724	-9.08812e-12	15.6379	600	-1.50028e-08
1726	-9.00611e-12	15.6379	600	-1.48672e-08
1728	-8.92414e-12	15.6379	600	-1.47318e-08
1730	-8.84223e-12	15.6379	600	-1.45965e-08
1732	-8.76037e-12	15.6379	600	-1.44612e-08
1734	-8.67857e-12	15.6379	600	-1.4326e-08
1736	-8.59683e-12	15.6379	600	-1.41909e-08
1738	-8.51514e-12	15.6379	600	-1.4056e-08
1740	-8.43352e-12	15.6379	600	-1.39211e-08
1742	-8.35196e-12	15.6379	600	-1.37863e-08
1744	-8.27047e-12	15.6379	600	-1.36517e-08
1746	-8.18904e-12	15.6379	600	-1.35171e-08
1748	-8.10769e-12	15.6379	600	-1.33827e-08
1750	-8.0264e-12	15.6379	600	-1.32484e-08
1752	-7.94519e-12	15.6379	600	-1.31142e-08
1754	-7.86405e-12	15.6379	600	-1.29801e-08
1756	-7.783e-12	15.6379	600	-1.28462e-08
1758	-7.70202e-12	15.6379	600	-1.27124e-08
1760	-7.62112e-12	15.6379	600	-1.25787e-08
1762	-7.5403e-12	15.6379	600	-1.24451e-08
1764	-7.45957e-12	15.6379	600	-1.23117e-08
1766	-7.37892e-12	15.6379	600	-1.21785e-08
1768	-7.29837e-12	15.6379	600	-1.20454e-08
1770	-7.2179e-12	15.6379	600	-1.19124e-08
1772	-7.13752e-12	15.6379	600	-1.17796e-08
1774	-7.05724e-12	15.6379	600	-1.16469e-08
1776	-6.97706e-12	15.6379	600	-1.15144e-08
1778	-6.89697e-12	15.6379	600	-1.13821e-08
1780	-6.81698e-12	15.6379	600	-1.12499e-08
1782	-6.73709e-12	15.6379	600	-1.11179e-08
1784	-6.6573e-12	15.6379	600	-1.09861e-08
1786	-6.57762e-12	15.6379	600	-1.08544e-08
1788	-6.49804e-12	15.6379	600	-1.07229e-08
1790	-6.41857e-12	15.6379	600	-1.05916e-08
1792	-6.33921e-12	15.6379	600	-1.04605e-08
1794	-6.25996e-12	15.6379	600	-1.03295e-08
1796	-6.18082e-12	15.6379	600	-1.01988e-08
1798	-6.1018e-12	15.6379	600	-1.00682e-08
1800	-6.02289e-12	15.6379	600	-9.93781e-09
1802	-5.94411e-12	15.6379	600	-9.80762e-09
1804	-5.86544e-12	15.6379	600	-9.67763e-09
1806	-5.78689e-12	15.6379	600	-9.54784e-09
1808	-5.70846e-12	15.6379	600	-9.41825e-09
1810	-5.63016e-12	15.6379	600	-9.28887e-09
1812	-5.55198e-12	15.6379	600	-9.15969e-09
1814	-5.47393e-12	15.6379	600	-9.03072e-09
1816	-5.39601e-12	15.6379	600	-8.90197e-09
1818	-5.31822e-12	15.6379	600	-8.77343e-09
1820	-5.24056e-12	15.6379	600	-8.64511e-09
1822	-5.16303e-12	15.6379	600	-8.51701e-09
1824	-5.08564e-12	15.6379	600	-8.38914e-09
1826	-5.00839e-12	15.6379	600	-8.26149e-09
1828	-4.93127e-12	15.6379	600	-8.13407e-09
1830	-4.8543e-12	15.6379	600	-8.00687e-09
1832	-4.77746e-12	15.6379	600	-7.87992e-09
1834	-4.70077e-12	15.6379	600	-7.75319e-09
1836	-4.62422e-12	15.6379	600	-7.62671e-09
1838	-4.54781e-12	15.6379	600	-7.50046e-09
1840	-4.47156e-12	15.6379	600	-7.37446e-09
1842	-4.39545e-12	15.6379	600	-7.2487e-09
1844	-4.31949e-12	15.6379	600	-7.12319e-09
1846	-4.24368e-12	15.6379	600	-6.99793e-09
1848	-4.16802e-12	15.6379	600	-6.87293e-09
1850	-4.09252e-12	15.6379	600	-6.74817e-09
1852	-4.01718e-12	15.6379	600	-6.62368e-09
1854	-3.94199e-12	15.6379	600	-6.49944e-09
1856	-3.86696e-12	15.6379	600	-6.37546e-09
1858	-3.79208e-12	15.6379	600	-6.25175e-09
1860	-3.71737e-12	15.6379	600	-6.12831e-09
1862	-3.64282e-12	15.6379	600	-6.00513e-09
1864	-3.56844e-12	15.6379	600	-5.88222e-09
1866	-3.49422e-12	15.6379	600	-5.75958e-09
1868	-3.42016e-12	15.6379	600	-5.63722e-09
1870	-3.34628e-12	15.6379	600	-5.51514e-09
1872	-3.27256e-12	15.6379	600	-5.39333e-09
1874	-3.19901e-12	15.6379	600	-5.27181e-09
1876	-3.12563e-12	15.6379	600	-5.15057e-09
1878	-3.05243e-12	15.6379	600	-5.02961e-09
1880	-2.9794e-12	15.6379	600	-4.90894e-09
1882	-2.90654e-12	15.6379	600	-4.78856e-09
1884	-2.83386e-12	15.6379	600	-4.66848e-09
1886	-2.76136e-12	15.6379	600	-4.54868e-09
1888	-2.68903e-12	15.6379	600	-4.42918e-09
1890	-2.61689e-12	15.6379	600	-4.30998e-09
1892	-2.54493e-12	15.6379	600	-4.19108e-09
1894	-2.47315e-12	15.6379	600	-4.07248e-09
1896	-2.40155e-12	15.6379	600	-3.95418e-09
1898	-2.33014e-12	15.6379	600	-3.83619e-09
1900	-2.25892e-12	15.6379	600	-3.7185e-09
1902	-2.18788e-12	15.6379	600	-3.60113e-09
1904	-2.11703e-12	15.6379	600	-3.48406e-09
1906	-2.04637e-12	15.6379	600	-3.36731e-09
1908	-1.9759e-12	15.6379	600	-3.25087e-09
1910	-1.90562e-12	15.6379	600	-3.13475e-09
1912	-1.83553e-12	15.6379	600	-3.01895e-09
1914	-1.76564e-12	15.6379	600	-2.90347e-09
1916	-1.69594e-12	15.6379	600	-2.78831e-09
1918	-1.62644e-12	15.6379	600	-2.67348e-09
1920	-1.55713e-12	15.6379	600	-2.55897e-09
1922	-1.48802e-12	15.6379	600	-2.44478e-09
1924	-1.41912e-12	15.6379	600	-2.33093e-09
1926	-1.35041e-12	15.6379	600	-2.21741e-09
1928	-1.2819e-12	15.6379	600	-2.10422e-09
1930	-1.2136e-12	15.6379	600	-1.99136e-09
1932	-1.1455e-12	15.6379	600	-1.87884e-09
1934	-1.0776e-12	15.6379	600	-1.76666e-09
1936	-1.00991e-12	15.6379	600	-1.65482e-09
1938	-9.42424e-13	15.6379	600	-1.54331e-09
1940	-8.75146e-13	15.6379	600	-1.43215e-09
1942	-8.08076e-13	15.6379	600	-1.32134e-09
1944	-7.41216e-13	15.6379	600	-1.21087e-09
1946	-6.74565e-13	15.6379	600	-1.10075e-09
1948	-6.08126e-13	15.6379	600	-9.90973e-10
1950	-5.41898e-13	15.6379	600	-8.8155e-10
1952	-4.75884e-13	15.6379	600	-7.72479e-10
1954	-4.10083e-13	15.6379	600	-6.63761e-10
1956	-3.44497e-13	15.6379	600	-5.55398e-10
1958	-2.79127e-13	15.6379	600	-4.47392e-10
1960	-2.13973e-13	15.6379	600	-3.39744e-10
1962	-1.49037e-13	15.6379	600	-2.32455e-10
1964	-8.43192e-14	15.6379	600	-1.25527e-10
1966	-1.98205e-14	15.6379	600	-1.89614e-11
1968	4.44581e-14	15.6379	600	8.72406e-11
1970	1.08516e-13	15.6379	600	1.93077e-10
1972	1.72352e-13	15.6379	600	2.98548e-10
1974	2.35965e-13	15.6379	600	4.0365e-10
1976	2.99355e-13	15.6379	600	5.08383e-10
1978	3.62521e-13	15.6379	600	6.12746e-10
1980	4.25461e-13	15.6379	600	7.16736e-10
1982	4.88176e-13	15.6379	600	8.20353e-10
1984	5.50664e-13	15.6379	600	9.23596e-10
1986	6.12925e-13	15.6379	600	1.02646e-09
1988	6.74957e-13	15.6379	600	1.12895e-09
1990	7.36761e-13	15.6379	600	1.23106e-09
1992	7.98335e-13	15.6379	600	1.33279e-09
1994	8.59678e-13	15.6379	600	1.43415e-09
1996	9.2079e-13	15.6379	600	1.53511e-09
1998	9.81671e-13	15.6379	600	1.6357e-09
2000	1.04232e-12	15.6379	600	1.7359e-09
2002	1.10273e-12	15.6379	600	1.83571e-09
2004	1.16291e-12	15.6379	600	1.93514e-09
2006	1.22286e-12	15.6379	600	2.03418e-09
2008	1.28257e-12	15.6379	600	2.13283e-09
2010	1.34204e-12	15.6379	600	2.23109e-09
2012	1.40128e-12	15.6379	600	2.32896e-09
2014	1.46028e-12	15.6379	600	2.42644e-09
2016	1.51904e-12	15.6379	600	2.52352e-09
2018	1.57756e-12	15.6379	600	2.62021e-09
2020	1.63584e-12	15.6379	600	2.7165e-09
2022	1.69389e-12	15.6379	600	2.81239e-09
2024	1.75169e-12	15.6379	600	2.90789e-09
2026	1.80925e-12	15.6379	600	3.00299e-09
2028	1.86657e-12	15.6379	600	3.09769e-09
2030	1.92364e-12	15.6379	600	3.19198e-09
2032	1.98047e-12	15.6379	600	3.28588e-09
2034	2.03706e-12	15.6379	600	3.37937e-09
2036	2.09341e-12	15.6379	600	3.47246e-09
2038	2.14951e-12	15.6379	600	3.56514e-09
2040	2.20536e-12	15.6379	600	3.65742e-09
2042	2.26097e-12	15.6379	600	3.74929e-09
2044	2.31633e-12	15.6379	600	3.84076e-09
2046	2.37145e-12	15.6379	600	3.93181e-09
2048	2.42631e-12	15.6379	600	4.02246e-09
2050	2.48093e-12	15.6379	600	4.11269e-09
2052	2.5353e-12	15.6379	600	4.20252e-09
2054	2.58942e-12	15.6379	600	4.29193e-09
2056	2.64329e-12	15.6379	600	4.38093e-09
2058	2.69691e-12	15.6379	600	4.46952e-09
2060	2.75028e-12	15.6379	600	4.55769e-09
2062	2.8034e-12	15.6379	600	4.64545e-09
2064	2.85627e-12	15.6379	600	4.73279e-09
2066	2.90888e-12	15.6379	600	4.81971e-09
2068	2.96125e-12	15.6379	600	4.90622e-09
2070	3.01336e-12	15.6379	600	4.99231e-09
2072	3.06521e-12	15.6379	600	5.07798e-09
2074	3.11681e-12	15.6379	600	5.16323e-09
2076	3.16816e-12	15.6379	600	5.24806e-09
2078	3.21925e-12	15.6379	600	5.33247e-09
2080	3.27009e-12	15.6379	600	5.41646e-09
2082	3.32067e-12	15.6379	600	5.50002e-09
2084	3.371e-12	15.6379	600	5.58316e-09
2086	3.42107e-12	15.6379	600	5.66588e-09
2088	3.47088e-12	15.6379	600	5.74818e-09
2090	3.52044e-12	15.6379	600	5.83005e-09
2092	3.56974e-12	15.6379	600	5.91149e-09
2094	3.61878e-12	15.6379	600	5.99251e-09
2096	3.66756e-12	15.6379	600	6.0731e-09
2098	3.71609e-12	15.6379	600	6.15326e-09
2100	3.76435e-12	15.6379	600	6.233e-09
2102	3.81236e-12	15.6379	600	6.3123e-09
2104	3.8601e-12	15.6379	600	6.39118e-09
2106	3.90759e-12	15.6379	600	6.46963e-09
2108	3.95482e-12	15.6379	600	6.54765e-09
2110	4.00178e-12	15.6379	600	6.62524e-09
2112	4.04849e-12	15.6379	600	6.7024e-09
2114	4.09493e-12	15.6379	600	6.77912e-09
2116	4.14112e-12	15.6379	600	6.85542e-09
2118	4.18704e-12	15.6379	600	6.93128e-09
2120	4.2327e-12	15.6379	600	7.00671e-09
2122	4.27809e-12	15.6379	600	7.0817e-09
2124	4.32323e-12	15.6379	600	7.15627e-09
2126	4.3681e-12	15.6379	600	7.2304e-09
2128	4.41271e-12	15.6379	600	7.30409e-09
2130	4.45706e-12	15.6379	600	7.37735e-09
2132	4.50114e-12	15.6379	600	7.45017e-09
2134	4.54496e-12	15.6379	600	7.52256e-09
2136	4.58852e-12	15.6379	600	7.59451e-09
2138	4.63181e-12	15.6379	600	7.66603e-09
2140	4.67484e-12	15.6379	600	7.73711e-09
2142	4.7176e-12	15.6379	600	7.80775e-09
2144	4.7601e-12	15.6379	600	7.87796e-09
2146	4.80233e-12	15.6379	600	7.94773e-09
2148	4.8443e-12	15.6379	600	8.01706e-09
2150	4.88601e-12	15.6379	600	8.08595e-09
2152	4.92745e-12	15.6379	600	8.15441e-09
2154	4.96862e-12	15.6379	600	8.22242e-09
2156	5.00953e-12	15.6379	600	8.29e-09
2158	5.05017e-12	15.6379	600	8.35714e-09
2160	5.09055e-12	15.6379	600	8.42384e-09
2162	5.13066e-12	15.6379	600	8.4901e-09
2164	5.17051e-12	15.6379	600	8.55592e-09
2166	5.21009e-12	15.6379	600	8.6213e-09
2168	5.2494e-12	15.6379	600	8.68624e-09
2170	5.28845e-12	15.6379	600	8.75074e-09
2172	5.32723e-12	15.6379	600	8.8148e-09
2174	5.36574e-12	15.6379	600	8.87842e-09
2176	5.40399e-12	15.6379	600	8.9416e-09
2178	5.44197e-12	15.6379	600	9.00434e-09
2180	5.47968e-12	15.6379	600	9.06664e-09
2182	5.51713e-12	15.6379	600	9.12849e-09
2184	5.55431e-12	15.6379	600	9.18991e-09
2186	5.59122e-12	15.6379	600	9.25088e-09
2188	5.62787e-12	15.6379	600	9.31142e-09
2190	5.66425e-12	15.6379	600	9.37151e-09
2192	5.70036e-12	15.6379	600	9.43116e-09
2194	5.73621e-12	15.6379	600	9.49038e-09
2196	5.77179e-12	15.6379	600	9.54915e-09
2198	5.8071e-12	15.6379	600	9.60747e-09
2200	5.84215e-12	15.6379	600	9.66536e-09
2202	5.87693e-12	15.6379	600	9.72281e-09
2204	5.91144e-12	15.6379	600	9.77981e-09
2206	5.94568e-12	15.6379	600	9.83638e-09
2208	5.97966e-12	15.6379	600	9.8925e-09
2210	6.01337e-12	15.6379	600	9.94818e-09
2212	6.04681e-12	15.6379	600	1.00034e-08
2214	6.07999e-12	15.6379	600	1.00582e-08
2216	6.1129e-12	15.6379	600	1.01126e-08
2218	6.14554e-12	15.6379	600	1.01665e-08
2220	6.17792e-12	15.6379	600	1.022e-08
2222	6.21003e-12	15.6379	600	1.0273e-08
2224	6.24187e-12	15.6379	600	1.03256e-08
2226	6.27345e-12	15.6379	600	1.03778e-08
2228	6.30476e-12	15.6379	600	1.04295e-08
2230	6.33581e-12	15.6379	600	1.04808e-08
2232	6.36659e-12	15.6379	600	1.05316e-08
2234	6.3971e-12	15.6379	600	1.0582e-08
2236	6.42735e-12	15.6379	600	1.06319e-08
2238	6.45733e-12	15.6379	600	1.06815e-08
2240	6.48704e-12	15.6379	600	1.07305e-08
2242	6.51649e-12	15.6379	600	1.07792e-08
2244	6.54567e-12	15.6379	600	1.08274e-08
2246	6.57459e-12	15.6379	600	1.08751e-08
2248	6.60325e-12	15.6379	600	1.09225e-08
2250	6.63163e-12	15.6379	600	1.09694e-08
2252	6.65976e-12	15.6379	600	1.10158e-08
2254	6.68762e-12	15.6379	600	1.10618e-08
2256	6.71521e-12	15.6379	600	1.11074e-08
2258	6.74254e-12	15.6379	600	1.11525e-08
2260	6.76961e-12	15.6379	600	1.11972e-08
2262	6.79641e-12	15.6379	600	1.12415e-08
2264	6.82295e-12	15.6379	600	1.12853e-08
2266	6.84922e-12	15.6379	600	1.13287e-08
2268	6.87523e-12	15.6379	600	1.13717e-08
2270	6.90098e-12	15.6379	600	1.14142e-08
2272	6.92646e-12	15.6379	600	1.14563e-08
2274	6.95169e-12	15.6379	600	1.14979e-08
2276	6.97664e-12	15.6379	600	1.15391e-08
2278	7.00134e-12	15.6379	600	1.15799e-08
2280	7.02578e-12	15.6379	600	1.16203e-08
2282	7.04995e-12	15.6379	600	1.16602e-08
2284	7.07386e-12	15.6379	600	1.16997e-08
2286	7.09751e-12	15.6379	600	1.17387e-08
2288	7.1209e-12	15.6379	600	1.17774e-08
2290	7.14403e-12	15.6379	600	1.18156e-08
2292	7.16689e-12	15.6379	600	1.18533e-08
2294	7.1895e-12	15.6379	600	1.18907e-08
2296	7.21185e-12	15.6379	600	1.19276e-08
2298	7.23393e-12	15.6379	600	1.1964e-08
2300	7.25576e-12	15.6379	600	1.20001e-08
2302	7.27733e-12	15.6379	600	1.20357e-08
2304	7.29864e-12	15.6379	600	1.20709e-08
2306	7.31969e-12	15.6379	600	1.21056e-08
2308	7.34048e-12	15.6379	600	1.214e-08
2310	7.36101e-12	15.6379	600	1.21739e-08
2312	7.38129e-12	15.6379	600	1.22074e-08
2314	7.40131e-12	15.6379	600	1.22404e-08
2316	7.42107e-12	15.6379	600	1.2273e-08
2318	7.44058e-12	15.6379	600	1.23052e-08
2320	7.45983e-12	15.6379	600	1.2337e-08
2322	7.47882e-12	15.6379	600	1.23684e-08
2324	7.49756e-12	15.6379	600	1.23993e-08
2326	7.51604e-12	15.6379	600	1.24298e-08
2328	7.53426e-12	15.6379	600	1.24599e-08
2330	7.55224e-12	15.6379	600	1.24896e-08
2332	7.56995e-12	15.6379	600	1.25189e-08
2334	7.58742e-12	15.6379	600	1.25477e-08
2336	7.60463e-12	15.6379	600	1.25761e-08
2338	7.62159e-12	15.6379	600	1.26041e-08
2340	7.63829e-12	15.6379	600	1.26317e-08
2342	7.65474e-12	15.6379	600	1.26588e-08
2344	7.67094e-12	15.6379	600	1.26856e-08
2346	7.68689e-12	15.6379	600	1.27119e-08
2348	7.70259e-12	15.6379	600	1.27378e-08
2350	7.71804e-12	15.6379	600	1.27633e-08
2352	7.73323e-12	15.6379	600	1.27884e-08
2354	7.74818e-12	15.6379	600	1.28131e-08
2356	7.76288e-12	15.6379	600	1.28373e-08
2358	7.77732e-12	15.6379	600	1.28612e-08
2360	7.79152e-12	15.6379	600	1.28846e-08
2362	7.80547e-12	15.6379	600	1.29077e-08
2364	7.81918e-12	15.6379	600	1.29303e-08
2366	7.83263e-12	15.6379	600	1.29525e-08
2368	7.84584e-12	15.6379	600	1.29743e-08
2370	7.85881e-12	15.6379	600	1.29957e-08
2372	7.87152e-12	15.6379	600	1.30167e-08
2374	7.88399e-12	15.6379	600	1.30373e-08
2376	7.89622e-12	15.6379	600	1.30574e-08
2378	7.9082e-12	15.6379	600	1.30772e-08
2380	7.91994e-12	15.6379	600	1.30966e-08
2382	7.93144e-12	15.6379	600	1.31155e-08
2384	7.94269e-12	15.6379	600	1.31341e-08
2386	7.9537e-12	15.6379	600	1.31523e-08
2388	7.96446e-12	15.6379	600	1.317e-08
2390	7.97499e-12	15.6379	600	1.31874e-08
2392	7.98527e-12	15.6379	600	1.32044e-08
2394	7.99531e-12	15.6379	600	1.32209e-08
2396	8.00512e-12	15.6379	600	1.32371e-08
2398	8.01468e-12	15.6379	600	1.32529e-08
2400	8.024e-12	15.6379	600	1.32683e-08
2402	8.03309e-12	15.6379	600	1.32833e-08
2404	8.04194e-12	15.6379	600	1.32979e-08
2406	8.05055e-12	15.6379	600	1.33121e-08
2408	8.05892e-12	15.6379	600	1.33259e-08
2410	8.06706e-12	15.6379	600	1.33393e-08
2412	8.07496e-12	15.6379	600	1.33523e-08
2414	8.08263e-12	15.6379	600	1.3365e-08
2416	8.09006e-12	15.6379	600	1.33772e-08
2418	8.09726e-12	15.6379	600	1.33891e-08
2420	8.10422e-12	15.6379	600	1.34006e-08
2422	8.11095e-12	15.6379	600	1.34117e-08
2424	8.11745e-12	15.6379	600	1.34224e-08
2426	8.12372e-12	15.6379	600	1.34327e-08
2428	8.12975e-12	15.6379	600	1.34426e-08
2430	8.13555e-12	15.6379	600	1.34522e-08
2432	8.14113e-12	15.6379	600	1.34614e-08
2434	8.14647e-12	15.6379	600	1.34702e-08
2436	8.15159e-12	15.6379	600	1.34786e-08
2438	8.15648e-12	15.6379	600	1.34867e-08
2440	8.16113e-12	15.6379	600	1.34943e-08
2442	8.16557e-12	15.6379	600	1.35016e-08
2444	8.16977e-12	15.6379	600	1.35086e-08
2446	8.17375e-12	15.6379	600	1.35151e-08
2448	8.17751e-12	15.6379	600	1.35213e-08
2450	8.18104e-12	15.6379	600	1.35271e-08
2452	8.18434e-12	15.6379	600	1.35325e-08
2454	8.18742e-12	15.6379	600	1.35376e-08
2456	8.19028e-12	15.6379	600	1.35423e-08
2458	8.19292e-12	15.6379	600	1.35466e-08
2460	8.19534e-12	15.6379	600	1.35506e-08
2462	8.19753e-12	15.6379	600	1.35542e-08
2464	8.1995e-12	15.6379	600	1.35574e-08
2466	8.20126e-12	15.6379	600	1.35603e-08
2468	8.2028e-12	15.6379	600	1.35628e-08
2470	8.20411e-12	15.6379	600	1.3565e-08
2472	8.20521e-12	15.6379	600	1.35668e-08
2474	8.2061e-12	15.6379	600	1.35682e-08
2476	8.20676e-12	15.6379	600	1.35693e-08
2478	8.20721e-12	15.6379	600	1.357e-08
2480	8.20745e-12	15.6379	600	1.35703e-08
2482	8.20747e-12	15.6379	600	1.35704e-08
2484	8.20728e-12	15.6379	600	1.357e-08
2486	8.20687e-12	15.6379	600	1.35693e-08
2488	8.20626e-12	15.6379	600	1.35683e-08
2490	8.20543e-12	15.6379	600	1.35669e-08
2492	8.20439e-12	15.6379	600	1.35651e-08
2494	8.20314e-12	15.6379	600	1.3563e-08
2496	8.20168e-12	15.6379	600	1.35606e-08
2498	8.20001e-12	15.6379	600	1.35578e-08
2500	8.19813e-12	15.6379	600	1.35547e-08
2502	8.19605e-12	15.6379	600	1.35512e-08
2504	8.19376e-12	15.6379	600	1.35474e-08
2506	8.19126e-12	15.6379	600	1.35433e-08
2508	8.18856e-12	15.6379	600	1.35388e-08
2510	8.18566e-12	15.6379	600	1.35339e-08
2512	8.18255e-12	15.6379	600	1.35288e-08
2514	8.17923e-12	15.6379	600	1.35233e-08
2516	8.17572e-12	15.6379	600	1.35174e-08
2518	8.172e-12	15.6379	600	1.35113e-08
2520	8.16808e-12	15.6379	600	1.35048e-08
2522	8.16397e-12	15.6379	600	1.34979e-08
2524	8.15965e-12	15.6379	600	1.34908e-08
2526	8.15513e-12	15.6379	600	1.34833e-08
2528	8.15042e-12	15.6379	600	1.34755e-08
2530	8.14551e-12	15.6379	600	1.34673e-08
2532	8.1404e-12	15.6379	600	1.34589e-08
2534	8.1351e-12	15.6379	600	1.34501e-08
2536	8.1296e-12	15.6379	600	1.3441e-08
2538	8.12391e-12	15.6379	600	1.34315e-08
2540	8.11803e-12	15.6379	600	1.34218e-08
2542	8.11195e-12	15.6379	600	1.34117e-08
2544	8.10568e-12	15.6379	600	1.34013e-08
2546	8.09922e-12	15.6379	600	1.33906e-08
2548	8.09257e-12	15.6379	600	1.33796e-08
2550	8.08573e-12	15.6379	600	1.33683e-08
2552	8.0787e-12	15.6379	600	1.33566e-08
2554	8.07148e-12	15.6379	600	1.33447e-08
2556	8.06408e-12	15.6379	600	1.33324e-08
2558	8.05649e-12	15.6379	600	1.33199e-08
2560	8.04872e-12	15.6379	600	1.3307e-08
2562	8.04076e-12	15.6379	600	1.32938e-08
2564	8.03261e-12	15.6379	600	1.32803e-08
2566	8.02429e-12	15.6379	600	1.32665e-08
2568	8.01578e-12	15.6379	600	1.32525e-08
2570	8.00709e-12	15.6379	600	1.32381e-08
2572	7.99821e-12	15.6379	600	1.32234e-08
2574	7.98916e-12	15.6379	600	1.32084e-08
2576	7.97993e-12	15.6379	600	1.31931e-08
2578	7.97052e-12	15.6379	600	1.31775e-08
2580	7.96094e-12	15.6379	600	1.31617e-08
2582	7.95117e-12	15.6379	600	1.31455e-08
2584	7.94124e-12	15.6379	600	1.31291e-08
2586	7.93112e-12	15.6379	600	1.31123e-08
2588	7.92083e-12	15.6379	600	1.30953e-08
2590	7.91037e-12	15.6379	600	1.3078e-08
2592	7.89974e-12	15.6379	600	1.30604e-08
2594	7.88894e-12	15.6379	600	1.30425e-08
2596	7.87796e-12	15.6379	600	1.30244e-08
2598	7.86681e-12	15.6379	600	1.30059e-08
2600	7.8555e-12	15.6379	600	1.29872e-08
2602	7.84401e-12	15.6379	600	1.29682e-08
2604	7.83236e-12	15.6379	600	1.29489e-08
2606	7.82055e-12	15.6379	600	1.29294e-08
2608	7.80856e-12	15.6379	600	1.29095e-08
2610	7.79641e-12	15.6379	600	1.28894e-08
2612	7.7841e-12	15.6379	600	1.28691e-08
2614	7.77163e-12	15.6379	600	1.28484e-08
2616	7.75899e-12	15.6379	600	1.28275e-08
2618	7.74619e-12	15.6379	600	1.28063e-08
2620	7.73323e-12	15.6379	600	1.27849e-08
2622	7.72011e-12	15.6379	600	1.27632e-08
2624	7.70683e-12	15.6379	600	1.27412e-08
2626	7.6934e-12	15.6379	600	1.2719e-08
2628	7.6798e-12	15.6379	600	1.26965e-08
2630	7.66605e-12	15.6379	600	1.26738e-08
2632	7.65215e-12	15.6379	600	1.26507e-08
2634	7.63809e-12	15.6379	600	1.26275e-08
2636	7.62387e-12	15.6379	600	1.2604e-08
2638	7.60951e-12	15.6379	600	1.25802e-08
2640	7.59499e-12	15.6379	600	1.25562e-08
2642	7.58032e-12	15.6379	600	1.25319e-08
2644	7.5655e-12	15.6379	600	1.25074e-08
2646	7.55053e-12	15.6379	600	1.24827e-08
2648	7.53541e-12	15.6379	600	1.24576e-08
2650	7.52015e-12	15.6379	600	1.24324e-08
2652	7.50474e-12	15.6379	600	1.24069e-08
2654	7.48918e-12	15.6379	600	1.23812e-08
2656	7.47348e-12	15.6379	600	1.23552e-08
2658	7.45763e-12	15.6379	600	1.2329e-08
2660	7.44164e-12	15.6379	600	1.23025e-08
2662	7.42551e-12	15.6379	600	1.22759e-08
2664	7.40924e-12	15.6379	600	1.2249e-08
2666	7.39283e-12	15.6379	600	1.22218e-08
2668	7.37628e-12	15.6379	600	1.21944e-08
2670	7.35959e-12	15.6379	600	1.21668e-08
2672	7.34276e-12	15.6379	600	1.2139e-08
2674	7.32579e-12	15.6379	600	1.21109e-08
2676	7.30869e-12	15.6379	600	1.20827e-08
2678	7.29146e-12	15.6379	600	1.20541e-08
2680	7.27409e-12	15.6379	600	1.20254e-08
2682	7.25659e-12	15.6379	600	1.19965e-08
2684	7.23895e-12	15.6379	600	1.19673e-08
2686	7.22119e-12	15.6379	600	1.19379e-08
2688	7.20329e-12	15.6379	600	1.19083e-08
2690	7.18527e-12	15.6379	600	1.18785e-08
2692	7.16711e-12	15.6379	600	1.18485e-08
2694	7.14883e-12	15.6379	600	1.18183e-08
2696	7.13042e-12	15.6379	600	1.17878e-08
2698	7.11189e-12	15.6379	600	1.17572e-08
2700	7.09323e-12	15.6379	600	1.17263e-08
2702	7.07445e-12	15.6379	600	1.16952e-08
2704	7.05554e-12	15.6379	600	1.1664e-08
2706	7.03652e-12	15.6379	600	1.16325e-08
2708	7.01737e-12	15.6379	600	1.16008e-08
2710	6.9981e-12	15.6379	600	1.1569e-08
2712	6.97871e-12	15.6379	600	1.15369e-08
2714	6.9592e-12	15.6379	600	1.15047e-08
2716	6.93958e-12	15.6379	600	1.14722e-08
2718	6.91984e-12	15.6379	600	1.14396e-08
2720	6.89999e-12	15.6379	600	1.14067e-08
2722	6.88002e-12	15.6379	600	1.13737e-08
2724	6.85993e-12	15.6379	600	1.13405e-08
2726	6.83974e-12	15.6379	600	1.13071e-08
2728	6.81943e-12	15.6379	600	1.12735e-08
2730	6.79901e-12	15.6379	600	1.12398e-08
2732	6.77848e-12	15.6379	600	1.12058e-08
2734	6.75784e-12	15.6379	600	1.11717e-08
2736	6.7371e-12	15.6379	600	1.11374e-08
2738	6.71625e-12	15.6379	600	1.11029e-08
2740	6.69529e-12	15.6379	600	1.10682e-08
2742	6.67422e-12	15.6379	600	1.10334e-08
2744	6.65306e-12	15.6379	600	1.09984e-08
2746	6.63178e-12	15.6379	600	1.09632e-08
2748	6.61041e-12	15.6379	600	1.09279e-08
2750	6.58894e-12	15.6379	600	1.08924e-08
2752	6.56736e-12	15.6379	600	1.08567e-08
2754	6.54569e-12	15.6379	600	1.08209e-08
2756	6.52391e-12	15.6379	600	1.07849e-08
2758	6.50204e-12	15.6379	600	1.07487e-08
2760	6.48008e-12	15.6379	600	1.07124e-08
2762	6.45801e-12	15.6379	600	1.06759e-08
2764	6.43585e-12	15.6379	600	1.06393e-08
2766	6.4136e-12	15.6379	600	1.06025e-08
2768	6.39126e-12	15.6379	600	1.05655e-08
2770	6.36882e-12	15.6379	600	1.05284e-08
2772	6.3463e-12	15.6379	600	1.04912e-08
2774	6.32368e-12	15.6379	600	1.04538e-08
2776	6.30097e-12	15.6379	600	1.04162e-08
2778	6.27818e-12	15.6379	600	1.03785e-08
2780	6.2553e-12	15.6379	600	1.03407e-08
2782	6.23233e-12	15.6379	600	1.03027e-08
2784	6.20928e-12	15.6379	600	1.02646e-08
2786	6.18614e-12	15.6379	600	1.02264e-08
2788	6.16292e-12	15.6379	600	1.0188e-08
2790	6.13962e-12	15.6379	600	1.01494e-08
2792	6.11623e-12	15.6379	600	1.01108e-08
2794	6.09277e-12	15.6379	600	1.0072e-08
2796	6.06923e-12	15.6379	600	1.00331e-08
2798	6.04561e-12	15.6379	600	9.99399e-09
2800	6.02191e-12	15.6379	600	9.95481e-09
2802	5.99813e-12	15.6379	600	9.9155e-09
2804	5.97428e-12	15.6379	600	9.87606e-09
2806	5.95035e-12	15.6379	600	9.8365e-09
2808	5.92635e-12	15.6379	600	9.79682e-09
2810	5.90228e-12	15.6379	600	9.75702e-09
2812	5.87813e-12	15.6379	600	9.7171e-09
2814	5.85392e-12	15.6379	600	9.67706e-09
2816	5.82963e-12	15.6379	600	9.63691e-09
2818	5.80528e-12	15.6379	600	9.59664e-09
2820	5.78086e-12	15.6379	600	9.55626e-09
2822	5.75637e-12	15.6379	600	9.51577e-09
2824	5.73181e-12	15.6379	600	9.47517e-09
2826	5.70719e-12	15.6379	600	9.43447e-09
2828	5.68251e-12	15.6379	600	9.39366e-09
2830	5.65776e-12	15.6379	600	9.35274e-09
2832	5.63295e-12	15.6379	600	9.31172e-09
2834	5.60808e-12	15.6379	600	9.2706e-09
2836	5.58315e-12	15.6379	600	9.22938e-09
2838	5.55816e-12	15.6379	600	9.18806e-09
2840	5.53311e-12	15.6379	600	9.14665e-09
2842	5.508e-12	15.6379	600	9.10514e-09
2844	5.48284e-12	15.6379	600	9.06354e-09
2846	5.45762e-12	15.6379	600	9.02184e-09
2848	5.43235e-12	15.6379	600	8.98006e-09
2850	5.40702e-12	15.6379	600	8.93819e-09
2852	5.38164e-12	15.6379	600	8.89623e-09
2854	5.35621e-12	15.6379	600	8.85418e-09
2856	5.33073e-12	15.6379	600	8.81205e-09
2858	5.3052e-12	15.6379	600	8.76984e-09
2860	5.27962e-12	15.6379	600	8.72755e-09
2862	5.25399e-12	15.6379	600	8.68518e-09
2864	5.22831e-12	15.6379	600	8.64273e-09
2866	5.20259e-12	15.6379	600	8.60021e-09
2868	5.17683e-12	15.6379	600	8.55761e-09
2870	5.15102e-12	15.6379	600	8.51494e-09
2872	5.12516e-12	15.6379	600	8.4722e-09
2874	5.09927e-12	15.6379	600	8.42938e-09
2876	5.07333e-12	15.6379	600	8.3865e-09
2878	5.04735e-12	15.6379	600	8.34356e-09
2880	5.02134e-12	15.6379	600	8.30055e-09
2882	4.99528e-12	15.6379	600	8.25747e-09
2884	4.96919e-12	15.6379	600	8.21433e-09
2886	4.94306e-12	15.6379	600	8.17114e-09
2888	4.9169e-12	15.6379	600	8.12788e-09
2890	4.8907e-12	15.6379	600	8.08457e-09
2892	4.86447e-12	15.6379	600	8.0412e-09
2894	4.8382e-12	15.6379	600	7.99778e-09
2896	4.8119e-12	15.6379	600	7.9543e-09
2898	4.78558e-12	15.6379	600	7.91078e-09
2900	4.75922e-12	15.6379	600	7.8672e-09
2902	4.73283e-12	15.6379	600	7.82358e-09
2904	4.70642e-12	15.6379	600	7.77991e-09
2906	4.67997e-12	15.6379	600	7.73619e-09
2908	4.65351e-12	15.6379	600	7.69244e-09
2910	4.62701e-12	15.6379	600	7.64864e-09
2912	4.6005e-12	15.6379	600	7.6048e-09
2914	4.57395e-12	15.6379	600	7.56092e-09
2916	4.54739e-12	15.6379	600	7.51701e-09
2918	4.52081e-12	15.6379	600	7.47306e-09
2920	4.4942e-12	15.6379	600	7.42907e-09
2922	4.46758e-12	15.6379	600	7.38506e-09
2924	4.44093e-12	15.6379	600	7.34101e-09
2926	4.41427e-12	15.6379	600	7.29693e-09
2928	4.38759e-12	15.6379	600	7.25283e-09
2930	4.3609e-12	15.6379	600	7.2087e-09
2932	4.33419e-12	15.6379	600	7.16454e-09
2934	4.30746e-12	15.6379	600	7.12036e-09
2936	4.28073e-12	15.6379	600	7.07616e-09
2938	4.25398e-12	15.6379	600	7.03194e-09
2940	4.22722e-12	15.6379	600	6.98771e-09
2942	4.20045e-12	15.6379	600	6.94345e-09
2944	4.17367e-12	15.6379	600	6.89918e-09
2946	4.14688e-12	15.6379	600	6.85489e-09
2948	4.12008e-12	15.6379	600	6.81059e-09
2950	4.09328e-12	15.6379	600	6.76628e-09
2952	4.06647e-12	15.6379	600	6.72196e-09
2954	4.03966e-12	15.6379	600	6.67764e-09
2956	4.01284e-12	15.6379	600	6.6333e-09
2958	3.98602e-12	15.6379	600	6.58896e-09
2960	3.9592e-12	15.6379	600	6.54462e-09
2962	3.93237e-12	15.6379	600	6.50028e-09
2964	3.90555e-12	15.6379	600	6.45593e-09
2966	3.87872e-12	15.6379	600	6.41159e-09
2968	3.8519e-12	15.6379	600	6.36725e-09
2970	3.82508e-12	15.6379	600	6.32291e-09
2972	3.79826e-12	15.6379	600	6.27858e-09
2974	3.77145e-12	15.6379	600	6.23425e-09
2976	3.74464e-12	15.6379	600	6.18993e-09
2978	3.71784e-12	15.6379	600	6.14562e-09
2980	3.69104e-12	15.6379	600	6.10133e-09
2982	3.66425e-12	15.6379	600	6.05704e-09
2984	3.63747e-12	15.6379	600	6.01277e-09
2986	3.6107e-12	15.6379	600	5.96852e-09
2988	3.58394e-12	15.6379	600	5.92428e-09
2990	3.5572e-12	15.6379	600	5.88006e-09
2992	3.53046e-12	15.6379	600	5.83586e-09
2994	3.50373e-12	15.6379	600	5.79169e-09
2996	3.47702e-12	15.6379	600	5.74753e-09
2998	3.45033e-12	15.6379	600	5.7034e-09
3000	3.42365e-12	15.6379	600	5.6593e-09
3002	3.39699e-12	15.6379	600	5.61522e-09
3004	3.37034e-12	15.6379	600	5.57117e-09
3006	3.34371e-12	15.6379	600	5.52715e-09
3008	3.3171e-12	15.6379	600	5.48317e-09
3010	3.29051e-12	15.6379	600	5.43921e-09
3012	3.26395e-12	15.6379	600	5.39529e-09
3014	3.2374e-12	15.6379	600	5.35141e-09
3016	3.21088e-12	15.6379	600	5.30756e-09
3018	3.18437e-12	15.6379	600	5.26376e-09
3020	3.1579e-12	15.6379	600	5.21999e-09
3022	3.13145e-12	15.6379	600	5.17626e-09
3024	3.10502e-12	15.6379	600	5.13258e-09
3026	3.07862e-12	15.6379	600	5.08894e-09
3028	3.05225e-12	15.6379	600	5.04534e-09
3030	3.02591e-12	15.6379	600	5.00179e-09
3032	2.99959e-12	15.6379	600	4.9583e-09
3034	2.97331e-12	15.6379	600	4.91485e-09
3036	2.94706e-12	15.6379	600	4.87145e-09
3038	2.92083e-12	15.6379	600	4.8281e-09
3040	2.89465e-12	15.6379	600	4.78481e-09
3042	2.86849e-12	15.6379	600	4.74158e-09
3044	2.84237e-12	15.6379	600	4.6984e-09
3046	2.81628e-12	15.6379	600	4.65527e-09
3048	2.79023e-12	15.6379	600	4.61221e-09
3050	2.76422e-12	15.6379	600	4.56921e-09
3052	2.73824e-12	15.6379	600	4.52627e-09
3054	2.71231e-12	15.6379	600	4.48339e-09
3056	2.68641e-12	15.6379	600	4.44058e-09
3058	2.66055e-12	15.6379	600	4.39783e-09
3060	2.63473e-12	15.6379	600	4.35516e-09
3062	2.60895e-12	15.6379	600	4.31255e-09
3064	2.58322e-12	15.6379	600	4.27001e-09
3066	2.55753e-12	15.6379	600	4.22754e-09
3068	2.53188e-12	15.6379	600	4.18514e-09
3070	2.50628e-12	15.6379	600	4.14282e-09
3072	2.48072e-12	15.6379	600	4.10058e-09
3074	2.45521e-12	15.6379	600	4.05841e-09
3076	2.42975e-12	15.6379	600	4.01631e-09
3078	2.40433e-12	15.6379	600	3.9743e-09
3080	2.37897e-12	15.6379	600	3.93237e-09
3082	2.35365e-12	15.6379	600	3.89052e-09
3084	2.32838e-12	15.6379	600	3.84875e-09
3086	2.30317e-12	15.6379	600	3.80707e-09
3088	2.278e-12	15.6379	600	3.76547e-09
3090	2.25289e-12	15.6379	600	3.72396e-09
3092	2.22783e-12	15.6379	600	3.68254e-09
3094	2.20283e-12	15.6379	600	3.6412e-09
3096	2.17788e-12	15.6379	600	3.59996e-09
3098	2.15298e-12	15.6379	600	3.55881e-09
3100	2.12814e-12	15.6379	600	3.51775e-09
3102	2.10336e-12	15.6379	600	3.47679e-09
3104	2.07864e-12	15.6379	600	3.43592e-09
3106	2.05397e-12	15.6379	600	3.39515e-09
3108	2.02937e-12	15.6379	600	3.35448e-09
3110	2.00482e-12	15.6379	600	3.3139e-09
3112	1.98034e-12	15.6379	600	3.27343e-09
3114	1.95592e-12	15.6379	600	3.23306e-09
3116	1.93156e-12	15.6379	600	3.19279e-09
3118	1.90726e-12	15.6379	600	3.15263e-09
3120	1.88302e-12	15.6379	600	3.11257e-09
3122	1.85885e-12	15.6379	600	3.07261e-09
3124	1.83475e-12	15.6379	600	3.03277e-09
3126	1.81071e-12	15.6379	600	2.99303e-09
3128	1.78674e-12	15.6379	600	2.95341e-09
3130	1.76283e-12	15.6379	600	2.91389e-09
3132	1.739e-12	15.6379	600	2.87449e-09
3134	1.71523e-12	15.6379	600	2.8352e-09
3136	1.69153e-12	15.6379	600	2.79603e-09
3138	1.6679e-12	15.6379	600	2.75697e-09
3140	1.64434e-12	15.6379	600	2.71803e-09
3142	1.62085e-12	15.6379	600	2.6792e-09
3144	1.59744e-12	15.6379	600	2.6405e-09
3146	1.5741e-12	15.6379	600	2.60191e-09
3148	1.55083e-12	15.6379	600	2.56345e-09
3150	1.52763e-12	15.6379	600	2.52511e-09
3152	1.50452e-12	15.6379	600	2.48689e-09
3154	1.48147e-12	15.6379	600	2.4488e-09
3156	1.4585e-12	15.6379	600	2.41084e-09
3158	1.43561e-12	15.6379	600	2.373e-09
3160	1.4128e-12	15.6379	600	2.33529e-09
3162	1.39006e-12	15.6379	600	2.29771e-09
3164	1.36741e-12	15.6379	600	2.26026e-09
3166	1.34483e-12	15.6379	600	2.22294e-09
3168	1.32233e-12	15.6379	600	2.18575e-09
3170	1.29991e-12	15.6379	600	2.14869e-09
3172	1.27758e-12	15.6379	600	2.11177e-09
3174	1.25533e-12	15.6379	600	2.07499e-09
3176	1.23315e-12	15.6379	600	2.03834e-09
3178	1.21107e-12	15.6379	600	2.00183e-09
3180	1.18906e-12	15.6379	600	1.96546e-09
3182	1.16714e-12	15.6379	600	1.92923e-09
3184	1.14531e-12	15.6379	600	1.89314e-09
3186	1.12356e-12	15.6379	600	1.85719e-09
3188	1.1019e-12	15.6379	600	1.82138e-09
3190	1.08032e-12	15.6379	600	1.78572e-09
3192	1.05884e-12	15.6379	600	1.7502e-09
3194	1.03744e-12	15.6379	600	1.71483e-09
3196	1.01612e-12	15.6379	600	1.6796e-09
3198	9.94902e-13	15.6379	600	1.64452e-09
3200	9.7377e-13	15.6379	600	1.60959e-09
3202	9.52729e-13	15.6379	600	1.57481e-09
3204	9.31778e-13	15.6379	600	1.54018e-09
3206	9.10919e-13	15.6379	600	1.5057e-09
3208	8.90152e-13	15.6379	600	1.47137e-09
3210	8.69478e-13	15.6379	600	1.4372e-09
3212	8.48897e-13	15.6379	600	1.40318e-09
3214	8.2841e-13	15.6379	600	1.36932e-09
3216	8.08017e-13	15.6379	600	1.33561e-09
3218	7.87719e-13	15.6379	600	1.30206e-09
3220	7.67516e-13	15.6379	600	1.26866e-09
3222	7.4741e-13	15.6379	600	1.23543e-09
3224	7.274e-13	15.6379	600	1.20235e-09
3226	7.07487e-13	15.6379	600	1.16944e-09
3228	6.87672e-13	15.6379	600	1.13669e-09
3230	6.67955e-13	15.6379	600	1.10409e-09
3232	6.48336e-13	15.6379	600	1.07167e-09
3234	6.28817e-13	15.6379	600	1.0394e-09
3236	6.09397e-13	15.6379	600	1.0073e-09
3238	5.90078e-13	15.6379	600	9.75368e-10
3240	5.70859e-13	15.6379	600	9.436e-10
3242	5.51741e-13	15.6379	600	9.12e-10
3244	5.32725e-13	15.6379	600	8.80568e-10
3246	5.13811e-13	15.6379	600	8.49304e-10
3248	4.95e-13	15.6379	600	8.18211e-10
3250	4.76291e-13	15.6379	600	7.87287e-10
3252	4.57687e-13	15.6379	600	7.56535e-10
3254	4.39186e-13	15.6379	600	7.25955e-10
3256	4.2079e-13	15.6379	600	6.95548e-10
3258	4.02499e-13	15.6379	600	6.65314e-10
3260	3.84313e-13	15.6379	600	6.35255e-10
3262	3.66234e-13	15.6379	600	6.0537e-10
3264	3.4826e-13	15.6379	600	5.75661e-10
3266	3.30394e-13	15.6379	600	5.46129e-10
3268	3.12634e-13	15.6379	600	5.16775e-10
3270	2.94982e-13	15.6379	600	4.87598e-10
3272	2.77439e-13	15.6379	600	4.58599e-10
3274	2.60004e-13	15.6379	600	4.29781e-10
3276	2.42677e-13	15.6379	600	4.01142e-10
3278	2.25461e-13	15.6379	600	3.72684e-10
3280	2.08353e-13	15.6379	600	3.44407e-10
3282	1.91356e-13	15.6379	600	3.16313e-10
3284	1.7447e-13	15.6379	600	2.88401e-10
3286	1.57695e-13	15.6379	600	2.60673e-10
3288	1.44355e-13	15.6379	600	2.38624e-10
3290	1.44003e-13	15.6379	600	2.38042e-10
3292	1.43651e-13	15.6379	600	2.37459e-10
3294	1.43298e-13	15.6379	600	2.36877e-10
3296	1.42946e-13	15.6379	600	2.36294e-10
3298	1.42594e-13	15.6379	600	2.35712e-10
3300	1.42241e-13	15.6379	600	2.35129e-10
3302	1.41889e-13	15.6379	600	2.34547e-10
3304	1.41536e-13	15.6379	600	2.33964e-10
3306	1.41184e-13	15.6379	600	2.33382e-10
3308	1.40832e-13	15.6379	600	2.32799e-10
3310	1.40479e-13	15.6379	600	2.32217e-10
3312	1.40127e-13	15.6379	600	2.31635e-10
3314	1.39775e-13	15.6379	600	2.31052e-10
3316	1.39422e-13	15.6379	600	2.3047e-10
3318	1.3907e-13	15.6379	600	2.29887e-10
3320	1.38718e-13	15.6379	600	2.29305e-10
3322	1.38365e-13	15.6379	600	2.28722e-10
3324	1.38013e-13	15.6379	600	2.2814e-10
3326	1.3766e-13	15.6379	600	2.27557e-10
3328	1.37308e-13	15.6379	600	2.26975e-10
3330	1.36956e-13	15.6379	600	2.26392e-10
3332	1.36603e-13	15.6379	600	2.2581e-10
3334	1.36251e-13	15.6379	600	2.25227e-10
3336	1.35899e-13	15.6379	600	2.24645e-10
3338	1.35546e-13	15.6379	600	2.24062e-10
3340	1.35194e-13	15.6379	600	2.2348e-10
3342	1.34842e-13	15.6379	600	2.22897e-10
3344	1.34489e-13	15.6379	600	2.22315e-10
3346	1.34137e-13	15.6379	600	2.21733e-10
3348	1.33784e-13	15.6379	600	2.2115e-10
3350	1.33432e-13	15.6379	600	2.20568e-10
3352	1.3308e-13	15.6379	600	2.19985e-10
3354	1.32727e-13	15.6379	600	2.19403e-10
3356	1.32375e-13	15.6379	600	2.1882e-10
3358	1.32023e-13	15.6379	600	2.18238e-10
3360	1.3167e-13	15.6379	600	2.17655e-10
3362	1.31318e-13	15.6379	600	2.17073e-10
3364	1.30966e-13	15.6379	600	2.1649e-10
3366	1.30613e-13	15.6379	600	2.15908e-10
3368	1.30261e-13	15.6379	600	2.15325e-10
3370	1.29908e-13	15.6379	600	2.14743e-10
3372	1.29556e-13	15.6379	600	2.1416e-10
3374	1.29204e-13	15.6379	600	2.13578e-10
3376	1.28851e-13	15.6379	600	2.12996e-10
3378	1.28499e-13	15.6379	600	2.12413e-10
3380	1.28147e-13	15.6379	600	2.11831e-10
3382	1.27794e-13	15.6379	600	2.11248e-10
3384	1.27442e-13	15.6379	600	2.10666e-10
3386	1.2709e-13	15.6379	600	2.10083e-10
3388	1.26737e-13	15.6379	600	2.09501e-10
3390	1.26385e-13	15.6379	600	2.08918e-10
3392	1.26032e-13	15.6379	600	2.08336e-10
3394	1.2568e-13	15.6379	600	2.07753e-10
3396	1.25328e-13	15.6379	600	2.07171e-10
3398	1.24975e-13	15.6379	600	2.06588e-10
3400	1.24623e-13	15.6379	600	2.06006e-10
3402	1.24271e-13	15.6379	600	2.05423e-10
3404	1.23918e-13	15.6379	600	2.04841e-10
3406	1.23566e-13	15.6379	600	2.04258e-10
3408	1.23214e-13	15.6379	600	2.03676e-10
3410	1.22861e-13	15.6379	600	2.03094e-10
3412	1.22509e-13	15.6379	600	2.02511e-10
3414	1.22156e-13	15.6379	600	2.01929e-10
3416	1.21804e-13	15.6379	600	2.01346e-10
3418	1.21452e-13	15.6379	600	2.00764e-10
3420	1.21099e-13	15.6379	600	2.00181e-10
3422	1.20747e-13	15.6379	600	1.99599e-10
3424	1.20395e-13	15.6379	600	1.99016e-10
3426	1.20042e-13	15.6379	600	1.98434e-10
3428	1.1969e-13	15.6379	600	1.97851e-10
3430	1.19338e-13	15.6379	600	1.97269e-10
3432	1.18985e-13	15.6379	600	1.96686e-10
3434	1.18633e-13	15.6379	600	1.96104e-10
3436	1.1828e-13	15.6379	600	1.95521e-10
3438	1.17928e-13	15.6379	600	1.94939e-10
3440	1.17576e-13	15.6379	600	1.94356e-10
3442	1.17223e-13	15.6379	600	1.93774e-10
3444	1.16871e-13	15.6379	600	1.93192e-10
3446	1.16519e-13	15.6379	600	1.92609e-10
3448	1.16166e-13	15.6379	600	1.92027e-10
3450	1.15814e-13	15.6379	600	1.91444e-10
3452	1.15462e-13	15.6379	600	1.90862e-10
3454	1.15109e-13	15.6379	600	1.90279e-10
3456	1.14757e-13	15.6379	600	1.89697e-10
3458	1.14404e-13	15.6379	600	1.89114e-10
3460	1.14052e-13	15.6379	600	1.88532e-10
3462	1.137e-13	15.6379	600	1.87949e-10
3464	1.13347e-13	15.6379	600	1.87367e-10
3466	1.12995e-13	15.6379	600	1.86784e-10
3468	1.12643e-13	15.6379	600	1.86202e-10
3470	1.1229e-13	15.6379	600	1.85619e-10
3472	1.11938e-13	15.6379	600	1.85037e-10
3474	1.11585e-13	15.6379	600	1.84455e-10
3476	1.11233e-13	15.6379	600	1.83872e-10
3478	1.10881e-13	15.6379	600	1.8329e-10
3480	1.10528e-13	15.6379	600	1.82707e-10
3482	1.10176e-13	15.6379	600	1.82125e-10
3484	1.09824e-13	15.6379	600	1.81542e-10
3486	1.09471e-13	15.6379	600	1.8096e-10
3488	1.09119e-13	15.6379	600	1.80377e-10
3490	1.08767e-13	15.6379	600	1.79795e-10
3492	1.08414e-13	15.6379	600	1.79212e-10
3494	1.08062e-13	15.6379	600	1.7863e-10
3496	1.07709e-13	15.6379	600	1.78047e-10
3498	1.07357e-13	15.6379	600	1.77465e-10
3500	1.07005e-13	15.6379	600	1.76882e-10
3502	1.06652e-13	15.6379	600	1.763e-10
3504	1.063e-13	15.6379	600	1.75717e-10
3506	1.05948e-13	15.6379	600	1.75135e-10
3508	1.05595e-13	15.6379	600	1.74553e-10
3510	1.05243e-13	15.6379	600	1.7397e-10
3512	1.04891e-13	15.6379	600	1.73388e-10
3514	1.04538e-13	15.6379	600	1.72805e-10
3516	1.04186e-13	15.6379	600	1.72223e-10
3518	1.03833e-13	15.6379	600	1.7164e-10
3520	1.03481e-13	15.6379	600	1.71058e-10
3522	1.03129e-13	15.6379	600	1.70475e-10
3524	1.02776e-13	15.6379	600	1.69893e-10
3526	1.02424e-13	15.6379	600	1.6931e-10
3528	1.02072e-13	15.6379	600	1.68728e-10
3530	1.01719e-13	15.6379	600	1.68145e-10
3532	1.01367e-13	15.6379	600	1.67563e-10
3534	1.01015e-13	15.6379	600	1.6698e-10
3536	1.00662e-13	15.6379	600	1.66398e-10
3538	1.0031e-13	15.6379	600	1.65815e-10
3540	9.99575e-14	15.6379	600	1.65233e-10
3542	9.96051e-14	15.6379	600	1.64651e-10
3544	9.92528e-14	15.6379	600	1.64068e-10
3546	9.89004e-14	15.6379	600	1.63486e-10
3548	9.8548e-14	15.6379	600	1.62903e-10
3550	9.81957e-14	15.6379	600	1.62321e-10
3552	9.78433e-14	15.6379	600	1.61738e-10
3554	9.74909e-14	15.6379	600	1.61156e-10
3556	9.71386e-14	15.6379	600	1.60573e-10
3558	9.67862e-14	15.6379	600	1.59991e-10
3560	9.64338e-14	15.6379	600	1.59408e-10
3562	9.60815e-14	15.6379	600	1.58826e-10
3564	9.57291e-14	15.6379	600	1.58243e-10
3566	9.53768e-14	15.6379	600	1.57661e-10
3568	9.50244e-14	15.6379	600	1.57078e-10
3570	9.4672e-14	15.6379	600	1.56496e-10
3572	9.43197e-14	15.6379	600	1.55914e-10
3574	9.39673e-14	15.6379	600	1.55331e-10
3576	9.36149e-14	15.6379	600	1.54749e-10
3578	9.32626e-14	15.6379	600	1.54166e-10
3580	9.29102e-14	15.6379	600	1.53584e-10
3582	9.25578e-14	15.6379	600	1.53001e-10
3584	9.22055e-14	15.6379	600	1.52419e-10
3586	9.18531e-14	15.6379	600	1.51836e-10
3588	9.15007e-14	15.6379	600	1.51254e-10
3590	9.11484e-14	15.6379	600	1.50671e-10
3592	9.0796e-14	15.6379	600	1.50089e-10
3594	9.04437e-14	15.6379	600	1.49506e-10
3596	9.00913e-14	15.6379	600	1.48924e-10
3598	8.97389e-14	15.6379	600	1.48341e-10
3600	8.93866e-14	15.6379	600	1.47759e-10
3602	8.90342e-14	15.6379	600	1.47176e-10
3604	8.86818e-14	15.6379	600	1.46594e-10
3606	8.83295e-14	15.6379	600	1.46012e-10
3608	8.79771e-14	15.6379	600	1.45429e-10
3610	8.76247e-14	15.6379	600	1.44847e-10
3612	8.72724e-14	15.6379	600	1.44264e-10
3614	8.692e-14	15.6379	600	1.43682e-10
3616	8.65676e-14	15.6379	600	1.43099e-10
3618	8.62153e-14	15.6379	600	1.42517e-10
3620	8.58629e-14	15.6379	600	1.41934e-10
3622	8.55106e-14	15.6379	600	1.41352e-10
3624	8.51582e-14	15.6379	600	1.40769e-10
3626	8.48058e-14	15.6379	600	1.40187e-10
3628	8.44535e-14	15.6379	600	1.39604e-10
3630	8.41011e-14	15.6379	600	1.39022e-10
3632	8.37487e-14	15.6379	600	1.38439e-10
3634	8.33964e-14	15.6379	600	1.37857e-10
3636	8.3044e-14	15.6379	600	1.37274e-10
3638	8.26916e-14	15.6379	600	1.36692e-10
3640	8.23393e-14	15.6379	600	1.3611e-10
3642	8.19869e-14	15.6379	600	1.35527e-10
3644	8.16346e-14	15.6379	600	1.34945e-10
3646	8.12822e-14	15.6379	600	1.34362e-10
3648	8.09298e-14	15.6379	600	1.3378e-10
3650	8.05775e-14	15.6379	600	1.33197e-10
3652	8.02251e-14	15.6379	600	1.32615e-10
3654	7.98727e-14	15.6379	600	1.32032e-10
3656	7.95204e-14	15.6379	600	1.3145e-10
3658	7.9168e-14	15.6379	600	1.30867e-10
3660	7.88156e-14	15.6379	600	1.30285e-10
3662	7.84633e-14	15.6379	600	1.29702e-10
3664	7.81109e-14	15.6379	600	1.2912e-10
3666	7.77585e-14	15.6379	600	1.28537e-10
3668	7.74062e-14	15.6379	600	1.27955e-10
3670	7.70538e-14	15.6379	600	1.27373e-10
3672	7.67015e-14	15.6379	600	1.2679e-10
3674	7.63491e-14	15.6379	600	1.26208e-10
3676	7.59967e-14	15.6379	600	1.25625e-10
3678	7.56444e-14	15.6379	600	1.25043e-10
3680	7.5292e-14	15.6379	600	1.2446e-10
3682	7.49396e-14	15.6379	600	1.23878e-10
3684	7.45873e-14	15.6379	600	1.23295e-10
3686	7.42349e-14	15.6379	600	1.22713e-10
3688	7.38825e-14	15.6379	600	1.2213e-10
3690	7.35302e-14	15.6379	600	1.21548e-10
3692	7.31778e-14	15.6379	600	1.20965e-10
3694	7.28254e-14	15.6379	600	1.20383e-10
3696	7.24731e-14	15.6379	600	1.198e-10
3698	7.21207e-14	15.6379	600	1.19218e-10
3700	7.17684e-14	15.6379	600	1.18635e-10
3702	7.1416e-14	15.6379	600	1.18053e-10
3704	7.10636e-14	15.6379	600	1.17471e-10
3706	7.07113e-14	15.6379	600	1.16888e-10
3708	7.03589e-14	15.6379	600	1.16306e-10
3710	7.00065e-14	15.6379	600	1.15723e-10
3712	6.96542e-14	15.6379	600	1.15141e-10
3714	6.93018e-14	15.6379	600	1.14558e-10
3716	6.89494e-14	15.6379	600	1.13976e-10
3718	6.85971e-14	15.6379	600	1.13393e-10
3720	6.82447e-14	15.6379	600	1.12811e-10
3722	6.78924e-14	15.6379	600	1.12228e-10
3724	6.754e-14	15.6379	600	1.11646e-10
3726	6.71876e-14	15.6379	600	1.11063e-10
3728	6.68353e-14	15.6379	600	1.10481e-10
3730	6.64829e-14	15.6379	600	1.09898e-10
3732	6.61305e-14	15.6379	600	1.09316e-10
3734	6.57782e-14	15.6379	600	1.08733e-10
3736	6.54258e-14	15.6379	600	1.08151e-10
3738	6.50734e-14	15.6379	600	1.07569e-10
3740	6.47211e-14	15.6379	600	1.06986e-10
3742	6.43687e-14	15.6379	600	1.06404e-10
3744	6.40163e-14	15.6379	600	1.05821e-10
3746	6.3664e-14	15.6379	600	1.05239e-10
3748	6.33116e-14	15.6379	600	1.04656e-10
3750	6.29593e-14	15.6379	600	1.04074e-10
3752	6.26069e-14	15.6379	600	1.03491e-10
3754	6.22545e-14	15.6379	600	1.02909e-10
3756	6.19022e-14	15.6379	600	1.02326e-10
3758	6.15498e-14	15.6379	600	1.01744e-10
3760	6.11974e-14	15.6379	600	1.01161e-10
3762	6.08451e-14	15.6379	600	1.00579e-10
3764	6.04927e-14	15.6379	600	9.99964e-11
3766	6.01403e-14	15.6379	600	9.9414e-11
3768	5.9788e-14	15.6379	600	9.88315e-11
3770	5.94356e-14	15.6379	600	9.8249e-11
3772	5.90833e-14	15.6379	600	9.76666e-11
3774	5.87309e-14	15.6379	600	9.70841e-11
3776	5.83785e-14	15.6379	600	9.65016e-11
3778	5.80262e-14	15.6379	600	9.59192e-11
3780	5.76738e-14	15.6379	600	9.53367e-11
3782	5.73214e-14	15.6379	600	9.47542e-11
3784	5.69691e-14	15.6379	600	9.41717e-11
3786	5.66167e-14	15.6379	600	9.35893e-11
3788	5.62643e-14	15.6379	600	9.30068e-11
3790	5.5912e-14	15.6379	600	9.24243e-11
3792	5.55596e-14	15.6379	600	9.18419e-11
3794	5.52072e-14	15.6379	600	9.12594e-11
3796	5.48549e-14	15.6379	600	9.06769e-11
3798	5.45025e-14	15.6379	600	9.00945e-11
3800	5.41502e-14	15.6379	600	8.9512e-11
3802	5.37978e-14	15.6379	600	8.89295e-11
3804	5.34454e-14	15.6379	600	8.83471e-11
3806	5.30931e-14	15.6379	600	8.77646e-11
3808	5.27407e-14	15.6379	600	8.71821e-11
3810	5.23883e-14	15.6379	600	8.65996e-11
3812	5.2036e-14	15.6379	600	8.60172e-11
3814	5.16836e-14	15.6379	600	8.54347e-11
3816	5.13312e-14	15.6379	600	8.48522e-11
3818	5.09789e-14	15.6379	600	8.42698e-11
3820	5.06265e-14	15.6379	600	8.36873e-11
3822	5.02741e-14	15.6379	600	8.31048e-11
3824	4.99218e-14	15.6379	600	8.25224e-11
3826	4.95694e-14	15.6379	600	8.19399e-11
3828	4.92171e-14	15.6379	600	8.13574e-11
3830	4.88647e-14	15.6379	600	8.0775e-11
3832	4.85123e-14	15.6379	600	8.01925e-11
3834	4.816e-14	15.6379	600	7.961e-11
3836	4.78076e-14	15.6379	600	7.90275e-11
3838	4.74552e-14	15.6379	600	7.84451e-11
3840	4.71029e-14	15.6379	600	7.78626e-11
3842	4.67505e-14	15.6379	600	7.72801e-11
3844	4.63981e-14	15.6379	600	7.66977e-11
3846	4.60458e-14	15.6379	600	7.61152e-11
3848	4.56934e-14	15.6379	600	7.55327e-11
3850	4.53411e-14	15.6379	600	7.49503e-11
3852	4.49887e-14	15.6379	600	7.43678e-11
3854	4.46363e-14	15.6379	600	7.37853e-11
3856	4.4284e-14	15.6379	600	7.32028e-11
3858	4.39316e-14	15.6379	600	7.26204e-11
3860	4.35792e-14	15.6379	600	7.20379e-11
3862	4.32269e-14	15.6379	600	7.14554e-11
3864	4.28745e-14	15.6379	600	7.0873e-11
3866	4.25221e-14	15.6379	600	7.02905e-11
3868	4.21698e-14	15.6379	600	6.9708e-11
3870	4.18174e-14	15.6379	600	6.91256e-11
3872	4.1465e-14	15.6379	600	6.85431e-11
3874	4.11127e-14	15.6379	600	6.79606e-11
3876	4.07603e-14	15.6379	600	6.73782e-11
3878	4.0408e-14	15.6379	600	6.67957e-11
3880	4.00556e-14	15.6379	600	6.62132e-11
3882	3.97032e-14	15.6379	600	6.56307e-11
3884	3.93509e-14	15.6379	600	6.50483e-11
3886	3.89985e-14	15.6379	600	6.44658e-11
3888	3.86461e-14	15.6379	600	6.38833e-11
3890	3.82938e-14	15.6379	600	6.33009e-11
3892	3.79414e-14	15.6379	600	6.27184e-11
3894	3.7589e-14	15.6379	600	6.21359e-11
3896	3.72367e-14	15.6379	600	6.15535e-11
3898	3.68843e-14	15.6379	600	6.0971e-11
3900	3.65319e-14	15.6379	600	6.03885e-11
3902	3.61796e-14	15.6379	600	5.9806e-11
3904	3.58272e-14	15.6379	600	5.92236e-11
3906	3.54749e-14	15.6379	600	5.86411e-11
3908	3.51225e-14	15.6379	600	5.80586e-11
3910	3.47701e-14	15.6379	600	5.74762e-11
3912	3.44178e-14	15.6379	600	5.68937e-11
3914	3.40654e-14	15.6379	600	5.63112e-11
3916	3.3713e-14	15.6379	600	5.57288e-11
3918	3.33607e-14	15.6379	600	5.51463e-11
3920	3.30083e-14	15.6379	600	5.45638e-11
3922	3.26559e-14	15.6379	600	5.39814e-11
3924	3.23036e-14	15.6379	600	5.33989e-11
3926	3.19512e-14	15.6379	600	5.28164e-11
3928	3.15989e-14	15.6379	600	5.22339e-11
3930	3.12465e-14	15.6379	600	5.16515e-11
3932	3.08941e-14	15.6379	600	5.1069e-11
3934	3.05418e-14	15.6379	600	5.04865e-11
3936	3.01894e-14	15.6379	600	4.99041e-11
3938	2.9837e-14	15.6379	600	4.93216e-11
3940	2.94847e-14	15.6379	600	4.87391e-11
3942	2.91323e-14	15.6379	600	4.81567e-11
3944	2.87799e-14	15.6379	600	4.75742e-11
3946	2.84276e-14	15.6379	600	4.69917e-11
3948	2.80752e-14	15.6379	600	4.64093e-11
3950	2.77228e-14	15.6379	600	4.58268e-11
3952	2.73705e-14	15.6379	600	4.52443e-11
3954	2.70181e-14	15.6379	600	4.46618e-11
3956	2.66658e-14	15.6379	600	4.40794e-11
3958	2.63134e-14	15.6379	600	4.34969e-11
3960	2.5961e-14	15.6379	600	4.29144e-11
3962	2.56087e-14	15.6379	600	4.2332e-11
3964	2.52563e-14	15.6379	600	4.17495e-11
3966	2.49039e-14	15.6379	600	4.1167e-11
3968	2.45516e-14	15.6379	600	4.05846e-11
3970	2.41992e-14	15.6379	600	4.00021e-11
3972	2.38468e-14	15.6379	600	3.94196e-11
3974	2.34945e-14	15.6379	600	3.88371e-11
3976	2.31421e-14	15.6379	600	3.82547e-11
3978	2.27898e-14	15.6379	600	3.76722e-11
3980	2.24374e-14	15.6379	600	3.70897e-11
3982	2.2085e-14	15.6379	600	3.65073e-11
3984	2.17327e-14	15.6379	600	3.59248e-11
3986	2.13803e-14	15.6379	600	3.53423e-11
3988	2.10279e-14	15.6379	600	3.47599e-11
3990	2.06756e-14	15.6379	600	3.41774e-11
3992	2.03232e-14	15.6379	600	3.35949e-11
3994	1.99708e-14	15.6379	600	3.30125e-11
3996	1.96185e-14	15.6379	600	3.243e-11
[truncated: 2 more rows]

## Sheet: varytarget_6-1Csx1-0Crn1-0Acr
Time	cA4	cleavedRNA	A2>P	cA4_Csx1 + cA4_Csx1_RNA
0	0	0	0	0
20	2.30449	7.42109	0	0.999535
40	3.78879	15.7769	0	0.999826
60	4.45584	24.1329	0	0.99985
80	4.75557	32.4886	0	0.999858
100	4.89024	40.844	0	0.999861
120	4.95076	49.199	0	0.999861
140	4.97795	57.5536	0	0.999861
160	4.99017	65.9078	0	0.99986
180	4.99566	74.2616	0	0.999859
200	4.99813	82.615	0	0.999858
220	4.99924	90.968	0	0.999856
240	4.99974	99.3206	0	0.999855
260	4.99996	107.673	0	0.999854
280	5.00007	116.024	0	0.999852
300	5.00011	124.376	0	0.999851
320	5.00013	132.726	0	0.99985
340	5.00014	141.077	0	0.999848
360	5.00015	149.426	0	0.999847
380	5.00015	157.776	0	0.999845
400	5.00016	166.124	0	0.999844
420	5.00016	174.473	0	0.999842
440	5.00016	182.82	0	0.99984
460	5.00016	191.168	0	0.999839
480	5.00016	199.514	0	0.999837
500	5.00016	207.86	0	0.999835
520	5.00017	216.206	0	0.999834
540	5.00017	224.551	0	0.999832
560	5.00017	232.895	0	0.99983
580	5.00017	241.239	0	0.999828
600	5.00017	249.582	0	0.999826
620	5.00018	257.925	0	0.999824
640	5.00018	266.267	0	0.999822
660	5.00018	274.608	0	0.99982
680	5.00018	282.948	0	0.999818
700	5.00018	291.288	0	0.999816
720	5.00019	299.627	0	0.999814
740	5.00019	307.966	0	0.999812
760	5.00019	316.303	0	0.999809
780	5.00019	324.64	0	0.999807
800	5.0002	332.976	0	0.999805
820	5.0002	341.312	0	0.999802
840	5.0002	349.646	0	0.9998
860	5.0002	357.98	0	0.999797
880	5.00021	366.313	0	0.999794
900	5.00021	374.645	0	0.999792
920	5.00021	382.976	0	0.999789
940	5.00021	391.306	0	0.999786
960	5.00022	399.635	0	0.999783
980	5.00022	407.963	0	0.99978
1000	5.00022	416.29	0	0.999777
1020	5.00023	424.616	0	0.999774
1040	5.00023	432.941	0	0.99977
1060	5.00023	441.265	0	0.999767
1080	5.00024	449.588	0	0.999764
1100	5.00024	457.91	0	0.99976
1120	5.00024	466.23	0	0.999756
1140	5.00025	474.549	0	0.999752
1160	5.00025	482.867	0	0.999748
1180	5.00026	491.184	0	0.999744
1200	5.00026	499.499	0	0.99974
1220	5.00026	507.813	0	0.999736
1240	5.00027	516.125	0	0.999731
1260	5.00027	524.436	0	0.999727
1280	5.00028	532.745	0	0.999722
1300	5.00028	541.053	0	0.999717
1320	5.00029	549.359	0	0.999712
1340	5.00029	557.663	0	0.999706
1360	5.0003	565.966	0	0.999701
1380	5.0003	574.266	0	0.999695
1400	5.00031	582.565	0	0.999689
1420	5.00032	590.862	0	0.999683
1440	5.00032	599.156	0	0.999676
1460	5.00033	607.448	0	0.99967
1480	5.00034	615.739	0	0.999662
1500	5.00034	624.026	0	0.999655
1520	5.00035	632.312	0	0.999647
1540	5.00036	640.594	0	0.999639
1560	5.00037	648.874	0	0.999631
1580	5.00038	657.151	0	0.999622
1600	5.00039	665.426	0	0.999613
1620	5.0004	673.697	0	0.999603
1640	5.00041	681.964	0	0.999593
1660	5.00042	690.229	0	0.999582
1680	5.00043	698.49	0	0.999571
1700	5.00044	706.746	0	0.999559
1720	5.00045	714.999	0	0.999547
1740	5.00047	723.248	0	0.999533
1760	5.00048	731.492	0	0.999519
1780	5.0005	739.732	0	0.999504
1800	5.00051	747.966	0	0.999488
1820	5.00053	756.195	0	0.999471
1840	5.00055	764.418	0	0.999453
1860	5.00057	772.635	0	0.999434
1880	5.00059	780.845	0	0.999413
1900	5.00061	789.048	0	0.999391
1920	5.00063	797.244	0	0.999366
1940	5.00066	805.431	0	0.99934
1960	5.00069	813.609	0	0.999312
1980	5.00072	821.778	0	0.999281
2000	5.00075	829.936	0	0.999248
2020	5.00079	838.082	0	0.999211
2040	5.00083	846.216	0	0.99917
2060	5.00087	854.336	0	0.999125
2080	5.00092	862.44	0	0.999075
2100	5.00098	870.526	0	0.999019
2120	5.00104	878.593	0	0.998956
2140	5.00112	886.638	0	0.998885
2160	5.0012	894.658	0	0.998803
2180	5.00129	902.649	0	0.998709
2200	5.0014	910.607	0	0.998599
2220	5.00153	918.525	0	0.99847
2240	5.00168	926.397	0	0.998315
2260	5.00187	934.213	0	0.998128
2280	5.00211	941.96	0	0.997895
2300	5.0024	949.62	0	0.9976
2320	5.00278	957.17	0	0.997216
2340	5.0033	964.573	0	0.996699
2360	5.00403	971.774	0	0.995972
2380	5.00511	978.682	0	0.994894
2400	5.0068	985.144	0	0.993201
2420	5.0096	990.881	0	0.990399
2440	5.01411	995.422	0	0.98589
2460	5.01962	998.248	0	0.980385
2480	5.02337	999.471	0	0.976626
2500	5.02483	999.858	0	0.975168
2520	5.02526	999.963	0	0.974745
2540	5.02537	999.991	0	0.974633
2560	5.0254	999.998	0	0.974605
2580	5.0254	999.999	0	0.974597
2600	5.0254	1000	0	0.974595
2620	5.02541	1000	0	0.974595
2640	5.02541	1000	0	0.974595
2660	5.02541	1000	0	0.974595
2680	5.02541	1000	0	0.974595
2700	5.02541	1000	0	0.974595
2720	5.02541	1000	0	0.974595
2740	5.02541	1000	0	0.974595
2760	5.02541	1000	0	0.974595
2780	5.02541	1000	0	0.974595
2800	5.02541	1000	0	0.974595
2820	5.02541	1000	0	0.974595
2840	5.02541	1000	0	0.974595
2860	5.02541	1000	0	0.974595
2880	5.02541	1000	0	0.974595
2900	5.02541	1000	0	0.974595
2920	5.02541	1000	0	0.974595
2940	5.02541	1000	0	0.974595
2960	5.02541	1000	0	0.974595
2980	5.02541	1000	0	0.974595
3000	5.02541	1000	0	0.974595
3020	5.02541	1000	0	0.974595
3040	5.02541	1000	0	0.974595
3060	5.02541	1000	0	0.974595
3080	5.02541	1000	0	0.974595
3100	5.02541	1000	0	0.974595
3120	5.02541	1000	0	0.974595
3140	5.02541	1000	0	0.974595
3160	5.02541	1000	0	0.974595
3180	5.02541	1000	0	0.974595
3200	5.02541	1000	0	0.974595
3220	5.02541	1000	0	0.974595
3240	5.02541	1000	0	0.974595
3260	5.02541	1000	0	0.974595
3280	5.02541	1000	0	0.974595
3300	5.02541	1000	0	0.974595
3320	5.02541	1000	0	0.974595
3340	5.02541	1000	0	0.974595
3360	5.02541	1000	0	0.974595
3380	5.02541	1000	0	0.974595
3400	5.02541	1000	0	0.974595
3420	5.02541	1000	0	0.974595
3440	5.02541	1000	0	0.974595
3460	5.02541	1000	0	0.974595
3480	5.02541	1000	0	0.974595
3500	5.02541	1000	0	0.974595
3520	5.02541	1000	0	0.974595
3540	5.02541	1000	0	0.974595
3560	5.02541	1000	0	0.974595
3580	5.02541	1000	0	0.974595
3600	5.02541	1000	0	0.974595
3620	5.02541	1000	0	0.974595
3640	5.02541	1000	0	0.974595
3660	5.02541	1000	0	0.974595
3680	5.02541	1000	0	0.974595
3700	5.02541	1000	0	0.974595
3720	5.02541	1000	0	0.974595
3740	5.02541	1000	0	0.974595
3760	5.02541	1000	0	0.974595
3780	5.02541	1000	0	0.974595
3800	5.02541	1000	0	0.974595
3820	5.02541	1000	0	0.974595
3840	5.02541	1000	0	0.974595
3860	5.02541	1000	0	0.974595
3880	5.02541	1000	0	0.974595
3900	5.02541	1000	0	0.974595
3920	5.02541	1000	0	0.974595
3940	5.02541	1000	0	0.974595
3960	5.02541	1000	0	0.974595
3980	5.02541	1000	0	0.974595
4000	5.02541	1000	0	0.974595

[truncated: 8 more sheets: varytarget_60-1Csx1-0Crn1-0Acr, varytarget_600-1Csx1-0Crn1-0Acr, varytarget_6-1Csx1-1Crn1-0Acr, varytarget_60-1Csx1-1Crn1-0Acr, varytarget_600-1Csx1-1Crn1-0Acr, varytarget_6-1Csx1-1Crn1-1Acr, varytarget_60-1Csx1-1Crn1-1Acr, varytarget_600-1Csx1-1Crn1-1Acr]
