# Supplementary material for: The dynamic interplay of host and viral enzymes in type III CRISPR-mediated cyclic nucleotide signalling
Source: eLife. 2020 Apr 27;9:e55852. doi: 10.7554/eLife.55852 (PMC7213978; doi:10.7554/eLife.55852)
Supplement: Figure 6—source data 2. [file elife-55852-fig6-data2.xlsx]

## Sheet: 60uMcA4dep_varyAcr
720 min (12h), 60 uM target_Csm_ATP
[target_Csm_ATP]	[Csx1]	[Crn1]	[AcrIII-1]	[cA4 remaining]	[cleaved RNA]	[A2]
60	1	1	0	1.03954e-05	98.5624	59.9855
60	1	1	0.01	7.29716e-06	90.92	59.9897
60	1	1	0.1	3.61143e-07	70.7847	59.9995
60	1	1	1	9.18417e-12	40.7064	60
60	1	1	10	2.83526e-12	17.437	60
600 min (10h), 60 uM target_Csm_ATP
[target_Csm_ATP]	[Csx1]	[Crn1]	[AcrIII-1]	[cA4 remaining]	[cleaved RNA]	[A2]
60	1	1	0	2.1892e-05	97.5085	59.9699
60	1	1	0.01	1.63464e-05	90.1422	59.9772
60	1	1	0.1	1.47943e-06	70.7271	59.9978
60	1	1	1	6.69863e-12	40.7064	60
60	1	1	10	1.2201e-12	17.437	60
480 min (8h), 60 uM target_Csm_ATP
[target_Csm_ATP]	[Csx1]	[Crn1]	[AcrIII-1]	[cA4 remaining]	[cleaved RNA]	[A2]
60	1	1	0	4.6742e-05	95.3038	59.9366
60	1	1	0.01	3.77085e-05	88.4082	59.9487
60	1	1	0.1	6.11811e-06	70.4913	59.9911
60	1	1	1	3.55821e-10	40.7064	60
60	1	1	10	2.57353e-11	17.437	60
360 min (6h), target_Csm_ATP
[target_Csm_ATP]	[Csx1]	[Crn1]	[AcrIII-1]	[cA4 remaining]	[cleaved RNA]	[A2]
60	1	1	0	0.000112487	90.5722	59.8611
60	1	1	0.01	9.38405e-05	84.4477	59.8807
60	1	1	0.1	2.63168e-05	69.5131	59.9626
60	1	1	1	4.0036e-08	40.7057	59.9999
60	1	1	10	1.6495e-09	17.4369	60
240 min (4h), 60 uM target_Csm_ATP
[target_Csm_ATP]	[Csx1]	[Crn1]	[AcrIII-1]	[cA4 remaining]	[cleaved RNA]	[A2]
60	1	1	0	0.000344033	79.7253	59.66
60	1	1	0.01	0.000297736	74.8155	59.6907
60	1	1	0.1	0.000143328	65.2785	59.8293
60	1	1	1	4.27447e-06	40.6339	59.9892
60	1	1	10	1.97941e-07	17.4336	59.9956
120 min (1h), 60 uM target_Csm_ATP
[target_Csm_ATP]	[Csx1]	[Crn1]	[AcrIII-1]	[cA4 remaining]	[cleaved RNA]	[A2]
60	1	1	0	2.8832	50.0377	54.6418
60	1	1	0.01	0.00296214	48.5092	58.6381
60	1	1	0.1	0.0015904	46.0711	58.7735
60	1	1	1	0.000279747	36.275	59.2
60	1	1	10	2.38946e-05	17.0435	59.468
60 min (1h), 60 uM target_Csm_ATP
[target_Csm_ATP]	[Csx1]	[Crn1]	[AcrIII-1]	[cA4 remaining]	[cleaved RNA]	[A2]
60	1	1	0	25.3816	24.9697	27.1774
60	1	1	0.01	12.8913	24.9692	39.6601
60	1	1	0.1	0.0153252	24.6416	53.3572
60	1	1	1	0.00237673	22.6728	53.7202
60	1	1	10	0.0002551	13.8291	54.2546
30 min (0.5h), 60 uM target_Csm_ATP
[target_Csm_ATP]	[Csx1]	[Crn1]	[AcrIII-1]	[cA4 remaining]	[cleaved RNA]	[A2]
60	1	1	0	26.5252	12.434	13.4052
60	1	1	0.01	20.4087	12.4337	19.5124
60	1	1	0.1	0.0707723	12.3862	40.2788
60	1	1	1	0.00790382	11.8634	40.8389
60	1	1	10	0.000830031	8.54924	41.2146
15 min (0.25h), 60 uM target_Csm_ATP
[target_Csm_ATP]	[Csx1]	[Crn1]	[AcrIII-1]	[cA4 remaining]	[cleaved RNA]	[A2]
60	1	1	0	18.5527	6.16588	6.52152
60	1	1	0.01	15.6302	6.16559	9.43476
60	1	1	0.1	0.207329	6.15465	25.0292
60	1	1	1	0.0148334	5.95896	25.8271
60	1	1	10	0.00150619	4.57487	26.2813
5 min, 60 uM target_Csm_ATP
[target_Csm_ATP]	[Csx1]	[Crn1]	[AcrIII-1]	[cA4 remaining]	[cleaved RNA]	[A2]
60	1	1	0	6.94228	1.98812	1.94178
60	1	1	0.01	6.12881	1.98686	2.74667
60	1	1	0.1	0.711608	1.9836	8.16232
60	1	1	1	0.0229145	1.92434	9.4988
60	1	1	10	0.00224763	1.48252	9.96635

## Sheet: 60uMcA4free_varyAcr_3D plot
cA4 depleted
		720	600	480	360	240	120	60	30	15	5
	0	1.03954e-05	2.1892e-05	4.6742e-05	0.000112487	0.000344033	2.8832	25.3816	26.5252	18.5527	6.94228
	0.01	7.29716e-06	1.63464e-05	3.77085e-05	9.38405e-05	0.000297736	0.00296214	12.8913	20.4087	15.6302	6.12881
	0.1	3.61143e-07	1.47943e-06	6.11811e-06	2.63168e-05	0.000143328	0.0015904	0.0153252	0.0707723	0.207329	0.711608
	1	9.18417e-12	6.69863e-12	3.55821e-10	4.0036e-08	4.27447e-06	0.000279747	0.00237673	0.00790382	0.0148334	0.0229145
	10	2.83526e-12	1.2201e-12	2.57353e-11	1.6495e-09	1.97941e-07	2.38946e-05	0.0002551	0.000830031	0.00150619	0.00224763
		5	15	30	60	120	240	360	480	600	720			5	15	30	60	120	240	360	480	600	720
	0	6.94228	18.5527	26.5252	25.3816	2.8832	0.000344033	0.000112487	4.6742e-05	2.1892e-05	1.03954e-05		10	0.00224763	0.00150619	0.000830031	0.0002551	2.38946e-05	1.97941e-07	1.6495e-09	2.57353e-11	1.2201e-12	2.83526e-12
	0.01	6.12881	15.6302	20.4087	12.8913	0.00296214	0.000297736	9.38405e-05	3.77085e-05	1.63464e-05	7.29716e-06		1	0.0229145	0.0148334	0.00790382	0.00237673	0.000279747	4.27447e-06	4.0036e-08	3.55821e-10	6.69863e-12	9.18417e-12
	0.1	0.711608	0.207329	0.0707723	0.0153252	0.0015904	0.000143328	2.63168e-05	6.11811e-06	1.47943e-06	3.61143e-07		0.1	0.711608	0.207329	0.0707723	0.0153252	0.0015904	0.000143328	2.63168e-05	6.11811e-06	1.47943e-06	3.61143e-07
	1	0.0229145	0.0148334	0.00790382	0.00237673	0.000279747	4.27447e-06	4.0036e-08	3.55821e-10	6.69863e-12	9.18417e-12		0.01	6.12881	15.6302	20.4087	12.8913	0.00296214	0.000297736	9.38405e-05	3.77085e-05	1.63464e-05	7.29716e-06
	10	0.00224763	0.00150619	0.000830031	0.0002551	2.38946e-05	1.97941e-07	1.6495e-09	2.57353e-11	1.2201e-12	2.83526e-12		0	6.94228	18.5527	26.5252	25.3816	2.8832	0.000344033	0.000112487	4.6742e-05	2.1892e-05	1.03954e-05

## Sheet: 60uMcA4RNAdeg_varyAcr_3Dplot
RNA cleaved
		5	15	30	60	120	240	360	480	600	720
	0	1.98812	6.16588	12.434	24.9697	50.0377	79.7253	90.5722	95.3038	97.5085	98.5624
	0.01	1.98686	6.16559	12.4337	24.9692	48.5092	74.8155	84.4477	88.4082	90.1422	90.92
	0.1	1.9836	6.15465	12.3862	24.6416	46.0711	65.2785	69.5131	70.4913	70.7271	70.7847
	1	1.92434	5.95896	11.8634	22.6728	36.275	40.6339	40.7057	40.7064	40.7064	40.7064
	10	1.48252	4.57487	8.54924	13.8291	17.0435	17.4336	17.4369	17.437	17.437	17.437

## Sheet: 60additional_varyCsx1_Crn1_Acr
720 min (12h), 60 uM target_Csm_ATP
[ target_Csm_ATP]	[Csx1]	[Crn1]	[AcrIII-1]	identifier	[cA4 remaining]	[cleaved RNA]	[A2]
60	1	1	1	(1,1,1)	9.18417e-12	40.7064	60
60	10	1	1	(10,1,1)	2.93335e-07	504.085	59.9977
60	10	10	1	(10,10,1)	7.31386e-09	395.861	59.9999
60	10	1	10	(10,1,10)	2.70405e-13	178.626	60
60	1	1	10	(1,1,10)	2.83526e-12	17.437	60
60	10	1	0	(10,1,0)	1.97643e-08	991.164	60
60	10	10	10	(10,10,10)	2.15622e-13	171.148	60
600 min (10h), 60 uM target_Csm_ATP
[ target_Csm_ATP]	[Csx1]	[Crn1]	[AcrIII-1]	identifier	[cA4 remaining]	[cleaved RNA]	[A2]
60	1	1	1	(1,1,1)	6.69863e-12	40.7064	60
60	10	1	1	(10,1,1)	1.30677e-06	503.824	59.9899
60	10	10	1	(10,10,1)	6.25076e-08	395.849	59.9994
60	10	1	10	(10,1,10)	1.76459e-12	178.626	60
60	1	1	10	(1,1,10)	1.2201e-12	17.437	60
60	10	1	0	(10,1,0)	1.58745e-06	991.162	59.9996
60	10	10	10	(10,10,10)	7.45652e-13	171.148	60
480 min (8h), 60 uM target_Csm_ATP
[ target_Csm_ATP]	[Csx1]	[Crn1]	[AcrIII-1]	identifier	[cA4 remaining]	[cleaved RNA]	[A2]
60	1	1	1	(1,1,1)	3.55821e-10	40.7064	60
60	10	1	1	(10,1,1)	5.83241e-06	502.661	59.9549
60	10	10	1	(10,10,1)	5.34834e-07	395.745	59.9948
60	10	1	10	(10,1,10)	3.54208e-11	178.626	60
60	1	1	10	(1,1,10)	2.57353e-11	17.437	60
60	10	1	0	(10,1,0)	0.00012792	990.963	59.9702
60	10	10	10	(10,10,10)	2.94198e-11	171.148	60
360 min (6h), 60 uM target_Csm_ATP
[ target_Csm_ATP]	[Csx1]	[Crn1]	[AcrIII-1]	identifier	[cA4 remaining]	[cleaved RNA]	[A2]
60	1	1	1	(1,1,1)	4.0036e-08	40.7057	59.9999
60	10	1	1	(10,1,1)	2.62521e-05	497.466	59.7983
60	10	10	1	(10,10,1)	4.59027e-06	394.855	59.9558
60	10	1	10	(10,1,10)	3.78241e-09	178.625	59.9999
60	1	1	10	(1,1,10)	1.6495e-09	17.4369	60
60	10	1	0	(10,1,0)	0.00352023	977.175	58.6765
60	10	10	10	(10,10,10)	3.19987e-09	171.147	59.9999
240 min (4h), 60 uM target_Csm_ATP
[ target_Csm_ATP]	[Csx1]	[Crn1]	[AcrIII-1]	identifier	[cA4 remaining]	[cleaved RNA]	[A2]
60	1	1	1	(1,1,1)	4.27477e-06	40.6339	59.9892
60	10	1	1	(10,1,1)	0.000123106	474.018	59.0792
60	10	10	1	(10,10,1)	4.01854e-05	387.234	59.6177
60	10	1	10	(10,1,10)	4.48488e-07	178.563	59.99
60	1	1	10	(1,1,10)	1.97941e-07	17.4336	59.9956
60	10	1	0	(10,1,0)	0.00338064	830.575	54.9613
60	10	10	10	(10,10,10)	3.82702e-07	171.094	59.9907
120 min (1h), 60 uM target_Csm_ATP
[ target_Csm_ATP]	[Csx1]	[Crn1]	[AcrIII-1]	identifier	[cA4 remaining]	[cleaved RNA]	[A2]
60	1	1	1	(1,1,1)	0.000279747	36.275	59.2
60	10	1	1	(10,1,1)	0.000737227	365.881	55.2945
60	10	10	1	(10,10,1)	0.000403865	323.566	56.4476
60	10	1	10	(10,1,10)	4.26202e-05	172.378	58.9687
60	1	1	10	(1,1,10)	2.38946e-05	17.0435	59.468
60	10	1	0	(10,1,0)	0.0154466	489.471	50.0374
60	10	10	10	(10,10,10)	3.8087e-05	165.569	59.0125
60 min (1h), 60 uM target_Csm_ATP
[ target_Csm_ATP]	[Csx1]	[Crn1]	[AcrIII-1]	identifier	[cA4 remaining]	[cleaved RNA]	[A2]
60	1	1	1	(1,1,1)	0.00237673	22.6728	53.7202
60	10	1	1	(10,1,1)	0.00293024	217.245	46.7043
60	10	10	1	(10,10,1)	0.00176503	203.945	47.3918
60	10	1	10	(10,1,10)	0.000330266	133.953	51.4261
60	1	1	10	(1,1,10)	0.0002551	13.8291	54.2546
60	10	1	0	(10,1,0)	18.2613	241.168	25.299
60	10	10	10	(10,10,10)	0.00030422	129.714	51.5377
30 min (0.5h), 60 uM target_Csm_ATP
[ target_Csm_ATP]	[Csx1]	[Crn1]	[AcrIII-1]	identifier	[cA4 remaining]	[cleaved RNA]	[A2]
60	1	1	1	(1,1,1)	0.00790382	11.8634	40.8389
60	10	1	1	(10,1,1)	0.00823172	110.162	32.5773
60	10	10	1	(10,10,1)	0.0048771	105.856	32.3822
60	10	1	10	(10,1,10)	0.000923696	79.3219	36.1716
60	1	1	10	(1,1,10)	0.000830031	8.54924	41.3146
60	10	1	0	(10,1,0)	19.395	115.946	11.5365
60	10	10	10	(10,10,10)	0.000857034	77.2679	36.2116
15 min (0.25h), 60 uM target_Csm_ATP
[ target_Csm_ATP]	[Csx1]	[Crn1]	[AcrIII-1]	identifier	[cA4 remaining]	[cleaved RNA]	[A2]
60	1	1	1	(1,1,1)	0.0148334	5.95896	25.8271
60	10	1	1	(10,1,1)	0.0150427	51.3572	17.2215
60	10	10	1	(10,10,1)	0.00886614	49.4076	16.3443
60	10	1	10	(10,1,10)	0.00159055	39.3574	19.9473
60	1	1	10	(1,1,10)	0.00150619	4.57487	26.2813
60	10	1	0	(10,1,0)	11.4163	53.2957	4.66032
60	10	10	10	(10,10,10)	0.00147642	38.3426	19.8692
5 min, 60 uM target_Csm_ATP
[ target_Csm_ATP]	[Csx1]	[Crn1]	[AcrIII-1]	identifier	[cA4 remaining]	[cleaved RNA]	[A2]
60	1	1	1	(1,1,1)	0.0229145	1.92434	9.4988
60	10	1	1	(10,1,1)	0.0133358	11.095	1.15879
60	10	10	1	(10,10,1)	0.00525344	10.4365	1.28792
60	10	1	10	(10,1,10)	0.00168117	8.83187	3.80993
60	1	1	10	(1,1,10)	0.00224763	1.48252	9.96635
60	10	1	0	(10,1,0)	0.126378	11.526	0.160652
60	10	10	10	(10,10,10)	0.00151427	8.53967	3.81457

## Sheet: 60additional_plotRNA cleaved
		5	15	30	60	120	240	360	480	600	720
	(10, 1, 0)	11.526	53.2957	115.946	241.168	489.471	830.575	977.175	990.963	991.162	991.164
	(10, 1, 1)	11.095	51.3572	110.162	217.245	365.881	474.018	497.466	502.661	503.824	504.085
	(10, 10, 1)	10.4365	49.4076	105.856	203.945	323.566	387.234	394.855	395.745	395.849	395.861
	(10, 1, 10)	8.83187	39.3574	79.3219	133.953	172.378	178.563	178.625	178.626	178.626	178.626
	(10, 10, 10)	8.53967	38.3426	77.2679	129.714	165.569	171.094	171.147	171.148	171.148	171.148
	(1 ,1 ,1)	1.92434	5.95896	11.8634	22.6728	36.275	40.6339	40.7057	40.7064	40.7064	40.7064
	(1, 1, 10)	1.48252	4.57487	8.54924	13.8291	17.0435	17.4336	17.4369	17.437	17.437	17.437

## Sheet: 60additional_plot_cA4free
		720	600	480	360	240	120	60	30	15	5
	(10, 1, 0)	1.97643e-08	1.58745e-06	0.00012792	0.00352023	0.00338064	0.0154466	18.2613	19.395	11.4163	0.126378
	(10, 1, 1)	2.93335e-07	1.30677e-06	5.83241e-06	2.62521e-05	0.000123106	0.000737227	0.00293024	0.00823172	0.0150427	0.0133358
	(10, 10, 1)	7.31386e-09	6.25076e-08	5.34834e-07	4.59027e-06	4.01854e-05	0.000403865	0.00176503	0.0048771	0.00886614	0.00525344
	(10, 1, 10)	2.70405e-13	1.76459e-12	3.54208e-11	3.78241e-09	4.48488e-07	4.26202e-05	0.000330266	0.000923696	0.00159055	0.00168117
	(1 ,1 ,1)	9.18417e-12	6.69863e-12	3.56e-10	4.0036e-08	4.27477e-06	0.000279747	0.00237673	0.00790382	0.0148334	0.0229145
	(1, 1, 10)	2.83526e-12	1.2201e-12	2.57353e-11	1.6495e-09	1.97941e-07	2.38946e-05	0.0002551	0.000830031	0.00150619	0.00224763

## Sheet: 600uMcA4dep_varyAcr
720 min (12h), 600 uM target_Csm_ATP
[target_Csm_ATP]	[Csx1]	[Crn1]	[AcrIII-1]	[cA4 remaining]	[cleaved RNA]	[A2]
60	1	1	0	266.886	300.597	331.114
60	1	1	0.01	111.54	300.596	486.451
60	1	1	0.1	7.59098e-07	115.663	599.999
60	1	1	1	5.94906e-12	64.3681	600
60	1	1	10	6.40633e-13	39.4767	600
600 min (10h), 600 uM target_Csm_ATP
[target_Csm_ATP]	[Csx1]	[Crn1]	[AcrIII-1]	[cA4 remaining]	[cleaved RNA]	[A2]
60	1	1	0	322.076	250.543	275.924
60	1	1	0.01	192.597	250.543	405.394
60	1	1	0.1	3.34784e-06	115.542	599.995
60	1	1	1	3.5634e-11	64.3681	600
60	1	1	10	1.23561e-11	39.4767	600
480 min (8h), 600 uM target_Csm_ATP
[target_Csm_ATP]	[Csx1]	[Crn1]	[AcrIII-1]	[cA4 remaining]	[cleaved RNA]	[A2]
60	1	1	0	377.267	200.468	220.733
60	1	1	0.01	273.676	200.467	324.314
60	1	1	0.1	1.51076e-05	115.011	599.979
60	1	1	1	3.25636e-09	64.3681	600
60	1	1	10	1.61834e-10	39.4767	600
360 min (6h), 600 µM target_Csm_ATP
[target_Csm_ATP]	[Csx1]	[Crn1]	[AcrIII-1]	[cA4 remaining]	[cleaved RNA]	[A2]
60	1	1	0	432.459	150.372	165.54
60	1	1	0.01	354.765	150.372	243.224
60	1	1	0.1	7.61541e-05	112.59	599.903
60	1	1	1	3.72739e-07	64.3621	599.999
60	1	1	10	1.63036e-08	39.4764	600
240 min (4h), 600 uM target_Csm_ATP
[target_Csm_ATP]	[Csx1]	[Crn1]	[AcrIII-1]	[cA4 remaining]	[cleaved RNA]	[A2]
60	1	1	0	487.612	100.259	110.347
60	1	1	0.01	435.821	100.259	162.128
60	1	1	0.1	0.00133564	99.3845	599.276
60	1	1	1	3.38432e-05	63.7934	599.91
60	1	1	10	1.97423e-06	39.4444	599.956
120 min (1h), 600 uM target_Csm_ATP
[target_Csm_ATP]	[Csx1]	[Crn1]	[AcrIII-1]	[cA4 remaining]	[cleaved RNA]	[A2]
60	1	1	0	537.909	50.1309	55.1529
60	1	1	0.01	512.024	50.1309	81.0281
60	1	1	0.1	279.12	50.1308	313.842
60	1	1	1	0.00216432	47.3878	594.251
60	1	1	10	0.000231778	36.2209	594.785
60 min (1h), 600 uM target_Csm_ATP
[target_Csm_ATP]	[Csx1]	[Crn1]	[AcrIII-1]	[cA4 remaining]	[cleaved RNA]	[A2]
60	1	1	0	516.014	25.0615	27.5557
60	1	1	0.01	503.082	25.0615	40.4772
60	1	1	0.1	386.729	25.0613	156.741
60	1	1	1	0.0256885	24.8632	544.153
60	1	1	10	0.00249179	22.8796	544.632
30 min (0.5h), 600 uM target_Csm_ATP
[target_Csm_ATP]	[Csx1]	[Crn1]	[AcrIII-1]	[cA4 remaining]	[cleaved RNA]	[A2]
60	1	1	0	403.526	12.5255	13.7573
60	1	1	0.01	419.283	12.5255	20.2023
60	1	1	0.1	338.998	12.5253	78.1854
60	1	1	1	0.116477	12.4976	417.169
60	1	1	10	0.00845425	11.9857	417.88
15 min (0.25h), 600 uM target_Csm_ATP
[target_Csm_ATP]	[Csx1]	[Crn1]	[AcrIII-1]	[cA4 remaining]	[cleaved RNA]	[A2]
60	1	1	0	261.855	6.2572	6.85842
60	1	1	0.01	258.637	6.25719	10.0658
60	1	1	0.1	229.699	6.25705	38.9144
60	1	1	1	0.360296	6.25145	267.891
60	1	1	10	0.0158588	6.05891	268.904
5 min, 600 uM target_Csm_ATP
[target_Csm_ATP]	[Csx1]	[Crn1]	[AcrIII-1]	[cA4 remaining]	[cleaved RNA]	[A2]
60	1	1	0	104.502	2.07824	2.25985
60	1	1	0.01	103.442	2.07822	3.31028
60	1	1	0.1	93.9127	2.07809	12.7497
60	1	1	1	4.44723	2.07646	101.379
60	1	1	10	0.0244475	2.01541	106.547

## Sheet: 600uMcA4free_varyAcr_3D plot
cA4 depleted
		720	600	480	360	240	120	60	30	15	5
	0	266.886	322.076	377.267	432.459	487.612	537.909	516.014	403.526	261.855	104.502
	0.01	111.54	192.597	273.676	354.765	435.821	512.024	503.082	419.283	258.637	103.442
	0.1	7.59098e-07	3.34784e-06	1.51076e-05	7.61541e-05	0.00133564	279.12	386.729	338.998	229.699	93.9127
	1	5.94906e-12	3.5634e-11	3.25636e-09	3.72739e-07	3.38432e-05	0.00216432	0.0256885	0.116477	0.360296	4.44723
	10	6.40633e-13	1.23561e-11	1.61834e-10	1.63036e-08	1.97423e-06	0.000231778	0.00249179	0.00845425	0.0158588	0.0244475
		5	15	30	60	120	240	360	480	600	720			5	15	30	60	120	240	360	480	600	720
	0	104.502	261.855	403.526	516.014	537.909	487.612	432.459	377.267	322.076	266.886		10	0.0244475	0.0158588	0.00845425	0.00249179	0.000231778	1.97423e-06	1.63036e-08	1.61834e-10	1.23561e-11	6.40633e-13
	0.01	103.442	258.637	419.283	503.082	512.024	435.821	354.765	273.676	192.597	111.54		1	4.44723	0.360296	0.116477	0.0256885	0.00216432	3.38432e-05	3.72739e-07	3.25636e-09	3.5634e-11	5.94906e-12
	0.1	93.9127	229.699	338.998	386.729	279.12	0.00133564	7.61541e-05	1.51076e-05	3.34784e-06	7.59098e-07		0.1	93.9127	229.699	338.998	386.729	279.12	0.00133564	7.61541e-05	1.51076e-05	3.34784e-06	7.59098e-07
	1	4.44723	0.360296	0.116477	0.0256885	0.00216432	3.38432e-05	3.72739e-07	3.25636e-09	3.5634e-11	5.94906e-12		0.01	103.442	258.637	419.283	503.082	512.024	435.821	354.765	273.676	192.597	111.54
	10	6.40633e-13	0.0158588	0.00845425	0.00249179	0.000231778	1.97423e-06	1.63036e-08	1.61834e-10	1.23561e-11	6.40633		0	104.502	261.855	403.526	516.014	537.909	487.612	432.459	377.267	322.076	266.886

## Sheet: 600uMcA4RNAdeg_varyAcr_3Dplot
RNA cleaved
		5	15	30	60	120	240	360	480	600	720
	0	2.07824	6.2572	12.5255	25.0615	50.1309	100.259	150.372	200.468	250.543	300.597
	0.01	2.07822	6.25719	12.5255	25.0615	50.1309	100.259	150.372	200.467	250.543	300.596
	0.1	2.07809	6.25705	12.5253	25.0613	50.1308	99.3845	112.59	115.011	115.542	115.663
	1	2.07646	6.25145	12.4976	24.8632	47.3878	63.7934	64.3621	64.3681	64.3681	64.3681
	10	2.01541	6.05891	11.9857	22.8796	36.2209	39.4444	39.4764	39.4767	39.4767	39.4767

## Sheet: 600additional_varyCsx1_Crn1
720 min (12h), 600 uM target_Csm_ATP
[ target_Csm_ATP]	[Csx1]	[Crn1]	[AcrIII-1]	identifier	[cA4 remaining]	[cleaved RNA]	[A2]
60	1	1	1	(1,1,1)	5.94906e-12	64.3681	600
60	10	1	1	(10,1,1)	3.61925e-08	661.537	600
60	10	10	1	(10,10,1)	5.128e-10	577.702	600
60	10	1	10	(10,1,10)	1.20055e-12	376.645	600
60	1	1	10	(1,1,10)	6.40633e-13	39.4767	600
60	10	1	0	(10,1,0)	258.055	1000	330.951
600 min (10h), 600 uM target_Csm_ATP
[ target_Csm_ATP]	[Csx1]	[Crn1]	[AcrIII-1]	identifier	[cA4 remaining]	[cleaved RNA]	[A2]
60	1	1	1	(1,1,1)	3.5634e-11	64.3681	600
60	10	1	1	(10,1,1)	3.1862e-07	661.503	599.998
60	10	10	1	(10,10,1)	1.05074e-08	577.701	600
60	10	1	10	(10,1,10)	3.84613e-12	376.645	600
60	1	1	10	(1,1,10)	1.23561e-11	39.4767	600
60	10	1	0	(10,1,0)	313.243	1000	275.761
480 min (8h), 600 uM target_Csm_ATP
[ target_Csm_ATP]	[Csx1]	[Crn1]	[AcrIII-1]	identifier	[cA4 remaining]	[cleaved RNA]	[A2]
60	1	1	1	(1,1,1)	3.25636e-09	64.3681	600
60	10	1	1	(10,1,1)	2.80744e-06	661.202	599.985
60	10	10	1	(10,10,1)	2.17708e-07	577.679	599.999
60	10	1	10	(10,1,10)	2.38827e-10	376.645	600
60	1	1	10	(1,1,10)	1.61834e-10	39.4767	600
60	10	1	0	(10,1,0)	368.434	1000	220.57
360 min (6h), 600 uM target_Csm_ATP
[ target_Csm_ATP]	[Csx1]	[Crn1]	[AcrIII-1]	identifier	[cA4 remaining]	[cleaved RNA]	[A2]
60	1	1	1	(1,1,1)	3.72739e-07	64.3621	599.999
60	10	1	1	(10,1,1)	2.48227e-05	658.557	599.868
60	10	10	1	(10,10,1)	4.44487e-06	577.215	599.969
60	10	1	10	(10,1,10)	2.74948e-08	376.643	599.999
60	1	1	10	(1,1,10)	1.63036e-08	39.4767	600
60	10	1	0	(10,1,0)	423.625	1000	165.378
240 min (4h), 600 uM target_Csm_ATP
[ target_Csm_ATP]	[Csx1]	[Crn1]	[AcrIII-1]	identifier	[cA4 remaining]	[cleaved RNA]	[A2]
60	1	1	1	(1,1,1)	3.38432e-05	63.7934	599.91
60	10	1	1	(10,1,1)	0.000223869	635.458	598.827
60	10	10	1	(10,10,1)	8.49729e-05	568.308	599.4
60	10	1	10	(10,1,10)	3.28842e-06	376.302	599.926
60	1	1	10	(1,1,10)	1.97423e-06	39.4444	599.956
60	10	1	0	(10,1,0)	478.776	983.366	110.184
120 min (1h), 600 uM target_Csm_ATP
[ target_Csm_ATP]	[Csx1]	[Crn1]	[AcrIII-1]	identifier	[cA4 remaining]	[cleaved RNA]	[A2]
60	1	1	1	(1,1,1)	0.00216432	47.3878	594.251
60	10	1	1	(10,1,1)	0.00284514	463.349	587.992
60	10	10	1	(10,10,1)	0.00169541	445.542	588.835
60	10	1	10	(10,1,10)	0.000296697	346.416	592.704
60	1	1	10	(1,1,10)	0.000231778	36.2209	594.785
60	10	1	0	(10,1,0)	529.072	499.589	54.9902
60 min (1h), 600 uM target_Csm_ATP
[ target_Csm_ATP]	[Csx1]	[Crn1]	[AcrIII-1]	identifier	[cA4 remaining]	[cleaved RNA]	[A2]
60	1	1	1	(1,1,1)	0.0256885	24.8632	544.153
60	10	1	1	(10,1,1)	0.0258791	247.248	535.452
60	10	10	1	(10,10,1)	0.0153289	245.547	533.83
60	10	1	10	(10,1,10)	0.00257391	224.899	537.874
60	1	1	10	(1,1,10)	0.00249179	22.8796	544.632
60	10	1	0	(10,1,0)	507.176	249.65	27.3931
30 min (0.5h), 600 uM target_Csm_ATP
[ target_Csm_ATP]	[Csx1]	[Crn1]	[AcrIII-1]	identifier	[cA4 remaining]	[cleaved RNA]	[A2]
60	1	1	1	(1,1,1)	0.116477	12.4976	417.169
60	10	1	1	(10,1,1)	0.116569	124.123	408.227
60	10	10	1	(10,10,1)	0.0702193	123.782	403.459
60	10	1	10	(10,1,10)	0.00849133	118.663	409.611
60	1	1	10	(1,1,10)	0.00845425	11.9856	417.88
60	10	1	0	(10,1,0)	394.689	124.432	13.5947
15 min (0.25h), 600 uM target_Csm_ATP
[ target_Csm_ATP]	[Csx1]	[Crn1]	[AcrIII-1]	identifier	[cA4 remaining]	[cleaved RNA]	[A2]
60	1	1	1	(1,1,1)	0.360296	6.25145	367.891
60	10	1	1	(10,1,1)	0.360424	61.7182	258.909
60	10	10	1	(10,10,1)	0.201488	61.5439	252.222
60	10	1	10	(10,1,10)	0.0158808	59.7393	260.285
60	1	1	10	(1,1,10)	0.0158588	6.05891	268.904
60	10	1	0	(10,1,0)	253.017	61.7818	6.69588
5 min, 600 uM target_Csm_ATP
[ target_Csm_ATP]	[Csx1]	[Crn1]	[AcrIII-1]	identifier	[cA4 remaining]	[cleaved RNA]	[A2]
60	1	1	1	(1,1,1)	4.44723	2.07646	101.379
60	10	1	1	(10,1,1)	3.94991	19.9809	92.8856
60	10	10	1	(10,10,1)	0.651086	19.8538	88.1665
60	10	1	10	(10,1,10)	0.024463	19.3746	97.7874
60	1	1	10	(1,1,10)	0.0244475	2.01541	106.547
60	10	1	0	(10,1,0)	95.6648	20.0023	2.09738

[truncated: 2 more sheets: 600additional_plotRNA cleaved, 600additional_plot_cA4free]
